# Supplementary material for: Promoting or inhibiting? The impact of sports industry investment on regional health equity
Source: Research Square preprint supplement (doi:10.21203/rs.3.rs-7835154/v1), 2025-10-14
Supplement: Supplementary file 1 [file c1ed580db55d3ff30d2ff4d0.xlsx]

## Sheet: Sheet1
id	year	ids	cites	invest	density	finance	fdi	hum	rd	transport	tle	energy	tle1	asset	gov	gov1	critic_score	l_invest	entropy_score	outflow	inflow	extend_invest	bacial_invest	income	str	capital	_est_a2	_est_a1	patent	tourism	income1
110000	2003	112003	北京市	0.1	6.84	3.28768	0.214675	4.50789	0.16	30671	2500000	6100000	1109	0.23	0.200596	0.80639	0.334362		0.179339	0.068722	0.035014	0.095255	0.008481	14535.2	257.8	1	1	1	0.5794	0.87	1.45352
110000	2004	112004	北京市	0.24	6.92	3.16985	0.308354	5.00245	0.18	29989	3200000	6400000	1336	0.28	0.209715	0.828796	0.32941	0.1	0.187482	0.083004	0.160049	0.233451	0.009602	16501.7	256.6	1	1	1	0.6786	1.195	1.65017
110000	2005	112005	北京市	0.75	7.2	2.22695	0.352638	5.36724	0.21	32103	3800000	6600000	1460	0.37	0.153683	0.868563	0.370094	0.24	0.207514	0.65129	0.098903	0.73715	0.013	18774.9	266.73	1	1	1	0.8744	1.25	1.87749
110000	2006	112006	北京市	0.72	7.3	1.89127	0.455191	5.54702	0.24	32998	4700000	6900000	1571	0.43	0.164777	0.861442	0.368443	0.75	0.21937	0.669871	0.051722	0.695833	0.026	21415.2	268.66	1	1	1	1.0204	1.32	2.14152
110000	2007	112007	北京市	0.72	7.39	1.83369	0.506572	5.67875	0.28	19895	6300000	7200000	1598	0.49	0.176355	0.904902	0.401825	0.72	0.250593	0.618076	0.103091	0.716892	0.004275	23752.2	270.01	1	1	1	1.3867	1.428	2.37522
110000	2008	112008	北京市	1.1	7.92	1.83839	0.608172	5.75639	0.32	20515	7500000	7400000	1616	0.59	0.186811	0.937752	0.419458	0.72	0.274787	0.846374	0.244995	1.065	0.027	26917.6	271.19	1	1	1	2.0223	1.4181	2.69176
110000	2009	112009	北京市	2.5	7.59	2.00485	0.612094	5.77154	0.38	20486	8700000	7700000	1825	0.68	0.190847	0.873863	0.437073	1.1	0.292106	2.294	0.199172	2.48	0.014	29329	273.56	1	1	1	2.4324	1.6257	2.9329
110000	2010	112010	北京市	2.7	7.66	1.99631	0.636358	5.77828	0.44	21886	11000000	8000000	2118	0.77	0.192532	0.86627	0.454624	2.5	0.323734	2.531	0.17995	2.689	0.022	32132.2	273.23	1	1	1	3.0342	1.79	3.21322
110000	2011	112011	北京市	4.5	7.79	1.95615	0.705447	5.78633	0.52	24788	4400000	8400000	2576	0.88	0.199683	0.926368	0.475469	2.7	0.352118	4.305	0.225466	4.521	0.01	36365.4	274.23	1	1	1	3.7624	2.0884	3.63654
110000	2012	112012	北京市	2.6	7.91	1.9306	0.80416	5.81844	0.62	26291	4900000	8700000	3168	1	0.20612	0.8995	0.508885	4.5	0.393968	2.274	0.281023	2.514	0.041	40306.3	274.62	1	1	1	4.6479	2.26337	4.03063
110000	2013	112013	北京市	2.1	8.02	1.96002	0.852418	5.89254	0.74	25865	5900000	9100000	3374	1.1	0.214028	0.877195	0.536304	2.6	0.418949	2.069	0.066177	2.119	0.016	44564	275.02	1	1	1	6.0469	2.47388	4.4564
110000	2014	112014	北京市	2.8	8.12	1.98986	0.904085	5.94614	0.89	26697	6900000	9400000	4076	1.3	0.212119	0.890045	0.549644	2.1	0.452208	2.708	0.126559	2.809	0.025	48531.9	276.22	1	1	1	6.8081	2.57222	4.85319
110000	2015	112015	北京市	2.5	8.2	2.1227	1.3	5.93448	1.1	25020	9200000	9800000	4052	1.5	0.249307	0.823302	0.568775	2.8	0.475667	2.382	0.14946	2.505	0.027	52859.2	278.04	1	1	1	7.2965	2.6859	5.28592
110000	2016	112016	北京市	2.3	8.2	2.20572	1.3	5.99188	1.3	25083	14000000	10000000	3869	1.7	0.249587	0.79312	0.579508	2.5	0.49588	2.173	0.144866	2.279	0.039	57275.3	278.72	1	1	1	8.0397	2.8115	5.72753
110000	2017	112017	北京市	2.2	8.2	2.26245	2.4	5.92878	1.6	25081	8800000	11000000	3752	1.9	0.243423	0.796362	0.601826	2.3	0.529879	2.026	0.140086	2.127	0.038	62406.3	279.13	1	1	1	8.6902	2.93536	6.24063
110000	2018	112018	北京市	2.6	8.2	2.32466	1.7	5.81133	1.9	25081	6200000	11000000	4009	2.2	0.246291	0.774811	0.63123	2.2	0.565895	2.367	0.248993	2.557	0.059	67989.9	279.59	1	1	1	9.7804	3.06932	6.79899
110000	2019	112019	北京市	3	8.2	2.08012	1.4	5.85971	2.2	25081	6200000	12000000	4020	2.5	0.209444	0.785219	0.667572	2.6	0.601432	2.834	0.19856	2.949	0.083	73848.5	282.2	1	1	1	10.4969	3.1833	7.38485
110000	2020	112020	北京市	1.9	8.2	2.24456	1.3	5.90335	2.6	25081	6500000	12000000	3996	2.9	0.197108	0.770623	0.669407	3	0.599964	1.691	0.200851	1.829	0.063	75601.5	282.57	1	1	1	11.8723	1.83524	7.56015
110000	2021	112021	北京市	0.23	8.2	2.13751	1.4	6.16978	2.9	25081	6800000	13000000	3972	3.3	0.17892	0.823346	0.676225	1.9	0.623111	0.202121	0.031088	0.205552	0.028	81517.5	280.39	1	1	1	12.2819	2.54883	8.15175
110000	2022	112022	北京市	0.16	8.2	2.29499	1.4	6.2659	3.4	25081	7300000	13000000	3927	3.7	0.1795	0.765061	0.684945	0.23	0.629108	0.133835	0.022477	0.136882	0.019	84023	282.59	1	1	1	12.3955	1.82067	8.4023
110000	2023	112023	北京市	0.52	8.2	2.48169	1.4	6.18348	3.8	25081	7500000	14000000	4021	4.2	0.182163	0.775387	0.709822	0.16	0.651349	0.466123	0.055498	0.421025	0.1	88650.2	283.61	1	1	1	10.8863	3.27	8.86502
120000	2003	122003	天津市	0.02	7.77	1.39971	0.163325	2.45213	0.46	34679	1100000	4400000	383	0.2	0.1275	0.655381	0.219582		0.093865	0.000313	0.015193	0.015282	0.000225	9822.98	240.8	1	1	1	0.2484	0.37511	0.982298
120000	2004	122004	天津市	0.01	7.82	1.30926	0.247243	2.86145	0.49	37283	1400000	4600000	423	0.24	0.127912	0.656443	0.22412	0.02	0.101876	0.002145	0.004735	0.006241	0.000638	10831.3	238.6	1	1	1	0.2736	0.4484	1.08313
120000	2005	122005	天津市	0.09	7.88	1.19467	0.332885	3.27417	0.46	39485	1700000	4800000	503	0.31	0.119569	0.750588	0.229698	0.01	0.10181	0.002964	0.084897	0.087215	0.000646	11839.1	237.45	1	1	1	0.2876	0.5013	1.18391
120000	2006	122006	天津市	0.03	7.96	1.17154	0.413077	3.57382	0.49	42014	2100000	5000000	602	0.34	0.124594	0.767872	0.236849	0.09	0.112976	0.006381	0.022525	0.028072	0.000834	13266.2	236.5	1	1	1	0.3042		1.32662
120000	2007	122007	天津市	0.03	8.16	1.29571	0.527776	3.71136	0.46	50462	2900000	5200000	738	0.4	0.133519	0.80145	0.240903	0.03	0.116574	0.021113	0.013267	0.033212	0.001167	15062.4	237.34	1	1	1	0.3584	0.6018	1.50624
120000	2008	122008	天津市	0.07	8.24	1.21005	0.741978	3.86437	0.49	54260	3300000	5400000	817	0.47	0.136555	0.77861	0.249977	0.03	0.134828	0.043126	0.025774	0.065998	0.002902	17725.6	235.01	1	1	1	0.3851	0.7004	1.77256
120000	2009	122009	天津市	0.14	8.33	1.48264	0.901985	4.05968	0.46	42744	3600000	5700000	993	0.55	0.149468	0.731129	0.266536	0.07	0.137116	0.113946	0.028382	0.141568	0.00076	19370.7	242.56	1	1	1	0.5048	0.55374	1.93707
120000	2010	122010	天津市	0.29	8.37	1.49322	1.1	4.29224	0.49	40368	4100000	5900000	1090	0.64	0.14926	0.776277	0.287147	0.14	0.163728	0.206966	0.084182	0.285143	0.006005	21799.8	243.37	1	1	1	0.6539	0.61175	2.17998
120000	2011	122011	天津市	0.34	8.47	1.31753	1.3	4.49702	0.46	43428	1600000	6200000	1235	0.75	0.158865	0.810056	0.297962	0.29	0.173571	0.228648	0.113624	0.340829	0.001444	24158.4	243.75	1	1	1	0.9317	1.06054	2.41584
120000	2012	122012	天津市	0.14	8.45	1.34886	1.5	4.73114	0.49	46475	1600000	6500000	1303	0.86	0.166219	0.821207	0.324323	0.34	0.208124	0.065058	0.071993	0.129497	0.007555	26586.3	244.66	1	1	1	1.1816		2.65863
120000	2013	122013	天津市	0.11	8.42	1.35373	1.7	4.89919	0.46	50322	1700000	6800000	1323	1	0.177396	0.815576	0.334682	0.14	0.215002	0.078333	0.036003	0.110362	0.003973	28979.8	245.74	1	1	1	1.4606		2.89798
120000	2014	122014	天津市	0.25	8.53	1.38082	1.9	5.05795	0.49	49751	2100000	7100000	1352	1.1	0.183424	0.828631	0.361792	0.11	0.252086	0.176118	0.070245	0.23728	0.009083	31506	247.06	1	1	1	1.6438	1.52717	3.1506
120000	2015	122015	天津市	0.25	8.62	1.48147	2.1	5.12854	0.46	49486	2600000	7400000	1406	1.3	0.195448	0.82513	0.36551	0.25	0.245713	0.208053	0.04089	0.235396	0.014	34101.4	249.87	1	1	1	2.2166	1.70587	3.41014
120000	2016	122016	天津市	0.15	8.65	1.53019	3.1	5.13842	0.49	49640	4000000	7700000	1500	1.5	0.206841	0.736194	0.380596	0.25	0.257018	0.082509	0.071965	0.142423	0.012	37109.6	254.21	1	1	1	2.615	1.88109	3.71096
120000	2017	122017	天津市	0.12	8.67	1.62288	1.1	5.14669	0.46	49550	3000000	8100000	1580	1.7	0.176875	0.704113	0.383891	0.15	0.250706	0.05624	0.064786	0.110441	0.011	40277.5	256.24	1	1	1	2.6225	2.07693	4.02775
120000	2018	122018	天津市	0.23	8.68	1.72993	0.485104	5.23349	0.49	49602	1500000	8600000	1680	2	0.16505	0.678424	0.385505	0.12	0.248332	0.139272	0.090498	0.216554	0.013	42976.3	256.7	1	1	1	2.9136	2.2651	4.29763
120000	2019	122019	天津市	0.16	8.68	2.47263	0.473161	5.4775	0.46	49572	1400000	8800000	1705	2.2	0.248774	0.686933	0.378622	0.23	0.238176	0.098516	0.059045	0.144244	0.013	46118.9	261.15	1	1	1	3.0232	2.44974	4.61189
120000	2020	122020	天津市	0.18	8.69	2.67612	0.396582	5.72152	0.49	49590	1500000	9200000	1725	2.5	0.223754	0.61025	0.383451	0.16	0.232729	0.087956	0.093161	0.166122	0.015	47658.5	261.88	1	1	1	3.4881	1.4124	4.76585
120000	2021	122021	天津市	0.03	8.69	2.55135	0.342367	5.83353	0.46	49580	1500000	9600000	1745	2.8	0.200863	0.679152	0.389342	0.18	0.245343	0.009499	0.018602	0.020679	0.007423	51485.7	258.81	1	1	1	2.879	1.78943	5.14857
120000	2022	122022	天津市	0.03	8.69	2.55351	0.302926	5.94505	0.49	49585	1600000	10000000	1810	3.2	0.167361	0.676484	0.389756	0.03	0.238873	0.00903	0.024983	0.030496	0.003517	53003	258.61	1	1	1	2.4755	1.12117	5.3003
120000	2023	122023	天津市	0.23	8.69	2.60893	0.273576	5.96569	0.46	49582	1700000	11000000	1908	3.6	0.195998	0.618064	0.40214	0.03	0.250058	0.021452	0.213407	0.224183	0.011	55354.5	260.03	1	1	1	2.6102	2.36	5.53545
130100	2003	132103	石家庄市	0	5.75	0.999633	0.025414	1.86344	0.03	10008	464557	2300000	216	0.05	0.058223	0.615038	0.151327		0.0380296	0.002535	0.002418	0.00383	0.001123	7740.48	223.48	1	1	1	0.038	0.1115	0.774048
130100	2004	132104	石家庄市	0	5.79	0.902877	0.035199	2.14537	0.03	11751	482270	2400000	259	0.06	0.056915	0.604124	0.148915	0	0.0389246	0.000418	0.000456	0.000828	4.6e-05	8628.02	222.18	1	1	1	0.0348	0.1441	0.862802
130100	2005	132105	石家庄市	0.02	5.85	0.873648	0.043931	2.68128	0.03	11942	639668	2500000	337	0.06	0.060535	0.609079	0.138217	0	0.0399121	0.004651	0.011241	0.015704	0.000187	10039.8	222.84	1	1	1	0.0478	0.1607	1.00398
130100	2006	132106	石家庄市	0.03	5.93	0.854382	0.049379	2.92617	0.04	12142	459600	2600000	376	0.06	0.06328	0.603321	0.145174	0.02	0.0425061	0.00114	0.024411	0.02544	0.00011	11495.1	225.23	1	1	1	0.051	0.1753	1.14951
130100	2007	132107	石家庄市	0.01	6.03	0.779155	0.032716	3.16796	0.04	12615	617304	2700000	506	0.07	0.069118	0.587562	0.158504	0.03	0.0488154	0.004567	0.001417	0.003609	0.002375	13204.9	226.11	1	1	1	0.0631	0.190176	1.32049
130100	2008	132108	石家庄市	0.02	6.1	0.732791	0.044028	3.2166	0.05	12513	557011	2900000	550	0.08	0.068274	0.567823	0.163791	0.01	0.0526732	0.004828	0.017898	0.021331	0.001395	15061.5	226.99	1	1	1	0.0863	0.17163	1.50615
130100	2009	132109	石家庄市	0.03	6.17	0.96178	0.05435	3.66531	0.05	15151	607441	3000000	612	0.09	0.080271	0.522841	0.176469	0.02	0.0559757	0.00279	0.024442	0.02584	0.001393	16606.8	228.88	1	1	1	0.1154	0.19734	1.66068
130100	2010	132110	石家庄市	0.11	6.24	0.962094	0.024415	3.72921	0.06	19689	639697	3200000	694	0.09	0.089727	0.536203	0.179522	0.03	0.0605568	0.01652	0.090674	0.101072	0.006123	18289.9	228.66	1	1	1	0.1367	0.23505	1.82899
130100	2011	132111	石家庄市	0.05	6.29	0.896417	0.036726	3.88241	0.06	24273	722164	3300000	808	0.1	0.098841	0.548222	0.185624	0.11	0.0662986	0.00286	0.042759	0.045443	0.000177	20534	228.91	1	1	1	0.1684	0.3247	2.0534
130100	2012	132112	石家庄市	0.06	6.34	0.887751	0.084811	3.95542	0.07	28755	837647	3500000	895	0.11	0.103127	0.586685	0.200187	0.05	0.0755692	0.011441	0.047514	0.058106	0.000849	23038.5	229.11	1	1	1	0.2178	0.41852	2.30385
130100	2013	132113	石家庄市	0.07	6.33	0.9277	0.09805	3.99055	0.08	35893	869830	3700000	979	0.12	0.107521	0.602594	0.213371	0.06	0.0777324	0.00757	0.063976	0.068499	0.003046	23994	230.39	1	1	1	0.2503	0.48743	2.3994
130100	2014	132114	石家庄市	0.08	7.82	0.986201	0.102189	3.93559	0.09	25938	856924	3900000	1038	0.13	0.109566	0.606323	0.218404	0.07	0.0843757	0.007428	0.076595	0.082672	0.00135	25996.3	233.38	1	1	1	0.3138	0.57786	2.59963
130100	2015	132115	石家庄市	0.09	7.88	0.941827	0.114013	4.19787	0.1	27516	835497	4100000	1071	0.15	0.125425	0.54962	0.234071	0.08	0.0856544	0.003598	0.085887	0.088686	0.0008	28168.3	235.77	1	1	1	0.4187	0.67634	2.81683
130100	2016	132116	石家庄市	0.06	7.79	0.873166	0.122102	4.41812	0.11	29190	867303	4400000	1170	0.16	0.125869	0.55048	0.244487	0.09	0.0921481	0.008423	0.052754	0.058782	0.002395	30459.3	237.33	1	1	1	0.5027	0.76284	3.04593
130100	2017	132117	石家庄市	0.05	7.7	1.44487	0.139458	4.60695	0.13	30966	869762	4700000	1265	0.17	0.130601	0.571306	0.260176	0.06	0.0968377	0.016499	0.032439	0.046605	0.002333	32929	242.455	1	1	1	0.585	0.921642	3.2929
130100	2018	132118	石家庄市	0.08	7.63	1.65966	0.149993	4.96882	0.14	32849	873512	5000000	1376	0.19	0.163024	0.524073	0.27639	0.05	0.10296	0.02831	0.05459	0.080017	0.002883	35563	247.58	1	1	1	0.7674	1.10378	3.5563
130100	2019	132119	石家庄市	0.11	7.56	1.95213	0.163351	5.3307	0.16	34847	810957	5500000	1403	0.21	0.180962	0.541311	0.280391	0.08	0.100555	0.035387	0.077174	0.109798	0.002763	38550.2	252.02	1	1	1	0.984	1.26668	3.85502
130100	2020	132120	石家庄市	0.08	7.5	2.20308	0.175802	5.83472	0.17	36965	877682	5700000	1416	0.22	0.192456	0.553474	0.290169	0.11	0.105838	0.005269	0.072205	0.075651	0.001823	40246.6	252.78	1	1	1	1.2102	0.657715	4.02466
130100	2021	132121	石家庄市	0.02	7.45	2.24633	0.188031	6.23891	0.19	39213	944407	5900000	1428	0.24	0.177619	0.591075	0.287881	0.08	0.109437	0.012121	0.003169	0.014789	0.000501	43023.6	250.97	1	1	1	1.0967	0.670966	4.30236
130100	2022	132122	石家庄市	0.03	7.4	2.27256	0.199969	6.53918	0.21	41597	1000000	6200000	1450	0.27	0.176092	0.553539	0.289933	0.02	0.114031	0.019007	0.012436	0.02104	0.01	44745	250.41	1	1	1	1.0527	0.57549	4.4745
130100	2023	132123	石家庄市	0.06	7.36	2.40072	0.211561	6.82079	0.23	44125	1100000	6400000	1493	0.29	0.169211	0.578816	0.30058	0.03	0.118997	0.015876	0.042191	0.038005	0.02	47564	253.03	1	1	1	1.136	1.27565	4.7564
130200	2003	132203	唐山市	0	5.24	0.554022	0.020198	0.79464	0.06	13630	233442	4700000	166	0.06	0.056354	0.567504	0.127051		0.0372105	2.5e-05	0.000209	0.000202	3.1e-05	8068	213.88	0	1	1	0.0151	0.03377	0.8068
130200	2004	132204	唐山市	0	5.27	0.492823	0.04134	0.64054	0.06	13916	282338	4800000	224	0.08	0.059986	0.595821	0.129916	0	0.0393453	0.000134	0.001371	0.001404	0.000101	8901.78	216.5	0	1	1	0.0204	0.051	0.890178
130200	2005	132205	唐山市	0	5.3	0.411778	0.050411	0.71961	0.06	14641	323772	4900000	269	0.1	0.063022	0.60737	0.134116	0	0.0422187	2e-05	0.000317	3.1e-05	0.000306	10487.9	218.41	0	1	1	0.0262	0.0565	1.04879
130200	2006	132206	唐山市	0.02	5.34	0.439621	0.05067	0.79337	0.06	15006	369151	5100000	296	0.12	0.064154	0.616178	0.137095	0	0.0447062	0.00811	0.011183	0.019192	0.000101	12375.8	219.3	0	1	1	0.0286	0.0685	1.23758
130200	2007	132207	唐山市	0	5.38	0.452223	0.06423	0.82641	0.06	14942	399978	5200000	351	0.13	0.069419	0.617838	0.152303	0.02	0.0521236	4.8e-05	0.001876	0.00035	0.001573	14235	220.91	0	1	1	0.0326	0.0762	1.4235
130200	2008	132208	唐山市	0	5.41	0.436397	0.083619	0.90954	0.06	21862	427268	5400000	544	0.18	0.072179	0.580709	0.15638	0	0.0569863	0.000326	0.001907	0.002171	6.2e-05	16381.9	220.56	0	1	1	0.0462	0.0957	1.63819
130200	2009	132209	唐山市	0.01	5.45	0.576321	0.079275	0.91138	0.06	25187	465526	5600000	474	0.21	0.074951	0.593896	0.16266	0	0.0599438	9e-06	0.009003	0.007799	0.001213	18052.9	222.37	0	1	1	0.0597	0.1226	1.80529
130200	2010	132210	唐山市	0.04	5.46	0.607745	0.087409	0.97638	0.06	29829	511665	5800000	501	0.25	0.074384	0.589116	0.173047	0.01	0.0665941	0.006823	0.034262	0.041011	7.4e-05	19555.7	221.98	0	1	1	0.0896	0.153235	1.95557
130200	2011	132211	唐山市	0.05	5.47	0.567481	0.108123	1.0587	0.06	37081	551272	6000000	844	0.3	0.081155	0.578613	0.180688	0.04	0.0748403	7.5e-05	0.045442	0.045517	3e-05	21785.2	221.04	0	1	1	0.1056	0.200095	2.17852
130200	2012	132212	唐山市	0.02	5.51	0.601745	0.123024	1.25531	0.06	41649	597244	6200000	848	0.36	0.083648	0.614083	0.212505	0.05	0.0885467	0.000612	0.016495	0.016011	0.001096	24357.7	221.7	0	1	1	0.1595	0.2454	2.43577
130200	2013	132213	唐山市	0.02	5.38	0.647541	0.135178	1.11758	0.06	47879	631975	6400000	805	0.43	0.081222	0.640444	0.228236	0.02	0.0919339	0.000125	0.024255	0.023963	0.000417	26703.5	222.24	0	1	1	0.1429	0.277031	2.67035
130200	2014	132214	唐山市	0.04	5.59	0.687285	0.140687	1.10646	0.06	38207	592559	6700000	734	0.51	0.084278	0.61707	0.228529	0.02	0.0944722	0.007074	0.033272	0.038363	0.001982	28890.9	223.28	0	1	1	0.1907	0.302	2.88909
130200	2015	132215	唐山市	0.03	5.6	0.783122	0.124376	1.11421	0.06	39678	529455	7000000	891	0.6	0.097043	0.565594	0.234345	0.04	0.0940917	0.001322	0.032799	0.03322	0.000902	31271.5	225.23	0	1	1	0.2428	0.339893	3.12715
130200	2016	132216	唐山市	0.03	5.62	0.782864	0.148301	1.15879	0.06	41205	546578	7300000	955	0.71	0.10111	0.552603	0.239281	0.03	0.0973524	0.000239	0.028036	0.027633	0.000642	33725.1	225.07	0	1	1	0.3186	0.446905	3.37251
130200	2017	132217	唐山市	0.03	5.61	0.798277	0.160669	1.23287	0.08	42789	551276	7600000	954	0.83	0.101473	0.573996	0.239313	0.03	0.0996244	0.00187	0.031473	0.031721	0.001621	36415.1	227.5	0	1	1	0.429	0.559131	3.64151
130200	2018	132218	唐山市	0.09	5.62	0.795373	0.170068	1.33291	0.11	44434	532489	8000000	1002	0.98	0.107734	0.577127	0.254776	0.03	0.10706	0.000497	0.087738	0.083333	0.004901	39364.8	229.93	0	1	1	0.5601	0.665206	3.93648
130200	2019	132219	唐山市	0.1	5.61	0.883135	0.180386	1.46262	0.13	46141	523089	8600000	974	1.1	0.115749	0.583503	0.260073	0.09	0.107118	0.028232	0.067733	0.093007	0.002958	42632	231.14	0	1	1	0.7161	0.785248	4.2632
130200	2020	132220	唐山市	0.09	5.62	0.961897	0.191138	1.65707	0.13	47913	545125	8900000	970	1.3	0.12845	0.547475	0.26469	0.1	0.112201	0.05051	0.04158	0.087615	0.004475	44337.4	229.35	0	1	1	0.8792	0.423827	4.43374
130200	2021	132221	唐山市	0.01	5.61	0.941332	0.201947	1.77703	0.13	49751	567161	9100000	967	1.6	0.11195	0.599813	0.281129	0.09	0.121961	0.002089	0.008522	0.007925	0.002686	47263.7	228.99	0	1	1	0.8394	0.508782	4.72637
130200	2022	132222	唐山市	0.01	5.61	0.999802	0.212782	1.82422	0.13	51659	604611	9400000	970	1.8	0.105258	0.579204	0.289834	0.01	0.126155	0.000948	0.004465	0.004291	0.001122	49154	229.27	0	1	1	0.7429	0.45563	4.9154
130200	2023	132223	唐山市	0	5.61	1.11552	0.223614	2.17862	0.13	53640	645454	9600000	966	2.1	0.109661	0.580544	0.303575	0.01	0.129209	0.001152	0.002167	0.002598	0.000721	52497	233.61	0	1	1	0.8478		5.2497
130300	2003	132303	秦皇岛市	0	3.63	0.827316	0.015443	0.55562	0.02	5442	104473	970833	84	0.01	0.078569	0.529658	0.153083		0.0227712	0.00018	0.00271	0.002869	2.2e-05	8031.72	239.24	0	1	1	0.0105	0.05923	0.803172
130300	2004	132304	秦皇岛市	0	3.67	0.773435	0.020164	0.56275	0.02	6643	118698	994360	115	0.02	0.075608	0.555132	0.149075	0	0.0227453	0	5.7e-05	4.4e-05	1.4e-05	8525.8	236.75	0	1	1	0.0104	0.1212	0.85258
130300	2005	132305	秦皇岛市	0.03	3.7	0.747937	0.023679	0.72688	0.02	7576	134299	1000000	116	0.02	0.089754	0.58499	0.152254	0	0.0242094	3e-07	0.026607	0.026355	0.000252	9802.39	239.36	0	1	1	0.0112	0.1302	0.980239
130300	2006	132306	秦皇岛市	0.01	3.73	0.794829	0.026634	0.78388	0.02	7795	133105	1000000	119	0.03	0.100384	0.586928	0.15581	0.03	0.0255269	5.3e-05	0.010815	0.010853	1.5e-05	10774.5	240.16	0	1	1	0.0176	0.1409	1.07745
130300	2007	132307	秦皇岛市	0.01	3.77	0.748935	0.034011	0.81363	0.02	7191	172358	1100000	137	0.03	0.105832	0.575676	0.17407	0.01	0.033069	1e-06	0.010134	0.008993	0.001142	12365.2	237.29	0	1	1	0.018	0.151	1.23652
130300	2008	132308	秦皇岛市	0.01	3.8	0.675909	0.04013	0.78267	0.02	7573	174590	1100000	152	0.05	0.116431	0.516844	0.167821	0.01	0.0325452	0.000184	0.008919	0.009103	0.004353	14080.5	235.91	0	1	1	0.0229	0.1227	1.40805
130300	2009	132309	秦皇岛市	0.01	3.82	0.907873	0.045713	0.88235	0.02	6007	202199	1100000	201	0.05	0.128917	0.543132	0.172778	0.01	0.0344487	5.2e-06	0.01121	0.011213	2e-06	15498.8	234.79	0	1	1	0.0376	0.1638	1.54988
130300	2010	132310	秦皇岛市	0.04	3.83	0.962947	0.049706	0.87946	0.02	6459	214026	1200000	241	0.06	0.145884	0.530556	0.179386	0.01	0.0387221	2.7e-05	0.038004	0.037683	0.000348	17202.8	232.26	0	1	1	0.0377	0.1861	1.72028
130300	2011	132311	秦皇岛市	0.02	3.71	0.971337	0.060195	0.89818	0.02	6819	237906	1200000	321	0.07	0.157576	0.513845	0.187014	0.04	0.042494	5.6e-06	0.020416	0.020422	0.000395	19552	233.64	0	1	1	0.0422	0.2101	1.9552
130300	2012	132312	秦皇岛市	0.01	3.73	1.03591	0.062795	1.55553	0.02	7170	258384	1200000	293	0.07	0.175513	0.543382	0.201812	0.02	0.0526583	5e-05	0.008645	0.008695	0.002759	22098.4	232.95	0	1	1	0.0689	0.2313	2.20984
130300	2013	132313	秦皇岛市	0.02	3.75	1.11839	0.073825	1.69925	0.02	7835	279198	1300000	343	0.08	0.171393	0.546649	0.211209	0.01	0.054388	1.5e-05	0.019965	0.019769	0.000211	24021.3	231.34	0	1	1	0.0702	0.2565	2.40213
130300	2014	132314	秦皇岛市	0	3.78	1.26266	0.081211	1.5502	0.02	7611	266378	1300000	326	0.09	0.176632	0.536219	0.224309	0.02	0.0594268	0.003471	0.001324	0.004067	0.000727	26052.6	232.46	0	1	1	0.0714	0.2796	2.60526
130300	2015	132315	秦皇岛市	0.04	3.79	1.1999	0.086122	1.55192	0.02	7220	239557	1400000	344	0.1	0.182573	0.500935	0.232206	0	0.0593161	0.000161	0.041337	0.041292	0.000206	28157.7	234.99	0	1	1	0.1028	0.3344	2.81577
130300	2016	132316	秦皇岛市	0	3.8	1.13125	0.090438	1.54101	0.02	7596	243009	1400000	356	0.12	0.181992	0.472402	0.240673	0.04	0.0654079	0.001262	0.001037	0.001462	0.000837	30347.8	235.23	0	1	1	0.1478	0.4189	3.03478
130300	2017	132317	秦皇岛市	0.01	3.8	1.13271	0.102197	1.53914	0.02	7234	239792	1500000	401	0.13	0.175093	0.451287	0.243758	0	0.0657032	0.000133	0.006261	0.006243	0.000151	32795	238.115	0	1	1	0.1523	0.52235	3.2795
130300	2018	132318	秦皇岛市	0.03	3.8	1.1828	0.110865	1.51259	0.02	7582	233104	1500000	413	0.15	0.178072	0.458144	0.252515	0.01	0.0689989	0.000122	0.027885	0.02771	0.000296	35386.3	241	0	1	1	0.1898	0.6218	3.53863
130300	2019	132319	秦皇岛市	0.02	3.81	1.36847	0.120036	0.94673	0.02	7247	222656	1500000	407	0.17	0.197234	0.453342	0.25114	0.03	0.067187	0.000665	0.018424	0.017545	0.001544	38358.6	240.51	0	1	1	0.2201	0.722767	3.83586
130300	2020	132320	秦皇岛市	0.03	3.81	1.4564	0.132889	0.96893	0.02	7568	230579	1600000	396	0.19	0.201828	0.465757	0.254672	0.02	0.0684941	0.001713	0.031905	0.033246	0.000372	39931.5	238.68	0	1	1	0.2195	0.268011	3.99315
130300	2021	132321	秦皇岛市	0	3.81	1.45786	0.147111	0.96864	0.02	7259	238502	1700000	385	0.21	0.168608	0.5539	0.258425	0.03	0.0720031	0.000201	0.003419	0.003209	0.000411	42566.7	237.36	0	1	1	0.2357	0.312293	4.25667
130300	2022	132322	秦皇岛市	0	3.81	1.55458	0.16285	0.95558	0.02	7556	254401	1900000	388	0.24	0.165502	0.54375	0.262731	0	0.0732611	0.000115	0.000393	0.000255	0.000253	44142	236.92	0	1	1	0.21	0.188578	4.4142
130300	2023	132323	秦皇岛市	0	3.81	1.65544	0.180265	1.4354	0.02	7270	252120	2000000	386	0.27	0.188981	0.456249	0.280525	0	0.0772797	0.001213	0.002775	0.002511	0.001477	46525	240.99	0	1	1	0.1884		4.6525
130400	2003	132403	邯郸市	0	7.11	0.716872	0.008528	0.41536	0.03	9706	151613	1300000	100	0.03	0.063363	0.555402	0.106341		0.0264956	0.000166	2e-06	8.3e-05	8.5e-05	6842.04	218.23	0	1	1	0.0105	0.0401	0.684204
130400	2004	132404	邯郸市	0	7.16	0.634391	0.013451	0.43489	0.03	10505	344029	1400000	141	0.04	0.067988	0.534804	0.107937	0	0.0274511	0.001406	0.001309	0.002714	3e-07	7706.08	220.15	0	1	1	0.0087	0.0762	0.770608
130400	2005	132405	邯郸市	0	7.22	0.559548	0.015244	0.4683	0.03	10673	421335	1500000	188	0.04	0.072449	0.51542	0.113191	0	0.0292536	0	0.004859	0.000568	0.004292	9232.58	221.38	0	1	1	0.0116	0.0768	0.923258
130400	2006	132406	邯郸市	0.02	7.33	0.554598	0.017354	0.51189	0.03	11649	236208	1500000	215	0.05	0.08059	0.482058	0.120714	0	0.0309636	1.6e-06	0.0154	0.009298	0.006104	10503.3	221.48	0	1	1	0.0156	0.085	1.05033
130400	2007	132407	邯郸市	0.01	7.43	0.497609	0.016617	0.54724	0.03	12616	266655	1600000	278	0.07	0.081031	0.533032	0.127834	0.02	0.0353851	0	0.006022	0.006006	1.7e-05	12583.5	220.46	0	1	1	0.014	0.0938	1.25835
130400	2008	132408	邯郸市	0.01	7.69	0.428114	0.025367	0.57218	0.03	17403	266584	1700000	371	0.09	0.077871	0.499762	0.135017	0.01	0.0377656	0.007986	0.000625	0.004257	6.7e-06	14457.4	220.75	0	1	1	0.0134	0.1018	1.44574
130400	2009	132409	邯郸市	0.03	7.82	0.562489	0.033236	0.59246	0.03	19135	298421	1900000	399	0.11	0.098112	0.440901	0.140083	0.01	0.0393773	0.002588	0.030325	0.031449	0.001464	15961	220.61	0	1	1	0.0233	0.1186	1.5961
130400	2010	132410	邯郸市	0.03	7.99	0.558418	0.049191	0.60899	0.03	25506	333593	2000000	456	0.14	0.111729	0.439247	0.140937	0.03	0.0414537	0.008409	0.024672	0.028867	0.004213	17561.6	218.71	0	1	1	0.0302	0.1481	1.75616
130400	2011	132411	邯郸市	0.03	8.12	0.550399	0.065546	0.62027	0.03	29266	366651	2100000	538	0.17	0.11783	0.483675	0.146612	0.03	0.0453121	1e-05	0.026	0.02598	6.1e-05	19321.7	219.09	0	1	1	0.0415	0.172	1.93217
130400	2012	132412	邯郸市	0.02	8.23	0.608793	0.08002	0.61728	0.03	34384	416976	2300000	621	0.21	0.125511	0.486457	0.165442	0.03	0.0548522	0.005286	0.010711	0.013238	0.000586	21740	220	0	1	1	0.0754	0.23	2.174
130400	2013	132413	邯郸市	0.01	8.24	0.684297	0.088377	0.8418	0.03	36956	457295	2500000	652	0.25	0.119919	0.470268	0.17007	0.02	0.0533522	0.000988	0.01323	0.01356	0.000658	20661.6	221.86	0	1	1	0.0778	0.276115	2.06616
130400	2014	132414	邯郸市	0.04	8.53	0.767803	0.09254	0.58793	0.03	37209	455411	2800000	717	0.3	0.131387	0.452617	0.176248	0.01	0.0570695	0.003183	0.031372	0.033052	0.001503	22699.1	222.71	0	1	1	0.0848	0.30097	2.26991
130400	2015	132415	邯郸市	0.02	8.7	0.891373	0.082027	0.58496	0.03	38507	435850	3000000	711	0.36	0.16393	0.369687	0.18427	0.04	0.0561961	0.000701	0.023627	0.023845	0.000483	24630.2	226.22	0	1	1	0.1291	0.3633	2.46302
130400	2016	132416	邯郸市	0.03	8.7	0.937717	0.102156	0.57383	0.03	39529	454865	3400000	805	0.43	0.159313	0.384662	0.191509	0.02	0.0587487	0.000267	0.027488	0.027753	2.6e-06	26602.5	226.76	0	1	1	0.1248	0.47342	2.66025
130400	2017	132417	邯郸市	0.03	8.7	1.04932	0.109238	0.60299	0.03	40329	460398	3700000	867	0.51	0.161859	0.402399	0.192272	0.03	0.0598524	0.000433	0.025744	0.025133	0.001044	28773.8	231.26	0	1	1	0.1506	0.585314	2.87738
130400	2018	132418	邯郸市	0.03	8.7	1.05987	0.11146	0.65427	0.03	40951	441285	4100000	958	0.6	0.181209	0.388813	0.203613	0.03	0.0626583	0.003909	0.022032	0.024865	0.001077	31133	235.76	0	1	1	0.1755	0.698601	3.1133
130400	2019	132419	邯郸市	0.05	8.7	1.19228	0.119178	0.722	0.06	41432	444174	4300000	986	0.7	0.200002	0.375883	0.206115	0.03	0.0624966	0.003136	0.044793	0.046963	0.000966	33904	234.77	0	1	1	0.2171	0.802804	3.3904
130400	2020	132420	邯郸市	0.04	8.7	1.34982	0.12071	0.79305	0.08	41804	469380	4400000	992	0.82	0.217002	0.364679	0.211239	0.05	0.0653932	0.000129	0.040662	0.038541	0.00225	35497.5	235.07	0	1	1	0.3106	0.400456	3.54975
130400	2021	132421	邯郸市	0	8.7	1.39598	0.119326	0.82779	0.09	42091	494586	4600000	997	0.95	0.182359	0.418527	0.21271	0.04	0.0688298	0.00068	0.002108	0.001785	0.001003	38124.1	233.5	0	1	1	0.2694	0.508679	3.81241
130400	2022	132422	邯郸市	0	8.7	1.55126	0.120575	0.83432	0.1	42311	528584	4800000	1009	1.1	0.194574	0.420098	0.223476	0	0.0737651	0.000434	0.001892	0.001597	0.000729	39687	233.84	0	1	1	0.2424	0.330754	3.9687
130400	2023	132423	邯郸市	0	8.7	1.77148	0.119447	0.86906	0.1	42480	561163	5000000	1010	1.3	0.198916	0.431396	0.235779	0	0.0768777	0.002093	0.000712	0.001946	0.000859	42267	237.24	0	1	1	0.2936		4.2267
130500	2003	132503	邢台市	0	5.35	0.68418	0.005784	0.22374	0.02	3805	118444	885115	93	0.02	0.069389	0.752674	0.090574		0.019243	2e-05	0	2e-05	0.000585	6124.68	207.38	0	1	1	0.0078	0.01426	0.612468
130500	2004	132504	邢台市	0.01	5.38	0.607935	0.010729	0.2872	0	3828	265949	949516	106	0.02	0.064762	0.437318	0.08709	0	0.0194458	0.005751	0.000236	0.005986	8e-07	6695.35	206.49	0	1	1	0.0069	0.0276	0.669535
130500	2005	132505	邢台市	0	5.41	0.548064	0.014178	0.33641	0.02	3826	159174	1000000	133	0.02	0.076205	0.421227	0.085405	0.01	0.0197631	0.001503	0.000516	0.000517	0.001502	7752.34	205.18	0	1	1	0.0111	0.0325	0.775234
130500	2006	132506	邢台市	0.01	5.47	0.534809	0.016361	0.36429	0	4499	178784	1100000	157	0.03	0.086044	0.37482	0.092849	0	0.0215687	0.009512	0.000523	0.006971	0.003064	9020.46	207.19	0	1	1	0.0124	0.042	0.902046
130500	2007	132507	邢台市	0	5.56	0.513067	0.015064	0.38737	0.02	4810	201255	1200000	199	0.04	0.093548	0.376286	0.102365	0.01	0.02427	0.002358	0.000628	0.002326	0.000661	10575.4	209.6	0	1	1	0.0101	0.04889	1.05754
130500	2008	132508	邢台市	0	5.68	0.477709	0.01952	0.43732	0	8472	204549	1300000	230	0.05	0.11094	0.336308	0.105225	0	0.0258491	0.001091	0.000685	0.001776	1.4e-05	12128.7	211.43	0	1	1	0.0131	0.05482	1.21287
130500	2009	132509	邢台市	0.02	5.76	0.627938	0.020424	0.45824	0.02	8544	231647	1400000	304	0.06	0.125563	0.324452	0.120841	0	0.0279734	6e-05	0.016301	0.015906	0.000455	13354.9	212.42	0	1	1	0.013	0.063207	1.33549
130500	2010	132510	邢台市	0.02	5.86	0.671668	0.025485	0.47109	0	10253	247795	1500000	346	0.07	0.142182	0.331325	0.123492	0.02	0.0293869	0	0.015195	0.015195	5.5e-07	14744.4	212.09	0	1	1	0.016	0.0754	1.47444
130500	2011	132511	邢台市	0.04	5.93	0.662662	0.00161	0.48378	0.02	12752	282920	1600000	377	0.09	0.15019	0.328858	0.129479	0.02	0.0323432	0.000595	0.036542	0.036742	0.000713	16592.3	212.83	0	1	1	0.0276	0.08543	1.65923
130500	2012	132512	邢台市	0.01	6.01	0.759787	0.009975	0.49455	0	14333	319508	1700000	404	0.1	0.16334	0.342109	0.155549	0.04	0.044498	9.5e-05	0.005543	0.005052	2.4e-05	18639.4	213.47	0	1	1	0.0417	0.1054	1.86394
130500	2013	132513	邢台市	0.02	6.14	0.858527	0.045976	0.47756	0.02	15425	351381	1800000	437	0.12	0.161535	0.346972	0.159466	0.01	0.0424153	0.005733	0.013139	0.013298	0.005573	18194.5	214.86	0	1	1	0.0564	0.119406	1.81945
130500	2014	132514	邢台市	0	6.22	0.939976	0.0486	0.46696	0	11614	341323	2000000	483	0.15	0.178891	0.324842	0.169627	0.02	0.0456465	0.000261	0.000336	0.000596	5e-07	20007.2	218.44	0	1	1	0.0523	0.13015	2.00072
130500	2015	132515	邢台市	0.02	6.27	0.996881	0.021968	0.47351	0.02	10798	330448	2100000	539	0.17	0.211744	0.472358	0.184616	0	0.0492928	0.000346	0.016449	0.016795	0.000288	21895.3	222.79	0	1	1	0.0893	0.1713	2.18953
130500	2016	132516	邢台市	0.03	6.36	1.0102	0.054422	0.48874	0	10393	350823	2300000	617	0.2	0.207206	0.27231	0.183723	0.02	0.0480686	0.011356	0.016118	0.017795	0.009679	23913.3	224.84	0	1	1	0.0997	0.210654	2.39133
130500	2017	132517	邢台市	0.01	6.44	1.11203	0.060349	0.52136	0.02	10186	357353	2500000	625	0.23	0.200191	0.302821	0.190926	0.03	0.0509935	0.004342	0.004916	0.004937	0.00432	26179.3	229.195	0	1	1	0.1117	0.262856	2.61793
130500	2018	132518	邢台市	0.04	6.52	1.28945	0.063764	0.51685	0	10079	376423	2800000	668	0.27	0.230075	0.301113	0.20397	0.01	0.0539343	0.002347	0.03551	0.035107	0.00275	28640.1	233.55	0	1	1	0.1333	0.305485	2.86401
130500	2019	132519	邢台市	0.03	6.61	1.51246	0.06853	0.56156	0.02	10023	347858	2900000	668	0.31	0.259658	0.290377	0.207054	0.04	0.0548065	0.004957	0.021187	0.021142	0.005003	31533	232.96	0	1	1	0.1611	0.354761	3.1533
130500	2020	132520	邢台市	0.03	6.69	1.73464	0.081848	0.60416	0	9993	365592	3100000	700	0.36	0.277714	0.287846	0.213876	0.03	0.0583414	0.002414	0.026345	0.026938	0.001821	33109.4	233.23	0	1	1	0.1981	0.240964	3.31094
130500	2021	132521	邢台市	0	6.78	1.79689	0.097739	0.71968	0.02	9978	383326	3400000	731	0.41	0.236109	0.332834	0.21563	0.03	0.0606143	0.001599	0.001097	0.001038	0.001657	35228	232.21	0	1	1	0.2283	0.308699	3.5228
130500	2022	132522	邢台市	0	6.86	1.94299	0.116696	0.7474	0	9970	406148	3600000	742	0.46	0.241428	0.340982	0.219321	0	0.0632781	0.000442	0.000547	0.000781	0.000207	36532	231.89	0	1	1	0.213	0.212264	3.6532
130500	2023	132523	邢台市	0	6.95	2.19848	0.139307	0.94508	0.02	9966	431684	3800000	749	0.53	0.248159	0.334124	0.231971	0	0.0664324	0.000896	0.001734	0.001548	0.001082	38395	235.81	0	1	1	0.2517		3.8395
130600	2003	132603	保定市	0	5.23	0.571735	0.026603	0.96964	0.08	5716	263228	1700000	196	0.03	0.064407	0.500061	0.105633		0.0258318	4.4e-06	0.003803	0.003222	9e-06	7434.72	219.17	0	1	1	0.0128	0.095	0.743472
130600	2004	132604	保定市	0	5.29	0.50403	0.022255	1.14497	0.08	6503	628073	1800000	264	0.03	0.06224	0.485976	0.105128	0	0.0268406	1.4e-05	0.001752	0.00167	9.6e-05	8259.59	217.95	0	1	1	0.0133	0.1542	0.825959
130600	2005	132605	保定市	0.01	5.31	0.493816	0.012919	1.20832	0.08	6888	349119	1800000	292	0.04	0.080318	0.432723	0.10181	0	0.0267096	0.000116	0.009801	0.009143	0.000773	9194.68	213.62	0	1	1	0.0148	0.1705	0.919468
130600	2006	132606	保定市	0	5.37	0.512004	0.017754	1.35161	0.08	7738	389703	1900000	363	0.05	0.086388	0.415394	0.108642	0.01	0.0281328	5.4e-05	0.000227	0.000213	6.8e-05	10097.6	215.38	0	1	1	0.0173	0.185	1.00976
130600	2007	132607	保定市	0.02	5.46	0.501336	0.017427	1.41002	0.08	8921	460431	2100000	425	0.05	0.095216	0.393192	0.120152	0	0.0331403	0.000577	0.017952	0.018132	0.000397	10924.7	217.98	0	1	1	0.0254	0.198038	1.09247
130600	2008	132608	保定市	0.02	5.55	0.448989	0.05342	1.49663	0.08	8772	466019	2200000	491	0.07	0.105181	0.400515	0.127203	0.02	0.0347669	0.000583	0.016517	0.017093	0.001356	12311.7	219.43	0	1	1	0.0339	0.1899	1.23117
130600	2009	132609	保定市	0.01	5.61	0.558701	0.042478	1.61624	0.08	11711	509675	2300000	553	0.08	0.115813	0.365629	0.130616	0.02	0.0359483	0.000703	0.013106	0.013707	0.000102	13554.9	217.96	0	1	1	0.0495	0.22781	1.35549
130600	2010	132610	保定市	0.02	5.64	0.564951	0.04745	1.6264	0.08	14788	529543	2400000	635	0.1	0.131154	0.338527	0.12769	0.01	0.0376285	0.000157	0.020135	0.020186	0.000106	15047.7	217.78	0	1	1	0.0627	0.28117	1.50477
130600	2011	132611	保定市	0.01	5.23	0.551993	0.044573	1.66282	0.08	18967	594034	2600000	742	0.12	0.13579	0.386533	0.128073	0.02	0.040843	9.7e-05	0.013713	0.013749	2.3e-05	16912.2	216.34	0	1	1	0.1256	0.33958	1.69122
130600	2012	132612	保定市	0.01	5.28	0.582533	0.055051	1.42124	0.08	22685	652895	2700000	790	0.14	0.140973	0.416946	0.147684	0.01	0.0510165	0.000751	0.009674	0.010401	0.000102	19047.7	216.22	0	1	1	0.1359	0.39895	1.90477
130600	2013	132613	保定市	0.02	5.57	0.647221	0.061991	2.59287	0.08	26879	714206	2900000	967	0.16	0.158532	0.391602	0.14519	0.01	0.0496186	2.4e-05	0.019024	0.018195	0.000854	19840	216.43	0	1	1	0.1807	0.474613	1.984
130600	2014	132614	保定市	0.02	5.39	0.741605	0.060585	1.6118	0.08	21726	695609	3000000	905	0.18	0.150762	0.420614	0.163237	0.02	0.0563028	0.000235	0.021351	0.021353	0.000233	21751	219.45	0	1	1	0.16	0.51733	2.1751
130600	2015	132615	保定市	0.03	5.42	0.863535	0.041592	1.74568	0.08	24319	669914	3200000	946	0.21	0.188912	0.375547	0.183326	0.02	0.05707	3.7e-05	0.033949	0.033698	0.000512	23662.7	225.42	0	1	1	0.1712	0.66344	2.36627
130600	2016	132616	保定市	0.02	5.48	0.88678	0.070346	2.15527	0.08	27221	707538	3400000	1023	0.24	0.176023	0.392285	0.191258	0.03	0.0593692	0.000463	0.022197	0.021619	0.001041	25679.7	224.59	0	1	1	0.2188	0.798344	2.56797
130600	2017	132617	保定市	0.01	5.54	1.06599	0.073226	1.71818	0.08	30468	729698	3600000	1079	0.27	0.192383	0.389371	0.195825	0.02	0.0619541	0.000666	0.012798	0.011554	0.00191	27859	229.16	0	1	1	0.3118	0.962982	2.7859
130600	2018	132618	保定市	0.04	5.59	1.19819	0.098154	1.78167	0.08	34103	766036	3800000	1176	0.3	0.292628	0.272602	0.209124	0.01	0.0658398	0.000978	0.037178	0.036645	0.001511	30283	233.73	0	1	1	0.3187	1.11553	3.0283
130600	2019	132619	保定市	0.04	5.64	1.34243	0.114843	1.89598	0.07	38169	679604	4000000	1173	0.33	0.232701	0.347329	0.225693	0.04	0.0685813	0.00243	0.037277	0.038755	0.000952	32705.3	240.55	0	1	1	0.4098	1.29253	3.27053
130600	2020	132620	保定市	0.05	5.69	1.49023	0.129005	2.01653	0.07	42720	735786	4300000	1228	0.37	0.31295	0.281938	0.237884	0.04	0.0744831	0.011425	0.033225	0.043319	0.001331	34111.6	240.73	0	1	1	0.4991	0.736229	3.41116
130600	2021	132621	保定市	0.01	5.73	1.60284	0.144646	2.0488	0.07	47812	791969	4600000	1282	0.41	0.289121	0.301514	0.238469	0.05	0.0795585	0.000428	0.00794	0.007388	0.000981	37313.7	238.77	0	1	1	0.6024	0.719152	3.73137
130600	2022	132622	保定市	0.04	5.77	1.92609	0.161889	2.16136	0.07	53510	879797	4900000	1294	0.44	0.195056	0.385572	0.240514	0.01	0.081544	0.007922	0.028985	0.026474	0.01	39179	237.73	0	1	1	0.5631	0.607529	3.9179
130600	2023	132623	保定市	0.02	5.81	1.59655	0.180864	1.93587	0.07	59885	922040	5200000	1288	0.48	0.294429	0.260434	0.254342	0.04	0.0875435	0.013068	0.009255	0.016789	0.005534	41334	240.82	0	1	1	0.5964		4.1334
130700	2003	132703	张家口市	0	1.22	0.906383	0.002183	0.25373	0.23	5730	96756	422536	72	0.01	0.117766	0.309405	0.121971		0.0221558	5.3e-05	0.000126	0.00017	8.9e-05	5688.04	224.22	0	1	1	0.0019	0.02741	0.568804
130700	2004	132704	张家口市	0.01	1.22	0.767808	0.003704	0.244	0.19	6195	195631	460581	77	0.02	0.131709	0.290008	0.117781	0	0.0227301	0.00028	0.009702	0.009947	3.5e-05	6520.49	221.25	0	1	1	0.0027	0.035	0.652049
130700	2005	132705	张家口市	0.01	1.22	0.777357	0.004481	0.29136	0.15	6520	144646	502261	116	0.02	0.141168	0.359712	0.123488	0.01	0.0235075	3.5e-06	0.009007	0.009007	3e-06	7714.18	221.88	0	1	1	0.0015	0.0441	0.771418
130700	2006	132706	张家口市	0	1.23	0.824194	0.003514	0.31295	0.12	6858	158690	547943	134	0.02	0.141714	0.353814	0.126402	0.01	0.0242918	9.5e-06	0.00097	0.000976	4e-06	8939.95	221.92	0	1	1	0.0023	0.053	0.893995
130700	2007	132707	张家口市	0.01	1.24	0.837099	0.004738	0.33742	0.1	7170	170146	598033	166	0.02	0.162887	0.373707	0.137522	0	0.029734	0.007814	0.000167	0.000471	0.007509	10050.7	223.62	0	1	1	0.0026	0.061299	1.00507
130700	2008	132708	张家口市	0.06	1.25	0.758268	0.006363	0.40981	0.08	5384	181601	652977	167	0.03	0.154212	0.3746	0.142418	0.01	0.0322502	0.00915	0.048518	0.057654	0.002004	12053.9	222.03	0	1	1	0.0026	0.0537	1.20539
130700	2009	132709	张家口市	0.07	1.25	0.977925	0.008053	0.44832	0.06	5199	201157	713274	206	0.03	0.193954	0.302747	0.159415	0.06	0.0353936	1.3e-05	0.073829	0.072558	0.001283	13246.2	226.83	0	1	1	0.0043	0.07025	1.32462
130700	2010	132710	张家口市	0.03	1.26	0.950221	0.010045	0.45043	0.05	6982	211616	779472	242	0.03	0.188047	0.343617	0.155674	0.07	0.0349319	0.000772	0.023852	0.024285	0.000339	14649.5	224.38	0	1	1	0.0036	0.10347	1.46495
130700	2011	132711	张家口市	0.05	1.27	0.950298	0.018681	0.45082	0.04	8872	262935	852180	266	0.04	0.206967	0.358451	0.156524	0.03	0.0368606	0.000301	0.044715	0.044303	1e-05	16401.3	222.59	0	1	1	0.0064	0.14952	1.64013
130700	2012	132712	张家口市	0.02	1.27	0.967047	0.02496	0.45501	0.03	9310	262835	932072	301	0.04	0.216093	0.399761	0.168125	0.05	0.0446859	0.000265	0.019884	0.020047	6e-08	18440.9	222.75	0	1	1	0.0115	0.20097	1.84409
130700	2013	132713	张家口市	0.02	1.27	1.01566	0.027685	0.15741	0.02	9780	279853	1000000	327	0.04	0.223858	0.40183	0.181245	0.02	0.0470642	0.000135	0.019132	0.018688	0.000579	19641.3	220.26	0	1	1	0.0128	0.253883	1.96413
130700	2014	132714	张家口市	0.03	1.27	1.10691	0.032518	0.46448	0.02	7122	269152	1100000	334	0.04	0.244418	0.381482	0.184576	0.02	0.0500913	0.000449	0.031675	0.030727	0.001398	21651.2	220.82	0	1	1	0.0204	0.27673	2.16512
130700	2015	132715	张家口市	0.04	1.27	1.23192	0.033262	0.67806	0.01	6791	251208	1200000	351	0.05	0.286211	0.341908	0.192395	0.03	0.0507877	8.3e-05	0.042082	0.041653	0.000342	23841.3	223.25	0	1	1	0.0275	0.38373	2.38413
130700	2016	132716	张家口市	0.01	1.28	1.38229	0.046003	0.17565	0.01	7046	261229	1300000	386	0.05	0.283216	0.341281	0.20339	0.04	0.0523099	0.000145	0.013909	0.007892	0.006163	26069.3	225.38	0	1	1	0.0342	0.51826	2.60693
130700	2017	132717	张家口市	0.03	1.28	1.68261	0.040965	0.53969	0.01	6847	269353	1500000	417	0.05	0.331164	0.28733	0.210094	0.01	0.0559261	0.000298	0.029435	0.029463	0.00027	28512.4	230.57	0	1	1	0.0442	0.624756	2.85124
130700	2018	132718	张家口市	0.04	1.29	1.8819	0.043955	0.58316	0	7001	269490	1700000	454	0.05	0.364603	0.280016	0.22492	0.03	0.0596604	0.000957	0.034469	0.03436	0.001066	31192.5	235.76	0	1	1	0.0552		3.11925
130700	2019	132719	张家口市	0.05	1.29	2.14131	0.046558	0.65764	0	6881	261880	1800000	440	0.06	0.393965	0.275962	0.232744	0.04	0.0593935	0.001262	0.048416	0.046325	0.003354	34062.3	238.87	0	1	1	0.068	0.859099	3.40623
130700	2020	132720	张家口市	0.03	1.29	2.37436	0.046551	0.74869	0	6974	292171	1900000	452	0.06	0.401921	0.272875	0.24246	0.05	0.0616097	0.002775	0.028531	0.029175	0.002131	35595	238.56	0	1	1	0.0947	0.245526	3.5595
130700	2021	132721	张家口市	0	1.3	2.44413	0.046551	0.80355	0	6902	322462	2100000	465	0.06	0.309798	0.348137	0.249251	0.03	0.0648102	0.000747	0.002019	0.001699	0.001067	38122.1	239.1	0	1	1	0.0827	0.431705	3.81221
130700	2022	132722	张家口市	0.01	1.3	2.60177	0.046551	0.80859	0	6958	361982	2300000	466	0.07	0.342962	0.275125	0.255083	0	0.0666047	0.00092	0.005462	0.00397	0.002412	39533	236.95	0	1	1	0.0786	0.306873	3.9533
130700	2023	132723	张家口市	0	1.3	2.79167	0.046551	0.80049	0	6915	385768	2400000	470	0.07	0.376562	0.259901	0.267156	0.01	0.0706571	0.001471	0.001588	0.001938	0.001121	41588	238.89	0	1	1	0.0895		4.1588
130800	2003	132803	承德市	0	0.91	0.871446	0.007509	0.19146	0.01	3181	44666	654277	50	0.01	0.124715	0.287003	0.107269		0.0183109	0	0.002453	0.002453	0.00055	7137.24	215.28	0	1	1	0.003	0.04106	0.713724
130800	2004	132804	承德市	0	0.91	0.767564	0.010081	0.2059	0.01	3240	138207	698232	70	0.01	0.125779	0.318092	0.104905	0	0.0186787	0	3e-05	5e-07	3e-05	7538.17	212.8	0	1	1	0.0017	0.0539	0.753817
130800	2005	132805	承德市	0	0.91	0.637402	0.011047	0.24094	0.01	3666	103155	745211	79	0.02	0.134672	0.356434	0.107568	0	0.0199892	0	0.000632	0.000627	5.3e-06	7844.61	211.56	0	1	1	0.003	0.0604	0.784461
130800	2006	132806	承德市	0	0.92	0.663319	0.001144	0.27385	0.01	4190	121700	795425	87	0.02	0.145284	0.393198	0.109867	0	0.0211666	2.2e-05	0.000651	0.000638	3.5e-05	8476.91	211.03	0	1	1	0.0031	0.0681	0.847691
130800	2007	132807	承德市	0.03	0.93	0.642821	0.00111	0.30911	0.01	4422	141560	849102	108	0.03	0.137384	0.429623	0.118986	0	0.0274796	5e-06	0.025424	0.025416	1.3e-05	10394.8	209.52	0	1	1	0.0031	0.080116	1.03948
130800	2008	132808	承德市	0.02	0.93	0.602468	0.005574	0.3336	0.01	4545	144773	906487	121	0.04	0.149424	0.353805	0.119726	0.03	0.0296925	0.000379	0.019003	0.019382	0.000273	12061.8	208.83	0	1	1	0.0033	0.07278	1.20618
130800	2009	132809	承德市	0.02	0.94	0.787513	0.006697	0.35532	0.01	4796	161691	967842	163	0.04	0.170668	0.348261	0.143842	0.02	0.0322613	3.6e-05	0.023515	0.023515	3.6e-05	13282.2	217.57	0	1	1	0.0049	0.10603	1.32822
130800	2010	132810	承德市	0.02	0.94	0.861956	0.006994	0.37774	0.01	5775	176204	1000000	185	0.05	0.175396	0.351688	0.140986	0.02	0.0328672	1e-05	0.019381	0.019274	0.000117	14667.5	216.6	0	1	1	0.0039	0.12856	1.46675
130800	2011	132811	承德市	0.01	0.95	0.772937	0.005695	0.40276	0.01	7121	193597	1100000	209	0.06	0.174206	0.369624	0.139983	0.02	0.0357406	5e-06	0.009148	0.009153	1e-06	16637.6	214.19	0	1	1	0.0052	0.16678	1.66376
130800	2012	132812	承德市	0	0.95	0.821747	0.013043	0.41258	0.01	8150	216095	1200000	239	0.07	0.199503	0.349934	0.161168	0.01	0.0449566	6e-05	0.000252	0.000312	2.9e-05	18706	214.75	0	1	1	0.0073	0.197606	1.8706
130800	2013	132813	承德市	0.01	0.95	0.87163	0.004137	0.41711	0.01	9154	227162	1300000	267	0.08	0.205767	0.391591	0.162234	0	0.0448411	0.000116	0.009208	0.009082	0.000241	18896.1	214.84	0	1	1	0.0066	0.16676	1.88961
130800	2014	132814	承德市	0.01	0.96	0.966038	0.01494	0.40567	0.01	7865	221472	1300000	285	0.1	0.189431	0.422933	0.168477	0.01	0.047588	0.000135	0.007717	0.007802	5e-05	20982.8	215.37	0	1	1	0.0102	0.197606	2.09828
130800	2015	132815	承德市	0.03	0.97	1.10099	0.015959	0.41144	0.01	8142	211022	1400000	281	0.11	0.215301	0.332488	0.184165	0.01	0.0482487	0.001	0.032263	0.032921	0.000122	22885.2	217.48	0	1	1	0.0112	0.331841	2.28852
130800	2016	132816	承德市	0.02	0.97	1.15167	0.020006	0.43063	0.01	8070	224260	1500000	319	0.13	0.211149	0.270394	0.194159	0.03	0.0504251	8e-05	0.015542	0.015582	4e-05	24856.5	220.15	0	1	1	0.0215	0.460412	2.48565
130800	2017	132817	承德市	0.02	0.97	1.30777	0.00377	0.44883	0.01	8088	216247	1600000	374	0.15	0.230398	0.264251	0.204723	0.02	0.0534217	0.001075	0.014038	0.014537	0.000576	27042	223.39	0	1	1	0.0288	0.576154	2.7042
130800	2018	132818	承德市	0.03	0.97	1.48754	0.020238	0.47571	0.01	8083	227246	1700000	372	0.17	0.254582	0.277207	0.215356	0.02	0.0559276	0.000105	0.024889	0.024464	0.00053	29556.9	226.63	0	1	1	0.0345	0.69726	2.95569
130800	2019	132819	承德市	0.03	0.97	1.67926	0.005456	0.53941	0.01	8085	219940	1900000	373	0.19	0.28676	0.266623	0.219121	0.03	0.0559897	0.000127	0.030754	0.028227	0.002654	32365	225.27	0	1	1	0.0461	0.795434	3.2365
130800	2020	132820	承德市	0.02	0.97	1.73988	0.007403	0.56226	0.01	8084	232356	2000000	386	0.22	0.289782	0.258563	0.224633	0.03	0.0589259	0.003669	0.0157	0.016242	0.003128	33918.3	223.51	0	1	1	0.063	0.280099	3.39183
130800	2021	132821	承德市	0	0.97	1.74361	0.007306	0.61246	0.01	8084	244771	2200000	399	0.25	0.248182	0.299188	0.2244	0.02	0.0604905	0.000333	0.002087	0.001769	0.000651	36767.2	220.92	0	1	1	0.0595	0.360512	3.67672
130800	2022	132822	承德市	0	0.97	1.7972	0.00731	0.59703	0.01	8084	262799	2300000	405	0.28	0.245146	0.28394	0.224978	0	0.0617154	0.000718	0.000359	0.000527	0.00055	38495	218.12	0	1	1	0.065	0.164864	3.8495
130800	2023	132823	承德市	0	0.97	1.92082	0.00731	0.58439	0.01	8084	273250	2500000	405	0.31	0.25357	0.285262	0.23786	0	0.0652929	0.000322	0.002543	0.002489	0.000376	41036	220.83	0	1	1	0.0803		4.1036
130900	2003	132903	沧州市	0	4.84	0.675936	0.008404	0.15451	0	6354	174303	854134	113	0.02	0.069321	0.533619	0.099718		0.0191411	0.000248	0.000208	0.000367	0.000574	6727.92	216.79	0	1	1	0.0092	0.011	0.672792
130900	2004	132904	沧州市	0	4.83	0.589197	0.008333	0.18381	0	8453	251899	928410	154	0.02	0.064848	0.515042	0.10296	0	0.020111	0.000294	5e-07	0.000682	0.000294	7383.29	216.84	0	1	1	0.0065	0.0179	0.738329
130900	2005	132905	沧州市	0.02	4.87	0.397296	0.014422	0.21847	0	11962	386950	1000000	175	0.03	0.055687	0.495034	0.106356	0	0.0225769	0.000339	0.016952	0.017267	2.5e-05	8597.06	221.66	0	1	1	0.0076	0.0231	0.859706
130900	2006	132906	沧州市	0	4.92	0.351943	0.013616	0.26626	0	14147	248385	1100000	206	0.03	0.062885	0.46246	0.115132	0.02	0.0242965	7.3e-05	0.000293	1.2e-05	0.000354	9885.58	222.58	0	1	1	0.0093	0.0283	0.988558
130900	2007	132907	沧州市	0	4.98	0.321459	0.015626	0.32709	0	15885	277297	1200000	266	0.04	0.068634	0.469313	0.125104	0	0.0282458	0	0.003632	0.003632	5e-07	11383.5	224.47	0	1	1	0.0092	0.0341	1.13835
130900	2008	132908	沧州市	0.01	5.05	0.294798	0.016067	0.37588	0	15373	277288	1300000	283	0.05	0.072831	0.454009	0.132348	0	0.0310028	0.000803	0.013341	0.012788	0.00035	13174.7	225.03	0	1	1	0.0088	0.0369	1.31747
130900	2009	132909	沧州市	0.01	5.11	0.394946	0.016484	0.42976	0	18445	318065	1400000	391	0.05	0.087463	0.410896	0.138831	0.01	0.0328813	0	0.009683	0.009582	0.0001	14518.5	226.73	0	1	1	0.0109	0.0498	1.45185
130900	2010	132910	沧州市	0.03	5.2	0.406048	0.023257	0.46363	0	19952	339504	1600000	450	0.06	0.096742	0.428349	0.143148	0.01	0.0367257	0.000603	0.031202	0.03134	0.000465	16116	225.44	0	1	1	0.0128	0.0575	1.6116
130900	2011	132911	沧州市	0.02	5.23	0.421021	0.029279	0.4902	0	26003	368155	1700000	521	0.07	0.102255	0.44066	0.145771	0.03	0.0402504	1e-05	0.014792	0.01478	0.00284	18374.8	223.56	0	1	1	0.0214	0.0688	1.83748
130900	2012	132912	沧州市	0.01	5.3	0.449703	0.035611	0.51292	0.01	30803	401765	1900000	541	0.08	0.110785	0.457617	0.164103	0.02	0.052058	5.1e-05	0.009364	0.009387	1.8e-05	20805.5	223.71	0	1	1	0.0315	0.121	2.08055
130900	2013	132913	沧州市	0.02	5.37	0.519726	0.041023	0.53811	0.01	35406	432427	2000000	593	0.09	0.116964	0.48886	0.175036	0.01	0.0545043	0.000305	0.022759	0.02275	0.000314	22072.2	225.95	0	1	1	0.0274	0.0969	2.20722
130900	2014	132914	沧州市	0.04	5.47	0.588208	0.034242	0.80535	0.01	29219	425180	2200000	605	0.11	0.12168	0.497574	0.182017	0.02	0.0587012	0.00017	0.034658	0.03442	0.000408	24174.3	226.75	0	1	1	0.0318	0.1057	2.41743
130900	2015	132915	沧州市	0.04	5.51	0.642179	0.047296	0.55485	0.01	30012	409328	2500000	597	0.12	0.146005	0.435013	0.203944	0.04	0.0614989	0.000115	0.035792	0.035786	0.000277	26350	230.18	0	1	1	0.0495	0.122433	2.635
130900	2016	132916	沧州市	0.02	5.51	0.698151	0.056506	0.78262	0.02	29468	434039	2700000	680	0.14	0.142438	0.436518	0.211267	0.04	0.0645558	0.00054	0.018992	0.019424	0.000108	28604.7	231.99	0	1	1	0.0627	0.14735	2.86047
130900	2017	132917	沧州市	0.01	5.51	0.768113	0.062394	0.60584	0.02	29838	442425	3000000	742	0.16	0.15109	0.43514	0.219061	0.02	0.0674957	0.00027	0.008006	0.008001	0.000275	31044	236.505	0	1	1	0.0842	0.182907	3.1044
130900	2018	132918	沧州市	0.02	5.51	0.811879	0.06725	0.6844	0.03	29585	403513	3400000	780	0.18	0.169255	0.423292	0.232107	0.01	0.0705932	0.001373	0.017318	0.018042	0.00065	33528	241.02	0	1	1	0.1089	0.211204	3.3528
130900	2019	132919	沧州市	0.04	5.51	0.911856	0.071696	0.80982	0.04	29758	422815	3600000	781	0.21	0.191277	0.41329	0.237803	0.02	0.070823	0.001928	0.037828	0.039468	0.000289	36243.9	242.82	0	1	1	0.1532	0.246786	3.62439
130900	2020	132920	沧州市	0.04	5.51	1.00387	0.078283	0.89737	0.05	29639	446154	3900000	815	0.24	0.198662	0.374654	0.238728	0.04	0.0731806	0.000262	0.035644	0.033678	0.002228	37838.5	243.22	0	1	1	0.2091	0.169304	3.78385
130900	2021	132921	沧州市	0	5.51	1.00111	0.085108	0.96489	0.06	29720	469493	4200000	849	0.27	0.160645	0.44805	0.244075	0.04	0.0778355	0.000152	0.000943	0.000811	0.000284	40411.3	241.49	0	1	1	0.1825	0.207183	4.04113
130900	2022	132922	沧州市	0	5.51	1.08011	0.092147	1.01261	0.07	29665	500184	4500000	860	0.31	0.161764	0.446865	0.250607	0	0.0810246	3.1e-05	0.001324	0.00081	0.000545	41826	240.71	0	1	1	0.1677	0.202737	4.1826
130900	2023	132923	沧州市	0	5.51	1.25379	0.099381	1.03709	0.08	29703	533787	4900000	860	0.35	0.164619	0.468909	0.268461	0	0.0863317	0.000379	0.000683	0.000473	0.000589	44294	244.23	0	1	1	0.2037		4.4294
131000	2003	133003	廊坊市	0	6.02	0.619817	0.018686	0.42528	0	4960	147632	1400000	87	0.01	0.061879	0.503593	0.106819		0.0206122	1e-06	0.003057	0.002509	7.8e-06	8385	214.77	0	1	1	0.0046	0.00719	0.8385
131000	2004	133004	廊坊市	0	6.06	0.595474	0.022313	0.57305	0	5274	292129	1500000	116	0.02	0.06554	0.511601	0.107327	0	0.0213067	0.000646	3.6e-05	5.5e-05	5e-07	9211.18	214.55	0	1	1	0.0039	0.0328	0.921118
131000	2005	133005	廊坊市	0	6.09	0.628399	0.026412	0.67664	0	5353	205643	1500000	138	0.02	0.077236	0.506379	0.104896	0	0.0215176	0.003524	0.000626	0.004139	1.1e-05	10165.2	212.47	0	1	1	0.0092	0.0406	1.01652
131000	2006	133006	廊坊市	0	6.15	0.655492	0.031501	0.65161	0	5517	244447	1600000	183	0.03	0.083231	0.502684	0.107427	0	0.0228437	0.000252	0.000162	0.000403	1.1e-05	11255.2	213.78	0	1	1	0.0092	0.046	1.12552
131000	2007	133007	廊坊市	0.02	6.25	0.690872	0.034742	0.74534	0	6051	277546	1700000	229	0.05	0.095223	0.539868	0.119675	0	0.0283803	0.001157	0.015928	0.017085	0.000169	13808.9	215.98	0	1	1	0.0128	0.052618	1.38089
131000	2008	133008	廊坊市	0	6.35	0.697086	0.042236	0.82757	0	7162	286505	1800000	261	0.05	0.10133	0.54385	0.125287	0.02	0.0306696	0.002178	0.00022	0.000394	1.1e-06	16116.5	217.76	0	1	1	0.0117	0.05634	1.61165
131000	2009	133009	廊坊市	0.01	6.43	0.913249	0.046229	1.0576	0	7951	310648	1900000	305	0.05	0.115163	0.524133	0.137591	0	0.0337161	3.6e-05	0.007291	0.007204	0.000123	17752.3	221.46	0	1	1	0.0249	0.068025	1.77523
131000	2010	133010	廊坊市	0	6.52	0.97852	0.04907	0.98614	0	9415	337155	2000000	349	0.06	0.132958	0.589313	0.142936	0.01	0.0370952	3.8e-05	0.004117	0.004143	1.2e-05	19576.3	222.11	0	1	1	0.0291	0.08185	1.95763
131000	2011	133011	廊坊市	0.03	6.61	0.953005	0.057521	1.05079	0	9440	372615	2100000	444	0.08	0.141457	0.61528	0.148842	0	0.0407067	0.000113	0.033995	0.034098	0.000133	21991	223.03	0	1	1	0.0341	0.1	2.1991
131000	2012	133012	廊坊市	0	6.74	1.00962	0.062018	1.05079	0	11175	412629	2200000	455	0.09	0.149381	0.642251	0.170383	0.03	0.0528829	0.000202	0.002929	0.003113	4e-05	24871.9	222.9	0	1	1	0.0357	0.08354	2.48719
131000	2013	133013	廊坊市	0.01	6.62	1.13656	0.068532	0.87167	0	12821	445622	2300000	486	0.1	0.150495	0.702503	0.182624	0	0.0552109	0.001025	0.008562	0.009295	0.000291	27090	225.92	0	1	1	0.048	0.143793	2.709
131000	2014	133014	廊坊市	0.03	7.06	1.16147	0.071719	0.89021	0	10513	440415	2400000	511	0.12	0.139024	0.828025	0.192447	0.01	0.058284	0.00025	0.033065	0.033288	2.7e-05	29415.9	232.07	0	1	1	0.0642	0.15673	2.94159
131000	2015	133015	廊坊市	0.03	7.22	1.34421	0.075593	1.56178	0	11318	441963	2500000	469	0.14	0.194814	0.629501	0.217834	0.03	0.0638712	0.000362	0.032289	0.032375	1.5e-06	31924.8	237.75	0	1	1	0.0762	0.20129	3.19248
131000	2016	133016	廊坊市	0.01	7.32	1.81253	0.080207	1.39502	0	12182	459428	2600000	604	0.17	0.188044	0.665596	0.225215	0.03	0.0683056	7.3e-05	0.009994	0.009681	0.000385	34633.4	240.27	0	1	1	0.0864	0.26802	3.46334
131000	2017	133017	廊坊市	0.03	7.41	2.01325	0.098838	1.22827	0	13110	473642	2700000	575	0.2	0.202257	0.568855	0.236518	0.01	0.0712983	0.000809	0.029322	0.029581	0.000549	37474	245	0	1	1	0.1191	0.336173	3.7474
131000	2018	133018	廊坊市	0.05	7.51	2.00709	0.104905	1.27149	0.03	14107	466382	2900000	642	0.24	0.199584	0.583593	0.253341	0.03	0.0758543	0.002842	0.048217	0.045127	0.005933	40435	249.73	0	1	1	0.1628	0.39197	4.0435
131000	2019	133019	廊坊市	0.1	7.6	2.11334	0.110554	1.36428	0.05	15177	471328	2900000	623	0.28	0.200178	0.606999	0.27062	0.05	0.0825371	0.000462	0.095165	0.094374	0.001253	43912	252.81	0	1	1	0.2098	0.452961	4.3912
131000	2020	133020	廊坊市	0.04	7.7	2.21653	0.117965	1.50541	0.05	16326	501068	3100000	635	0.33	0.197483	0.552419	0.278997	0.1	0.0848488	0.004848	0.031976	0.035542	0.001282	45712.3	254.63	0	1	1	0.2757	0.228688	4.57123
131000	2021	133021	廊坊市	0.01	7.8	2.19693	0.125275	1.60819	0.05	17559	530807	3300000	647	0.39	0.18083	0.607815	0.279417	0.04	0.0876264	0.007872	0.002086	0.008709	0.00125	48912.4	253.26	0	1	1	0.2216	0.274878	4.89124
131000	2022	133022	廊坊市	0	7.9	2.36065	0.132454	1.78418	0.05	18882	589384	3500000	654	0.46	0.169722	0.564442	0.278552	0.01	0.0864712	0.001982	0.001152	0.002487	0.000647	50624	252.58	0	1	1	0.1973	0.172087	5.0624
131000	2023	133023	廊坊市	0.01	8	2.49908	0.139473	1.9215	0.05	20302	693280	3700000	660	0.55	0.16504	0.537758	0.297103	0	0.091309	0.004693	0.00155	0.005793	0.00045	53459	254.94	0	1	1	0.1974		5.3459
131100	2003	133103	衡水市	0	4.69	0.65441	0.006839	0.07035	0.01	2706	83065	417173	72	0.01	0.059139	0.437355	0.096147		0.017416	0	0.002416	0.002416	1e-06	6927.6	209.14	0	1	1	0.0042	0.00729	0.69276
131100	2004	133104	衡水市	0	4.7	0.591484	0.009751	0.07877	0.01	3760	101797	442106	88	0.01	0.061334	0.348043	0.093985	0	0.017592	5.5e-05	0	0.01934	0.001209	7690.16	210.41	0	1	1	0.0044	0.01	0.769016
131100	2005	133105	衡水市	0	4.74	0.541701	0.011592	0.09281	0.01	3691	114659	470095	102	0.01	0.075621	0.338902	0.097008	0	0.0185382	6e-06	0.000847	0.000786	6.7e-05	8946.77	211.17	0	1	1	0.0047	0.0116	0.894677
131100	2006	133106	衡水市	0	4.79	0.559211	0.008511	0.09785	0.01	3542	124694	501625	116	0.02	0.080544	0.275783	0.101925	0	0.0187953	3.5e-06	5.7e-06	3.5e-06	5.7e-06	9936.23	211.14	0	1	1	0.0063	0.0133	0.993623
131100	2007	133107	衡水市	0	4.85	0.59098	0.00534	0.15239	0.01	3789	133950	537271	151	0.02	0.099539	0.253775	0.112105	0	0.021205	0	0.00312	0.00312	4e-06	10954	214.38	0	1	1	0.0077	0.01674	1.0954
131100	2008	133108	衡水市	0.01	4.91	0.488523	0.005544	0.16377	0.01	3372	129549	577728	241	0.02	0.105357	0.231271	0.114719	0	0.0221694	0.000178	0.006566	0.006744	1.1e-05	11947.6	215.27	0	1	1	0.0104	0.0185	1.19476
131100	2009	133109	衡水市	0.01	4.95	0.566815	0.006885	0.1685	0.01	3429	146997	623830	201	0.02	0.138645	0.239877	0.119682	0.01	0.0229393	5.5e-05	0.009406	0.00946	1e-07	13142.4	210.5	0	1	1	0.0132	0.028898	1.31424
131100	2010	133110	衡水市	0.02	4.99	0.585294	0.010052	0.17584	0.01	4377	155604	676592	252	0.02	0.143382	0.249513	0.122091	0.01	0.0246175	0.00024	0.018807	0.018962	8.5e-05	14525.2	208.91	0	1	1	0.0153	0.0347	1.45252
131100	2011	133111	衡水市	0.04	5	0.617846	0.014723	0.17805	0.01	5366	176891	737251	301	0.02	0.147909	0.27108	0.124704	0.02	0.0267444	1e-06	0.04184	0.04184	1e-07	16506.5	208.86	0	1	1	0.0238	0.04567	1.65065
131100	2012	133112	衡水市	0.01	5.01	0.698413	0.018344	0.16153	0.01	6038	195968	807326	306	0.02	0.159056	0.315493	0.148707	0.04	0.0381039	0.000832	0.005044	0.005836	0.002808	18504.4	209.88	0	1	1	0.0305	0.05839	1.85044
131100	2013	133113	衡水市	0.01	5.07	0.832261	0.020236	0.15313	0.01	7045	215371	888690	323	0.02	0.173387	0.369329	0.159474	0.01	0.0401442	7.9e-05	0.008147	0.007418	0.000809	17808.1	215.38	0	1	1	0.0328	0.070011	1.78081
131100	2014	133114	衡水市	0.01	5.13	0.934245	0.021628	0.25157	0.01	5660	213903	983672	341	0.02	0.211093	0.612632	0.177423	0.01	0.0458178	0.000296	0.005191	0.005394	9.2e-05	19614.2	222.16	0	1	1	0.042	0.07631	1.96142
131100	2015	133115	衡水市	0.01	5.13	1.05258	0.01673	0.27336	0.01	4919	203949	1100000	354	0.02	0.220433	0.32914	0.187427	0.01	0.0472029	0.000214	0.010583	0.010795	0.002089	21615.4	225.14	0	1	1	0.0523	0.10366	2.16154
131100	2016	133116	衡水市	0.01	5.13	1.02719	0.023752	0.15596	0.01	5017	214652	1200000	410	0.02	0.213197	0.316154	0.192271	0.01	0.0504408	0.000593	0.005691	0.005835	0.00045	23787.1	225.98	0	1	1	0.0642	0.1367	2.37871
131100	2017	133117	衡水市	0.01	5.12	1.12176	0.026131	0.22643	0.01	5003	217687	1400000	446	0.02	0.195832	0.346891	0.207697	0.01	0.0560367	0.000576	0.008848	0.009362	6.2e-05	26195	229.12	0	1	1	0.0669	0.173123	2.6195
131100	2018	133118	衡水市	0.03	5.12	1.22098	0.029429	0.18971	0.01	5005	188129	1500000	462	0.02	0.230455	0.32013	0.220735	0.01	0.0603694	0.002371	0.029884	0.032021	0.000234	28736	232.26	0	1	1	0.0799	0.19933	2.8736
131100	2019	133119	衡水市	0.01	5.12	1.40825	0.027154	0.21786	0.01	5005	206882	1600000	470	0.02	0.261978	0.309552	0.239334	0.03	0.0635068	0.000227	0.01331	0.013192	0.000345	31581	237.5	0	1	1	0.0961	0.228817	3.1581
131100	2020	133120	衡水市	0.02	5.12	1.48951	0.026407	0.22786	0.01	5005	219804	1700000	482	0.02	0.269137	0.303101	0.246417	0.01	0.0677842	0.000392	0.01476	0.014827	0.000325	33223.2	237.47	0	1	1	0.1445	0.14443	3.32232
131100	2021	133121	衡水市	0	5.12	1.49145	0.026431	0.23928	0.01	5005	232725	1700000	493	0.02	0.232185	0.345566	0.252264	0.02	0.0717401	9.7e-05	0.002593	0.002492	0.000199	35748.2	236.93	0	1	1	0.1215	0.183887	3.57482
131100	2022	133122	衡水市	0	5.12	1.47991	0.026431	0.23705	0.01	5005	253728	1800000	495	0.02	0.234265	0.340373	0.260266	0	0.0767611	0.000144	0.002542	0.001222	0.001464	37214	235.19	0	1	1	0.1085	0.181896	3.7214
131100	2023	133123	衡水市	0	5.12	1.62051	0.026431	0.27179	0.01	5005	269794	1900000	493	0.02	0.23323	0.344671	0.282288	0	0.0834256	0.000268	0.000612	0.000624	0.000255	39372	239.18	0	1	1	0.1186		3.9372
140100	2003	142103	太原市	0.01	4.69	2.14253	0.011887	1.58823	0.04	15248	255574	1700000	145	0.05	0.082938	0.779653	0.240937		0.050178	0.005996	0.00335	0.008772	5e-07	8081.67	240.25	1	1	1	0.0265	0.09179	0.808167
140100	2004	142104	太原市	0.02	4.75	3.0489	0.014265	2.16512	0.04	16678	407337	1800000	170	0.05	0.089287	0.745562	0.240605	0.01	0.0536917	0.018011	0.002537	0.008458	5e-05	9111.23	237.72	1	1	1	0.0285	0.1331	0.911123
140100	2005	142105	太原市	0.05	4.87	2.31664	0.01649	2.65535	0.04	17772	350612	1800000	190	0.06	0.080432	0.79278	0.261501	0.02	0.0576029	0.047485	0.005831	0.0529	0.000416	10166.1	247.62	1	1	1	0.0332	0.1408	1.01661
140100	2006	142106	太原市	0.05	4.99	2.28417	0.013812	2.62756	0.04	18717	377695	1900000	252	0.07	0.094139	0.789432	0.261901	0.05	0.0592027	0.026382	0.018229	0.043606	0.001005	11350	248.24	1	1	1	0.0505	0.152	1.135
140100	2007	142107	太原市	0.01	5.1	2.02737	0.023834	2.98188	0.04	20126	417006	2000000	312	0.09	0.124151	0.567493	0.256399	0.05	0.0628015	0.011669	0.000879	0.012378	1.2e-06	13234	244.64	1	1	1	0.0561	0.15988	1.3234
140100	2008	142108	太原市	0.05	5.15	1.9936	0.0312	3.15892	0.04	20962	448282	2000000	341	0.1	0.104119	0.764922	0.268512	0.01	0.0679097	0.015467	0.029153	0.044348	0.001648	14608.2	245.66	1	1	1	0.0725	0.169253	1.46082
140100	2009	142109	太原市	0.01	5.24	2.68985	0.026163	3.23321	0.04	13559	506577	2100000	410	0.12	0.103482	0.735012	0.283048	0.05	0.0708437	0.002744	0.005568	0.005723	0.002589	14917.4	251.58	1	1	1	0.0977	0.18652	1.49174
140100	2010	142110	太原市	0.04	5.25	2.84285	0.028343	3.29712	0.04	13851	491447	2200000	486	0.13	0.106654	0.730247	0.289756	0.01	0.0761327	0.019193	0.020228	0.038637	0.000784	16432.9	250.69	1	1	1	0.117	0.199453	1.64329
140100	2011	142111	太原市	0.08	5.23	2.71973	0.067914	3.41915	0.04	13543	550705	2200000	661	0.15	0.115048	0.730076	0.298357	0.04	0.0834842	0.015668	0.067758	0.080585	1e-06	19185.6	250.11	1	1	1	0.1648	0.242708	1.91856
140100	2012	142112	太原市	0.05	5.24	2.75855	0.078232	3.58202	0.04	14225	591749	2300000	718	0.17	0.120031	0.77733	0.319748	0.08	0.0930866	0.024186	0.029547	0.050926	5e-06	21507.5	251.08	1	1	1	0.1987	0.294164	2.15075
140100	2013	142113	太原市	0.04	5.27	2.94747	0.094426	3.78728	0.04	15342	634427	2400000	726	0.19	0.132253	0.775052	0.331684	0.05	0.0977403	0.013919	0.022516	0.035336	0.0011	23873.3	252.2	1	1	1	0.226	0.364473	2.38733
140100	2014	142114	太原市	0.05	5.29	3.13909	0.107673	4.00915	0.04	18540	594645	2500000	743	0.21	0.127492	0.802163	0.341361	0.04	0.103402	0.019113	0.031747	0.047277	0.003583	25768.4	255.95	1	1	1	0.2637	0.417644	2.57684
140100	2015	142115	太原市	0.06	5.25	3.30035	0.085049	4.21429	0.04	19046	569164	2500000	741	0.24	0.153542	0.652967	0.353549	0.05	0.10708	0.027117	0.037033	0.062061	0.00014	27726.8	258.99	1	1	1	0.3009	0.489147	2.77268
140100	2016	142116	太原市	0.08	5.24	3.41837	0.046214	4.32234	0.04	18991	567829	2600000	691	0.27	0.143479	0.666615	0.366	0.06	0.111147	0.060737	0.015233	0.075231	0.000738	29632.1	260.26	1	1	1	0.3745	0.566617	2.96321
140100	2017	142117	太原市	0.06	5.24	3.35295	0.010713	4.40173	0.04	18997	549329	2700000	743	0.3	0.141641	0.650969	0.36923	0.08	0.116629	0.048742	0.00853	0.054505	0.002768	31469.3	260.06	1	1	1	0.4308	0.675777	3.14693
140100	2018	142118	太原市	0.11	5.23	3.21581	0.010215	4.44121	0.52	18996	536883	2900000	737	0.34	0.139648	0.688029	0.379958	0.06	0.126077	0.030333	0.07661	0.102514	0.004428	33672.2	259.86	1	1	1	0.514	0.810232	3.36722
140100	2019	142119	太原市	0.09	5.23	3.4022	0.009717	5.03326	0.52	18996	519953	2900000	835	0.38	0.15154	0.633223	0.38333	0.11	0.128492	0.035737	0.054554	0.088843	0.001449	36361.8	259.15	1	1	1	0.631	0.962959	3.63618
140100	2020	142120	太原市	0.15	5.22	3.56924	0.008425	4.82167	0.52	18996	583788	3000000	804	0.43	0.155874	0.584596	0.393477	0.09	0.132629	0.092815	0.054317	0.146068	0.001063	38329	261.22	1	1	1	0.746	0.35935	3.8329
140100	2021	142121	太原市	0.01	5.21	3.18202	0.009193	4.60107	0.52	18996	647622	3100000	774	0.48	0.122801	0.673217	0.399591	0.15	0.142784	0.005811	0.002769	0.005333	0.003247	41377	255.99	1	1	1	0.7356		4.1377
140100	2022	142122	太原市	0.01	5.21	3.22163	0.008716	6.04203	0.52	18996	684133	3200000	806	0.54	0.128504	0.6111	0.395817	0.01	0.138477	0.006944	0.001335	0.007759	0.00052	43694	253.01	1	1	1	0.7273	0.636844	4.3694
140100	2023	142123	太原市	0.02	5.2	3.48444	0.009004	7.48299	0.52	18996	716579	3400000	806	0.6	0.139444	0.577972	0.401575	0.01	0.149829	0.013761	0.002296	0.014381	0.001676	45835	255.32	1	1	1	0.7949		4.5835
140200	2003	142203	大同市	0	2.09	0.7511	0.002785	0.21967	0.05	14543	86359	397713	62	0.02	0.122797	0.427326	0.148307		0.0280078	7.8e-06	0	0.0003	0.003792	6443.04	228.85	0	1	1	0.0017	0.02809	0.644304
140200	2004	142204	大同市	0.01	2.12	0.661023	0.002429	0.23311	0.05	14813	160171	419456	71	0.02	0.121331	0.414314	0.149563	0	0.0303536	3.6e-05	0.008422	5e-05	3.5e-08	6895.56	227.16	0	1	1	0.0024	0.0597	0.689556
140200	2005	142205	大同市	0	2.12	0.596693	0.001064	0.26062	0.04	16484	199934	443326	87	0.02	0.126673	0.43533	0.160025	0.01	0.0308288	3.6e-05	0.003479	0.003263	0.000252	7974.92	233.3	0	1	1	0.0022	0.0716	0.797492
140200	2006	142206	大同市	0.01	2.16	0.630679	0.00311	0.27789	0.04	16675	132476	469586	95	0.03	0.139719	0.459963	0.167258	0	0.0323462	0	0.008421	0.008421	3.9e-05	9054.14	234.92	0	1	1	0.005	0.0812	0.905414
140200	2007	142207	大同市	0.01	2.19	0.662084	0.006421	0.30034	0.03	18229	147978	498541	147	0.03	0.151925	0.492224	0.171673	0.01	0.0346808	4e-06	0.00843	0.00843	1.3e-06	10574.4	235.2	0	1	1	0.0064	0.09207	1.05744
140200	2008	142208	大同市	0.01	2.21	0.644216	0.009201	0.33965	0.03	18279	134128	530542	149	0.04	0.174308	0.47	0.172665	0.01	0.0355522	1.2e-05	0.011808	0.011469	5e-06	12526.2	235.4	0	1	1	0.0109	0.10138	1.25262
140200	2009	142209	大同市	0	2.23	0.765575	0.00917	0.37449	0.03	16483	178084	565997	157	0.04	0.186352	0.428545	0.190205	0.01	0.039502	0	0.001053	3.8e-05	0.001015	13171.3	240.87	0	1	1	0.0104	0.11897	1.31713
140200	2010	142210	大同市	0	2.25	0.858168	0.0157	0.34186	0.02	17360	185154	605376	231	0.05	0.190794	0.415564	0.191973	0	0.0410883	1e-06	8.8e-05	8.9e-05	3.7e-06	14418.5	239.89	0	1	1	0.0137	0.13698	1.44185
140200	2011	142211	大同市	0.02	2.26	0.780862	0.010635	0.34707	0.02	19269	203876	649230	298	0.05	0.200585	0.382019	0.194355	0	0.0433133	0.000941	0.023514	0.024455	8.1e-05	16936.7	237.25	0	1	1	0.0184	0.15927	1.69367
140200	2012	142212	大同市	0	2.26	0.827282	0.021015	0.37084	0.02	19537	220494	698199	325	0.06	0.200299	0.430457	0.199012	0.02	0.0462739	7.4e-05	0.00028	0.000349	2.1e-05	19360.9	237.62	0	1	1	0.0381	0.18903	1.93609
140200	2013	142213	大同市	0.01	2.39	0.982837	0.016455	0.30001	0.02	20274	234349	753037	338	0.06	0.241937	0.404054	0.206342	0	0.0472171	3e-05	0.010507	0.010537	3e-06	21316.4	240.59	0	1	1	0.0312	0.232456	2.13164
140200	2014	142214	大同市	0	2.39	1.03101	0.018159	0.29962	0.01	21967	222202	814628	342	0.07	0.221406	0.473178	0.214043	0.01	0.0501855	3.6e-06	0.000387	0.000213	0.000178	23043	243.13	0	1	1	0.0271	0.27518	2.3043
140200	2015	142215	大同市	0.01	2.23	1.12176	0.0191	0.28752	0.01	22669	209995	884016	309	0.08	0.276069	0.317728	0.227462	0	0.0524411	1e-06	0.008969	0.00883	9e-05	24771.2	246.47	0	1	1	0.0386	0.3195	2.47712
140200	2016	142216	大同市	0.02	2.26	1.19489	0.02011	0.28142	0.01	23393	216935	962439	298	0.09	0.278699	0.311052	0.241436	0.01	0.0543335	2.2e-05	0.016782	0.016784	2e-05	26272.8	250.83	0	1	1	0.0559	0.40415	2.62728
140200	2017	142217	大同市	0.01	2.28	1.10945	0.017013	0.27337	0.01	24139	215977	1100000	304	0.09	0.29029	0.332642	0.237858	0.02	0.0552354	0	0.00788	0.00783	5e-05	27980.6	251.575	0	1	1	0.0566	0.53837	2.79806
140200	2018	142218	大同市	0.01	2.31	1.08349	0.018194	0.27512	0.01	24909	424665	1100000	417	0.1	0.26258	0.358367	0.24522	0.01	0.0577943	0.00062	0.012578	0.013188	1e-05	29911.2	252.32	0	1	1	0.0817	0.6911	2.99112
140200	2019	142219	大同市	0.01	2.33	1.18129	0.007003	0.28495	0.01	25703	633353	1200000	341	0.11	0.275483	0.358137	0.252995	0.01	0.0608227	0.000142	0.011163	0.010929	0.000376	32252	250.98	0	1	1	0.0935	0.838632	3.2252
140200	2020	142220	大同市	0.02	2.35	1.33687	0.007035	0.30059	0.01	26521	432060	1500000	357	0.13	0.28334	0.34789	0.261457	0.01	0.0619616	0.000331	0.023162	0.021985	0.001508	33945	251.77	0	1	1	0.0977	0.33288	3.3945
140200	2021	142221	大同市	0.01	2.37	1.17927	0.007035	0.31976	0	27365	230768	1700000	373	0.14	0.221934	0.445575	0.253296	0.02	0.0646363	0.00021	0.00482	0.00498	5e-05	36685	244.43	0	1	1	0.0839		3.6685
140200	2022	142222	大同市	0	2.38	1.22805	0.007035	0.52838	0	28236	239474	2000000	376	0.15	0.217502	0.465842	0.245998	0.01	0.0650155	0.000245	0.000939	0.000831	0.000352	38996	242.42	0	1	1	0.0603	0.318762	3.8996
140200	2023	142223	大同市	0	2.4	1.3676	0.007035	0.5001	0	29133	254588	2200000	378	0.17	0.248183	0.417682	0.252358	0	0.0662711	0.000152	0.002198	0.002244	0.000107	40907	244.33	0	1	1	0.0678		4.0907
140300	2003	142303	阳泉市	0	2.75	0.915173	0.000803	0.03112	0	9153	55588	819130	30	0.01	0.09989	0.553526	0.156572		0.0229308	0	0.0003	1.5e-06	1.3e-05	6814.42	234.42	0	1	1	0.0014	0.01249	0.681442
140300	2004	142304	阳泉市	0	2.76	0.846165	0.000598	0.04757	0	9687	74401	819238	37	0.01	0.10489	0.588333	0.156139	0	0.0237973	5e-05	0	0.008019	1.1e-05	8251.67	232.26	0	1	1	0.0018	0.0248	0.825167
140300	2005	142305	阳泉市	0	2.75	0.73949	2.2e-05	0.05486	0	10560	96107	819373	48	0.02	0.100124	0.644663	0.173031	0	0.0272075	0	0.002829	0.002829	4.9e-06	9319.2	237.83	0	1	1	0.001	0.0358	0.93192
140300	2006	142306	阳泉市	0.01	2.78	0.723315	0.002488	0.05496	0	11009	102089	819544	61	0.02	0.107919	0.600044	0.174983	0	0.0292387	0	0.009935	0.009935	0.001001	10537.9	236.28	0	1	1	0.0024	0.0434	1.05379
140300	2007	142307	阳泉市	0.01	2.81	0.75048	0.003549	0.06364	0	11453	90699	819760	73	0.02	0.122672	0.645014	0.182047	0.01	0.0323628	0	0.006606	0.006606	0.0001	12212.2	236.17	0	1	1	0.0039	0.05333	1.22122
140300	2008	142308	阳泉市	0.01	2.83	0.726122	0.004881	0.07039	0	11914	161520	820032	79	0.03	0.130813	0.643991	0.183117	0.01	0.0336177	0	0.011893	0.011893	0.001	13981	236.53	0	1	1	0.0089	0.05867	1.3981
140300	2009	142309	阳泉市	0	2.85	0.840063	0.00433	0.0714	0	6780	259338	820374	100	0.03	0.140428	0.608024	0.196952	0.01	0.038222	0.000209	7e-06	0.000215	1e-07	15026.8	238.52	0	1	1	0.006	0.06738	1.50268
140300	2010	142310	阳泉市	0	2.86	0.859559	0.003775	0.10355	0	7595	252700	820806	103	0.03	0.138797	0.632475	0.195885	0	0.0399049	3e-06	0.002171	0.002171	8.3e-06	16551.4	236.48	0	1	1	0.0146	0.0823	1.65514
140300	2011	142311	阳泉市	0.01	2.88	0.814465	0.018134	0.10718	0	7786	100982	821350	116	0.03	0.134513	0.656489	0.19926	0	0.042678	5e-06	0.008451	0.008457	0.0007	19622.2	236.36	0	1	1	0.0203	0.09543	1.96222
140300	2012	142312	阳泉市	0.01	2.89	0.880748	0.023576	0.11999	0	7991	129785	822035	136	0.03	0.147103	0.642337	0.207679	0.01	0.0471647	7.7e-05	0.008269	0.008325	3.5e-05	21070.8	237.08	0	1	1	0.0176	0.11789	2.10708
140300	2013	142313	阳泉市	0.01	2.9	1.00914	0.0265	0.12356	0	8413	132972	822900	159	0.03	0.141151	0.555235	0.209186	0.01	0.0470301	1.3e-05	0.005178	0.005188	9.4e-05	23114.7	237.94	0	1	1	0.0174	0.1483	2.31147
140300	2014	142314	阳泉市	0.01	2.91	1.05313	0.0276	0.13787	0	8543	150584	823990	152	0.03	0.140943	0.541354	0.218635	0.01	0.0493416	0.000199	0.010174	0.010373	0.00069	24825.2	240.79	0	1	1	0.0109	0.18168	2.48252
140300	2015	142315	阳泉市	0.03	2.89	1.21089	0.0305	0.13726	0	8524	173506	825366	150	0.03	0.169062	0.438531	0.215926	0.01	0.0460038	0	0.02457	0.02448	0.00067	26414	245.84	0	1	1	0.0119	0.2202	2.6414
140300	2016	142316	阳泉市	0.01	2.89	1.19227	0.031146	0.14297	0	8526	249563	827103	147	0.03	0.153694	0.431186	0.23194	0.03	0.0499593	3e-05	0.010245	0.010067	0.000208	27801.2	247.64	0	1	1	0.0227	0.27333	2.78012
140300	2017	142317	阳泉市	0	2.88	1.31649	0.011501	0.15067	0	8526	139497	829295	142	0.03	0.157816	0.471412	0.228272	0.01	0.0506302	0.00116	0.001182	0.002232	0.00011	29580.5	248.355	0	1	1	0.0414	0.5306	2.95805
140300	2018	142318	阳泉市	0.01	2.88	1.40829	0.006718	0.16632	0.01	8526	400282	832467	159	0.03	0.168919	0.464895	0.235502	0	0.0526258	0.00017	0.006418	0.006588	0.000186	31473.7	249.07	0	1	1	0.0322	0.4252	3.14737
140300	2019	142319	阳泉市	0.01	2.88	1.5766	0.001936	0.16946	0.01	8526	700000	827380	165	0.03	0.183957	0.433924	0.237922	0.01	0.0523352	5.3e-05	0.010054	0.009905	0.000202	33582.4	250.19	0	1	1	0.0304	0.4863	3.35824
140300	2020	142320	阳泉市	0.01	2.88	1.58133	0.004586	0.18761	0.01	8526	401737	874405	166	0.03	0.208373	0.368206	0.24242	0.01	0.0533789	9.2e-05	0.011576	0.011236	0.000433	35018	250.87	0	1	1	0.053	0.136347	3.5018
140300	2021	142321	阳泉市	0	2.88	1.45316	0.003492	0.2188	0.01	8526	103474	921430	167	0.03	0.139466	0.439396	0.242474	0.01	0.0577914	0.000114	4.7e-05	5.1e-05	0.00011	37464	244.03	0	1	1	0.0452		3.7464
140300	2022	142322	阳泉市	0	2.88	1.42017	0.003806	0.25815	0.01	8526	116280	968454	168	0.03	0.156441	0.517242	0.242601	0	0.0610326	0.000111	0.000115	0.000133	9.3e-05	39300	240.27	0	1	1	0.0333	0.167619	3.93
140300	2023	142323	阳泉市	0	2.88	1.49591	0.003704	0.28083	0.01	8526	108767	1000000	168	0.03	0.167706	0.493868	0.245697	0	0.0614873	0	0.000104	7.9e-05	2.5e-05	40793	242.16	0	1	1	0.0349		4.0793
140400	2003	142403	长治市	0	2.28	0.849522	0.001162	0.17601	0.07	8516	85583	406855	46	0.02	0.108091	0.476193	0.111473		0.0178376	1.5e-06	0	0.000222	1.2e-06	6795.51	217.49	0	1	1	0.0017	0.0304	0.679551
140400	2004	142404	长治市	0.01	2.29	0.837987	0.000377	0.17292	0.07	9663	137602	438651	60	0.02	0.109127	0.490731	0.110276	0	0.0190434	0.002411	0.005658	0.004372	5e-05	7763.05	216.98	0	1	1	0.0027	0.0488	0.776305
140400	2005	142405	长治市	0	2.28	0.724165	0.000916	0.25016	0.06	10622	179079	473938	71	0.03	0.118871	0.503694	0.12627	0.01	0.0212015	6.6e-05	0.00286	0.002927	0.000354	8648.76	226.66	0	1	1	0.0024	0.0537	0.864876
140400	2006	142406	长治市	0	2.3	0.720376	0.003002	0.23578	0.06	12935	116272	513185	76	0.04	0.151603	0.637864	0.127973	0	0.0231322	6e-07	0.002972	0.002934	5e-06	9562.83	227.73	0	1	1	0.005	0.0591	0.956283
140400	2007	142407	长治市	0	2.33	0.654636	0.015686	0.24647	0.06	10825	298000	556933	124	0.05	0.143182	0.631034	0.131517	0	0.0246785	2.3e-05	1.6e-05	3.8e-05	7.9e-06	11602.1	227.72	0	1	1	0.0069	0.06273	1.16021
140400	2008	142408	长治市	0.01	2.36	0.583927	0.039217	0.26192	0.06	11225	309373	605809	144	0.07	0.14242	0.644636	0.132288	0	0.028132	6e-07	0.008344	0.008343	0.004353	13254	226.01	0	1	1	0.0103	0.06902	1.3254
140400	2009	142409	长治市	0	2.37	0.613731	0.010967	0.30357	0.05	8826	157344	660542	182	0.08	0.145305	0.617582	0.162966	0.01	0.0355484	2e-06	3.7e-05	3.9e-05	0.016	14280.1	227.14	0	1	1	0.0131	0.08891	1.42801
140400	2010	142410	长治市	0.02	2.39	0.685878	0.013892	0.37218	0.05	9079	155843	721983	195	0.11	0.147643	0.573361	0.148585	0	0.0350282	3.1e-05	0.015295	0.015326	3.3e-05	15675.3	224.85	0	1	1	0.0219	0.10506	1.56753
140400	2011	142411	长治市	0.02	2.41	0.599675	0.020716	0.30668	0.05	9705	199676	791126	230	0.14	0.144454	0.593113	0.152266	0.02	0.0382384	0.000925	0.017476	0.018268	0.001079	18429.3	223.07	0	1	1	0.0349	0.12706	1.84293
140400	2012	142412	长治市	0	2.42	0.633352	0.027929	0.30533	0.04	10938	195644	869133	262	0.17	0.151909	0.66142	0.159098	0.02	0.0443137	4e-05	0.003341	0.003381	2.2e-05	20639.1	223.6	0	1	1	0.0414	0.16401	2.06391
140400	2013	142413	长治市	0.01	2.44	0.688927	0.031262	0.32376	0.04	11731	228405	957372	288	0.22	0.184356	0.604613	0.16538	0	0.044239	2e-05	0.006142	0.006068	9.4e-05	22682.4	225.49	0	1	1	0.044	0.214859	2.26824
140400	2014	142414	长治市	0.03	2.44	0.76395	0.034402	0.41161	0.03	12370	203582	1100000	299	0.27	0.183316	0.558663	0.180948	0.01	0.0466171	2e-05	0.029786	0.029806	5.8e-05	24565	231.9	0	1	1	0.05	0.26912	2.4565
140400	2015	142415	长治市	0.02	2.43	0.947019	0.045118	0.39659	0.03	12917	207138	1200000	298	0.33	0.202087	0.399212	0.192792	0.03	0.0453064	6.3e-05	0.024092	0.023485	9e-05	26407.4	238.16	0	1	1	0.0378	0.3261	2.64074
140400	2016	142416	长治市	0.03	2.42	0.942021	0.047502	0.38129	0.02	13487	228606	1300000	306	0.41	0.184453	0.420441	0.19706	0.02	0.0482852	2.6e-05	0.032392	0.032407	1.2e-05	28093.8	238.42	0	1	1	0.0357	0.3751	2.80938
140400	2017	142417	长治市	0.01	2.42	0.923793	0.03847	0.362	0.02	14082	415574	1400000	326	0.5	0.181674	0.492805	0.194909	0.03	0.0495186	0.00019	0.004988	0.005119	6e-05	30060.3	237.74	0	1	1	0.0577	0.480842	3.00603
140400	2018	142418	长治市	0.02	2.41	0.941914	0.0396	0.35424	0.01	14703	239259	1700000	341	0.6	0.196718	0.465423	0.19963	0.01	0.052854	0.000163	0.015198	0.015175	0.000324	32024	237.06	0	1	1	0.0695	0.6019	3.2024
140400	2019	142419	长治市	0.02	2.41	1.06308	0.04079	0.37069	0.01	15351	186433	1800000	392	0.73	0.216164	0.456824	0.199618	0.02	0.0522949	0.000313	0.015383	0.015463	0.000233	34426.3	239.46	0	1	1	0.1092	0.680347	3.44263
140400	2020	142420	长治市	0.01	2.41	1.17548	0.040491	0.43251	0.01	16027	202096	1900000	380	0.87	0.231354	0.419998	0.210536	0.02	0.055717	0.001658	0.008064	0.008044	0.001678	36010	239.25	0	1	1	0.1442	0.32907	3.601
140400	2021	142421	长治市	0	2.41	0.954885	0.040457	0.50841	0.01	16732	217760	2100000	369	1	0.167956	0.577247	0.208065	0.01	0.0618837	7e-05	0.000978	0.000928	0.00012	38786	231.09	0	1	1	0.1286		3.8786
140400	2022	142422	长治市	0	2.41	0.858124	0.040452	0.55531	0.01	17467	275289	2200000	375	1.2	0.175333	0.63132	0.206756	0	0.0677049	7.5e-05	0.000769	0.000844	0.000422	41113	226.24	0	1	1	0.1163	0.309634	4.1113
140400	2023	142423	长治市	0	2.41	0.977103	0.040452	0.59798	0.01	18235	310099	2300000	390	1.5	0.204071	0.550235	0.212466	0	0.069463	0.000464	0.000918	0.001208	0.000174	43169	227.01	0	1	1	0.1343		4.3169
140500	2003	142503	晋城市	0	2.23	0.829943	0.000859	0.08065	0.01	11795	68543	1300000	38	0.01	0.096983	0.53387	0.132777		0.0191617	0.000117	0.000106	8e-06	0.001613	6852.23	229.32	0	1	1	0.0004	0.0219	0.685223
140500	2004	142504	晋城市	0	2.24	0.87854	0.000748	0.08105	0.01	13478	126204	1300000	45	0.01	0.095589	0.592487	0.126893	0	0.0198464	0.004366	5.1e-06	0.000235	0.0017	7803.6	223.88	0	1	1	0.0011	0.0425	0.78036
140500	2005	142505	晋城市	0.01	2.23	0.703154	0.000962	0.09758	0.01	12906	161582	1400000	67	0.02	0.0991	0.640109	0.135557	0	0.0238353	0.003998	0.002834	0.006826	2.8e-06	8542.93	225.53	0	1	1	0.0017	0.0554	0.854293
140500	2006	142506	晋城市	0.01	2.35	0.71439	0.005312	0.04603	0.01	13057	189031	1400000	57	0.02	0.107662	0.675261	0.135607	0.01	0.0248274	4.1e-05	0.009423	0.008463	3.3e-05	9661.1	225.52	0	1	1	0.0024	0.0652	0.96611
140500	2007	142507	晋城市	0	2.36	0.799617	0.032282	0.06274	0.01	13069	231334	1400000	92	0.03	0.128703	0.630502	0.151239	0.01	0.0301031	0.001321	2.3e-06	0.001322	6e-07	11758.3	225.81	0	1	1	0.005	0.07062	1.17583
140500	2008	142508	晋城市	0.01	2.35	0.714201	0.030498	0.07609	0.01	14150	244380	1500000	99	0.03	0.119975	0.661435	0.157345	0	0.0322114	0.007176	4.1e-06	0.007169	0.001189	13336.5	226.97	0	1	1	0.0043	0.07769	1.33365
140500	2009	142509	晋城市	0	2.3	0.704822	0.019433	0.08125	0.01	8119	336901	1500000	125	0.04	0.12621	0.628506	0.148236	0.01	0.0307917	1e-05	3.7e-06	1.4e-05	9.7e-05	14219.6	227.41	0	1	1	0.0093	0.08759	1.42196
140500	2010	142510	晋城市	0.02	2.29	0.715795	0.013093	0.07964	0.01	9395	378751	1500000	167	0.05	0.122521	0.619941	0.163605	0	0.0360545	0.004848	0.013411	0.018251	8e-08	16186.9	226.97	0	1	1	0.0168	0.10466	1.61869
140500	2011	142511	晋城市	0.02	2.31	0.707783	0.021799	0.0492	0.01	10425	152606	1600000	158	0.06	0.126525	0.599822	0.163705	0.02	0.0386627	0.002337	0.014514	0.016851	0.000194	18774.5	224.89	0	1	1	0.017	0.1167	1.87745
140500	2012	142512	晋城市	0.02	2.32	0.767119	0.025775	0.05907	0.01	11110	165524	1600000	172	0.07	0.128184	0.63859	0.172374	0.02	0.0428609	0.005158	0.010186	0.015344	2e-05	21024.1	226.01	0	1	1	0.0181	0.16869	2.10241
140500	2013	142513	晋城市	0.02	2.33	0.832454	0.0284	0.06168	0.01	12262	181680	1700000	224	0.08	0.152451	0.60118	0.182466	0.02	0.0456626	0.010213	0.006175	0.016388	3.1e-05	23126.5	228.15	0	1	1	0.0258	0.216625	2.31265
140500	2014	142514	晋城市	0.01	2.32	0.888866	0.028429	0.06376	0.01	12812	209659	1700000	225	0.1	0.156129	0.606167	0.199509	0.02	0.0498459	0.000815	0.004912	0.005037	0.000248	24907.2	231.8	0	1	1	0.0238	0.2715	2.49072
140500	2015	142515	晋城市	0.01	2.32	0.957201	0.025675	0.06283	0.01	12812	231344	1800000	229	0.11	0.173147	0.521349	0.20988	0.01	0.0515922	0.002019	0.006704	0.008633	0.00092	26650.7	234.14	0	1	1	0.0244	0.3244	2.66507
140500	2016	142516	晋城市	0.02	2.32	1.03133	0.020012	0.06325	0.01	12812	401923	1900000	225	0.14	0.164397	0.51779	0.203726	0.01	0.0478024	0.0023	0.014382	0.016622	6e-05	28223.1	236.62	0	1	1	0.0226	0.38853	2.82231
140500	2017	142517	晋城市	0.01	2.32	1.06034	0.020048	0.05754	0.01	12812	316445	1900000	249	0.16	0.154934	0.568154	0.200051	0.02	0.0485434	6e-05	0.006653	0.006583	0.00013	30142.3	237.62	0	1	1	0.0416	0.484832	3.01423
140500	2018	142518	晋城市	0	2.32	1.01758	0.028442	0.05165	0.01	12812	674724	2000000	268	0.19	0.168997	0.54847	0.208443	0.01	0.0525296	0.000208	0.003853	0.003736	1.1e-05	32161.8	238.62	0	1	1	0.042	0.60797	3.21618
140500	2019	142519	晋城市	0.03	2.32	1.13224	0.031183	0.04077	0	12812	1200000	2100000	258	0.23	0.186362	0.547332	0.21156	0	0.0551227	3.8e-05	0.027742	0.027763	1.7e-05	34626.6	237.69	0	1	1	0.0491	0.732676	3.46266
140500	2020	142520	晋城市	0	2.32	1.19527	0.031265	0.03959	0	12812	694940	2200000	254	0.28	0.19916	0.511456	0.222082	0.03	0.0589899	0.001085	0.001316	0.002294	0.000107	36331.6	237.52	0	1	1	0.0637	0.326488	3.63316
140500	2021	142521	晋城市	0.01	2.32	1.09762	0.031325	0.11315	0	12812	178436	2200000	250	0.33	0.152787	0.689081	0.225185	0	0.0661209	0.00807	0.000579	0.00835	0.0003	39089	230.61	0	1	1	0.0609		3.9089
140500	2022	142522	晋城市	0	2.32	0.876982	0.03137	0.14587	0	12812	193014	2300000	269	0.39	0.167782	0.731741	0.225631	0.01	0.0719597	0.00012	0.000474	0.000172	0.000469	41669	226.19	0	1	1	0.0581	0.29589	4.1669
140500	2023	142523	晋城市	0	2.32	1.07098	0.031404	0.17922	0	12812	192559	2300000	267	0.47	0.184843	0.642778	0.233691	0	0.074828	0.00021	0.000332	0.000422	0.00012	43835	227.49	0	1	1	0.075		4.3835
140600	2003	142603	朔州市	0	1.34	0.910063	0	0	0.01	12814	34100	326708	22	0.01	0.09535	0.467231	0.133951		0.0196529	6.4e-06	2.1e-06	0.005238	0.000393	6834.57	217.84	0	1	1	0.0003	0.0047	0.683457
140600	2004	142604	朔州市	0	1.35	0.820129	8.8e-05	0.00036	0.01	14585	65911	345754	31	0.01	0.109478	0.41957	0.112356	0	0.0150848	0	0.000246	0.003156	5e-07	7483.42	216.26	0	1	1	0.0003	0.0104	0.748342
140600	2005	142605	朔州市	0	1.37	0.693089	0.007243	0.00073	0.01	18499	84143	366148	41	0.01	0.111992	0.556087	0.119496	0	0.0168574	1.5e-07	0.002864	0.002864	8e-07	8417.26	220.18	0	1	1	0.0002	0.0176	0.841726
140600	2006	142606	朔州市	0	1.4	0.483115	0.005406	0.00109	0.01	21143	84142	387998	50	0.01	0.159838	0.454571	0.138658	0	0.0235617	0	2.5e-05	2.5e-05	0.00012	9386.09	219.02	0	1	1	0.0009	0.0216	0.938609
140600	2007	142607	朔州市	0	1.38	0.347032	0.004031	0.00146	0.01	16743	135861	411425	56	0.02	0.132806	0.684589	0.146407	0	0.0271077	0	0.000306	0.000306	0.006425	11154.9	220.79	0	1	1	0.0014	0.02646	1.11549
140600	2008	142608	朔州市	0	1.4	0.39353	0.006069	0.00182	0.01	16986	139839	436558	74	0.02	0.143985	0.624448	0.154535	0	0.0302722	0	1.2e-05	1.2e-05	2.2e-05	13178	223.93	0	1	1	0.0024	0.02991	1.3178
140600	2009	142609	朔州市	0.01	1.42	0.346571	0.005088	0.00219	0.01	21185	110887	463540	85	0.02	0.128537	0.640639	0.169976	0	0.0318595	0	0.008365	0.008365	2e-06	14513.7	236.14	0	1	1	0.0041	0.03546	1.45137
140600	2010	142610	朔州市	0.01	1.44	0.663702	0.013892	0.00255	0.01	17548	120031	492527	87	0.03	0.134495	0.618577	0.165165	0.01	0.0332868	0	0.008384	0.008384	0.049	16349.5	230.34	0	1	1	0.003	0.04306	1.63495
140600	2011	142611	朔州市	0	1.62	0.24848	0.011588	0.00292	0.01	20475	94761	523690	132	0.03	0.134963	0.614438	0.163529	0.01	0.0354372	0.0009	0.003004	0.003904	0.000335	18890.6	230.06	0	1	1	0.0078	0.05369	1.88906
140600	2012	142612	朔州市	0.01	1.63	0.233375	0.0134	0.00328	0.01	23858	118819	557214	131	0.04	0.13777	0.607205	0.171692	0	0.040799	3e-05	0.008351	0.008381	0.023	21734.3	229.7	0	1	1	0.0105	0.0675	2.17343
140600	2013	142613	朔州市	0.01	1.63	0.260583	0.01542	0.01002	0.01	23093	115449	593304	150	0.04	0.150493	0.616965	0.178808	0.01	0.0415152	0	0.005139	0.005139	1.9e-05	23886	230.92	0	1	1	0.0168	0.08865	2.3886
140600	2014	142614	朔州市	0.01	1.64	0.301899	0.01542	0.08916	0.01	24072	121580	632185	182	0.05	0.142577	0.605255	0.180394	0.01	0.0410129	6e-06	0.011182	0.011188	0.000258	25725.2	232.67	0	1	1	0.0119	0.11482	2.57252
140600	2015	142615	朔州市	0.01	1.52	0.397947	0.007234	0.10642	0.01	25807	82490	674102	156	0.05	0.153466	0.392644	0.196409	0.01	0.0413577	0	0.007042	0.007042	9e-05	27500.2	241.59	0	1	1	0.0039	0.1416	2.75002
140600	2016	142616	朔州市	0.01	1.53	0.628857	0.009833	0.11357	0.01	27666	134543	719326	175	0.06	0.139054	0.384793	0.203918	0.01	0.0424509	0	0.008198	0.008198	4.1e-05	28989.1	243.69	0	1	1	0.0081	0.1717	2.89891
140600	2017	142617	朔州市	0.01	1.54	0.636359	0.002356	0.10522	0.01	29659	104141	768153	190	0.07	0.144581	0.51665	0.199684	0.01	0.0409043	0	0.007023	0.006933	9e-05	30989.3	246.805	0	1	1	0.0115	0.221399	3.09893
140600	2018	142618	朔州市	0.01	1.54	0.692896	0.003626	0.10614	0.02	31796	100970	846686	217	0.08	0.163174	0.519906	0.21841	0.01	0.0469838	8.1e-05	0.006883	0.006953	0.000249	32848.7	249.92	0	1	1	0.0129	0.29128	3.28487
140600	2019	142619	朔州市	0.01	1.55	0.811231	0.004896	0.11112	0.02	34085	98515	883045	176	0.09	0.181654	0.478386	0.227553	0.01	0.0502071	5e-05	0.007394	0.007361	8.3e-05	35100	247.71	0	1	1	0.0168	0.353824	3.51
140600	2020	142620	朔州市	0	1.56	0.923272	0.005089	0.13108	0.02	36540	104106	933824	176	0.1	0.180257	0.451529	0.232791	0.01	0.0507939	5.6e-05	0.001013	0.001019	5e-05	36487	247.36	0	1	1	0.0246	0.20387	3.6487
140600	2021	142621	朔州市	0	1.56	0.810872	0.005114	0.18411	0.02	39171	109696	984603	176	0.11	0.145963	0.56069	0.234531	0	0.0574082	0.00149	0.000101	0.001491	0.0001	39168	240.58	0	1	1	0.0264		3.9168
140600	2022	142622	朔州市	0	1.57	0.750162	0.005117	0.25518	0.02	41991	128860	1000000	183	0.13	0.161656	0.637216	0.237515	0	0.0611797	5e-06	8.1e-05	8.6e-05	0.000104	41009	236.84	0	1	1	0.025	0.078437	4.1009
140600	2023	142623	朔州市	0	1.57	0.952625	0.005118	0.26509	0.02	45013	129646	1100000	186	0.14	0.190037	0.513937	0.250924	0	0.0658519	0.001805	4.7e-05	0.001832	2e-05	42649	238.36	0	1	1	0.0276		4.2649
140700	2003	142703	晋中市	0.01	1.86	0.858028	0.0003	0.21919	0.01	8454	108597	537266	51	0.01	0.119226	0.390706	0.124168		0.0199305	0	0.005238	0.003829	1.6e-07	6045.93	218.26	0	1	1	0.0021	0.03521	0.604593
140700	2004	142704	晋中市	0	1.87	0.754719	0.000263	0.24699	0.01	8982	166778	580203	68	0.02	0.120119	0.425541	0.127148	0.01	0.0215768	2.6e-06	0.003204	0.005657	3.5e-06	6929.59	217.14	0	1	1	0.0026	0.0535	0.692959
140700	2005	142705	晋中市	0.01	1.87	0.592779	0.002402	0.33658	0.01	9795	177309	627253	61	0.02	0.119177	0.487029	0.138584	0	0.0233508	2.4e-05	0.005816	0.00584	0.0001	8015.16	224.28	0	1	1	0.0032	0.0652	0.801516
140700	2006	142706	晋中市	0.02	1.89	0.589585	0.003206	0.36408	0.01	11047	247813	678868	79	0.02	0.172178	0.359808	0.140237	0.01	0.0242193	1.2e-05	0.022157	0.022169	0.000208	9164.49	226.23	0	1	1	0.004	0.0786	0.916449
140700	2007	142707	晋中市	0	1.91	0.547287	0.005749	0.40695	0.01	10735	260801	735552	161	0.03	0.153353	0.568816	0.141497	0.02	0.0258557	0.000103	0.000148	0.00015	0.000287	10831.6	226.72	0	1	1	0.0044	0.08829	1.08316
140700	2008	142708	晋中市	0.01	1.94	0.498955	0.006989	0.51841	0.01	12522	424164	797874	148	0.04	0.150896	0.547514	0.145633	0	0.0290621	0.001688	0.003663	0.003703	5.5e-06	12996.3	226	0	1	1	0.008	0.09844	1.29963
140700	2009	142709	晋中市	0.01	1.95	0.569096	0.007048	0.5413	0.01	9436	176806	866472	169	0.05	0.161881	0.560271	0.1604	0.01	0.032617	9e-05	0.011146	0.011236	1.2e-05	14578.4	229.08	0	1	1	0.0097	0.11182	1.45784
140700	2010	142710	晋中市	0.02	1.96	0.614844	0.006536	0.57646	0.01	11015	187842	942067	191	0.06	0.157808	0.537184	0.155835	0.01	0.0332108	9.2e-05	0.020164	0.020223	1.5e-05	16319.1	227.24	0	1	1	0.0131	0.13497	1.63191
140700	2011	142711	晋中市	0.02	1.97	0.686671	0.006507	0.61778	0.01	11367	208703	1000000	212	0.08	0.173211	0.50607	0.161059	0.02	0.0363383	0.000369	0.015616	0.015984	0.000253	18946.6	227.58	0	1	1	0.0174	0.15571	1.89466
140700	2012	142712	晋中市	0.01	1.98	0.763863	0.012004	0.68327	0.01	12703	210378	1100000	233	0.09	0.181172	0.555171	0.165154	0.02	0.0392007	9.5e-05	0.011117	0.011177	0.00054	21463.7	227.44	0	1	1	0.0252	0.24501	2.14637
140700	2013	142713	晋中市	0.02	2.02	0.889502	0.018406	1.19071	0.01	13397	240100	1200000	282	0.1	0.208988	0.538916	0.17151	0.01	0.0412652	0.000244	0.017739	0.01789	0.009581	23588.6	227.72	0	1	1	0.0209	0.328818	2.35886
140700	2014	142714	晋中市	0.04	2.02	0.987244	0.035303	1.39785	0.01	13397	231714	1300000	296	0.12	0.208253	0.541911	0.181762	0.02	0.0432611	0.000626	0.038945	0.039513	0.000259	25652.2	231.71	0	1	1	0.026	0.40039	2.56522
140700	2015	142715	晋中市	0.02	2.01	1.15045	0.037077	1.62846	0.01	13550	218067	1500000	302	0.13	0.230534	0.415662	0.193141	0.04	0.0447914	0.001595	0.016766	0.017441	9.1e-05	27524.8	234.97	0	1	1	0.0341	0.5018	2.75248
140700	2016	142716	晋中市	0.03	2.01	1.26466	0.03787	1.76197	0.01	13657	224155	1600000	308	0.14	0.226532	0.407819	0.198319	0.02	0.0454992	0.000134	0.030091	0.030184	1.5e-05	29148.7	236.19	0	1	1	0.0437	0.63351	2.91487
140700	2017	142717	晋中市	0	2.01	1.22961	0.038595	1.8277	0.01	13731	225624	1800000	331	0.15	0.217074	0.423272	0.191416	0.03	0.0465972	0.000137	0.002889	0.002081	0.000945	30926.8	235.96	0	1	1	0.0668	0.792763	3.09268
140700	2018	142718	晋中市	0.02	2.01	1.275	0.034882	1.92443	0.01	13783	221324	1900000	380	0.16	0.222876	0.467433	0.197818	0	0.0506602	0.002174	0.022261	0.024187	3.7e-05	32947	235.73	0	1	1	0.0718	0.97894	3.2947
140700	2019	142719	晋中市	0.05	2.01	1.3986	0.020831	2.00928	0.01	13819	947939	2100000	373	0.16	0.25415	0.439304	0.206978	0.02	0.052229	0.006937	0.044276	0.051011	0.000202	35187.4	238.36	0	1	1	0.0958	1.15906	3.51874
140700	2020	142720	晋中市	0.02	2.01	1.4591	0.02301	2.21476	0.01	13843	599922	2300000	383	0.17	0.272394	0.421626	0.209863	0.05	0.0540026	0.001274	0.014734	0.013969	0.002039	36578	238.41	0	1	1	0.109	0.44727	3.6578
140700	2021	142721	晋中市	0.01	2.01	1.3423	0.021459	2.6142	0.01	13861	251906	2500000	393	0.18	0.198925	0.466352	0.21015	0.02	0.0586686	0.000581	0.013829	0.013301	0.00111	39189	231.55	0	1	1	0.1084		3.9189
140700	2022	142722	晋中市	0.01	2.01	1.27791	0.022536	2.58286	0.01	13872	272818	2700000	398	0.18	0.196057	0.451739	0.208971	0.01	0.0631939	0.0006	0.00462	0.004751	0.000127	41188	228.58	0	1	1	0.0865	0.400997	4.1188
140700	2023	142723	晋中市	0	2.01	1.44059	0.021774	2.59741	0.01	13881	298358	2900000	401	0.19	0.210188	0.4427	0.215128	0.01	0.06439	0.00104	0.001841	0.002217	0.000664	42877	230.35	0	1	1	0.1053		4.2877
140800	2003	142803	运城市	0	2.28	1.09505	0.003642	0.052	0	3122	147047	1800000	65	0.02	0.095093	0.427979	0.093213		0.0152917	0	0.003829	2.7e-05	6e-06	6920.79	211.15	0	1	1	0.0074	0.038	0.692079
140800	2004	142804	运城市	0.01	3.52	0.97543	0.001913	0.1041	0	3392	148510	1900000	92	0.03	0.100694	0.327768	0.093578	0	0.0159694	0	0.007357	0.001438	1.1e-05	7608.44	211.31	0	1	1	0.0085	0.052	0.760844
140800	2005	142805	运城市	0	3.5	0.791581	0.002547	0.17623	0	3591	184000	2000000	113	0.03	0.092539	0.422481	0.117298	0.01	0.0206621	2.9e-05	0.003072	0.002747	0.001234	8568.58	219.86	0	1	1	0.0051	0.058	0.856858
140800	2006	142806	运城市	0	3.53	0.75565	0.004759	0.17744	0	4379	203210	2000000	100	0.04	0.099211	0.390451	0.123996	0	0.0228002	5e-06	9.1e-05	9.1e-05	3e-07	9469.91	221	0	1	1	0.0071	0.07083	0.946991
140800	2007	142807	运城市	0.02	3.56	0.750115	0.00207	0.18044	0	4550	166854	2100000	191	0.04	0.116621	0.401526	0.144265	0	0.0286736	0	0.019968	0.01996	1.5e-05	11271.4	221.62	0	1	1	0.0091	0.10452	1.12714
140800	2008	142808	运城市	0.01	3.52	0.678868	0.025297	0.15225	0	4690	518000	2200000	232	0.05	0.134613	0.350736	0.148827	0.02	0.0300906	0.000874	0.009365	0.010235	0.000425	12616	221.1	0	1	1	0.0159	0.11493	1.2616
140800	2009	142809	运城市	0.01	3.55	0.663334	0.004215	0.18376	0	5839	567000	2300000	276	0.06	0.143266	0.253654	0.174509	0.01	0.0355802	0	0.005336	0.005336	0.00801	13266	222.89	0	1	1	0.016	0.12658	1.3266
140800	2010	142810	运城市	0.02	3.55	0.604109	0.005545	0.18231	0	6225	646000	2400000	303	0.08	0.162496	0.26433	0.178465	0.01	0.0378182	0	0.019953	0.019953	0.001366	14032	220.65	0	1	1	0.0201	0.157	1.4032
140800	2011	142811	运城市	0.02	3.64	0.594447	0.020089	0.18231	0	7021	263000	2400000	328	0.1	0.162799	0.246564	0.181511	0.02	0.0410444	9e-05	0.014767	0.014776	0.000184	16278.8	218.04	0	1	1	0.0204	0.19315	1.62788
140800	2012	142812	运城市	0.01	3.66	0.569352	0.020331	0.20682	0	7293	298000	2500000	388	0.13	0.180264	0.215639	0.192505	0.02	0.043405	1e-06	0.007522	0.007523	1e-06	18452.1	219.81	0	1	1	0.0389	0.23789	1.84521
140800	2013	142813	运城市	0.01	3.68	0.727273	0.001351	0.4639	0	8969	315000	2600000	398	0.16	0.201002	0.198203	0.19677	0.01	0.04481	1.2e-05	0.008504	0.008485	0.008074	20408	220.3	0	1	1	0.0359	0.28894	2.0408
140800	2014	142814	运城市	0.01	3.7	7.45017	0.001658	0.42914	0	10538	403000	2700000	426	0.21	0.198688	0.221083	0.200548	0.01	0.0465905	0	0.005472	0.005225	0.000562	22226.3	224.84	0	1	1	0.0417	0.34648	2.22263
140800	2015	142815	运城市	0.03	3.6	0.81294	0.001745	0.52265	0.01	11807	480000	2800000	442	0.27	0.235898	0.203274	0.193656	0.01	0.0430554	2e-05	0.026151	0.026081	0.000137	24048.9	228.68	0	1	1	0.0429	0.40358	2.40489
140800	2016	142816	运城市	0.01	3.57	0.828771	0.002229	0.55222	0.01	12865	812000	2900000	459	0.35	0.235478	0.20536	0.193176	0.03	0.0425578	0.00011	0.012143	0.012238	2.7e-05	25636.1	229.71	0	1	1	0.0543	0.53216	2.56361
140800	2017	142817	运城市	0.02	3.56	0.820138	0.006985	0.55342	0.01	13726	973000	3000000	523	0.45	0.226757	0.221453	0.188855	0.01	0.0416813	0.000319	0.02044	0.020673	8.6e-05	27302.5	230.99	0	1	1	0.0641	0.67042	2.73025
140800	2018	142818	运城市	0.03	3.56	0.766547	0.004379	0.53351	0.02	14414	261478	3100000	475	0.59	0.22381	0.238968	0.191697	0.02	0.0433695	0.000241	0.028516	0.028721	2.5e-06	29104.5	232.27	0	1	1	0.0786	0.83555	2.91045
140800	2019	142819	运城市	0.03	3.55	0.812374	0.001773	0.56615	0.02	14956	260272	3000000	455	0.76	0.239403	0.231506	0.202439	0.03	0.0461736	0.000481	0.0312	0.031366	0.000316	31240.6	232.69	0	1	1	0.1014	0.97682	3.12406
140800	2020	142820	运城市	0.03	3.55	0.882085	0.003092	0.62681	0.02	15379	273780	3200000	488	0.98	0.254052	0.21555	0.203321	0.03	0.0472286	0.000307	0.028194	0.028451	5.1e-05	32728.3	232.27	0	1	1	0.1185	0.26343	3.27283
140800	2021	142821	运城市	0	3.55	0.82916	0.00354	0.71345	0.03	15706	287289	3400000	520	1.3	0.194264	0.263685	0.197373	0.03	0.0503012	0.000207	0.000237	0.000338	0.000106	35291	226.38	0	1	1	0.0941	0.30743	3.5291
140800	2022	142822	运城市	0	3.55	0.877851	0.003658	0.75562	0.03	15958	316808	3600000	592	1.6	0.211335	0.232984	0.199915	0	0.052975	0.000283	0.000439	0.000618	9.4e-05	37479	226.31	0	1	1	0.0826	0.297582	3.7479
140800	2023	142823	运城市	0	3.55	1.0264	0.003687	0.70857	0.03	16151	326543	3800000	536	2.1	0.222821	0.240068	0.205318	0	0.0544518	0.000515	0.000633	0.001009	0.000139	39278	228.18	0	1	1	0.0967		3.9278
140900	2003	142903	忻州市	0	1.16	1.30791	0	0.07634	0	5866	26376	1200000	38	0	0.226428	0.258677	0.117974		0.0169501	2e-05	7e-06	0.053016	2e-05	5469.44	220.04	0	1	1	0.0012	0.0372	0.546944
140900	2004	142904	忻州市	0	1.19	1.33855	4.3e-05	0.0768	0	5897	27890	1200000	55	0.01	0.236429	0.258174	0.120171	0	0.0176857	5e-05	0.001388	0.001065	0.000256	6130.83	221.71	0	1	1	0.0016	0.056	0.613083
140900	2005	142905	忻州市	0	1.19	1.13095	5.9e-05	0.07189	0	6283	82753	1200000	68	0.01	0.224028	0.314371	0.145911	0	0.0202541	0	0.00021	0.00021	3e-07	6723.58	232.56	0	1	1	0.0012	0.062	0.672358
140900	2006	142906	忻州市	0	1.19	1.02842	6.3e-05	0.072	0	6510	83834	1200000	79	0.01	0.247885	0.345932	0.142814	0	0.0208676	1.5e-05	0.002932	0.002947	5.2e-05	7746.46	231.44	0	1	1	0.0021	0.0708	0.774646
140900	2007	142907	忻州市	0	1.19	0.910971	0.000222	0.0732	0	6585	85079	1200000	88	0.01	0.256478	0.351229	0.138905	0	0.0227076	1.2e-05	5e-07	1.2e-05	0.000178	9021.71	227.54	0	1	1	0.0029	0.0754	0.902171
140900	2008	142908	忻州市	0	1.21	0.766322	0.00038	0.07498	0	8575	86110	1200000	90	0.02	0.272964	0.346676	0.139624	0	0.0238749	1.2e-05	0	1.2e-05	0.000847	10571.6	227.64	0	1	1	0.0046	0.08308	1.05716
140900	2009	142909	忻州市	0	1.22	0.842015	0.006832	0.095	0	9618	89218	1200000	93	0.02	0.29207	0.328789	0.159342	0	0.0264238	0.000321	0.003553	0.003874	0.00036	11459.2	234.3	0	1	1	0.0064	0.08832	1.14592
140900	2010	142910	忻州市	0	1.22	0.805564	0.001444	0.1836	0	11420	145023	1200000	184	0.02	0.293925	0.32931	0.156842	0	0.0280794	0	1.1e-06	1.1e-06	0.008	13957.6	231.88	0	1	1	0.0091	0.10375	1.39576
140900	2011	142911	忻州市	0.02	1.23	0.740589	0.001678	0.1825	0	11347	161000	1200000	222	0.02	0.27448	0.351963	0.152999	0	0.0305781	0	0.016797	0.016797	3.3e-05	16041.3	227.64	0	1	1	0.0117	0.12032	1.60413
140900	2012	142912	忻州市	0.01	1.23	0.772623	0.001963	0.20691	0	12361	181000	1200000	263	0.02	0.292343	0.35898	0.160969	0.02	0.0342936	3e-05	0.00901	0.00904	0.008141	18212.9	228.95	0	1	1	0.016	0.15183	1.82129
140900	2013	142913	忻州市	0	1.24	0.890529	0.000494	0.18925	0	13249	183000	1100000	268	0.02	0.325581	0.345745	0.181522	0.01	0.03925	1.2e-05	0.000356	0.000367	0.0001	20016	229.63	0	1	1	0.0197	0.195163	2.0016
140900	2014	142914	忻州市	0.01	1.24	0.947106	0.00432	0.1893	0	14307	181000	1200000	271	0.02	0.314478	0.377714	0.192501	0	0.0412656	0.000726	0.011244	0.01197	0.000105	21734.6	232.36	0	1	1	0.012	0.24075	2.17346
140900	2015	142915	忻州市	0.03	1.22	1.04948	0.00428	0.20251	0	15014	169902	1100000	271	0.02	0.355252	0.304345	0.201514	0.01	0.0424627	2.2e-05	0.032159	0.03209	0.00055	23451.6	235.6	0	1	1	0.011	0.2891	2.34516
140900	2016	142916	忻州市	0.01	1.21	1.086	0.003321	0.26944	0	15622	406000	1300000	273	0.02	0.345676	0.279711	0.177027	0.03	0.035927	1.5e-05	0.013764	0.013778	1e-06	24987.2	237.21	0	1	1	0.0173	0.34109	2.49872
140900	2017	142917	忻州市	0.01	1.2	0.945549	0.004344	0.27035	0	16141	169700	1100000	295	0.02	0.33237	0.252041	0.17218	0.01	0.0367662	6.3e-05	0.010515	0.010543	3.5e-05	26536.4	236.95	0	1	1	0.0239	0.421425	2.65364
140900	2018	142918	忻州市	0.02	1.19	0.928976	0.004685	0.22525	0	16581	210000	1500000	297	0.02	0.317227	0.259622	0.176318	0.01	0.0390187	0.00026	0.014336	0.014594	3.6e-05	28340.9	236.69	0	1	1	0.0247	0.52308	2.83409
140900	2019	142919	忻州市	0.01	1.19	1.04768	0.003006	0.28474	0	16952	161561	1300000	316	0.02	0.370274	0.245084	0.188967	0.02	0.0445461	1e-05	0.013522	0.013226	0.000306	30375.1	238.29	0	1	1	0.0273	0.627386	3.03751
140900	2020	142920	忻州市	0.01	1.19	1.10138	0.003429	0.29385	0	17263	172810	1400000	314	0.02	0.391143	0.233242	0.190243	0.01	0.0415917	0.000129	0.006248	0.006265	0.000112	31920	239.38	0	1	1	0.0408	0.32267	3.192
140900	2021	142921	忻州市	0	1.18	0.924898	0.003352	0.29649	0	17524	184059	1500000	311	0.02	0.292819	0.299692	0.192878	0.01	0.0485751	5e-06	0.000795	0.000367	0.000432	34566	231.06	0	1	1	0.0427		3.4566
140900	2022	142922	忻州市	0	1.18	0.946203	0.003365	0.29532	0	17742	196000	1600000	313	0.02	0.288848	0.348924	0.192691	0	0.0500589	1e-05	0.000229	0.000112	1.5e-05	36467	229.69	0	1	1	0.0377	0.323509	3.6467
140900	2023	142923	忻州市	0	1.18	1.14808	0.003363	0.29524	0	17923	188960	1700000	314	0.02	0.315618	0.324011	0.197751	0	0.0507195	3.7e-05	0.000186	0.000174	4.8e-05	38108	230.52	0	1	1	0.0477		3.8108
141000	2003	143003	临汾市	0.06	2.03	0.906631	0.000792	0.3775	0	11363	48241	1100000	72	0.02	0.108327	0.425094	0.106669		0.0176993	0.049236	0.007571	0.047521	5.4e-07	6016.69	216.97	0	1	1	0.0024	0.0279	0.601669
141000	2004	143004	临汾市	0	2.05	0.763633	0.000438	0.20678	0	10184	54822	1100000	88	0.02	0.11682	0.448596	0.104016	0.06	0.0180227	0.001035	3.1e-05	0.077358	8e-07	7131.01	215.94	0	1	1	0.0012	0.0509	0.713101
141000	2005	143005	临汾市	0.01	2.03	0.575524	0.000303	0.25317	0	11585	61488	1100000	110	0.03	0.109461	0.511039	0.11304	0	0.020052	2.8e-06	0.010147	0.010147	3e-08	8213.14	222.88	0	1	1	0.0036	0.0616	0.821314
141000	2006	143006	临汾市	0.02	2.06	0.5732	0.00403	0.24026	0	11774	183830	1100000	120	0.03	0.1255	0.540439	0.119449	0.01	0.0221783	0.00063	0.01715	0.017746	4e-05	9312.49	223.29	0	1	1	0.0033	0.0757	0.931249
141000	2007	143007	临汾市	0	2.11	0.548599	0.005187	0.34077	0	11440	201838	1100000	159	0.04	0.137484	0.520865	0.124829	0.02	0.0246742	0	0.004422	0.004422	0.005872	10576.2	222.62	0	1	1	0.0038	0.08364	1.05762
141000	2008	143008	临汾市	0.01	2.13	0.481429	0.013033	0.34248	0	11366	207232	1200000	184	0.05	0.144998	0.495531	0.131464	0	0.027231	0	0.006716	0.005716	0.000217	11919.3	223.45	0	1	1	0.0077	0.09213	1.19193
141000	2009	143009	临汾市	0.01	2.16	0.561568	0.01165	0.36324	0	10620	616325	1200000	213	0.06	0.170924	0.480033	0.136549	0.01	0.027124	5e-07	0.00878	0.008781	0.0001	13101.6	227.14	0	1	1	0.008	0.09885	1.31016
141000	2010	143010	临汾市	0.03	2.16	0.617798	0.007757	0.38337	0	12222	612162	1200000	290	0.07	0.179482	0.472188	0.140018	0.01	0.0295223	0	0.027441	0.027441	0.009469	14880	225.7	0	1	1	0.0146	0.11722	1.488
141000	2011	143011	临汾市	0.01	2.17	0.579703	0.009033	0.39579	0	13019	301497	1200000	339	0.1	0.164715	0.476179	0.147127	0.03	0.0340334	0.0009	0.01148	0.01168	0.001268	17441.6	222.81	0	1	1	0.0172	0.13653	1.74416
141000	2012	143012	临汾市	0.01	2.1	0.613859	0.013611	0.41359	0	14097	307616	1200000	364	0.12	0.182368	0.49746	0.151932	0.01	0.0383685	3e-05	0.007418	0.007426	0.006278	19782.7	223.58	0	1	1	0.0207	0.17398	1.97827
141000	2013	143013	临汾市	0	2.11	0.690997	0.01388	0.43263	0	14638	338800	1300000	394	0.15	0.216736	0.445403	0.158898	0.01	0.0388158	1.9e-05	0.004654	0.004654	0.000601	21820.3	224.88	0	1	1	0.0244	0.213438	2.18203
141000	2014	143014	临汾市	0	2.12	0.777589	0.014913	0.44305	0	15343	408910	1300000	397	0.2	0.233326	0.417771	0.171657	0	0.0423716	7.3e-05	0.003815	0.00363	3e-05	23609.5	229	0	1	1	0.0275	0.26267	2.36095
141000	2015	143015	临汾市	0.02	2.13	0.929455	0.01566	0.44675	0	15845	478778	1400000	396	0.25	0.24763	0.306691	0.183068	0	0.0415593	4.7e-05	0.016264	0.016174	0.008512	25498.3	234.82	0	1	1	0.0383	0.3176	2.54983
141000	2016	143016	临汾市	0.01	2.13	0.981907	0.016661	0.47585	0	16238	769476	1500000	411	0.32	0.258019	0.276518	0.190056	0.02	0.0427717	1.2e-05	0.013321	0.013305	3.8e-05	27085.3	236.52	0	1	1	0.0382	0.40241	2.70853
141000	2017	143017	临汾市	0.01	2.14	0.954169	0.017808	0.43766	0	16544	569780	1700000	415	0.41	0.253227	0.290405	0.189767	0.01	0.0436639	5.8e-05	0.008873	0.008882	4.9e-05	28872.9	238.305	0	1	1	0.0506	0.525137	2.88729
141000	2018	143018	临汾市	0.03	2.14	0.990316	0.018708	0.42607	0	16781	679832	2000000	446	0.52	0.267994	0.32654	0.198215	0.01	0.04636	5.8e-05	0.025927	0.02595	1e-05	30691.9	240.09	0	1	1	0.0589	0.6876	3.06919
141000	2019	143019	临汾市	0.03	2.14	1.13924	0.000923	0.42917	0	16965	794617	2100000	443	0.67	0.283003	0.335751	0.206447	0.03	0.0483164	0.000423	0.028322	0.028625	0.00012	32894.9	241.42	0	1	1	0.0553	0.834259	3.28949
141000	2020	143020	临汾市	0.03	2.14	1.20348	0.000881	0.41707	0	17105	731086	2300000	456	0.85	0.291935	0.307922	0.211468	0.03	0.0499987	9.5e-05	0.033344	0.033279	0.00016	34408	241.06	0	1	1	0.0755	0.33995	3.4408
141000	2021	143021	临汾市	0	2.14	1.07293	0.000879	0.22721	0	17214	764359	2400000	468	1.1	0.215754	0.388202	0.205782	0.03	0.0537166	5e-05	0.000567	0.00024	0.000377	36968	233.36	0	1	1	0.0688		3.6968
141000	2022	143022	临汾市	0	2.14	1.05573	0.000878	0.26828	0	17296	746404	2600000	454	1.4	0.225521	0.39923	0.202105	0	0.0570515	1.3e-05	0.00027	0.000189	0.000262	39075	229	0	1	1	0.0641	0.310346	3.9075
141000	2023	143023	临汾市	0	2.14	1.19497	0.000878	0.30936	0	17360	755941	2700000	478	1.8	0.23534	0.365538	0.21088	0	0.059921	0.000906	0.00026	0.000619	0.000547	41185	230.33	0	1	1	0.0705		4.1185
141100	2003	143103	吕梁市	0.05	1.66	0.899054	0.000327	0.07939	0	3664	63307	318987	43	0.01	0.194302	0.304573	0.097866		0.012035	0.000163	0.047358	0.000629	2e-06	6393.65	218	0	1	1	0.0002	0.01307	0.639365
141100	2004	143104	吕梁市	0.08	1.67	0.778215	0.000838	0.09877	0	5318	129364	352040	56	0.01	0.192883	0.343107	0.095008	0.05	0.0129349	0.076041	0.001321	0.076207	2.8e-06	7152.69	215.37	0	1	1	0.001	0.0205	0.715269
141100	2005	143105	吕梁市	0.01	1.68	0.481423	0.001348	0.13328	0	5990	94546	389560	67	0.02	0.146274	0.411934	0.102539	0.08	0.0153416	0	0.005668	0.005668	5e-07	8095.06	221.29	0	1	1	0.0011	0.0254	0.809506
141100	2006	143106	吕梁市	0.01	1.72	0.430938	0.015799	0.14761	0	5693	138736	432268	93	0.03	0.142338	0.444544	0.118358	0.01	0.0208802	0	0.011643	0.011643	2.4e-05	9185.96	221.86	0	1	1	0.0037	0.032	0.918596
141100	2007	143107	吕梁市	0	1.74	0.38429	0.014123	0.15884	0	8208	157224	481016	128	0.04	0.148639	0.507974	0.123906	0.01	0.0234069	0	0.003744	0.003743	0.000252	10678.6	220.22	0	1	1	0.0021	0.03598	1.06786
141100	2008	143108	吕梁市	0.01	1.77	0.31446	0.01462	0.15892	0	8797	158221	536819	156	0.06	0.161031	0.543503	0.12458	0	0.0258186	0	0.007466	0.003112	0.002953	12696.9	219.75	0	1	1	0.0054	0.04388	1.26969
141100	2009	143109	吕梁市	0	1.79	0.430787	0.003546	0.14271	0	8013	531100	600887	170	0.08	0.199118	0.490417	0.139018	0.01	0.0275683	0	0.0012	0.0012	0.008	13706.7	222.97	0	1	1	0.0062	0.05067	1.37067
141100	2010	143110	吕梁市	0.01	1.81	0.480299	0.018352	0.16321	0	9148	523502	674665	228	0.11	0.178586	0.483163	0.141104	0	0.0319169	0	0.006002	0.006002	0.008008	13901.1	219.49	0	1	1	0.0045	0.06523	1.39011
141100	2011	143111	吕梁市	0.02	1.83	4.61259	0.019185	0.16321	0	10030	241651	759891	260	0.15	0.16782	0.529658	0.135762	0.01	0.0336399	0	0.021412	0.021412	0.000722	15856.9	216.78	0	1	1	0.0132	0.09692	1.58569
141100	2012	143112	吕梁市	0.01	1.85	6.19303	0.031977	0.1605	0	10701	245443	858656	274	0.21	0.200317	0.575921	0.142929	0.02	0.041226	3e-05	0.009828	0.009838	9.9e-05	18202.9	216.83	0	1	1	0.0125	0.1334	1.82029
141100	2013	143113	吕梁市	0.02	1.85	0.653629	0.03226	0.19749	0	10956	228115	973486	303	0.3	0.237907	0.561007	0.138408	0.01	0.0380211	0	0.02176	0.02176	0.001302	20005	217.86	0	1	1	0.0119	0.168804	2.0005
141100	2014	143114	吕梁市	0.02	1.84	0.780499	0.004309	0.21684	0	11498	326876	1100000	316	0.42	0.239533	0.495089	0.139937	0.02	0.034376	0.000837	0.014135	0.014712	8e-05	21485.4	224.37	0	1	1	0.0125	0.21501	2.14854
141100	2015	143115	吕梁市	0.01	1.82	0.93152	0.003301	0.229	0	11814	374181	1300000	313	0.59	0.286685	0.330932	0.151506	0.02	0.0339472	1e-05	0.008092	0.007552	0.000193	22903.4	230.78	0	1	1	0.0142	0.2678	2.29034
141100	2016	143116	吕梁市	0.04	1.81	0.955404	0.002293	0.23	0	11695	314407	1400000	286	0.82	0.277152	0.324808	0.159167	0.01	0.03585	0.000101	0.039452	0.039552	0.000502	24180.5	232.43	0	1	1	0.0189	0.34438	2.41805
141100	2017	143117	吕梁市	0.02	1.8	0.790519	0.001285	0.19308	0	11739	382880	1700000	355	1.1	0.240685	0.440044	0.152411	0.04	0.0378663	0.000125	0.016999	0.016949	0.000175	25703.9	230.83	0	1	1	0.0294	0.456985	2.57039
141100	2018	143118	吕梁市	0.01	1.79	0.804686	0.088616	0.19195	0.01	11723	1200000	2000000	341	1.6	0.28856	0.426507	0.15353	0.02	0.0404269	0.0002	0.013786	0.013976	0.00859	27323.2	229.23	0	1	1	0.0337	0.58485	2.73232
141100	2019	143119	吕梁市	0.03	1.79	0.793259	0.014139	0.19232	0.01	11729	2200000	2100000	323	2.2	0.284829	0.447367	0.161912	0.01	0.0428456	1.6e-05	0.025953	0.025754	0.000215	29181.2	230.06	0	1	1	0.0501	0.695211	2.91812
141100	2020	143120	吕梁市	0.02	1.78	0.825666	0.031995	0.19437	0.01	11726	1600000	2400000	344	3.1	0.299831	0.406072	0.164957	0.03	0.0431719	0.000269	0.01724	0.017237	0.000272	30382	229.71	0	1	1	0.0575	0.263877	3.0382
141100	2021	143121	吕梁市	0	1.78	0.66247	0.020759	0.20062	0.01	11727	909922	2600000	366	4.4	0.196378	0.569897	0.167352	0.02	0.0494972	1e-05	7.1e-05	8.1e-05	0.000362	32551	223.63	0	1	1	0.0575		3.2551
141100	2022	143122	吕梁市	0	1.78	0.64883	0.026106	0.2036	0.01	11727	258902	2800000	378	6.2	0.228203	0.61987	0.169551	0	0.055749	2.4e-05	0.000311	0.00032	0.00618	34243	220.45	0	1	1	0.0526	0.170072	3.4243
141100	2023	143123	吕梁市	0	1.78	0.753228	0.023121	0.20449	0.02	11727	267212	3000000	382	8.6	0.263304	0.532282	0.174754	0	0.0566581	3.5e-05	0.000125	0.000155	5.4e-06	35339	222.37	0	1	1	0.057		3.5339
150100	2003	152103	呼和浩特市	0	1.24	0.956327	0.010546	0.89837	0	4155	177429	487905	96	0.01	0.103451	0.489695	0.171443		0.0305054	0	0.000629	0.000663	0.000655	8230.44	237.66	1	1	1	0.0045	0.01855	0.823044
150100	2004	152104	呼和浩特市	0.08	1.25	0.944129	0.02394	1.15308	0.01	5543	229719	532514	94	0.01	0.103141	0.540792	0.180074	0	0.0339069	0.000511	0.075707	9.4e-05	1.6e-05	10165.9	239.25	1	1	1	0.006	0.0259	1.01659
150100	2005	152105	呼和浩特市	0.03	1.24	1.1752	0.040345	1.35675	0.01	6540	293722	582738	117	0.02	0.081971	0.589445	0.199148	0.08	0.0384896	0.029446	0.001931	0.031277	0.011	12149.8	248.97	1	1	1	0.0045	0.0392	1.21498
150100	2006	152106	呼和浩特市	0	1.25	0.691764	0.048323	1.50763	0.01	7663	372849	639434	154	0.02	0.083879	0.602929	0.20517	0.03	0.0418881	0.002257	0.00088	0.003016	2.2e-05	14054.9	248.48	1	1	1	0.0087	0.0483	1.40549
150100	2007	152107	呼和浩特市	0.02	1.28	1.0721	0.060322	1.64998	0.01	7976	491635	703612	135	0.02	0.091282	0.576658	0.21221	0	0.0471723	0.016558	0.005513	0.015647	5e-06	16920.1	249.96	1	1	1	0.0125	0.0614	1.69201
150100	2008	152108	呼和浩特市	0.01	1.3	1.10805	0.070744	1.84471	0.01	9577	615798	776468	162	0.03	0.101172	0.617557	0.222519	0.02	0.0526393	0.002527	0.009935	0.011273	0.000327	20269	249.45	1	1	1	0.0197	0.06364	2.0269
150100	2009	152109	呼和浩特市	0.07	1.32	1.19859	0.077576	2.03891	0.01	8184	668008	859417	252	0.03	0.100462	0.64662	0.250125	0.01	0.0611622	0.042715	0.02245	0.049074	1e-07	22397	253.41	1	1	1	0.0179	0.07087	2.2397
150100	2010	152110	呼和浩特市	0.15	1.33	1.35204	0.083676	2.15275	0.01	9659	787921	954143	276	0.04	0.09502	0.715037	0.245674	0.07	0.0640146	0.099769	0.054665	0.105016	0.008	25174.2	252.81	1	1	1	0.028	0.082779	2.51742
150100	2011	152111	呼和浩特市	0.09	1.33	1.47057	0.088559	2.22278	0.01	10100	376024	1100000	330	0.04	0.117426	0.592273	0.266436	0.15	0.0726203	0.012165	0.080691	0.091777	8.2e-06	28877.3	252.66	1	1	1	0.04	0.09319	2.88773
150100	2012	152112	呼和浩特市	0.06	1.32	1.49752	0.061694	2.2719	0.02	14733	419716	1200000	371	0.05	0.111215	0.648863	0.277691	0.09	0.0784053	0.041539	0.017779	0.035925	0.002822	32646	252.81	1	1	1	0.04	0.102892	3.2646
150100	2013	152113	呼和浩特市	0.05	1.36	1.57656	0.080688	2.29258	0.02	17971	447052	1300000	400	0.06	0.10878	0.617354	0.307569	0.06	0.0879543	0.038814	0.012648	0.041881	0.000101	32003	257.08	1	1	1	0.0552	0.11585	3.2003
150100	2014	152114	呼和浩特市	0.07	1.38	1.77809	0.058847	2.32481	0.02	20598	476957	1500000	390	0.06	0.10743	0.68039	0.298658	0.05	0.0858745	0.008321	0.058976	0.066736	1e-06	34723	261.04	1	1	1	0.0682	0.129244	3.4723
150100	2015	152115	呼和浩特市	0.06	1.39	1.96533	0.04461	2.35188	0.02	22961	565564	1700000	336	0.07	0.116694	0.685999	0.328025	0.07	0.0949912	0.026232	0.035434	0.053154	0.000307	37362	262.78	1	1	1	0.0832	0.141218	3.7362
150100	2016	152116	呼和浩特市	0.03	1.39	2.22204	0.087935	2.37734	0.03	25595	731647	1900000	320	0.08	0.132334	0.642071	0.335166	0.06	0.0993992	0.006288	0.02505	0.0313	0.000178	40220	264	1	1	1	0.1003	0.162123	4.022
150100	2017	152117	呼和浩特市	0.09	1.39	2.51634	0.036775	2.3933	0.03	28531	608024	2200000	438	0.09	0.132641	0.499961	0.338754	0.03	0.0988572	0.036255	0.052389	0.071644	0.017	43518	263.97	1	1	1	0.1277	0.191558	4.3518
150100	2018	152118	呼和浩特市	0.08	1.39	2.74023	0.019928	2.40266	0.04	31804	988350	2600000	483	0.1	0.122865	0.573863	0.340917	0.09	0.10153	0.019783	0.055571	0.066764	0.000381	46565	263.94	1	1	1	0.2018	0.223662	4.6565
150100	2019	152119	呼和浩特市	0.09	1.39	3.05045	0.025733	2.43175	0.04	35452	1900000	2800000	459	0.11	0.14974	0.486013	0.333851	0.08	0.0969891	0.057268	0.029156	0.068867	0.018	49397	261.36	1	1	1	0.2414	0.319487	4.9397
150100	2020	152120	呼和浩特市	0.04	1.39	3.17729	0.022701	2.48552	0.05	39517	1100000	3000000	474	0.13	0.156576	0.495025	0.337356	0.09	0.0951284	0.014486	0.028426	0.038517	0.004394	49789	260.78	1	1	1	0.2996	0.182036	4.9789
150100	2021	152121	呼和浩特市	0.01	1.39	3.06589	0.024722	2.55165	0.06	44049	417422	3300000	489	0.15	0.134813	0.544087	0.338392	0.04	0.0977221	0.00593	0.000948	0.006516	5.5e-05	53026	256.57	1	1	1	0.3144	0.26385	5.3026
150100	2022	152122	呼和浩特市	0.02	1.39	3.17192	0.023328	2.67396	0.06	49099	403826	3500000	451	0.16	0.126457	0.548419	0.340092	0.01	0.0996456	0.015528	0.001457	0.016724	0.001	54616	254.64	1	1	1	0.2792	0.139901	5.4616
150100	2023	152123	呼和浩特市	0	1.39	2.98323	0.024267	2.59301	0.07	54728	478000	3800000	471	0.18	0.155963	0.401467	0.355627	0.02	0.111819	0.000792	0.002852	0.002948	0.000696	57085	254.99	1	1	1	0.3729		5.7085
150200	2003	152203	包头市	0	0.86	0.553342	0.012143	0.28836	0.06	15638	155306	861141	68	0.03	0.101725	0.566024	0.179872		0.0333929	0.0006	6.3e-05	3e-07	1e-07	9216.4	232.18	0	1	1	0.0055	0.0151	0.92164
150200	2004	152204	包头市	0	0.76	0.449836	0.025	0.34109	0.06	17892	221960	970262	84	0.03	0.10015	0.68311	0.185014	0	0.0370276	1.4e-05	0.000336	5e-05	0.000969	11501.9	232.14	0	1	1	0.0045	0.0233	1.15019
150200	2005	152205	包头市	0.02	0.75	0.396799	0.0408	0.46072	0.06	20492	267729	1100000	102	0.04	0.088847	0.774756	0.203036	0	0.0416986	0.002403	0.014313	0.015482	8.4e-05	13218.2	238.66	0	1	1	0.0086	0.0294	1.32182
150200	2006	152206	包头市	0	0.76	0.477649	0.054067	0.55276	0.06	23627	332569	1200000	142	0.05	0.09699	0.689326	0.209477	0.02	0.0456094	0.000356	0.000194	0.000341	7.5e-07	15121.6	237.84	0	1	1	0.0113	0.0366	1.51216
150200	2007	152207	包头市	0.01	0.77	0.426382	0.061557	0.60269	0.06	28323	439319	1400000	169	0.05	0.089571	0.670873	0.229338	0	0.0539913	0.001344	0.005788	0.006845	0.007008	17875.7	240.47	0	1	1	0.011	0.0419	1.78757
150200	2008	152208	包头市	0	0.78	0.358666	0.0815	0.68315	0.05	38841	542704	1600000	176	0.05	0.087027	0.629901	0.230961	0.01	0.0605069	0.000103	0.004779	0.004861	4.6e-05	20860.9	236.04	0	1	1	0.0127	0.0438	2.08609
150200	2009	152209	包头市	0.07	0.79	0.375344	0.0949	0.83349	0.05	22493	690803	1800000	224	0.06	0.090171	0.666341	0.248398	0	0.0673828	9e-06	0.069893	0.069805	0.003256	23089.3	239.69	0	1	1	0.0172	0.0525	2.30893
150200	2010	152210	包头市	0.04	0.79	0.421523	0.11	0.84502	0.05	28374	734389	2000000	266	0.06	0.08329	0.679068	0.258794	0.07	0.074073	7.5e-06	0.034791	0.034784	0.00801	25862.1	239.49	0	1	1	0.018	0.060151	2.58621
150200	2011	152211	包头市	0.03	0.8	0.425773	0.124	0.67514	0.05	32390	318669	2300000	294	0.07	0.083607	0.64415	0.27634	0.04	0.0847264	0.000163	0.024601	0.02457	9e-05	29628.2	238.28	0	1	1	0.0316	0.070093	2.96282
150200	2012	152212	包头市	0.01	0.8	0.416438	0.1365	0.68641	0.05	36275	274311	2600000	358	0.08	0.085379	0.638108	0.289111	0.03	0.0928164	8e-05	0.013835	0.013915	0.008	33488	238.44	0	1	1	0.0423	0.076933	3.3488
150200	2013	152213	包头市	0.03	0.81	0.465029	0.141	0.701	0.05	32434	268872	3000000	392	0.08	0.101415	0.605525	0.311278	0.01	0.100987	4.6e-05	0.026988	0.01896	2e-06	32694	241.67	0	1	1	0.0674	0.08423	3.2694
150200	2014	152214	包头市	0.01	0.81	0.504381	0.1119	0.70342	0.05	38089	277760	3400000	415	0.09	0.097266	0.662496	0.31516	0.03	0.102884	0.000329	0.009883	0.010107	0.005082	35506	244.17	0	1	1	0.0696	0.093474	3.5506
150200	2015	152215	包头市	0.03	0.81	0.589082	0.082417	0.7232	0.05	41392	261186	3900000	310	0.1	0.105662	0.641553	0.313576	0.01	0.1034	9.5e-05	0.032974	0.032876	9.5e-05	38098	245.2	0	1	1	0.0807	0.103616	3.8098
150200	2016	152216	包头市	0.01	0.81	0.621324	0.101035	0.80246	0.05	44980	273656	4500000	346	0.11	0.107135	0.654538	0.325989	0.03	0.10882	9e-05	0.007818	0.007406	5e-05	40955	246.97	0	1	1	0.0882	0.120925	4.0955
150200	2017	152217	包头市	0.03	0.82	0.868225	0.0204	0.75977	0.05	48878	265601	5200000	400	0.12	0.096876	0.416605	0.325768	0.01	0.103168	0.000246	0.030383	0.022223	0.008406	44231	249.355	0	1	1	0.0912	0.142763	4.4231
150200	2018	152218	包头市	0.02	0.82	1.01577	0.017713	0.76417	0.04	53113	232928	6100000	404	0.14	0.123491	0.391609	0.331806	0.03	0.102919	0.002668	0.02105	0.023337	0.001257	47407	251.74	0	1	1	0.1096	0.159612	4.7407
150200	2019	152219	包头市	0.02	0.83	1.10477	0.0181	0.76417	0.04	57713	221301	6700000	367	0.15	0.134315	0.416473	0.332135	0.02	0.10257	0.001124	0.014053	0.014549	0.000628	50427	252.66	0	1	1	0.1395	0.223954	5.0427
150200	2020	152220	包头市	0.02	0.83	0.898388	0.018277	0.86733	0.04	62710	222746	7600000	364	0.17	0.136106	0.382726	0.327273	0.02	0.0957481	0.000213	0.01986	0.01956	0.000513	50981	250.09	0	1	1	0.1747	0.118562	5.0981
150200	2021	152221	包头市	0	0.84	0.819929	0.018359	0.87236	0.04	68138	224190	8500000	361	0.18	0.101932	0.479806	0.332036	0.02	0.103484	9.3e-05	0.003173	0.00321	5e-06	54448	244.28	0	1	1	0.1854	0.170528	5.4448
150200	2022	152222	包头市	0.01	0.84	0.794736	0.018397	0.84643	0.04	74035	241477	9300000	361	0.2	0.105398	0.439255	0.329757	0	0.105993	0.006542	0.000181	0.000543	2e-07	56245	239.26	0	1	1	0.1894	0.10424	5.6245
150200	2023	152223	包头市	0	0.84	0.783156	0.018414	0.863	0.04	80439	258255	10000000	364	0.22	0.111398	0.422203	0.33888	0.01	0.114499	0.0005	6.2e-05	0.000519	4.4e-05	58663	238.03	0	1	1	0.224		5.8663
150300	2003	152303	乌海市	0	2.37	0.92683	0	0.06088	0	6921	15739	1200000	16	0	0.123761	0.419742	0.169918		0.0248071	0	3e-07	0.003554	6.9e-06	6745.22	223.36	0	1	1	0.0013	5e-05	0.674522
150300	2004	152304	乌海市	0	2.41	1.03971	0.001012	0.05176	0	9044	22035	1200000	22	0.01	0.122203	0.495123	0.174484	0	0.0262944	5e-05	0	1.5e-05	0.002509	8207.9	222.12	0	1	1	0.0006	0.0015	0.82079
150300	2005	152305	乌海市	0	2.46	0.761351	0.001507	0.05135	0	4554	27830	1200000	26	0.01	0.110611	0.634771	0.199682	0	0.0297367	0	0.000161	0.000161	0.002489	10006	232.75	0	1	1	0.0009	0.002	1.0006
150300	2006	152306	乌海市	0	2.47	0.729413	0.000147	0.02904	0	5436	33090	1200000	39	0.01	0.123526	0.654946	0.213595	0	0.0347769	1.5e-06	0.000109	0.00011	0.000886	11430.1	232.7	0	1	1	0.0017	0.0031	1.14301
150300	2007	152307	乌海市	0	2.72	0.640234	0.000298	0.03027	0	6902	37200	1200000	42	0.01	0.145864	0.743506	0.206404	0	0.03762	0	2.2e-05	2.2e-05	0.003004	13623.5	231.04	0	1	1	0.0009	0.0057	1.36235
150300	2008	152308	乌海市	0	2.75	0.600167	0.000651	0.02774	0	7532	49000	1200000	48	0.01	0.13107	0.57102	0.217151	0	0.0426076	0	5.8e-06	3e-07	2e-07	15999	230.53	0	1	1	0.0006	0.00425	1.5999
150300	2009	152309	乌海市	0.01	2.74	0.699084	0.001787	0.03682	0	6807	41147	1200000	54	0.02	0.176867	0.395672	0.222797	0	0.0473939	0	0.010398	0.010398	0.006454	17621.3	228.16	0	1	1	0.001	0.00663	1.76213
150300	2010	152310	乌海市	0.02	3.02	0.715431	0.002923	0.03975	0	7882	59200	1200000	93	0.02	0.162458	0.529784	0.221103	0.01	0.0499947	0	0.017659	0.017659	0.008	19741.1	225.38	0	1	1	0.0017	0.009333	1.97411
150300	2011	152311	乌海市	0.01	3.09	0.673157	0.005952	0.0359	0	9733	59200	1200000	102	0.02	0.161816	0.469238	0.228445	0.02	0.0553477	0	0.009162	0.009162	3e-05	22349	224.37	0	1	1	0.0013	0.010977	2.2349
150300	2012	152312	乌海市	0.01	3.13	0.677586	0.008976	0.03539	0	10544	74800	1300000	112	0.03	0.166309	0.581411	0.242208	0.01	0.0604712	1e-07	0.006061	0.006061	0.00827	25447	223.83	0	1	1	0.0023	0.012955	2.5447
150300	2013	152313	乌海市	0.01	3.15	0.833109	0.012	0.03054	0	12170	32400	1300000	105	0.03	0.15915	0.755164	0.260806	0.01	0.0664034	6e-05	0.008543	0.008503	0.000659	28802	231.24	0	1	1	0.0037	0.014553	2.8802
150300	2014	152314	乌海市	0	3.16	0.898628	0.0058	0.02821	0	8109	70636	1400000	90	0.03	0.157701	0.793003	0.261949	0.01	0.0658052	5e-05	0.000251	0.000271	3.7e-05	31481	234.02	0	1	1	0.0038	0.016422	3.1481
150300	2015	152315	乌海市	0	2.64	0.989242	0.000805	0.03536	0	8831	62685	1500000	76	0.04	0.189862	0.757128	0.265845	0	0.0663725	0.000186	4.8e-05	0.000234	0.000152	33968	240.32	0	1	1	0.0046	0.018488	3.3968
150300	2016	152316	乌海市	0.01	2.58	0.933002	0.0002	0.04806	0	8702	61037	1600000	81	0.05	0.232991	0.61171	0.268635	0	0.0680848	0	0.005453	0.005276	3e-06	36515	240.72	0	1	1	0.0087	0.020964	3.6515
150300	2017	152317	乌海市	0.01	2.54	1.14735	0.001291	0.0503	0	8724	61747	1800000	85	0.05	0.169246	0.801223	0.256328	0.01	0.0617037	5e-06	0.010495	0.010309	0.00019	39399.8	237.88	0	1	1	0.0092	0.029311	3.93998
150300	2018	152318	乌海市	0	2.51	1.16464	0.001317	0.05191	0	8720	59615	2000000	84	0.06	0.219865	0.37414	0.248558	0.01	0.0598733	0	0.000435	0.000435	0.000231	42301	235.04	0	1	1	0.0146	0.030142	4.2301
150300	2019	152319	乌海市	0	2.48	1.20944	0.001474	0.05915	0	8721	54587	2200000	79	0.07	0.186875	0.451426	0.254941	0	0.0629918	0.001003	0.001776	0.002769	1e-05	45010	234.92	0	1	1	0.0272	0.058237	4.501
150300	2020	152320	乌海市	0.02	2.46	0.937217	0.001302	0.06362	0	8721	56694	2300000	80	0.08	0.201096	0.477141	0.252679	0	0.0628665	0.000123	0.016225	0.016278	7e-05	45497	232.41	0	1	1	0.0339	0.042908	4.5497
150300	2021	152321	乌海市	0	2.45	0.658213	0.001316	0.06731	0	8721	58800	2300000	82	0.1	0.157846	0.55878	0.255139	0.02	0.0702762	0	0.000434	0.000429	0.00019	48637	226.28	0	1	1	0.0409	0.044271	4.8637
150300	2022	152322	乌海市	0	2.44	0.594517	0.001314	0.05188	0	8721	62672	2400000	92	0.11	0.147244	0.670427	0.25666	0	0.0735018	0	2e-06	2e-06	0.000354	50436	224.02	0	1	1	0.0342	0.033779	5.0436
150300	2023	152323	乌海市	0	2.43	0.77386	0.001315	0.04984	0	8721	73163	2400000	81	0.13	0.241132	0.498441	0.278208	0	0.0770901	5e-05	3.6e-05	7e-05	1.5e-05	52353	232.9	0	1	1	0.0397		5.2353
150400	2003	152403	赤峰市	0	0.5	0.72889	0.001063	0.04458	0	7537	80091	211870	59	0.01	0.190396	0.218627	0.109337		0.0190657	0	0.003554	0.000365	2.1e-06	6027.12	209.5	0	1	1	0.0044	0.0104	0.602712
150400	2004	152404	赤峰市	0	0.5	0.618025	0.000527	0.0689	0	7830	135390	231287	64	0.01	0.181667	0.22921	0.104948	0	0.0197728	1.5e-05	8e-07	2e-06	1e-06	6705.71	204.55	0	1	1	0.0056	0.0309	0.670571
150400	2005	152405	赤峰市	0	0.49	0.545171	0.000531	0.07748	0	8443	71034	253878	75	0.01	0.198925	0.229626	0.116918	0	0.0210006	0.003195	0.000169	0.003364	0.001163	7571.93	209.07	0	1	1	0.004	0.0339	0.757193
150400	2006	152406	赤峰市	0	0.5	0.526401	0.002511	0.09368	0	8900	82650	280309	106	0.01	0.193263	0.197985	0.117201	0	0.0217493	0	5.1e-06	5.1e-06	0.000279	8451.3	211.61	0	1	1	0.0061	0.0368	0.84513
150400	2007	152407	赤峰市	0	0.5	0.473778	0.002743	0.11445	0	8941	178131	311422	127	0.02	0.199529	0.239343	0.114957	0	0.0239751	5e-06	3.6e-05	2.5e-05	0.000348	10031.9	210.38	0	1	1	0.0046	0.041	1.00319
150400	2008	152408	赤峰市	0.01	0.5	0.415594	0.003224	0.12671	0	9348	210500	348281	192	0.02	0.202733	0.237528	0.11866	0	0.0263049	3e-07	0.009976	0.009551	2.5e-05	11538	210.97	0	1	1	0.005	0.04694	1.1538
150400	2009	152409	赤峰市	0.01	0.51	0.433271	0.005038	0.13893	0	9554	133097	392246	225	0.02	0.204916	0.244952	0.131482	0.01	0.0297786	2e-06	0.01395	0.01395	5e-06	12670.2	216.94	0	1	1	0.0062	0.03428	1.26702
150400	2010	152410	赤峰市	0.03	0.51	0.428944	0.005707	0.15057	0	11110	609517	445068	931	0.02	0.202338	0.256277	0.134315	0.01	0.0328808	4.5e-05	0.024777	0.023456	0.002324	14108.9	215.1	0	1	1	0.0111	0.038388	1.41089
150400	2011	152411	赤峰市	0.03	0.51	0.419502	0.003675	0.17235	0	10441	219500	509024	984	0.02	0.202045	0.226958	0.137626	0.03	0.0365255	1.2e-06	0.028574	0.028241	0.000222	16416.4	214.06	0	1	1	0.0138	0.045054	1.64164
150400	2012	152412	赤峰市	0.01	0.51	0.453531	0.001132	0.1785	0	13640	248824	587097	338	0.02	0.207488	0.22897	0.159979	0.03	0.0473984	0	0.013772	0.013232	0.004327	18678	213.38	0	1	1	0.0115	0.050819	1.8678
150400	2013	152413	赤峰市	0.01	0.52	0.510463	0.001	0.18756	0	12052	268067	683234	396	0.02	0.206268	0.262175	0.17262	0.01	0.0492671	0.000661	0.012916	0.012976	5e-07	21148	216.73	0	1	1	0.0167	0.056954	2.1148
150400	2014	152414	赤峰市	0.02	0.52	0.589343	0.002112	0.1971	0	15391	313509	802717	340	0.02	0.202682	0.271958	0.169455	0.01	0.0506991	0.00059	0.015938	0.016448	0.00172	23199	219.8	0	1	1	0.0201	0.063717	2.3199
150400	2015	152415	赤峰市	0.03	0.51	0.624914	0.00856	0.204	0	17006	263035	952681	433	0.02	0.222984	0.251973	0.190755	0.02	0.0540751	0.000236	0.031101	0.03103	1e-07	25195.4	221.82	0	1	1	0.0178	0.071032	2.51954
150400	2016	152416	赤峰市	0.04	0.51	0.714587	0.011217	0.21732	0	18790	277939	1100000	450	0.02	0.226997	0.254707	0.195611	0.03	0.05679	0.000115	0.038461	0.038526	0.000439	27336.3	221.76	0	1	1	0.0261	0.08659	2.73363
150400	2017	152417	赤峰市	0.02	0.51	0.949651	0.017	0.22591	0	20760	531100	1400000	423	0.02	0.26557	0.217678	0.200591	0.04	0.0569295	2e-05	0.019164	0.019023	0.000161	29660	225.26	0	1	1	0.0278	0.113245	2.966
150400	2018	152418	赤峰市	0.03	0.51	1.20563	0.038916	0.23088	0	22935	273944	1600000	439	0.02	0.329207	0.212136	0.217636	0.02	0.0611254	0.002712	0.025118	0.026573	0.000469	31931	228.76	0	1	1	0.0388	0.132031	3.1931
150400	2019	152419	赤峰市	0.03	0.51	1.17571	0.000957	0.23652	0.01	25336	281169	1800000	454	0.02	0.319217	0.202483	0.228203	0.03	0.0634806	0.000469	0.032391	0.032322	0.000539	34101	231.4	0	1	1	0.051	0.198301	3.4101
150400	2020	152420	赤峰市	0.02	0.51	1.22238	0.001523	0.24089	0.01	27986	297584	1900000	458	0.02	0.348542	0.192325	0.242442	0.03	0.0639164	0.00086	0.021889	0.021559	0.00119	34770	228.57	0	1	1	0.0765	0.138392	3.477
150400	2021	152421	赤峰市	0	0.51	1.23814	0.001983	0.25091	0.01	30913	314000	2000000	462	0.02	0.289451	0.221801	0.248308	0.02	0.0680765	5e-06	0.001279	0.001094	0.000203	37468	227	0	1	1	0.0744	0.161602	3.7468
150400	2022	152422	赤峰市	0	0.51	1.20549	0.002304	0.33844	0.01	34143	324724	2100000	469	0.02	0.266871	0.198645	0.249115	0	0.0702596	0.00113	0.00012	0.000251	0.000828	39416	223.44	0	1	1	0.0636	0.094955	3.9416
150400	2023	152423	赤峰市	0.01	0.51	1.33447	0.002509	0.32408	0.01	37709	336000	2300000	550	0.02	0.308581	0.178886	0.257455	0	0.0738452	0.004908	0.000901	0.001623	0.004186	41308	224.51	0	1	1	0.0773		4.1308
150500	2003	152503	通辽市	0	0.52	0.709624	0.001353	0.13625	0	5224	50267	1200000	52	0	0.132737	0.261755	0.107066		0.0171948	0	0.000365	0.005034	0.000163	6060.39	200.09	0	1	1	0.0022	0.0091	0.606039
150500	2004	152504	通辽市	0	0.52	0.691531	0.001761	0.1536	0	5794	59498	1300000	59	0.01	0.138718	0.265446	0.110831	0	0.0172196	0	4.8e-06	1e-06	2e-05	6863.87	208.38	0	1	1	0.0024	0.0109	0.686387
150500	2005	152505	通辽市	0.01	0.52	0.646067	0.00254	0.16013	0	6424	67665	1400000	65	0.01	0.149862	0.29223	0.123021	0	0.0187824	0	0.01299	0.01299	0.000139	7680.35	210.9	0	1	1	0.0033	0.0155	0.768035
150500	2006	152506	通辽市	0	0.52	0.625863	0.00362	0.1572	0	8024	73900	1500000	65	0.01	0.151353	0.272089	0.121825	0.01	0.0194089	0.003862	6.5e-06	0.003868	3.4e-05	8468.71	212.93	0	1	1	0.0031	0.0191	0.846871
150500	2007	152507	通辽市	0	0.53	0.493089	0.004788	0.15985	0	10921	90800	1700000	80	0.01	0.14138	0.285229	0.120645	0	0.022415	0	0.00031	0.00031	0.00015	10150	209.97	0	1	1	0.0042	0.0201	1.015
150500	2008	152508	通辽市	0	0.53	0.436467	0.0052	0.23259	0	13838	89000	1800000	168	0.01	0.162941	0.212168	0.128517	0	0.0268703	0	0.000158	0.000158	4e-05	11721	210.39	0	1	1	0.004	0.03707	1.1721
150500	2009	152509	通辽市	0.01	0.54	0.413086	0.002728	0.26814	0	8428	115500	1900000	161	0.02	0.158552	0.332631	0.133676	0	0.0305045	0.001366	0.004758	0.006113	0.000305	12811.6	212.32	0	1	1	0.0043	0.02392	1.28116
150500	2010	152510	通辽市	0	0.54	0.394354	0.002728	0.36014	0	14033	428500	2100000	206	0.02	0.156775	0.351465	0.127844	0.01	0.0318527	0.00074	0.003615	0.004355	0.00268	14263.1	210.08	0	1	1	0.0037	0.024801	1.42631
150500	2011	152511	通辽市	0.03	0.54	0.364863	0.004835	0.30997	0	10906	532500	2200000	290	0.02	0.147375	0.343059	0.14838	0	0.0437091	4.8e-05	0.026904	0.0267	1e-07	16548	209	0	1	1	0.0071	0.027005	1.6548
150500	2012	152512	通辽市	0.02	0.54	0.360705	0.006598	0.37779	0	10960	511000	2400000	299	0.02	0.151053	0.348929	0.154	0.03	0.0479648	7.6e-06	0.016989	0.016995	1.5e-06	18828	208.35	0	1	1	0.0086	0.030524	1.8828
150500	2013	152513	通辽市	0.01	0.54	0.394539	0.007047	0.29294	0	10754	388952	2600000	381	0.03	0.167426	0.347379	0.172062	0.02	0.0505874	0.0015	0.006648	0.008148	0.006141	21349	212.44	0	1	1	0.0085	0.03337	2.1349
150500	2014	152514	通辽市	0.01	0.46	0.390012	0.002215	0.44617	0	14538	189600	2800000	483	0.03	0.168648	0.355295	0.180922	0.01	0.0559885	0.003356	0.007596	0.01095	0.001779	23377	214.17	0	1	1	0.015	0.036409	2.3377
150500	2015	152515	通辽市	0.02	0.54	0.492035	0.002139	0.37052	0	16071	211072	3000000	360	0.04	0.193472	0.331718	0.187688	0.01	0.0564952	0.005586	0.018639	0.02413	2e-06	25364	219.75	0	1	1	0.0245	0.044451	2.5364
150500	2016	152516	通辽市	0.02	0.58	0.508732	0.001658	0.35835	0	17743	204593	3300000	343	0.04	0.183687	0.358405	0.187515	0.02	0.0582261	0	0.022672	0.022669	1.1e-05	27444	221.88	0	1	1	0.0162	0.05408	2.7444
150500	2017	152517	通辽市	0.02	0.6	0.642366	0.0002	0.34618	0	19565	220709	3500000	373	0.05	0.195011	0.22228	0.219473	0.02	0.0590405	0	0.023878	0.023853	2.5e-05	29667	226.39	0	1	1	0.0242	0.064218	2.9667
150500	2018	152518	通辽市	0.01	0.61	0.754333	0.000315	0.33402	0	21548	210991	4200000	384	0.05	0.288382	0.201102	0.226281	0.02	0.0572138	5e-05	0.010939	0.010758	4.1e-05	31936	230.9	0	1	1	0.0293	0.075832	3.1936
150500	2019	152519	通辽市	0.03	0.61	0.816535	0.003054	0.32185	0	23703	199008	4200000	359	0.06	0.299374	0.200937	0.224723	0.01	0.0571299	1e-05	0.033025	0.032646	0.000389	34127	223.68	0	1	1	0.0423	0.129408	3.4127
150500	2020	152520	通辽市	0.03	0.62	0.829144	0.005588	0.36274	0	26042	206984	4600000	350	0.07	0.302243	0.198205	0.228357	0.03	0.0584472	0.003532	0.02132	0.023591	0.001262	34782	222.24	0	1	1	0.0538	0.115832	3.4782
150500	2021	152521	通辽市	0	0.62	0.859717	0.004683	0.40363	0	28579	214959	5000000	342	0.08	0.266723	0.23367	0.229706	0.03	0.061126	0	0.000204	1e-06	0.000364	37475	219.91	0	1	1	0.0565	0.106673	3.7475
150500	2022	152522	通辽市	0	0.62	0.862996	0.004931	0.44452	0	31327	222700	5300000	408	0.09	0.269507	0.218223	0.2316	0	0.064374	5e-06	0.00017	0.000175	2.5e-05	39536.4	215.61	0	1	1	0.0575	0.072004	3.95364
150500	2023	152523	通辽市	0	0.62	0.96071	0.004857	0.39429	0	34299	238000	5700000	376	0.1	0.317776	0.196087	0.243287	0	0.0677487	0.000169	0.000126	0.000249	4.6e-05	41592	217.74	0	1	1	0.0595		4.1592
150600	2003	152603	鄂尔多斯市	0	0.16	0.625028	0.004604	0.01012	0.03	5715	41118	1800000	51	0.01	0.122545	0.443004	0.120411		0.0204767	1.3e-05	0	0.001597	0.000379	7204.19	216.74	0	1	1	0.0011	0.013	0.720419
150600	2004	152604	鄂尔多斯市	0	0.16	0.543816	0.005757	0.01036	0.03	14925	135913	2000000	53	0.02	0.123658	0.489432	0.125048	0	0.0227368	3e-08	1.7e-05	0.000109	3e-07	8769.55	218.53	0	1	1	0.001	0.0225	0.876955
150600	2005	152605	鄂尔多斯市	0.02	0.16	0.463255	0.028437	0.01059	0.03	22998	65073	2200000	76	0.02	0.107625	0.701437	0.152828	0	0.0300903	8.2e-05	0.023739	0.012967	5e-07	11025	232.81	0	1	1	0.0013	0.031	1.1025
150600	2006	152606	鄂尔多斯市	0	0.16	0.485499	0.053788	0.01083	0.03	29605	77130	2400000	104	0.03	0.099055	0.681924	0.155154	0.02	0.033382	0	0.000379	0.000327	5.7e-05	13001.1	233.28	0	1	1	0.0019	0.038	1.30011
150600	2007	152607	鄂尔多斯市	0	0.17	0.437527	0.069789	0.01106	0.03	39645	91971	2600000	163	0.04	0.102702	0.651641	0.172194	0	0.0440503	7.4e-05	0.001802	0.001699	4e-05	16225.6	235.31	0	1	1	0.0029	0.0437	1.62256
150600	2008	152608	鄂尔多斯市	0.01	0.17	0.399373	0.084233	0.0113	0.03	18301	85022	2800000	250	0.07	0.104601	0.704913	0.247118	0	0.0617097	0.004001	0.004725	0.008727	1e-05	19436.4	233.72	0	1	1	0.003	0.0498	1.94364
150600	2009	152609	鄂尔多斯市	0.04	0.17	0.557936	0.1	0.02113	0.03	37059	146129	3000000	253	0.13	0.107189	0.699554	0.266973	0.01	0.073938	0.000449	0.036942	0.029382	0.000293	21883.6	235.07	0	1	1	0.0054	0.03687	2.18836
150600	2010	152610	鄂尔多斯市	0.06	0.18	0.590981	0.108	0.02591	0.03	45941	196249	3300000	296	0.22	0.120607	0.74995	0.287491	0.04	0.0888963	0	0.05886	0.05086	0.000112	25205.2	234.95	0	1	1	0.0062	0.044257	2.52052
150600	2011	152611	鄂尔多斯市	0.06	0.18	0.609376	0.127	0.03859	0.03	52685	219120	3500000	300	0.39	0.138766	0.775097	0.283892	0.06	0.0991635	7.4e-05	0.05628	0.05617	5.5e-06	29283.4	233.76	0	1	1	0.0076	0.050311	2.92834
150600	2012	152612	鄂尔多斯市	0.04	0.18	0.606571	0.153	0.03848	0.03	58565	237400	3800000	301	0.66	0.132152	0.77705	0.300452	0.06	0.105713	0.000258	0.041378	0.033495	7.5e-05	33140	233.53	0	1	1	0.0126	0.058948	3.314
150600	2013	152613	鄂尔多斯市	0.01	0.18	0.598741	0.16	0.04271	0.03	66609	272300	4200000	306	1.1	0.13112	0.848306	0.341947	0.04	0.121994	0.001964	0.010198	0.01086	0.007474	32242.6	234.16	0	1	1	0.0142	0.064757	3.22426
150600	2014	152614	鄂尔多斯市	0.04	0.18	0.63832	0.1685	0.05725	0.03	46597	219000	4500000	250	1.8	0.133585	0.793865	0.322253	0.01	0.111652	0.005633	0.034627	0.035179	0.000162	34983	235.98	0	1	1	0.0208	0.071146	3.4983
150600	2015	152615	鄂尔多斯市	0.03	0.18	0.63893	0.173	0.05894	0.03	49618	182000	4900000	138	2.9	0.136861	0.77093	0.334243	0.04	0.117084	8.5e-05	0.025156	0.02509	3e-05	37432	237.53	0	1	1	0.0272	0.08651	3.7432
150600	2016	152616	鄂尔多斯市	0.02	0.18	0.658634	0.195	0.07982	0.03	52732	182000	5300000	209	4.6	0.127127	0.803055	0.324964	0.03	0.113878	0.000251	0.021996	0.021808	1e-05	40221	238.41	0	1	1	0.044	0.10371	4.0221
150600	2017	152617	鄂尔多斯市	0.01	0.18	0.752657	0.205	0.09156	0.03	55935	189000	5800000	251	7.1	0.115723	0.753829	0.3196	0.02	0.111779	0.000745	0.012195	0.01287	7e-05	43559	239.425	0	1	1	0.066	0.122511	4.3559
150600	2018	152618	鄂尔多斯市	0.05	0.19	0.857431	0.211295	0.11182	0.03	59224	199000	6600000	252	11	0.155845	0.739087	0.317705	0.01	0.109341	0.002755	0.042586	0.044872	0.000179	46834	240.44	0	1	1	0.0801	0.141225	4.6834
150600	2019	152619	鄂尔多斯市	0.04	0.19	0.901823	0.120175	0.13024	0.04	62594	213000	7600000	276	16	0.173835	0.799481	0.30986	0.05	0.111743	0.004783	0.039716	0.036035	0.008464	49768	234.1	0	1	1	0.1148	0.227313	4.9768
150600	2020	152620	鄂尔多斯市	0.01	0.19	0.961719	0.098832	0.1458	0.03	66043	225126	8100000	271	24	0.187799	0.700453	0.310063	0.04	0.112058	0.001635	0.00628	0.007504	0.000411	50306	234.54	0	1	1	0.1476	0.158084	5.0306
150600	2021	152621	鄂尔多斯市	0	0.19	0.740288	0.083992	0.16935	0.04	69566	237251	8600000	266	36	0.154718	0.756547	0.32542	0.01	0.129972	0.000356	8.3e-05	7.5e-05	1.4e-05	53676	227.39	0	1	1	0.1674	0.218531	5.3676
150600	2022	152622	鄂尔多斯市	0	0.19	0.621931	0.073357	0.19859	0.03	73158	252000	9100000	275	52	0.177022	0.848253	0.33936	0	0.149007	0.000355	0.000341	0.000342	8e-06	55984	223.18	0	1	1	0.193	0.112354	5.5984
150600	2023	152623	鄂尔多斯市	0	0.2	0.695635	0.065542	0.20986	0.03	76815	281400	9600000	283	74	0.191368	0.812852	0.36052	0	0.167843	0.001361	0.001402	0.002417	0.000346	58615	224.75	0	1	1	0.2368		5.8615
150700	2003	152703	呼伦贝尔市	0	0.1	0.825956	0.00141	0.08096	0	6531	86940	432174	50	0	0.190326	0.293801	0.171582		0.0311125	1.2e-06	0	7.7e-06	7e-07	6246.09	218.771	0	1	1	0.0011	0.01558	0.624609
150700	2004	152704	呼伦贝尔市	0	0.11	0.65549	0.001835	0.0974	0	6887	93551	448510	63	0	0.183801	0.301079	0.170738	0	0.0318273	0	0.000109	2e-06	9.5e-05	7147.17	216.26	0	1	1	0.0015	0.0245	0.714717
150700	2005	152705	呼伦贝尔市	0	0.11	0.486079	0.003945	0.10338	0	8663	100151	466662	71	0.01	0.174906	0.307211	0.181813	0	0.0331054	0	0.000199	0.000199	7.5e-05	8228	213.98	0	1	1	0.0014	0.0313	0.8228
150700	2006	152706	呼伦贝尔市	0.01	0.11	0.476004	0.003661	0.11151	0	9716	96400	486884	112	0.01	0.181281	0.315746	0.183322	0	0.0339688	0.007106	0.000802	0.007868	0.000145	9051.46	217.52	0	1	1	0.0015	0.0361	0.905146
150700	2007	152707	呼伦贝尔市	0.02	0.11	0.381337	0.004924	0.12936	0	11021	105695	509476	144	0.02	0.190602	0.301242	0.187956	0.01	0.0374874	0.007612	0.007093	0.008834	0.00015	10363.9	217.03	0	1	1	0.0019	0.0419	1.03639
150700	2008	152708	呼伦贝尔市	0.01	0.11	0.357333	0.005757	0.13617	0	11988	118800	534794	179	0.02	0.214999	0.307612	0.186022	0.02	0.0392892	0.003647	0.001394	0.004194	2e-05	12099.5	217.05	0	1	1	0.002	0.0547	1.20995
150700	2009	152709	呼伦贝尔市	0	0.11	0.438075	0.0083	0.14062	0	10098	136507	563258	216	0.02	0.231728	0.272984	0.192422	0.01	0.0424526	0.003563	0.000492	0.003694	0.0003	13297.8	220.27	0	1	1	0.0036	0.07102	1.32978
150700	2010	152710	呼伦贝尔市	0.03	0.11	0.461947	0.00845	0.12043	0	11352	150681	595370	246	0.02	0.223087	0.269263	0.195186	0	0.0449614	0.002338	0.024714	0.017583	3e-05	14858	217.74	0	1	1	0.0025	0.073739	1.4858
150700	2011	152711	呼伦贝尔市	0.04	0.11	0.424549	0.009729	0.17122	0	13699	162888	631735	306	0.02	0.222582	0.254607	0.201685	0.03	0.0506674	5e-05	0.03837	0.038387	5.1e-06	17142.3	217.02	0	1	1	0.0035	0.084213	1.71423
150700	2012	152712	呼伦贝尔市	0.01	0.11	0.412368	0.010752	0.13368	0	15928	17032	673077	313	0.02	0.22042	0.269536	0.213864	0.04	0.0585503	0	0.009624	0.003346	0.006259	19492	216.05	0	1	1	0.0041	0.094631	1.9492
150700	2013	152713	呼伦贝尔市	0.01	0.1	0.432415	0.023144	0.15138	0	17097	83142	720280	318	0.02	0.219507	0.277503	0.218227	0.01	0.0603373	0	0.00746	0.00736	0.000968	22616	214.53	0	1	1	0.0047	0.107619	2.2616
150700	2014	152714	呼伦贝尔市	0.01	0.11	0.481682	0.005981	0.15819	0	18060	205083	774419	329	0.02	0.228951	0.27555	0.224446	0.01	0.062769	0.000131	0.009301	0.009395	0.001768	24787	219	0	1	1	0.0052	0.122784	2.4787
150700	2015	152715	呼伦贝尔市	0.02	0.1	0.575854	0.003568	0.21539	0	19532	236178	836816	359	0.02	0.234241	0.275892	0.230198	0.01	0.0617373	0	0.014809	0.014809	0.008008	26844	221.57	0	1	1	0.0086	0.136153	2.6844
150700	2016	152716	呼伦贝尔市	0.02	0.1	0.663224	0.004612	0.19144	0	21123	231600	909105	287	0.02	0.254637	0.256891	0.233347	0.02	0.0629485	1e-05	0.01653	0.016529	7e-06	28885	223.67	0	1	1	0.0132	0.148632	2.8885
150700	2017	152717	呼伦贝尔市	0.02	0.1	0.825785	0.004822	0.07479	0	22842	228654	993321	314	0.02	0.302777	0.195957	0.248671	0.02	0.0640069	0	0.018157	0.018064	9.2e-05	31195	225.23	0	1	1	0.0163	0.164954	3.1195
150700	2018	152718	呼伦贝尔市	0.03	0.1	0.922711	0.013416	0.07615	0	24698	232963	1100000	325	0.02	0.358642	0.191481	0.243718	0.02	0.0606888	5.8e-05	0.030969	0.030986	4e-05	33401	226.79	0	1	1	0.0187	0.179294	3.3401
150700	2019	152719	呼伦贝尔市	0.05	0.1	0.964734	0.002918	0.07369	0	26702	218200	1200000	308	0.02	0.385416	0.182601	0.240434	0.03	0.0570021	0.000175	0.051275	0.051338	0.000113	35482	224.34	0	1	1	0.0308	0.215278	3.5482
150700	2020	152720	呼伦贝尔市	0.03	0.1	0.949042	0.004485	0.08369	0	28867	202162	1200000	293	0.02	0.398993	0.170651	0.237223	0.05	0.0556088	5e-07	0.031251	0.031034	0.000218	36168	221.44	0	1	1	0.0462	0.078116	3.6168
150700	2021	152721	呼伦贝尔市	0	0.1	0.856664	0.003742	0.08314	0	31205	186123	1300000	278	0.02	0.313613	0.234964	0.237947	0.03	0.059169	2e-06	1.2e-05	2.5e-05	0.001229	38447	217.53	0	1	1	0.0637	0.138399	3.8447
150700	2022	152722	呼伦贝尔市	0	0.1	0.780399	0.004039	0.0805	0	33730	192954	1300000	297	0.02	0.307625	0.208999	0.236434	0	0.061718	0.001071	0.000425	0.000669	1e-06	39562	212.91	0	1	1	0.0762	0.126899	3.9562
150700	2023	152723	呼伦贝尔市	0	0.1	0.867564	0.003911	0.07965	0	36456	205918	1400000	303	0.02	0.361104	0.191952	0.247749	0	0.0652657	0	7.8e-05	4.1e-05	3.6e-05	41338	215.31	0	1	1	0.0844		4.1338
150800	2003	152803	巴彦淖尔市	0.01	0.27	0.633961	0.004045	0.0365	0	2258	52450	1400000	32	0	0.162327	0.296504	0.114492		0.0162206	0.000376	0.006271	4.3e-05	1.7e-05	6112.28	199.1	0	1	1	0.001	0.003	0.611228
150800	2004	152804	巴彦淖尔市	0	0.28	0.562915	0.002374	0.0325	0	2503	99022	1400000	41	0	0.152016	0.343005	0.11164	0.01	0.016673	0	2e-06	0.00017	5e-07	6909.88	199.95	0	1	1	0.0013	0.0078	0.690988
150800	2005	152805	巴彦淖尔市	0	0.27	0.604883	0.002507	0.0441	0	2833	102893	1400000	38	0	0.157848	0.357608	0.112812	0	0.0174032	0	8.4e-05	0.001891	0.000304	8002.23	200.36	0	1	1	0.0008	0.0094	0.800223
150800	2006	152806	巴彦淖尔市	0	0.28	0.628305	0.003456	0.04012	0	3287	133934	1400000	65	0.01	0.162012	0.303561	0.11513	0	0.0196193	0	8e-05	8e-05	8.1e-05	9010.46	202.06	0	1	1	0.0018	0.0111	0.901046
150800	2007	152807	巴彦淖尔市	0	0.28	0.530259	0.004174	0.05649	0	3518	184962	1400000	80	0.01	0.168199	0.31461	0.123386	0	0.0242841	0	0.000817	0.000565	6.6e-05	10359.7	201.43	0	1	1	0.0012	0.0136	1.03597
150800	2008	152808	巴彦淖尔市	0	0.29	0.504679	0.004676	0.06511	0	3233	219524	1400000	130	0.02	0.183259	0.296764	0.135905	0	0.0276841	0	0.001032	0.000814	2.3e-05	11977	204.5	0	1	1	0.0012	0.01117	1.1977
150800	2009	152809	巴彦淖尔市	0	0.27	0.551008	0.004806	0.07176	0	2860	292957	1400000	171	0.02	0.206873	0.284405	0.138149	0	0.0295491	0.000341	0.001929	0.00217	2e-06	13067.3	205.15	0	1	1	0.0034	0.01047	1.30673
150800	2010	152810	巴彦淖尔市	0.05	0.29	0.574081	0.00463	0.07433	0	3388	376400	1400000	109	0.03	0.204744	0.309878	0.142116	0	0.0322225	7e-06	0.047836	0.039834	6e-05	14421.5	203.24	0	1	1	0.0058	0.011006	1.44215
150800	2011	152811	巴彦淖尔市	0.04	0.29	0.568439	0.0051	0.07181	0	3431	389500	1400000	103	0.04	0.215264	0.276208	0.154439	0.05	0.038856	2.3e-05	0.044001	0.044024	0.002066	16368	202.85	0	1	1	0.0037	0.012542	1.6368
150800	2012	152812	巴彦淖尔市	0	0.29	0.594839	0.026	0.07572	0	3515	50547	1400000	242	0.06	0.224766	0.271387	0.168426	0.04	0.0432466	0.000218	5.2e-05	0.000171	0.0003	18455	202.95	0	1	1	0.004	0.013778	1.8455
150800	2013	152813	巴彦淖尔市	0	0.28	0.681671	0.008275	0.08041	0	3367	93135	1400000	201	0.08	0.230321	0.301278	0.163257	0	0.0410063	0.000167	0.0036	0.003765	0.00039	20674.5	203.88	0	1	1	0.0061	0.015274	2.06745
150800	2014	152814	巴彦淖尔市	0.01	0.27	0.735147	0.010044	0.08581	0	8720	142598	1400000	251	0.12	0.223412	0.320002	0.186426	0	0.0475576	1.4e-05	0.009639	0.009653	0.005914	22618	205.03	0	1	1	0.0041	0.017097	2.2618
150800	2015	152815	巴彦淖尔市	0.01	0.26	0.776438	0.015289	0.09843	0	7873	126000	1400000	202	0.16	0.2586	0.286564	0.189055	0.01	0.0475241	0.000152	0.005165	0.005315	0.001817	24314	210.89	0	1	1	0.008	0.019098	2.4314
150800	2016	152816	巴彦淖尔市	0.01	0.27	0.829601	0.015	0.10606	0	8629	138000	1400000	209	0.22	0.257683	0.29657	0.197546	0.01	0.0502087	3e-05	0.006304	0.006324	9e-05	26259	213.82	0	1	1	0.0078	0.02284	2.6259
150800	2017	152817	巴彦淖尔市	0.02	0.27	0.989495	0.013849	0.11442	0	7947	140000	1400000	211	0.31	0.285125	0.232255	0.198608	0.01	0.0495033	0.000833	0.023098	0.023841	9e-05	28308	214.72	0	1	1	0.0162	0.031955	2.8308
150800	2018	152818	巴彦淖尔市	0.03	0.28	1.08901	0.025172	0.0538	0	8557	132000	1600000	224	0.42	0.328	0.208238	0.206097	0.02	0.0493948	0.000272	0.024601	0.024694	4.1e-05	30497	215.62	0	1	1	0.0192	0.034772	3.0497
150800	2019	152819	巴彦淖尔市	0.02	0.28	1.05893	0.026	0.11289	0	8008	120000	1600000	173	0.57	0.349013	0.182353	0.215188	0.03	0.0497658	4.6e-05	0.017547	0.017504	8.8e-05	32634	220.55	0	1	1	0.0252	0.088895	3.2634
150800	2020	152820	巴彦淖尔市	0	0.28	1.01241	0.023503	0.11069	0	8499	123393	1600000	186	0.79	0.350299	0.185881	0.222575	0.02	0.0516601	0.000162	0.00439	0.004552	6e-07	33657	219.04	0	1	1	0.0313	0.06581	3.3657
150800	2021	152821	巴彦淖尔市	0	0.28	0.955036	0.023786	0.11289	0	8057	126786	1600000	200	1.1	0.27368	0.220205	0.222067	0	0.0543239	5e-06	0.001249	0.002591	3.6e-05	36350	215.79	0	1	1	0.037	0.069769	3.635
150800	2022	152822	巴彦淖尔市	0	0.28	0.964432	0.023752	0.12314	0	8452	147900	1700000	211	1.5	0.283295	0.252249	0.222939	0	0.0570275	0.000343	0.000107	0.000425	0.0002	38457.9	211.73	0	1	1	0.0332	0.034897	3.84579
150800	2023	152823	巴彦淖尔市	0	0.28	1.03136	0.023756	0.11311	0	8096	143881	1700000	211	2	0.314153	0.219743	0.231286	0	0.0604326	0.000191	0.000487	0.000446	0.000232	40804	213.02	0	1	1	0.0394		4.0804
150900	2003	152903	乌兰察布市	0	0.5	0.423933	0.000325	0.07976	0	2101	16151	1100000	13	0	0.192257	0.237173	0.079407		0.0105077	0.000766	0.001224	0.002408	0.000524	5628.56	196.16	0	1	1	0.0005	0.0103	0.562856
150900	2004	152904	乌兰察布市	0	0.5	0.456663	0.000346	0.10199	0	2674	19180	1200000	14	0	0.231641	0.210284	0.079507	0	0.0116098	0	0.00017	0.010101	0.002244	6471.17	196.71	0	1	1	0.0004	0.014	0.647117
150900	2005	152905	乌兰察布市	0	0.5	0.48665	0.000436	0.112	0	2758	20100	1300000	16	0	0.192703	0.268731	0.094952	0	0.0123111	0.001783	0.000109	0.001082	0.000348	7519	205.75	0	1	1	0.0006	0.0201	0.7519
150900	2006	152906	乌兰察布市	0	0.51	0.469218	0.000324	0.12346	0	4001	23793	1400000	17	0.01	0.171393	0.263015	0.105811	0	0.0152134	0	0.000109	0.000109	0.00035	8441.15	210.25	0	1	1	0.0001	0.027	0.844115
150900	2007	152907	乌兰察布市	0	0.52	0.439669	0.00156	0.19431	0	4516	30379	1500000	18	0.01	0.198542	0.22297	0.106497	0	0.0164221	0	0.000202	0.000202	0.000702	9773.66	215.28	0	1	1	0.0008	0.029	0.977366
150900	2008	152908	乌兰察布市	0	0.53	0.395644	0.006544	0.1922	0	5176	27700	1600000	49	0.01	0.208235	0.170876	0.110392	0	0.0201078	0	0.000111	0.000111	4e-05	11748.8	212.48	0	1	1	0.001	0.033	1.17488
150900	2009	152909	乌兰察布市	0.02	0.53	0.422283	0.003884	0.192	0	4312	79900	1700000	69	0.01	0.227966	0.122764	0.112203	0	0.0194135	2e-05	0.017366	0.009386	0.005667	12866.3	215.38	0	1	1	0.0006	0.01547	1.28663
150900	2010	152910	乌兰察布市	0.01	0.53	0.4248	0.007932	0.19	0	5311	105000	1900000	94	0.02	0.246702	0.123792	0.11668	0.02	0.0223996	5e-07	0.012641	0.012641	5.5e-05	14288.6	213.62	0	1	1	0.0019	0.017488	1.42886
150900	2011	152911	乌兰察布市	0.02	0.53	0.398571	0.012813	0.15393	0	5800	135000	2000000	125	0.02	0.270076	0.125918	0.120456	0.01	0.0237706	0	0.02058	0.02058	0.00087	16313.5	212.83	0	1	1	0.0022	0.023943	1.63135
150900	2012	152912	乌兰察布市	0.01	0.48	0.440956	0.017141	0.158	0	6508	138677	2200000	102	0.02	0.29919	0.1489	0.134459	0.02	0.0312155	0	0.00632	0.00632	0.000112	18609	212.92	0	1	1	0.0061	0.02754	1.8609
150900	2013	152913	乌兰察布市	0	0.52	0.518192	0.022162	0.20573	0	6966	199000	2500000	190	0.03	0.301383	0.303119	0.138444	0.01	0.0310503	5.5e-06	0.00359	0.003596	0.000103	20894.6	214.52	0	1	1	0.0029	0.032703	2.08946
150900	2014	152914	乌兰察布市	0	0.51	0.56583	0.019625	0.2074	0	6331	23300	2700000	223	0.03	0.340145	0.171686	0.153503	0	0.0354269	8.3e-06	0.003864	0.002153	0.00041	22796	219.05	0	1	1	0.0032	0.03782	2.2796
150900	2015	152915	乌兰察布市	0.01	0.5	0.564659	0.003992	0.2065	0	6655	262300	3100000	232	0.03	0.348445	0.173213	0.159704	0	0.035937	0	0.013811	0.013781	0.00428	24597	221.45	0	1	1	0.0027	0.045366	2.4597
150900	2016	152916	乌兰察布市	0.01	0.51	0.653656	0.079092	0.21054	0	6982	291000	3400000	175	0.04	0.322864	0.186983	0.162157	0.01	0.0380029	4.7e-05	0.008366	0.008406	1e-07	26565	222.71	0	1	1	0.0069	0.055072	2.6565
150900	2017	152917	乌兰察布市	0.02	0.5	0.825436	0.040626	0.21687	0	7312	96206	3900000	170	0.05	0.373503	0.135507	0.163926	0.01	0.0373021	0.000202	0.015268	0.015292	0.000178	28796	224.475	0	1	1	0.0125	0.063968	2.8796
150900	2018	152918	乌兰察布市	0.01	0.51	0.961712	0.00216	0.22799	0	7643	111663	4400000	223	0.05	0.457556	0.13208	0.171024	0.02	0.0378954	0.000173	0.010915	0.011048	0.008004	30999	226.24	0	1	1	0.0204	0.075503	3.0999
150900	2019	152919	乌兰察布市	0.02	0.51	0.970285	0.0022	0.253	0	7976	109000	5200000	193	0.06	0.459415	0.134331	0.177863	0.01	0.0378915	3.3e-05	0.01952	0.019543	1e-05	33041.8	228.18	0	1	1	0.0344	0.1277	3.30418
150900	2020	152920	乌兰察布市	0	0.51	0.978597	0.001757	0.26054	0	8309	115768	5600000	203	0.06	0.468723	0.145307	0.187315	0.02	0.0408612	0.000452	0.003297	0.003662	8.6e-05	33534	225.26	0	1	1	0.0407	0.125866	3.3534
150900	2021	152921	乌兰察布市	0	0.51	0.962721	0.002121	0.27017	0	8642	122536	6000000	213	0.07	0.418095	0.159003	0.188262	0	0.0424469	0.00245	0.000177	3e-05	0.000435	35915	224.2	0	1	1	0.0393	0.090346	3.5915
150900	2022	152922	乌兰察布市	0.01	0.51	0.894008	0.001812	0.32311	0	8975	130000	6400000	200	0.07	0.368877	0.166685	0.190386	0	0.045635	1e-05	0.005548	0.00555	5.3e-05	37352	220.22	0	1	1	0.0465	0.075146	3.7352
150900	2023	152923	乌兰察布市	0	0.51	0.942072	0.002067	0.37167	0	9306	137087	6800000	202	0.08	0.383252	0.163339	0.198627	0.01	0.0489237	0.000431	0.000244	0.000477	0.000197	39518	221.29	0	1	1	0.0611		3.9518
210100	2003	212103	沈阳市	0	5.31	1.35475	0.224237	2.3608	0.14	14636	938029	2000000	275	0.09	0.087156	0.58027	0.213079		0.0618799	5e-06	8.7e-05	0.008414	1e-05	7960.97	240.68	1	1	1	0.1036	0.22543	0.796097
210100	2004	212104	沈阳市	0	5.35	1.24768	0.242277	3.03524	0.14	15037	762043	2000000	305	0.11	0.090339	0.637927	0.211829	0	0.0653961	2.4e-05	2.1e-05	2.9e-05	0.000285	8923.96	237.85	1	1	1	0.109	0.2818	0.892396
210100	2005	212105	沈阳市	0.03	5.38	1.13028	0.212312	4.09232	0.14	15852	921260	2100000	348	0.13	0.104144	0.636452	0.222702	0	0.0683484	0.002393	0.02682	0.007227	1.3e-05	10098.1	243.39	1	1	1	0.1312	0.35	1.00981
210100	2006	212106	沈阳市	0.01	5.42	1.0376	0.303444	3.10645	0.14	17552	893096	2200000	412	0.15	0.106668	0.653484	0.228349	0.03	0.0729772	0.000451	0.011035	0.031999	4.5e-06	11651.4	243.05	1	1	1	0.165	0.4513	1.16514
210100	2007	212107	沈阳市	0.01	5.47	0.89837	0.504451	3.1745	0.14	19092	864932	2300000	434	0.18	0.105452	0.679497	0.230676	0.01	0.0809058	4e-05	0.008686	0.008379	4e-05	14606.5	240.38	1	1	1	0.1979	0.5011	1.46065
210100	2008	212108	沈阳市	0.01	5.5	0.913401	0.600138	3.27059	0.14	20732	908700	2400000	513	0.22	0.105359	0.715543	0.237757	0.01	0.0876122	2e-05	0.008416	0.008437	1.3e-05	17013.1	239.38	1	1	1	0.2553	0.5161	1.70131
210100	2009	212109	沈阳市	0.05	5.52	1.19125	0.541039	3.41863	0.14	15164	944570	2500000	747	0.2	0.111487	0.67287	0.245382	0.01	0.0923757	0.00187	0.045081	0.043695	0.000937	18474.6	239.46	1	1	1	0.2839	0.53925	1.84746
210100	2010	212110	沈阳市	0.07	5.54	1.18986	0.505369	3.48583	0.14	17348	990880	2600000	855	0.21	0.102964	0.900759	0.253603	0.05	0.102183	0.005551	0.061306	0.064533	7e-06	20541.2	239.3	1	1	1	0.3509	0.57053	2.05412
210100	2011	212111	沈阳市	0.08	5.57	1.16452	0.550247	3.74171	0.14	19405	1100000	2700000	882	0.2	0.108066	0.97002	0.268455	0.07	0.113336	0.005334	0.07092	0.074986	5.3e-05	23326.2	238.42	1	1	1	0.4205	0.62473	2.33262
210100	2012	212112	沈阳市	0.06	5.58	1.18934	0.580435	3.69285	0.14	21719	1200000	2800000	996	0.21	0.116028	0.933366	0.284184	0.08	0.127437	0.015901	0.04424	0.051871	2e-05	26430.8	238.22	1	1	1	0.5204	0.687203	2.64308
210100	2013	212113	沈阳市	0.09	5.6	1.23866	0.581093	3.83543	0.14	21491	1100000	2900000	1016	0.21	0.123109	0.908903	0.298914	0.06	0.138659	0.013685	0.077664	0.085208	0.000405	29073.9	238.35	1	1	1	0.5864	0.75741	2.90739
210100	2014	212114	沈阳市	0.07	5.68	1.4125	0.227403	3.99694	0.14	23488	1100000	3000000	1044	0.21	0.128808	0.859062	0.306349	0.09	0.137312	0.008392	0.063243	0.069867	0.000117	34232.9	239.93	1	1	1	0.6565	0.80877	3.42329
210100	2015	212115	沈阳市	0.05	5.68	1.55987	0.106116	4.04032	0.14	23262	1000000	3100000	1349	0.21	0.111186	0.749765	0.325122	0.07	0.13689	0.017171	0.034125	0.049478	0.00061	36642.9	241.82	1	1	1	0.7623	0.91542	3.66429
210100	2016	212116	沈阳市	0.07	5.68	2.26624	0.081606	4.03589	0.14	23184	1100000	3300000	1226	0.21	0.148815	0.752307	0.336233	0.05	0.132682	0.027394	0.03888	0.057126	1.2e-05	38995.3	250.61	1	1	1	0.8677	0.633302	3.89953
210100	2017	212117	沈阳市	0.06	5.69	2.2391	0.101263	3.97776	0.14	23157	1100000	3400000	1244	0.21	0.147806	0.767519	0.343624	0.07	0.135321	0.003109	0.057125	0.05844	0.001794	41358.8	251.79	1	1	1	0.8704	0.0726224	4.13588
210100	2018	212118	沈阳市	0.05	5.69	2.34042	0.143097	3.91152	0.17	23148	990255	3600000	1318	0.21	0.15343	0.746438	0.345536	0.06	0.1417	0.004146	0.040564	0.040512	0.000221	44054.2	252.97	1	1	1	1.0544	0.81756	4.40542
210100	2019	212119	沈阳市	0.04	5.7	2.56866	0.165054	4.24191	0.17	23145	993768	3700000	1273	0.21	0.161924	0.697073	0.356133	0.05	0.145435	0.00545	0.036826	0.03903	0.003246	46785.6	256.55	1	1	1	1.1367	0.94244	4.67856
210100	2020	212120	沈阳市	0.07	5.7	2.72821	0.173327	4.40146	0.17	23143	1100000	3800000	1220	0.21	0.163428	0.685331	0.359332	0.04	0.14381	0.010656	0.056854	0.056218	0.011	47413.1	256.9	1	1	1	1.305	0.54071	4.74131
210100	2021	212121	沈阳市	0.02	5.71	2.62732	0.176219	4.5149	0.17	23143	1100000	4000000	1167	0.21	0.142407	0.748826	0.363793	0.07	0.149106	0.007126	0.014574	0.004938	0.00034	50566	254.55	1	1	1	1.2295		5.0566
210100	2022	212122	沈阳市	0.01	5.71	2.67684	0.177209	4.72174	0.17	23143	1200000	4100000	1203	0.21	0.136901	0.677374	0.36417	0.02	0.150673	0.001977	0.005838	0.002863	1e-06	51702	252.79	1	1	1	1.2027	0.718	5.1702
210100	2023	212123	沈阳市	0.06	5.71	2.49033	0.177545	4.46778	0.17	23143	1300000	4300000	1235	0.21	0.133471	0.738757	0.372101	0.01	0.158956	0.006415	0.057449	0.052448	0.011	53650	254.4	1	1	1	1.2076		5.365
210200	2003	212203	大连市	0	4.45	1.28681	0.221126	1.49999	0.16	21081	436724	1600000	197	0.09	0.090277	0.750008	0.1897		0.0587156	0	3.6e-06	0.002436	0.000376	9101.35	233.15	0	1	1	0.0605	0.11524	0.910135
210200	2004	212204	大连市	0	4.47	1.17229	0.220328	1.74673	0.16	22537	726508	1700000	237	0.1	0.086814	0.687997	0.19844	0	0.0640697	3e-05	0	5e-07	0.002521	10377.8	233.25	0	1	1	0.0776	0.16	1.03778
210200	2005	212205	大连市	0.01	4.5	1.18722	0.300415	1.82152	0.16	24667	938321	1700000	300	0.12	0.096505	0.729052	0.209891	0	0.067078	0.001216	0.006149	0.011453	3e-05	11994.4	235.68	0	1	1	0.0889	0.19	1.19944
210200	2006	212206	大连市	0.03	4.55	1.15755	0.224477	2.01378	0.16	27526	612859	1800000	332	0.16	0.10372	0.7359	0.215016	0.01	0.0715254	0.000267	0.032011	6e-06	5e-07	13350.1	234.93	0	1	1	0.1059	0.215	1.33501
210200	2007	212207	大连市	0	4.6	1.03625	0.316276	2.19982	0.16	30373	693863	1900000	413	0.21	0.110063	0.777704	0.219449	0.03	0.0798746	3e-05	0.00474	0.00462	0.000346	15108.6	234.03	0	1	1	0.1299	0.248	1.51086
210200	2008	212208	大连市	0	4.64	0.961788	0.500678	2.30524	0.16	33956	783941	1900000	510	0.28	0.106266	0.826995	0.22644	0	0.0878699	2.8e-06	0.0041	0.004058	2e-06	17500.5	232.34	0	1	1	0.1746	0.3	1.75005
210200	2009	212209	大连市	0.06	4.65	1.12525	0.601697	2.36784	0.16	27611	811925	2000000	630	0.36	0.108326	0.849456	0.241606	0	0.0953818	0.024451	0.030128	0.048125	3.3e-05	19014.4	235.7	0	1	1	0.2282	0.3412	1.90144
210200	2010	212210	大连市	0.09	4.66	1.19403	1	2.45756	0.16	31073	843767	2100000	675	0.47	0.118545	0.819057	0.246652	0.06	0.10473	0.021343	0.067096	0.085758	5e-06	21292.6	234.74	0	1	1	0.3213	0.3777	2.12926
210200	2011	212211	大连市	0.1	4.68	1.16506	1.1	2.55171	0.16	34943	907914	2200000	777	0.6	0.11949	0.885958	0.259134	0.09	0.117296	0.032276	0.072656	0.10421	1e-05	24276.2	234.04	0	1	1	0.4331	0.4261	2.42762
210200	2012	212212	大连市	0.09	4.69	1.16059	1.2	2.63692	0.16	38913	959980	2400000	840	0.77	0.127228	0.841911	0.277176	0.1	0.13153	0.032013	0.061352	0.089038	1e-06	27539.2	234.2	0	1	1	0.4973	0.4687	2.75392
210200	2013	212213	大连市	0.18	4.7	1.19054	1.4	2.76275	0.16	40557	987046	2500000	909	0.97	0.141624	0.784621	0.295968	0.09	0.142229	0.136902	0.038335	0.167763	6e-05	30238	235.65	0	1	1	0.6133	0.5231	3.0238
210200	2014	212214	大连市	0.39	4.73	1.29662	1.4	2.86224	0.16	43676	894465	2700000	849	1.2	0.129246	0.789186	0.301557	0.18	0.142581	0.359348	0.026066	0.379501	0.000991	33591.3	239.16	0	1	1	0.4304	0.562	3.35913
210200	2015	212215	大连市	0.45	4.72	1.38341	0.270302	2.90025	0.16	45357	817487	2900000	726	1.5	0.117788	0.636783	0.312781	0.39	0.132856	0.399175	0.055394	0.450288	1e-06	35889	243.97	0	1	1	0.4719	0.68281	3.5889
210200	2016	212216	大连市	0.52	4.73	1.61593	0.3002	2.90217	0.16	47102	895271	3100000	833	1.9	0.12779	0.703113	0.314442	0.45	0.132474	0.481418	0.036139	0.511693	9e-05	38049.5	243.58	0	1	1	0.596	0.76338	3.80495
210200	2017	212217	大连市	0.24	4.73	1.60414	0.32487	2.84856	0.16	48914	866327	3400000	888	2.3	0.131596	0.714947	0.31617	0.52	0.134861	0.223353	0.021637	0.23966	0.00533	40587.4	244.385	0	1	1	0.6391	0.841	4.05874
210200	2018	212218	大连市	0.49	4.74	1.47956	0.267846	2.79945	0.17	50795	843574	3700000	894	2.8	0.130598	0.702938	0.334793	0.24	0.147438	0.43725	0.049557	0.47545	0.000281	43550.3	245.19	0	1	1	0.8821	0.928807	4.35503
210200	2019	212219	大连市	0.45	4.74	1.71343	0.064617	2.90589	0.2	52747	815600	4000000	889	3.5	0.145142	0.681738	0.315914	0.49	0.131983	0.423109	0.026568	0.436369	0.013	46468.2	245.91	0	1	1	0.8843	1.02682	4.64682
210200	2020	212220	大连市	0.27	4.74	1.79637	0.048574	3.25738	0.21	54774	843998	4200000	910	4.2	0.14253	0.701291	0.325902	0.45	0.13071	0.237656	0.03525	0.255665	0.017	47379.5	245.9	0	1	1	0.9654	0.39852	4.73795
210200	2021	212221	大连市	0.01	4.75	1.6975	0.037983	3.33825	0.21	56878	872395	4400000	932	5	0.125231	0.752609	0.332133	0.27	0.142513	0.002951	0.00398	0.00075	2e-05	50531.4	243.69	0	1	1	0.9921		5.05314
210200	2022	212222	大连市	0.01	4.75	1.65911	0.030728	3.34572	0.21	59062	902225	4500000	956	6	0.117552	0.675791	0.335023	0.01	0.143994	0.010932	0.00222	0.001083	2.8e-05	51904	241.61	0	1	1	0.9959		5.1904
210200	2023	212223	大连市	0.01	4.75	1.62146	0.025598	3.28491	0.21	61330	918857	4700000	984	7.2	0.115789	0.740239	0.343416	0.01	0.14799	0.003695	0.009946	0.009287	0.004354	53689	242.96	0	1	1	0.8793		5.3689
210300	2003	212303	鞍山市	0	3.73	0.560462	0.022651	0.18846	0.02	7358	210451	1500000	82	0.04	0.060991	0.60625	0.16941		0.0357649	2e-05	0	1e-06	0.001796	7434.33	232.56	0	1	1	0.0184	0.05295	0.743433
210300	2004	212304	鞍山市	0	3.75	0.489332	0.020244	0.22894	0.02	7865	246224	1500000	97	0.04	0.063615	0.628298	0.168413	0	0.0400139	8.5e-05	1e-05	0.000302	1e-07	8262.32	229.76	0	1	1	0.0168	0.069	0.826232
210300	2005	212305	鞍山市	0.01	3.76	0.452942	0.006936	0.26868	0.02	7651	181218	1500000	113	0.04	0.081674	0.664492	0.175648	0	0.0412135	3.3e-05	0.011421	3.3e-05	0.001234	9462.93	232.98	0	1	1	0.0187	0.077	0.946293
210300	2006	212306	鞍山市	0	3.77	0.460183	0.013534	0.2919	0.02	7932	206233	1500000	160	0.04	0.07991	0.618697	0.178296	0.01	0.0426018	5e-07	3.9e-05	0.008535	2.8e-06	10760.9	233.46	0	1	1	0.0316	0.0965	1.07609
210300	2007	212307	鞍山市	0	3.79	0.453886	0.025817	0.31691	0.02	8734	229613	1500000	198	0.06	0.08998	0.616264	0.182076	0	0.0458229	1.4e-06	0	1.4e-06	0.002183	12856.6	234.08	0	1	1	0.0326	0.1222	1.28566
210300	2008	212308	鞍山市	0	3.8	0.435037	0.058161	0.33574	0.02	9035	240000	1600000	222	0.08	0.097326	0.639157	0.187352	0	0.0489536	0	2.3e-05	2.3e-05	3e-07	15074.4	235.25	0	1	1	0.0452	0.153	1.50744
210300	2009	212309	鞍山市	0.02	3.8	0.541897	0.074177	0.35869	0.02	13627	255562	1600000	256	0.07	0.102785	0.692221	0.192792	0	0.0512241	2e-05	0.023079	0.023094	5e-07	16530.2	236.67	0	1	1	0.0423	0.19156	1.65302
210300	2010	212310	鞍山市	0.03	3.8	0.507829	0.090495	0.36219	0.02	17805	270470	1700000	279	0.08	0.095012	0.891691	0.204635	0.02	0.0548344	0.000427	0.025275	0.02559	0.011	18423.1	235.92	0	1	1	0.0471	0.2224	1.84231
210300	2011	212311	鞍山市	0.03	3.8	0.47643	0.110256	0.37467	0.02	21016	293150	1700000	318	0.07	0.096745	0.892053	0.202181	0.03	0.059976	6.5e-06	0.025007	0.025014	0.003679	21297.1	236.38	0	1	1	0.0663	0.25865	2.12971
210300	2012	212312	鞍山市	0.02	3.79	0.538561	0.12752	0.37593	0.02	24391	298866	1800000	343	0.08	0.119484	0.807519	0.211825	0.03	0.0660261	3.1e-05	0.019148	0.019177	0.00025	24194.1	235.53	0	1	1	0.0607	0.292274	2.41941
210300	2013	212313	鞍山市	0.03	3.78	0.542613	0.138391	0.37541	0.02	19990	306894	1900000	361	0.07	0.12404	0.735272	0.216288	0.02	0.0671603	0.001001	0.023742	0.023775	8.4e-05	26661.9	235.88	0	1	1	0.0609	0.328177	2.66619
210300	2014	212314	鞍山市	0.01	3.76	0.693543	0.15901	0.36235	0.02	21707	285000	2000000	354	0.08	0.136388	0.742764	0.234444	0.03	0.0682307	5.7e-05	0.013829	0.013476	0.001127	27845.9	237.44	0	1	1	0.0627	0.39495	2.78459
210300	2015	212315	鞍山市	0.04	3.74	0.834208	0.009575	0.35372	0.02	22497	261281	2200000	334	0.07	0.104611	0.527961	0.24198	0.01	0.0670985	8.5e-05	0.039205	0.039288	9.6e-05	29942.7	240.13	0	1	1	0.0819	0.3414	2.99427
210300	2016	212316	鞍山市	0.02	3.75	1.46133	0.002634	0.34113	0.01	21962	289224	2400000	328	0.08	0.170949	0.532005	0.251311	0.04	0.0622748	0.000107	0.017152	0.017142	0.001155	31442.9	249.48	0	1	1	0.081	0.396771	3.14429
210300	2017	212317	鞍山市	0.01	3.75	1.40717	0.004052	0.33863	0.02	22321	290010	2700000	353	0.07	0.169761	0.512037	0.249091	0.02	0.0631849	5.2e-05	0.010679	0.010508	0.000223	33320	248.07	0	1	1	0.09	0.45232	3.332
210300	2018	212318	鞍山市	0.01	3.76	1.42135	0.003959	0.30867	0.01	22078	281366	3000000	366	0.08	0.158416	0.545931	0.24758	0.01	0.0650702	0.000866	0.006385	0.005784	0.000275	35619.1	246.66	0	1	1	0.0952	0.51112	3.56191
210300	2019	212319	鞍山市	0.02	3.77	1.4487	0.001706	0.31244	0	22242	271191	3000000	370	0.07	0.187383	0.468746	0.245488	0.01	0.065862	0.000234	0.018441	0.017803	0.000872	37756.2	244.3	0	1	1	0.1268	0.58848	3.77562
210300	2020	212320	鞍山市	0.01	3.77	1.45898	0.001305	0.35501	0	22131	283937	3100000	376	0.07	0.200135	0.45188	0.248248	0.02	0.0641183	0.000515	0.005118	0.005104	0.000529	37979.9	245.64	0	1	1	0.1569	0.384247	3.79799
210300	2021	212321	鞍山市	0	3.77	1.23929	0.001328	0.39081	0	22206	296683	3100000	381	0.07	0.154201	0.583993	0.25108	0.01	0.0663486	0.00015	0.0006	5.1e-05	2.5e-06	41018.3	244.34	0	1	1	0.1403		4.10183
210300	2022	212322	鞍山市	0	3.78	1.34864	0.001326	0.41437	0	22156	305492	3200000	394	0.07	0.16505	0.483026	0.261293	0	0.0666348	2.5e-05	0.00055	0.000575	0.003013	41767	245.9	0	1	1	0.1123		4.1767
210300	2023	212323	鞍山市	0	3.78	1.32306	0.001327	0.64193	0	22189	304892	3200000	401	0.07	0.154304	0.51658	0.271679	0	0.0702352	0.000402	0.000811	0.000794	0.000419		246.45	0	1	1	0.1096
210400	2003	212403	抚顺市	0	2	0.707773	0.006776	0.17977	0	4093	85522	1100000	57	0.02	0.101364	0.466365	0.170328		0.0338279	0	5.4e-07	3e-06	0.00088	6393.3	224.9	0	1	1	0.0034	0.01623	0.63933
210400	2004	212404	抚顺市	0	2	0.615314	0.003478	0.19859	0	4373	145089	1100000	63	0.02	0.10514	0.446665	0.168545	0	0.0356703	0	5e-07	1e-05	4.6e-06	7008	224.24	0	1	1	0.0042	0.0248	0.7008
210400	2005	212405	抚顺市	0	1.99	0.528105	0.004207	0.25861	0	4449	96707	1100000	69	0.03	0.13027	0.438316	0.179283	0	0.0366935	3.3e-05	7.5e-05	0.008454	0.000261	8005.17	229.96	0	1	1	0.0067	0.041	0.800517
210400	2006	212406	抚顺市	0.01	1.99	0.483048	0.005279	0.28705	0	5760	115730	1100000	89	0.03	0.132854	0.453133	0.179715	0	0.0384385	7.4e-05	0.008461	5.5e-05	2e-06	9304.98	229.68	0	1	1	0.0065	0.069	0.930498
210400	2007	212407	抚顺市	0	1.98	0.405013	0.00685	0.31871	0	6171	150392	1100000	125	0.04	0.136284	0.492737	0.180382	0.01	0.0397139	3e-07	4e-05	0.003058	6.3e-05	10809.4	229.69	0	1	1	0.0076	0.095	1.08094
210400	2008	212408	抚顺市	0.01	1.98	0.349794	0.013386	0.35474	0	6861	130000	1100000	125	0.05	0.133013	0.512689	0.17875	0	0.0417601	1.3e-07	0.01296	0.012935	2.7e-05	12434.2	228.88	0	1	1	0.0121	0.122	1.24342
210400	2009	212409	抚顺市	0.01	1.97	0.476732	0.031284	0.37508	0	5724	138848	1100000	196	0.04	0.169075	0.455181	0.180285	0.01	0.042591	5e-06	0.014182	0.013882	0.000114	13557	229.56	0	1	1	0.0173	0.16983	1.3557
210400	2010	212410	抚顺市	0.01	1.96	0.416663	0.044182	0.42524	0	7367	144414	1100000	173	0.04	0.167852	0.540757	0.184768	0.01	0.0461844	0	0.006166	0.006136	8.8e-05	15302.9	228.06	0	1	1	0.0123	0.19802	1.53029
210400	2011	212411	抚顺市	0	1.95	0.408183	0.020826	0.43489	0	9461	153822	1100000	185	0.04	0.148495	0.644177	0.188823	0.01	0.0515166	5e-07	0.001018	0.00101	0.000322	18068.8	225.85	0	1	1	0.0196	0.23347	1.80688
210400	2012	212412	抚顺市	0	1.95	0.405425	0.012635	0.44344	0	10269	163891	1100000	192	0.04	0.161927	0.650111	0.205916	0	0.0609587	3e-05	0.000133	8.8e-05	0.002942	20545	225.65	0	1	1	0.0351	0.263821	2.0545
210400	2013	212413	抚顺市	0.03	1.93	0.437729	0.052108	0.44246	0	9719	169667	1100000	210	0.04	0.170777	0.586278	0.208391	0	0.0607251	0.00013	0.028225	0.027965	0.000996	22702.2	225.59	0	1	1	0.0327	0.298756	2.27022
210400	2014	212414	抚顺市	0.01	1.93	0.520343	0.035731	0.44369	0	10452	156608	1100000	204	0.04	0.175079	0.600669	0.221087	0.03	0.0645183	2.1e-06	0.01073	0.010554	2e-05	25035.4	230.1	0	1	1	0.0307	0.37025	2.50354
210400	2015	212415	抚顺市	0.03	1.92	0.607246	0.002606	0.46035	0	10607	141707	1100000	199	0.04	0.137898	0.439743	0.233398	0.01	0.0611074	0.000129	0.031534	0.030921	9e-05	26817.9	234.01	0	1	1	0.0408	0.3212	2.68179
210400	2016	212416	抚顺市	0	1.92	0.877742	1.6e-05	0.44021	0.01	10572	156940	1100000	194	0.04	0.202503	0.441422	0.232181	0.03	0.0587753	1e-06	0.004214	0.004203	0.000302	28467.2	235.14	0	1	1	0.0501	0.303357	2.84672
210400	2017	212417	抚顺市	0.02	1.92	0.945456	0.002831	0.40475	0.01	10580	158024	1000000	203	0.04	0.191939	0.483011	0.227156	0	0.0589355	5e-05	0.01677	0.016685	0.000135	30346	234.42	0	1	1	0.0367	0.34583	3.0346
210400	2018	212418	抚顺市	0.01	1.92	0.924646	0.001033	0.41331	0.01	10578	153106	1100000	207	0.04	0.19986	0.426479	0.228547	0.02	0.0594966	0.000113	0.010462	0.010354	0.001081	32470.2	233.7	0	1	1	0.0567	0.0392	3.24702
210400	2019	212419	抚顺市	0.02	1.92	1.22638	0.00304	0.42442	0.01	10578	143890	1100000	209	0.04	0.245738	0.361345	0.22776	0.01	0.0572615	2.1e-05	0.023718	0.023721	1.8e-05	34580.8	236.36	0	1	1	0.0701	0.456904	3.45808
210400	2020	212420	抚顺市	0	1.92	1.34185	0.003263	0.45702	0.01	10578	151483	1100000	208	0.04	0.247683	0.373935	0.224922	0.02	0.0495904	0.000178	0.002959	0.002782	0.000355	35057.5	237.76	0	1	1	0.0914	0.099735	3.50575
210400	2021	212421	抚顺市	0	1.92	1.2161	0.00339	0.47626	0.01	10578	159076	1100000	208	0.04	0.188656	0.468833	0.222989	0	0.0496576	0.000251	0.00014	5e-07	0.00022	37511.6	237.28	0	1	1	0.088	0.11111	3.75116
210400	2022	212422	抚顺市	0	1.92	1.22408	0.00346	0.44728	0.01	10578	167074	1100000	212	0.04	0.187288	0.350003	0.223309	0	0.0487772	0.000112	5e-06	1.2e-05	2e-05	38489	235.64	0	1	1	0.0744	0.09541	3.8489
210400	2023	212423	抚顺市	0	1.92	1.30094	0.003498	0.32187	0.01	10578	165111	1200000	218	0.04	0.18752	0.376085	0.228837	0	0.0492407	0.000439	0.000841	0.000944	0.000336	40236	239.11	0	1	1	0.0697		4.0236
210500	2003	212503	本溪市	0	1.86	0.886426	0.003559	0.06733	0.01	6140	137061	1100000	33	0.02	0.131958	0.492668	0.187399		0.0347012	0	2e-06	5e-07	2.9e-05	6347.76	229.22	0	1	1	0.0028	0.03415	0.634776
210500	2004	212504	本溪市	0	1.86	0.854223	0.004617	0.08901	0.01	6327	161170	1100000	44	0.02	0.111808	0.515827	0.181263	0	0.0350344	0.000303	0	8.3e-06	1.5e-05	6930.27	227.38	0	1	1	0.0035	0.042	0.693027
210500	2005	212505	本溪市	0.01	1.86	0.718985	0.003856	0.10137	0.01	6896	182855	1100000	52	0.03	0.119874	0.529981	0.192329	0	0.0382664	3.4e-05	0.008724	0.003605	3e-08	8105.36	226.95	0	1	1	0.0045	0.0511	0.810536
210500	2006	212506	本溪市	0	1.86	0.674758	0.005035	0.12077	0.01	7483	205842	1100000	61	0.03	0.127623	0.523818	0.184438	0.01	0.0380054	0	0.000113	1e-06	0.005582	9477.74	225.8	0	1	1	0.0056	0.072	0.947774
210500	2007	212507	本溪市	0	1.85	0.618696	0.00853	0.12448	0.01	7716	251127	1200000	83	0.03	0.130401	0.534037	0.187377	0	0.0409453	0.0001	5e-05	0.003	3.3e-05	11100.5	225.23	0	1	1	0.0047	0.1045	1.11005
210500	2008	212508	本溪市	0	1.85	0.559566	0.011305	0.10041	0.01	8647	100000	1200000	88	0.04	0.124243	0.559152	0.188457	0	0.0435405	5e-07	0.003191	0.003151	0.002376	13310.6	224.29	0	1	1	0.0052	0.139	1.33106
210500	2009	212509	本溪市	0.01	1.85	0.655351	0.020108	0.15161	0.01	7360	98000	1200000	138	0.04	0.140344	0.520824	0.199584	0	0.0463985	4e-05	0.005456	0.005203	0.000369	14705.5	228.32	0	1	1	0.0055	0.17707	1.47055
210500	2010	212510	本溪市	0	1.84	0.586854	0.030101	0.15471	0.01	8306	105227	1200000	113	0.04	0.13538	0.640439	0.198343	0.01	0.047642	0	0.000102	4.1e-05	5e-06	16774.9	226.62	0	1	1	0.0102	0.21479	1.67749
210500	2011	212511	本溪市	0.02	1.84	0.534084	0.035214	0.17586	0.01	9833	115245	1200000	127	0.04	0.133684	0.733522	0.204559	0	0.052466	0	0.021875	0.021785	0.00063	19752.3	225.95	0	1	1	0.0149	0.25474	1.97523
210500	2012	212512	本溪市	0.01	1.82	0.551211	0.04614	0.15603	0.01	11077	122460	1200000	142	0.04	0.157834	0.70357	0.212038	0.02	0.0584248	0.006	0.000259	0.007481	5.6e-05	22466.5	227.53	0	1	1	0.0138	0.287856	2.24665
210500	2013	212513	本溪市	0.02	1.81	0.545872	0.051449	0.14861	0.01	10442	125525	1300000	150	0.04	0.152807	0.71108	0.225398	0.01	0.0635515	0.00123	0.015656	0.016783	0.002471	24960.2	228.87	0	1	1	0.0141	0.321609	2.49602
210500	2014	212514	本溪市	0.01	1.81	0.622847	0.060084	0.21411	0.01	11844	153344	1300000	173	0.04	0.158372	0.699935	0.228735	0.02	0.0618356	5.5e-05	0.014171	0.013558	0.001519	25972.3	233.34	0	1	1	0.0141	0.366635	2.59723
210500	2015	212515	本溪市	0.01	1.8	0.757245	0.009887	0.17974	0.01	11492	106752	1300000	170	0.04	0.113574	0.406475	0.236673	0.01	0.0590238	0	0.011253	0.011043	0.000294	27720.2	236.04	0	1	1	0.0188	0.30813	2.77202
210500	2016	212516	本溪市	0.01	1.79	1.19437	0.006076	0.28904	0.01	11476	114523	1300000	163	0.04	0.179525	0.403593	0.24146	0.01	0.0556858	1e-06	0.0119	0.011811	0.0003	29136.7	237.86	0	1	1	0.0242	0.349108	2.91367
210500	2017	212517	本溪市	0	1.78	1.46521	0.001337	0.32582	0.01	11475	125663	1300000	151	0.04	0.17451	0.476044	0.247492	0.01	0.0576377	0.0002	0.000261	0.000313	0.000148	31001.4	239.615	0	1	1	0.0236	0.38224	3.10014
210500	2018	212518	本溪市	0	1.77	1.55363	0.003587	0.31847	0.01	11475	120595	1400000	157	0.04	0.184017	0.413541	0.248949	0	0.0574738	3e-05	0.000644	0.000393	0.00423	32954.5	241.37	0	1	1	0.0261	0.42734	3.29545
210500	2019	212519	本溪市	0	1.76	1.8496	0.004341	0.39049	0.01	11475	102047	1400000	144	0.04	0.211033	0.409938	0.252711	0	0.0586743	0.000116	0.002029	0.001739	0.000406	35129.5	237.96	0	1	1	0.0358	4.94e-05	3.51295
210500	2020	212520	本溪市	0.02	1.76	1.77349	0.004519	0.37007	0.01	11475	112810	1400000	150	0.04	0.211762	0.406125	0.250731	0	0.0548805	3.7e-05	0.020786	0.020214	0.000609	36048.2	238.38	0	1	1	0.0433	0.250266	3.60482
210500	2021	212521	本溪市	0	1.75	1.50884	0.004599	0.36877	0.01	11475	123574	1400000	156	0.04	0.148369	0.554969	0.255272	0.02	0.0569999	2e-05	5e-07	0.000121	2e-05	39004.1	237.82	0	1	1	0.0549		3.90041
210500	2022	212522	本溪市	0	1.74	1.35014	0.004634	0.48162	0.01	11475	130130	1500000	160	0.04	0.173835	0.456649	0.250436	0	0.0562965	4e-06	1e-06	4e-06	0.000137	40107	235.95	0	1	1	0.0568		4.0107
210500	2023	212523	本溪市	0	1.73	1.44168	0.004649	0.29777	0.01	11475	136340	1500000	161	0.04	0.177266	0.465203	0.265051	0	0.0588956	0.00021	0.000115	6.5e-05	0.000261	41522	238.99	0	1	1	0.0572		4.1522
210600	2003	212603	丹东市	0	1.6	0.890736	0.010106	0.18554	0	2976	103035	566140	51	0.01	0.123426	0.395501	0.182032		0.0282052	0	5e-07	3e-07	5.2e-07	5484	225.69	0	1	1	0.0082	0.04307	0.5484
210600	2004	212604	丹东市	0	1.6	0.801385	0.008646	0.18461	0	3218	107364	575831	57	0.01	0.107014	0.42805	0.182994	0	0.0295253	0	1e-05	0.093759	0.000392	6039.19	227.04	0	1	1	0.0067	0.0586	0.603919
210600	2005	212605	丹东市	0	1.61	0.646429	0.006432	0.19772	0	3501	117335	586746	64	0.01	0.11908	0.432768	0.184765	0	0.030925	0.00015	0.003803	0.003002	7.5e-06	6880.58	225.5	0	1	1	0.0091	0.0773	0.688058
210600	2006	212606	丹东市	0	1.61	0.601054	0.011449	0.2004	0	3957	115540	599064	90	0.01	0.123429	0.46023	0.18246	0	0.0318283	5e-07	5e-07	3e-07	5e-05	7859.65	224.95	0	1	1	0.0104	0.095	0.785965
210600	2007	212607	丹东市	0	1.62	0.636195	0.0147	0.2106	0	4210	121264	612993	101	0.02	0.130085	0.478322	0.18405	0	0.0337126	5.2e-05	0.003072	4e-05	3.3e-05	9814.91	225.29	0	1	1	0.0123	0.11	0.981491
210600	2008	212608	丹东市	0.01	1.61	0.50696	0.030606	0.22522	0	4549	140000	628783	108	0.02	0.141018	0.472474	0.183086	0	0.035605	0	0.008355	0.008355	0.000601	11640.8	224.49	0	1	1	0.018	0.142	1.16408
210600	2009	212609	丹东市	0.01	1.59	0.616731	0.050003	0.27607	0	5912	144931	646727	150	0.02	0.183409	0.449947	0.184455	0.01	0.037167	6.2e-05	0.005231	0.005293	4.8e-05	12827.3	222.16	0	1	1	0.017	0.1897	1.28273
210600	2010	212610	丹东市	0.01	1.58	0.653632	0.070452	0.24193	0	6263	513300	667177	179	0.02	0.184749	0.595831	0.176316	0.01	0.0397609	0.000124	0.009634	0.009703	2.5e-06	14536	220.34	0	1	1	0.0141	0.2248	1.4536
210600	2011	212611	丹东市	0.01	1.58	0.650992	0.101688	0.29802	0	7423	166395	690557	176	0.02	0.177039	0.65672	0.178204	0.01	0.0420553	0	0.007609	0.007579	0.00064	17123.4	220.57	0	1	1	0.0199	0.2646	1.71234
210600	2012	212612	丹东市	0.01	1.57	0.659845	0.1201	0.28453	0	8302	178011	717380	199	0.02	0.193956	0.649817	0.193802	0.01	0.0500979	7e-05	0.007711	0.003264	2e-05	19625.1	221.34	0	1	1	0.0265	0.299	1.96251
210600	2013	212613	丹东市	0.01	1.57	0.71162	0.110012	0.29386	0	7723	188621	748273	210	0.02	0.202581	0.607902	0.207321	0.01	0.0541904	0.0007	0.008179	0.008873	0.000327	21744.6	222.87	0	1	1	0.0301	0.299	2.17446
210600	2014	212614	丹东市	0.04	1.57	0.903224	0.07267	0.29636	0	8493	179842	784006	224	0.02	0.201349	0.611951	0.209381	0.01	0.0532165	1e-05	0.037621	0.037621	3e-05	22931.2	225.78	0	1	1	0.034	0.3469	2.29312
210600	2015	212615	丹东市	0.02	1.56	1.04195	0.025077	0.28487	0	8263	166472	825532	196	0.02	0.216488	0.311146	0.218974	0.04	0.0521088	1e-05	0.018318	0.017718	3e-05	24724.4	226.27	0	1	1	0.0364	0.3028	2.47244
210600	2016	212616	丹东市	0.02	1.55	1.47086	0.000578	0.27617	0	8295	172819	874043	204	0.02	0.248931	0.366252	0.230565	0.02	0.0510924	1.2e-05	0.016755	0.015611	0.000297	26111.4	234.21	0	1	1	0.0448	0.401467	2.61114
210600	2017	212617	丹东市	0	1.55	1.84816	0.015363	0.26278	0	8290	196576	931045	226	0.02	0.254874	0.362633	0.223528	0.02	0.049963	0.0002	0.002052	0.001934	0.000318	27944.5	234.635	0	1	1	0.0385	0.45335	2.79445
210600	2018	212618	丹东市	0.01	1.55	1.62548	0.001369	0.25775	0	8291	191835	994037	231	0.02	0.26458	0.339622	0.226367	0	0.0510643	1e-05	0.010548	0.010284	5e-07	29872.6	235.06	0	1	1	0.0509	0.49869	2.98726
210600	2019	212619	丹东市	0.02	1.55	1.77057	0.003527	0.29158	0	8291	186033	1000000	227	0.02	0.290815	0.336384	0.230569	0.01	0.0477218	2e-05	0.023098	0.022725	0.000394	31993.6	236.18	0	1	1	0.0709	0.5594	3.19936
210600	2020	212620	丹东市	0.03	1.55	1.71433	0.002044	0.37466	0	8291	194351	1000000	236	0.02	0.314914	0.316352	0.237163	0.02	0.0470427	0.00053	0.031104	0.030942	0.000692	32345.9	235.2	0	1	1	0.0966	0.17459	3.23459
210600	2021	212621	丹东市	0	1.55	1.57567	0.002747	0.39238	0	8291	202669	1100000	246	0.02	0.232314	0.412174	0.246203	0.03	0.0517941	2e-06	0.000122	3.3e-05	3e-08	34804.2	233.08	0	1	1	0.071		3.48042
210600	2022	212622	丹东市	0	1.55	1.54845	0.002341	0.36222	0	8291	207086	1100000	252	0.02	0.260058	0.293288	0.247738	0	0.0535349	0	0.000126	0.000126	0.00027	35402	231.39	0	1	1	0.0595		3.5402
210600	2023	212623	丹东市	0	1.55	1.56213	0.002553	0.37362	0	8291	191658	1100000	254	0.02	0.253453	0.311755	0.255345	0	0.0552992	9.2e-05	0.000589	0.000617	6.4e-05	36931	232.83	0	1	1	0.0699		3.6931
210700	2003	212703	锦州市	0.01	2.98	1.05698	0.013131	0.43628	0.01	5097	131009	981580	68	0.01	0.10997	0.441784	0.136939		0.0250423	0.000545	0.008524	6.6e-07	6.1e-06	7173.93	210.5	0	1	1	0.0102	0.03062	0.717393
210700	2004	212704	锦州市	0	2.99	0.935228	0.004927	0.51415	0.01	5236	109504	995113	61	0.01	0.099154	0.420426	0.138445	0.01	0.0271254	0	0.002252	0.014752	0.003023	7985.52	209.39	0	1	1	0.0091	0.0328	0.798552
210700	2005	212705	锦州市	0	2.99	0.728255	0.006647	0.60104	0.01	5300	112525	978331	88	0.02	0.111902	0.403856	0.152293	0	0.0295071	1.9e-06	0.00302	0.001216	0.002	8862.22	216.2	0	1	1	0.0105	0.0426	0.886222
210700	2006	212706	锦州市	0	3.06	0.716972	0.009558	0.66194	0.01	5561	126634	999220	103	0.02	0.110876	0.404114	0.153665	0	0.0306068	3e-07	0	0.025766	0.000489	9980.96	218.3	0	1	1	0.0158	0.0532	0.998096
210700	2007	212707	锦州市	0	3.06	0.65847	0.014517	0.70867	0.01	5837	139398	973340	140	0.02	0.113852	0.413933	0.145656	0	0.0299537	0	0.003702	0.001059	0.003702	12010	218.03	0	1	1	0.0127	0.068	1.201
210700	2008	212708	锦州市	0.01	3.07	0.596942	0.03109	0.76534	0.01	7392	150000	1000000	152	0.03	0.117621	0.431808	0.148606	0	0.0321127	0	0.008346	0.008346	0.002321	13962.5	219.19	0	1	1	0.02	0.087	1.39625
210700	2009	212709	锦州市	0.02	3.14	0.674457	0.036805	0.79886	0.01	7695	160368	965689	200	0.03	0.153243	0.430754	0.14589	0.01	0.0332876	0	0.016472	0.016172	1.1e-05	15386.1	216.29	0	1	1	0.0164	0.1191	1.53861
210700	2010	212710	锦州市	0.02	3.12	0.63913	0.050045	0.80694	0.01	11070	171197	1000000	201	0.04	0.151699	0.585577	0.157633	0.02	0.0372	8.2e-06	0.016778	0.016759	0.000307	17375.1	218.22	0	1	1	0.0198	0.1442	1.73751
210700	2011	212711	锦州市	0.03	3.12	0.622522	0.05378	0.80686	0.01	13973	187020	954003	238	0.05	0.140891	0.658776	0.172939	0.02	0.0447355	0	0.028222	0.028222	2.5e-05	20170.8	218.36	0	1	1	0.0235	0.1704	2.01708
210700	2012	212712	锦州市	0	3.11	0.667237	0.100409	0.83673	0.01	16218	197340	1000000	271	0.05	0.164731	0.642377	0.168053	0.03	0.0485728	0.000153	0.003223	0.008489	0.000233	22994.7	218.79	0	1	1	0.0274	0.1926	2.29947
210700	2013	212713	锦州市	0.01	3.04	0.723678	0.114009	0.85265	0.01	16615	207507	936250	283	0.06	0.166716	0.606946	0.170487	0	0.0487883	0.000831	0.008538	0.008803	0.000319	25340.1	220.11	0	1	1	0.0329	0.3211	2.53401
210700	2014	212714	锦州市	0.02	3.04	0.820168	0.125457	0.86219	0.01	20311	188272	1100000	273	0.07	0.167501	0.598966	0.200451	0.01	0.0545833	3e-05	0.017636	0.01755	0.000116	25214.2	223.04	0	1	1	0.047	0.3545	2.52142
210700	2015	212715	锦州市	0.02	3.02	0.963215	0.008781	0.85209	0.01	22830	181270	909505	263	0.08	0.157877	0.360376	0.209794	0.02	0.0538701	5.5e-06	0.018492	0.018497	0.000407	27039.7	224.31	0	1	1	0.056	0.307	2.70397
210700	2016	212716	锦州市	0.03	3.04	1.3099	0.002142	0.82851	0.01	25474	204877	1100000	253	0.1	0.210197	0.390669	0.217911	0.02	0.0535486	0.005323	0.028625	0.033646	1e-05	28483.7	224.98	0	1	1	0.0718	0.234743	2.84837
210700	2017	212717	锦州市	0.02	3.02	1.58908	0.013034	0.76546	0.01	28230	206398	869734	277	0.11	0.220483	0.384189	0.210272	0.03	0.0516448	0.0006	0.018137	0.018467	0.00027	30412	229.4	0	1	1	0.0664	0.2621	3.0412
210700	2018	212718	锦州市	0	3.04	2.38185	0.005815	0.75042	0.01	31084	199025	908158	287	0.12	0.22526	0.373569	0.218699	0.02	0.053333	0.000137	0.003001	0.002057	0.000119	32489.8	233.82	0	1	1	0.0815	0.2935	3.24898
210700	2019	212719	锦州市	0.02	3.03	3.06449	0.00641	0.77635	0	34020	1500000	9200000	287	0.14	0.336432	0.282627	0.21841	0	0.0549788	0.000231	0.016966	0.017056	0.000141	34699.1	236.02	0	1	1	0.0712	0.337525	3.46991
210700	2020	212720	锦州市	0.02	3.03	3.05805	0.008117	0.89308	0	37024	833088	7200000	292	0.15	0.280813	0.345932	0.228388	0.02	0.0503114	0.000155	0.015301	0.014718	0.000738	35216.4	235.08	0	1	1	0.0914	0.131002	3.52164
210700	2021	212721	锦州市	0	3.03	3.5292	0.006936	0.9153	0	40081	209581	5100000	298	0.17	0.186818	0.510093	0.231485	0.02	0.0514182	0.000243	1e-05	0.001023	5e-05	37329.4	236.09	0	1	1	0.0771	0.19833	3.73294
210700	2022	212722	锦州市	0	3.03	2.8981	0.007701	0.92846	0	43175	215886	3100000	304	0.19	0.215252	0.401514	0.228232	0	0.052969	2.8e-05	0.001756	0.001756	0.00142	38403	233.96	0	1	1	0.0597		3.8403
210700	2023	212723	锦州市	0	3.03	2.74201	0.007183	0.93777	0	46291	224580	1100000	309	0.21	0.222601	0.40977	0.234183	0	0.0541261	7.5e-05	0.001007	0.000645	0.000438	40351	236.03	0	1	1	0.069		4.0351
210800	2003	212803	营口市	0	4.24	0.979399	0.02153	0.05227	0.01	4234	126880	2200000	52	0.01	0.097559	0.434626	0.134254		0.0226292	0	0.002436	0.005866	0.000223	7317.98	222.5	0	1	1	0.0055	0.02052	0.731798
210800	2004	212804	营口市	0.1	4.26	0.862921	0.016319	0.04975	0.01	4665	147751	2200000	66	0.02	0.095003	0.416258	0.145478	0	0.0284248	0.000442	0.095233	0.003112	0.015	8127.81	222.44	0	1	1	0.005	0.0231	0.812781
210800	2005	212805	营口市	0	4.27	0.684026	0.00784	0.06356	0.01	5204	109612	2200000	65	0.02	0.094892	0.453986	0.149936	0.1	0.0287622	9e-05	0.001266	0.000603	0.011	9008.65	226.02	0	1	1	0.0038	0.0242	0.900865
210800	2006	212806	营口市	0.03	4.28	0.711518	0.010078	0.08637	0.01	6349	121342	2200000	102	0.03	0.096042	0.46627	0.147106	0	0.0299675	0.000506	0.02526	1.2e-06	0.000393	10135.1	224.7	0	1	1	0.0065	0.0285	1.01351
210800	2007	212807	营口市	0	4.3	0.708693	0.013016	0.12602	0.01	8084	134962	2200000	93	0.03	0.107454	0.474052	0.157	0.03	0.0335465	0	0.00014	0.011622	0.000362	12143.1	224.41	0	1	1	0.006	0.045	1.21431
210800	2008	212808	营口市	0	4.33	0.672902	0.032035	0.10845	0.01	10130	153622	2200000	118	0.04	0.109838	0.517674	0.158934	0	0.0363338	0.003322	0.001571	0.004882	4.5e-05	14352.3	224.01	0	1	1	0.0092	0.0585	1.43523
210800	2009	212809	营口市	0.01	4.35	0.849989	0.050491	0.12967	0.01	11083	164600	2200000	146	0.04	0.133055	0.537216	0.16533	0	0.0382525	0	0.010466	0.010464	6.2e-05	15858	226.22	0	1	1	0.0127	0.082	1.5858
210800	2010	212810	营口市	0.02	4.49	0.811565	0.086036	0.16674	0.01	13904	172504	2200000	172	0.05	0.136953	0.729169	0.186979	0.01	0.0453648	0.0001	0.023825	0.023925	5e-07	18054.6	228.24	0	1	1	0.014	0.1074	1.80546
210800	2011	212811	营口市	0	4.49	0.788764	0.110283	0.16619	0.01	14893	191845	2200000	205	0.06	0.149557	0.76569	0.179699	0.02	0.0462287	0	0.001534	0.001312	5.2e-05	20893.7	229.16	0	1	1	0.021	0.1279	2.08937
210800	2012	212812	营口市	0.01	4.48	0.817382	0.12133	0.21368	0.01	16182	209528	2200000	225	0.06	0.160032	0.770102	0.209103	0	0.0591697	3.6e-05	0.008564	9e-05	4e-05	23986	230.5	0	1	1	0.024	0.1446	2.3986
210800	2013	212813	营口市	0.02	4.44	0.866706	0.133041	0.22039	0.01	18250	220107	2200000	244	0.07	0.163741	0.743686	0.203039	0.01	0.0576006	0.00141	0.013743	0.014364	2e-05	26600.5	231.8	0	1	1	0.0233	0.162	2.66005
210800	2014	212814	营口市	0.02	4.45	0.977547	0.140134	0.22248	0.01	18947	206224	2300000	237	0.08	0.14207	0.73006	0.219735	0.02	0.0564016	6e-05	0.023165	0.022234	0.00089	28222.3	234.45	0	1	1	0.0193	0.1835	2.82223
210800	2015	212815	营口市	0.04	4.44	1.07845	0.005096	0.21303	0.01	19890	191367	2300000	203	0.09	0.113625	0.60505	0.225773	0.02	0.056133	0	0.03659	0.036494	9e-05	30457.5	236.31	0	1	1	0.0259	0.1605	3.04575
210800	2016	212816	营口市	0.01	4.44	1.60386	0.002414	0.21155	0.01	20727	199773	2300000	211	0.1	0.171146	0.531531	0.238521	0.04	0.0559098	0.00026	0.008621	0.008581	0.000116	32318.5	239.03	0	1	1	0.0323	0.23996	3.23185
210800	2017	212817	营口市	0.01	4.44	1.66972	0.012038	0.21554	0.01	21467	222511	2400000	231	0.11	0.170579	0.52455	0.237182	0.01	0.057459	0.00046	0.01042	0.009768	0.001112	34419.2	239.205	0	1	1	0.04	0.2676	3.44192
210800	2018	212818	营口市	0.03	4.44	1.48578	0.014646	0.20348	0.02	22115	212294	2700000	236	0.12	0.169125	0.576605	0.245717	0.01	0.0618061	0.005316	0.020543	0.021629	4.7e-05	37035	239.38	0	1	1	0.0535	0.2756	3.7035
210800	2019	212819	营口市	0.02	4.44	1.73766	0.013974	0.23781	0.02	22682	206107	2900000	232	0.13	0.191635	0.523062	0.24353	0.03	0.0629298	0.000356	0.015233	0.015349	0.00024	39405.3	237.46	0	1	1	0.0727	0.308672	3.94053
210800	2020	212820	营口市	0.02	4.44	1.98097	0.014636	0.29613	0.02	23174	213180	2900000	243	0.14	0.202822	0.505238	0.245888	0.02	0.0605313	0.001017	0.018404	0.01248	0.00694	39792.6	238.79	0	1	1	0.0955	0.203415	3.97926
210800	2021	212821	营口市	0	4.44	1.567	0.014452	0.32382	0.02	23601	220252	2800000	254	0.15	0.18221	0.55319	0.248115	0.02	0.0629932	2.3e-05	0.00102	0.000379	3e-08	42299.5	237.13	0	1	1	0.0946		4.22995
210800	2022	212822	营口市	0	4.44	1.53594	0.014502	0.17203	0.02	23970	229390	2800000	261	0.16	0.175549	0.514512	0.249375	0	0.0643696	1.2e-05	0.003066	6.5e-05	1.1e-05	42977	237.25	0	1	1	0.091		4.2977
210800	2023	212823	营口市	0	4.44	1.56148	0.014489	0.30344	0.02	24288	219504	2800000	264	0.17	0.169798	0.545881	0.257886	0	0.0659704	0.000765	0.000591	0.000879	0.000477	45119	239.65	0	1	1	0.0897		4.5119
210900	2003	212903	阜新市	0	1.86	1.70487	0.00223	0.22581	0	4377	26068	237336	39	0.01	0.21158	0.256075	0.139323		0.0211668	0	1e-06	2.7e-06	0.001531	5142.99	215.76	0	1	1	0.0044	0.00743	0.514299
210900	2004	212904	阜新市	0.02	1.86	1.46003	0.002636	0.28257	0	4450	92000	249790	43	0.01	0.187301	0.262507	0.141874	0	0.0229397	0.006223	0.008531	0.006245	1.5e-05	5622.54	212.4	0	1	1	0.0066	0.0085	0.562254
210900	2005	212905	阜新市	0	1.86	1.62855	0.001328	0.3233	0	4526	96470	262935	44	0.01	0.239645	0.21752	0.14469	0.02	0.0228224	0	0.002546	0.008461	0.001285	6656.32	214.92	0	1	1	0.0078	0.0102	0.665632
210900	2006	212906	阜新市	0	1.86	1.11992	0.001844	0.26903	0	4841	114889	276811	65	0.01	0.248947	0.22709	0.146985	0	0.0236612	0	0.000146	0.003001	3e-06	7598.21	219.66	0	1	1	0.0071	0.0135	0.759821
210900	2007	212907	阜新市	0	1.86	1.07237	0.002521	0.374	0	2587	129794	291460	91	0.01	0.241867	0.234943	0.146453	0	0.0248196	0.001058	4.1e-05	0.003	0.000245	8702.29	216.98	0	1	1	0.0077	0.0242	0.870229
210900	2008	212908	阜新市	0.01	1.86	1.00672	0.005166	0.34046	0	2707	95601	306927	103	0.01	0.221013	0.282665	0.14848	0	0.0264903	0	0.006166	0.006146	3e-05	10113.8	214.41	0	1	1	0.0087	0.0341	1.01138
210900	2009	212909	阜新市	0.01	1.86	1.04373	0.006413	0.36211	0	4181	197371	323262	126	0.01	0.277017	0.233136	0.146745	0.01	0.0271583	0	0.0066	0.0066	5e-06	11116.5	213.53	0	1	1	0.0077	0.0523	1.11165
210900	2010	212910	阜新市	0	1.86	0.948484	0.011013	0.41355	0	4659	92611	340514	121	0.01	0.232991	0.340651	0.149543	0.01	0.0301234	0	0.00306	0.00303	0.003186	12710.8	208.26	0	1	1	0.012	0.06583	1.27108
210900	2011	212911	阜新市	0.01	1.85	0.905387	0.014958	0.45379	0	5169	104296	358738	142	0.01	0.267271	0.390646	0.151218	0	0.0333059	0	0.012846	0.012846	0.00039	14993.7	208.73	0	1	1	0.0172	0.07584	1.49937
210900	2012	212912	阜新市	0	1.85	0.945228	0.018295	0.43005	0	5434	112409	377992	167	0.01	0.259658	0.440374	0.167693	0.01	0.040696	6.6e-05	3e-05	6e-05	2e-06	17123.4	208.51	0	1	1	0.0208	0.0856992	1.71234
210900	2013	212913	阜新市	0.01	1.85	1.01991	0.020506	0.45688	0	5707	120896	398336	180	0.01	0.279679	0.409777	0.168042	0	0.0404209	6e-05	0.005053	0.005113	5.1e-05	19058.3	209.29	0	1	1	0.0251	0.0923593	1.90583
210900	2014	212914	阜新市	0.01	1.84	1.15397	0.025106	0.45017	0	5978	112648	419835	174	0.01	0.289152	0.406308	0.17505	0.01	0.041921	0	0.005549	0.004422	0.005526	21194.8	214.9	0	1	1	0.0243	0.10429	2.11948
210900	2015	212915	阜新市	0	1.83	1.47654	0.001669	0.41661	0	6039	105625	442559	140	0.01	0.247353	0.285802	0.183901	0.01	0.0410471	0.00072	0.003129	0.003759	8.1e-05	22661.5	215.77	0	1	1	0.0315	0.0996	2.26615
210900	2016	212916	阜新市	0.01	1.83	2.0582	0.000677	0.38192	0	6004	120845	466580	150	0.01	0.338326	0.259752	0.201482	0	0.0416736	6.5e-05	0.012244	0.012013	3.3e-05	23980.4	224.56	0	1	1	0.0361	0.114041	2.39804
210900	2017	212917	阜新市	0.01	1.83	2.2645	0.023908	0.3652	0	6024	124103	491976	164	0.01	0.356234	0.261964	0.204645	0.01	0.0426179	0.00018	0.010351	0.010431	0.0001	25707	226.62	0	1	1	0.0381	0.13096	2.5707
210900	2018	212918	阜新市	0.01	1.84	2.24167	0.004489	0.36105	0	6013	116396	537632	166	0.01	0.356559	0.264201	0.207059	0.01	0.0433028	0.000225	0.006861	0.007085	0.000276	27609.3	228.68	0	1	1	0.0495	0.14812	2.76093
210900	2019	212919	阜新市	0.03	1.84	2.08378	0.002081	0.41237	0	6019	114682	541308	175	0.01	0.365109	0.239438	0.209531	0.01	0.0454124	0.00021	0.026998	0.026952	0.000256	29514.4	228.96	0	1	1	0.0598	0.16295	2.95144
210900	2020	212920	阜新市	0.01	1.84	2.01035	0.002868	0.47285	0	6016	122024	577242	180	0.01	0.374061	0.235106	0.224268	0.03	0.0449491	1e-05	0.005633	0.005342	0.0003	30437.7	227.72	0	1	1	0.0751	0.072368	3.04377
210900	2021	212921	阜新市	0	1.84	1.88158	0.003061	0.43915	0	6018	129367	613176	185	0.01	0.261598	0.332009	0.21699	0.01	0.045517	0	3e-08	1e-05	0.00023	32842.3	227.07	0	1	1	0.0933		3.28423
210900	2022	212922	阜新市	0	1.84	1.80758	0.003102	0.54555	0	6017	137309	649110	188	0.01	0.278584	0.278421	0.215873	0	0.0459039	2e-05	1e-06	1e-06	2e-05	33602	226.68	0	1	1	0.0644		3.3602
210900	2023	212923	阜新市	0	1.84	1.75362	0.00311	0.46925	0	6017	142749	685044	188	0.01	0.288375	0.273154	0.222369	0	0.0473906	5e-05	0.000672	0.00036	0.000362	34821	229.88	0	1	1	0.0563		3.4821
211000	2003	213003	辽阳市	0	3.84	0.885426	0.004005	0.06426	0.01	3943	87634	627390	37	0.01	0.093431	0.524138	0.152634		0.0252233	0	6.9e-06	0.001263	1.4e-06	6683.91	228.15	0	1	1	0.0052	0.01607	0.668391
211000	2004	213004	辽阳市	0	3.85	0.743624	0.004581	0.13368	0.01	4464	103000	630408	47	0.02	0.087578	0.552468	0.154567	0	0.0280354	0.003111	1e-06	0.016887	0.000855	7307.43	229.05	0	1	1	0.0061	0.0214	0.730743
211000	2005	213005	辽阳市	0.01	3.84	0.641681	0.006217	0.09641	0.01	4934	117962	634298	48	0.02	0.10505	0.5028	0.144804	0	0.0282507	3.3e-05	0.008428	0.003076	9e-07	8407.53	222.2	0	1	1	0.0033	0.027	0.840753
211000	2006	213006	辽阳市	0	3.85	0.637919	0.005121	0.07892	0.01	4740	169857	639318	62	0	0.097774	0.57009	0.143467	0.01	0.0287244	5e-07	0.003082	0.003021	4.5e-05	9649.12	222.7	0	1	1	0.0054	0.051	0.964912
211000	2007	213007	辽阳市	0.01	3.87	0.604741	0.006178	0.13342	0.01	5108	204619	645809	74	0.03	0.109075	0.550507	0.152947	0	0.0325207	0.000162	0.0115	5.8e-05	0.004989	11240.7	222.39	0	1	1	0.0061	0.079	1.12407
211000	2008	213008	辽阳市	0	3.87	0.566984	0.020038	0.18184	0.01	7257	119445	654226	82	0.04	0.104463	0.598187	0.157433	0.01	0.0348552	2e-06	0.002067	0.002046	0.000265	13262.4	223.12	0	1	1	0.0094	0.103	1.32624
211000	2009	213009	辽阳市	0.02	3.87	0.687382	0.081718	0.18918	0.01	7905	119000	665174	130	0.01	0.132641	0.594626	0.161459	0	0.0370834	0	0.018523	0.018523	5e-05	14567.6	222.82	0	1	1	0.0097	0.12742	1.45676
211000	2010	213010	辽阳市	0.01	3.87	0.698901	0.033352	0.1988	0.01	8650	121768	679473	125	0.02	0.136068	0.764284	0.17644	0.02	0.0411387	0	0.011274	0.01127	0.000117	16570.3	223.3	0	1	1	0.0086	0.16616	1.65703
211000	2011	213011	辽阳市	0.02	3.82	0.66334	0.039118	0.19672	0.01	10904	130775	698251	144	0.02	0.138525	0.813699	0.170383	0.01	0.0444666	1e-05	0.01642	0.01643	0.013	19469.2	223.15	0	1	1	0.0122	0.19092	1.94692
211000	2012	213012	辽阳市	0	3.81	0.698395	0.045093	0.19095	0.01	13973	137559	723077	167	0.02	0.137328	0.802173	0.190648	0.02	0.0546637	3e-05	0.000153	0.000241	0.000268	22259.4	223.18	0	1	1	0.0168	0.21574	2.22594
211000	2013	213013	辽阳市	0.01	3.8	0.74801	0.052009	0.1701	0.01	14686	143146	756191	182	0.02	0.150699	0.683991	0.198273	0	0.0571453	0.00141	0.006087	0.007092	0.000101	24618.9	223.54	0	1	1	0.0167	0.245424	2.46189
211000	2014	213014	辽阳市	0.01	3.8	0.898413	0.060003	0.17281	0.01	15904	133992	800857	186	0.02	0.16165	0.699944	0.217227	0.01	0.0566955	0	0.013931	0.013911	0.000346	24382.3	227.77	0	1	1	0.0146	0.27942	2.43823
211000	2015	213015	辽阳市	0.01	3.74	0.99847	0.036477	0.26616	0.01	15322	120209	861983	185	0.02	0.144161	0.456462	0.224871	0.01	0.055911	2.6e-05	0.005427	0.00516	0.001993	26389	229.61	0	1	1	0.015	0.2416	2.6389
211000	2016	213016	辽阳市	0.01	3.71	1.78689	0.00839	0.1718	0.01	15857	135754	947194	167	0.02	0.217931	0.496438	0.23773	0.01	0.0519509	0	0.00644	0.00643	8e-06	28133.3	237	0	1	1	0.0248	0.221599	2.81333
211000	2017	213017	辽阳市	0.01	3.69	1.78921	0.003494	0.16413	0.01	15364	138320	1100000	178	0.02	0.194851	0.542837	0.23071	0.01	0.0521091	0.001095	0.004542	0.004566	0.001071	30198.3	233.94	0	1	1	0.0339	0.24896	3.01983
211000	2018	213018	辽阳市	0.01	3.67	1.92881	0.00546	0.16216	0.01	15818	132823	1200000	183	0.02	0.183302	0.560704	0.228839	0.01	0.054266	8e-06	0.012187	0.012076	0.000102	32221.6	230.88	0	1	1	0.037	0.26714	3.22216
211000	2019	213019	辽阳市	0.01	3.66	2.91047	0.006484	0.20516	0.01	15399	131688	1200000	185	0.02	0.223194	0.513898	0.235765	0.01	0.0557949	8.5e-05	0.008592	0.007865	0.000812	34573.7	232.23	0	1	1	0.0442	0.299148	3.45737
211000	2020	213020	辽阳市	0.01	3.65	3.3488	0.006287	0.24785	0.01	15784	136979	1200000	185	0.02	0.240073	0.48809	0.247266	0.01	0.0581647	6e-05	0.009578	0.008968	0.00067	34814.3	232.89	0	1	1	0.0544	0.127022	3.48143
211000	2021	213021	辽阳市	0	3.63	2.246	0.00636	0.25622	0.01	15429	142270	1200000	185	0.02	0.187105	0.613162	0.248015	0.01	0.0588788	0.000348	8.1e-05	0.0001	7e-05	36868.3	231.91	0	1	1	0.0497		3.68683
211000	2022	213022	辽阳市	0	3.62	1.32986	0.006333	0.23063	0.01	15756	142270	1200000	185	0.02	0.191838	0.510638	0.251153	0	0.0597845	2.1e-05	0.000337	0.000221	0.007569	37640	231.34	0	1	1	0.0377		3.764
211000	2023	213023	辽阳市	0	3.62	1.43474	0.006343	0.23336	0.01	15455	146503	1200000	193	0.02	0.242536	0.374828	0.261336	0	0.0605906	0.000135	0.000915	0.000652	0.000399	39378	235.47	0	1	1	0.0393		3.9378
211100	2003	213103	盘锦市	0	3.06	0.4563	0.0081	0.02889	0.02	2882	102838	309852	40	0.02	0.062643	0.802083	0.138126		0.0297912	3e-06	0	8.1e-05	2.5e-06	8383.74	206.91	0	1	1	0.012	0.01598	0.838374
211100	2004	213104	盘锦市	0.01	3.07	0.374005	0.009862	0.034	0.02	4040	128047	325013	44	0.01	0.067469	0.743495	0.143232	0	0.0334334	0.006222	2.4e-05	0.012762	1.5e-05	9509.47	207.78	0	1	1	0.0195	0.0198	0.950947
211100	2005	213105	盘锦市	0	3.09	0.30399	0.001464	0.03397	0.02	4310	138285	341999	47	0.02	0.074107	0.658513	0.141915	0.01	0.0331014	5e-05	0.003039	0.00842	9e-07	11025.3	205.53	0	1	1	0.0161	0.026	1.10253
211100	2006	213106	盘锦市	0	3.12	0.318343	0.002052	0.04032	0.02	4023	160356	361092	55	0.02	0.078815	0.64666	0.150337	0	0.0364665	0.00035	0.003021	0.0084	0.000421	12205.5	206.03	0	1	1	0.0309	0.0454	1.22055
211100	2007	213107	盘锦市	0	3.15	0.355839	0.002624	0.05012	0.02	4595	201300	382628	58	0.03	0.08523	0.618836	0.160153	0	0.0394474	0	0.00304	0.035906	5e-06	14907.3	206.02	0	1	1	0.0306	0.076	1.49073
211100	2008	213108	盘锦市	0.01	3.17	0.35906	0.00839	0.06085	0.02	5415	90000	407011	74	0.04	0.086352	0.598952	0.168009	0	0.0405644	0	0.008377	0.008337	5e-06	17046	206.12	0	1	1	0.0182	0.098	1.7046
211100	2009	213109	盘锦市	0.01	3.19	0.540293	0.030178	0.06232	0.02	5761	103269	434727	95	0.04	0.1226	0.523382	0.199689	0.01	0.0462364	0.0056	0.004647	0.00458	0.006671	18563.2	216.2	0	1	1	0.0235	0.127	1.85632
211100	2010	213110	盘锦市	0	3.22	0.475233	0.091335	0.05392	0.02	7222	105435	466366	110	0.04	0.118343	0.735126	0.19152	0.01	0.0508559	0	0.003007	0.003	2e-06	21035.4	214.85	0	1	1	0.0141	0.1654	2.10354
211100	2011	213111	盘锦市	0.01	3.22	0.464898	0.200108	0.04971	0.02	9138	117296	502647	131	0.04	0.128692	0.779075	0.210101	0	0.0568732	0	0.012269	0.012269	0.00723	24265.9	214.1	0	1	1	0.0189	0.1959	2.42659
211100	2012	213112	盘锦市	0	3.17	0.497355	0.161004	0.05687	0.02	10952	147658	544451	148	0.04	0.146332	0.769704	0.214853	0.01	0.0658316	3e-05	0.000232	0.000425	0.001462	27532.8	213.82	0	1	1	0.0257	0.2214	2.75328
211100	2013	213113	盘锦市	0	3.17	0.492616	0.150334	0.06264	0.02	13083	134683	592868	161	0.04	0.144523	0.761896	0.232065	0	0.0700927	0.00076	0.001008	0.001707	0.18	30148.4	214.59	0	1	1	0.0365	0.1912	3.01484
211100	2014	213114	盘锦市	0.03	3.18	0.613321	0.074895	0.07056	0.02	14307	124326	649253	156	0.04	0.156536	0.740646	0.242229	0	0.0683364	0	0.027235	0.025715	4.8e-05	30857.4	224.72	0	1	1	0.0414	0.2299	3.08574
211100	2015	213115	盘锦市	0.03	3.2	0.665758	0.023246	0.07093	0.02	14122	118955	715302	142	0.04	0.137903	0.548514	0.250892	0.03	0.067131	0	0.027081	0.027051	0.000111	32465.1	226.27	0	1	1	0.0514	0.1993	3.24651
211100	2016	213116	盘锦市	0.03	3.21	0.836799	0.018501	0.06865	0.02	14198	135054	793156	143	0.04	0.181823	0.548727	0.259717	0.03	0.0659663	0.00159	0.02795	0.029424	0.000542	34322.1	229.41	0	1	1	0.0503	0.226215	3.43221
211100	2017	213117	盘锦市	0	3.22	0.838031	0.019744	0.06783	0.02	14166	165033	885537	155	0.04	0.169809	0.643844	0.262485	0.03	0.0677715	0.000209	0.000843	0.000693	0.000359	36484.4	230.915	0	1	1	0.0623	0.2625	3.64844
211100	2018	213118	盘锦市	0.01	3.23	0.782036	0.025923	0.07003	0.03	14179	135590	965772	161	0.04	0.168925	0.660279	0.260248	0	0.0701494	1.2e-05	0.008978	0.008942	8.6e-05	39111.3	232.42	0	1	1	0.0688	0.3037	3.91113
211100	2019	213119	盘锦市	0.02	3.24	0.905623	0.04433	0.08103	0.03	14174	130480	1000000	158	0.04	0.181823	0.635263	0.258923	0.01	0.0726333	0.0001	0.016287	0.015591	0.000796	41575.3	229.6	0	1	1	0.0697	0.3595	4.15753
211100	2020	213120	盘锦市	0.02	3.26	0.980979	0.049688	0.08571	0.03	14176	136564	1100000	164	0.04	0.187239	0.648644	0.259599	0.02	0.0725465	2.5e-05	0.023419	0.023323	0.000121	42787.9	228.16	0	1	1	0.0812	0.234336	4.27879
211100	2021	213121	盘锦市	0	3.27	1.0625	0.050893	0.09366	0.03	14175	142649	1200000	169	0.04	0.142029	0.807203	0.266025	0.02	0.074453	1e-05	3e-08	0.00111	0.008464	45398	229.22	0	1	1	0.0856	0.29897	4.5398
211100	2022	213122	盘锦市	0	3.28	1.07714	0.05115	0.09236	0.03	14176	152174	1200000	176	0.04	0.153525	0.567076	0.267565	0	0.0754863	5.7e-05	0.000509	0.000296	0.000182	46485	228.37	0	1	1	0.0618		4.6485
211100	2023	213123	盘锦市	0	3.29	1.13464	0.051204	0.10245	0.03	14175	159693	1300000	179	0.04	0.152024	0.617051	0.276612	0	0.0760627	0.000205	0.000674	0.000478	0.000401	48999	232.98	0	1	1	0.0521		4.8999
211200	2003	213203	铁岭市	0	2.31	1.16207	0.010196	0.01394	0	3563	63140	460771	41	0.01	0.137813	0.394713	0.112656		0.0181359	5e-07	0	8.8e-07	2.5e-05	5606.59	203.83	0	1	1	0.0033	0.01136	0.560659
211200	2004	213204	铁岭市	0.02	2.32	1.04875	0.008109	0.01538	0	4243	68648	476180	58	0.01	0.127787	0.39363	0.110861	0	0.0196368	0.016836	5.1e-05	0.012443	0.000432	5723.75	204.18	0	1	1	0.0038	0.0142	0.572375
211200	2005	213205	铁岭市	0.01	2.33	0.891341	0.001564	0.02412	0	5218	78144	492224	58	0.01	0.133719	0.361903	0.11412	0.02	0.0205011	0	0.00842	0.008513	0.001531	6526.33	205.71	0	1	1	0.0036	0.0185	0.652633
211200	2006	213206	铁岭市	0.01	2.35	0.829843	0.003172	0.03954	0	5967	95758	508933	79	0.01	0.139089	0.361973	0.115822	0.01	0.0216607	0.0024	0.00601	0.000702	2.8e-05	7437.05	206.86	0	1	1	0.0065	0.036	0.743705
211200	2007	213207	铁岭市	0	2.35	0.767444	0.008656	0.06051	0	6377	110399	526340	85	0.02	0.148038	0.385367	0.119278	0.01	0.0245372	0.000111	0.000293	0.006631	0.000113	8978.94	204.66	0	1	1	0.0078	0.055	0.897894
211200	2008	213208	铁岭市	0.01	2.36	0.633801	0.012021	0.07711	0	7248	120000	544477	108	0.02	0.144304	0.42755	0.115014	0	0.0257917	0	0.00872	0.00872	0.00032	10907.2	204.49	0	1	1	0.0091	0.072	1.09072
211200	2009	213209	铁岭市	0.01	2.36	0.700064	0.017197	0.08776	0	8330	126194	563381	189	0.02	0.181132	0.43737	0.11199	0.01	0.0258142	0	0.00512	0.00511	0.004363	12054.7	206.25	0	1	1	0.01	0.088	1.20547
211200	2010	213210	铁岭市	0.01	2.35	0.670704	0.026288	0.16491	0	9804	131573	583088	146	0.02	0.196064	0.565623	0.129873	0.01	0.0313366	0	0.014048	0.014048	0.000414	13730	206.88	0	1	1	0.012	0.10806	1.373
211200	2011	213211	铁岭市	0.02	2.35	0.634097	0.030345	0.15047	0	11772	146939	603637	170	0.02	0.192043	0.625832	0.13397	0.01	0.0371136	0	0.016126	0.01612	0.000558	16203.4	206.88	0	1	1	0.0184	0.12708	1.62034
211200	2012	213212	铁岭市	0	2.33	0.628957	0.040217	0.17329	0	11303	147540	625071	205	0.02	0.205358	0.57225	0.14666	0.02	0.0422565	8e-05	0.000346	6e-05	0.004567	18586.9	207.56	0	1	1	0.0285	0.1336	1.85869
211200	2013	213213	铁岭市	0.01	2.32	0.681029	0.055539	0.17894	0	8564	165894	647433	226	0.02	0.212876	0.472084	0.15066	0	0.0421806	0.000784	0.013693	0.014393	0.044	20575.7	208.5	0	1	1	0.026	0.166072	2.05757
211200	2014	213214	铁岭市	0.03	2.33	0.892128	0.055894	0.16626	0	9011	160305	670770	231	0.02	0.241075	0.446675	0.164775	0.01	0.0413944	5e-06	0.027514	0.027489	4.2e-05	19276.3	209.53	0	1	1	0.0191	0.19495	1.92763
211200	2015	213215	铁岭市	0.02	2.31	1.09249	0.016617	0.18011	0	8947	147345	695129	205	0.02	0.281164	0.241389	0.173371	0.03	0.0402557	0	0.01709	0.016683	2e-05	20689.2	211.85	0	1	1	0.0209	0.1691	2.06892
211200	2016	213216	铁岭市	0.02	2.4	1.4305	0.005337	0.18809	0	8900	163008	720564	198	0.02	0.342039	0.281316	0.178003	0.02	0.0407237	6.5e-05	0.021364	0.021396	0.001201	21787.8	218.98	0	1	1	0.0193	0.179979	2.17878
211200	2017	213217	铁岭市	0.02	2.4	1.52162	0.001147	0.18196	0	8866	162836	747127	220	0.02	0.319002	0.259162	0.183565	0.02	0.0416171	0.000101	0.016759	0.016549	0.000311	23336.9	220.085	0	1	1	0.0225	0.20031	2.33369
211200	2018	213218	铁岭市	0	2.4	1.41164	0.003624	0.17472	0	8841	166251	774308	229	0.02	0.343814	0.246231	0.183441	0.02	0.0415796	0.00171	0.000508	0.001941	0.003363	24993.8	221.19	0	1	1	0.0273	0.20031	2.49938
211200	2019	213219	铁岭市	0.03	2.4	1.39555	0.002055	0.26199	0	8822	149363	801490	233	0.02	0.355098	0.219762	0.187493	0	0.0422462	5e-07	0.0287	0.028432	0.000268	26743.4	222.73	0	1	1	0.0342	0.243307	2.67434
211200	2020	213220	铁岭市	0.02	2.4	1.36221	0.002068	0.31893	0	8809	158108	828671	243	0.02	0.357312	0.212786	0.194746	0.03	0.0404822	0.000701	0.016578	0.016164	0.001114	27633.6	221.92	0	1	1	0.0552	0.068935	2.76336
211200	2021	213221	铁岭市	0	2.4	1.13316	0.002073	0.38229	0	8799	166852	855852	253	0.02	0.272704	0.258306	0.195508	0.02	0.03991	0.0002	0.00013	0.003405	6.1e-05	29954.8	222.33	0	1	1	0.0434	0.15109	2.99548
211200	2022	213222	铁岭市	0	2.4	1.10795	0.002076	0.28896	0	8791	159096	883034	253	0.02	0.283677	0.212716	0.200474	0	0.0426325	0	0.001644	0.000224	0.02	30559	221.38	0	1	1	0.0419		3.0559
211200	2023	213223	铁岭市	0	2.4	1.14353	0.002077	0.26184	0	8786	181367	910215	256	0.02	0.311411	0.216638	0.220265	0	0.0466276	0.000184	0.00014	0.000286	3.8e-05	31912	225.67	0	1	1	0.0444		3.1912
211300	2003	213303	朝阳市	0	1.71	1.74015	0.003088	0.02532	0	3798	79080	244841	39	0.01	0.224626	0.232712	0.11213		0.0163614	3e-07	2.1e-06	0.005139	0.001827	5148.69	209.68	0	1	1	0.004	0.01085	0.514869
211300	2004	213304	朝阳市	0.01	1.71	1.45463	0.002434	0.02787	0	3954	104737	262981	52	0.01	0.207036	0.25142	0.111674	0	0.0184786	0.012443	0.000318	0.006223	0.000157	5683.24	205.49	0	1	1	0.0015	0.013	0.568324
211300	2005	213305	朝阳市	0.01	1.72	0.937262	0.000584	0.03488	0	4030	118970	283288	67	0.01	0.185016	0.278613	0.114167	0.01	0.0191911	4.5e-05	0.008498	0.034518	0.008314	6599.46	207.7	0	1	1	0.0026	0.024	0.659946
211300	2006	213306	朝阳市	0	1.73	0.912819	0.002494	0.04068	0	4341	157156	306087	80	0.01	0.198404	0.295451	0.111973	0.01	0.01987	2e-06	0.0007	0.00026	0.000217	7440.18	207.65	0	1	1	0.0033	0.0372	0.744018
211300	2007	213307	朝阳市	0.04	1.73	0.870639	0.00413	0.04201	0.01	4652	102711	331764	117	0.01	0.208505	0.312759	0.108885	0	0.0204326	9.7e-05	0.037992	1e-05	1.5e-05	9009.59	205.29	0	1	1	0.0035	0.0544	0.900959
211300	2008	213308	朝阳市	0.09	1.73	0.660935	0.00502	0.05035	0	4794	120000	360775	122	0.02	0.208056	0.342081	0.108893	0.04	0.0225289	0.062335	0.030267	0.089868	6e-06	10517.1	205.38	0	1	1	0.0045	0.0709	1.05171
211300	2009	213309	朝阳市	0	1.74	0.695655	0.007332	0.04201	0.01	3702	129914	393663	173	0.02	0.234412	0.347059	0.113064	0.09	0.0235999	0	0.00171	0.001565	0.000155	11553.7	209.48	0	1	1	0.0068	0.09401	1.15537
211300	2010	213310	朝阳市	0.02	1.72	0.662391	0.011039	0.03523	0	4259	135201	431077	171	0.03	0.223571	0.451439	0.123207	0	0.0277623	0	0.017275	0.017275	8e-06	12960.5	206.96	0	1	1	0.0108	0.11648	1.29605
211300	2011	213311	朝阳市	0.01	1.73	0.644449	0.014269	0.04025	0.01	4621	150748	473793	199	0.04	0.213187	0.501505	0.122024	0.02	0.0299558	0	0.013739	0.013739	6e-06	14957.8	205.77	0	1	1	0.0132	0.13232	1.49578
211300	2012	213312	朝阳市	0	1.73	0.660228	0.018103	0.04766	0	5110	155410	522748	233	0.04	0.232144	0.501058	0.147148	0.01	0.0425092	0	6e-05	0.00838	5e-07	17111.7	204.97	0	1	1	0.0162	0.139522	1.71117
211300	2013	213313	朝阳市	0	1.72	0.719129	0.02102	0.04952	0.01	5792	179869	579072	249	0.05	0.228404	0.491092	0.150302	0	0.0421774	0	0.000809	0.000809	0.012	18891.4	205.61	0	1	1	0.0161	0.14311	1.88914
211300	2014	213314	朝阳市	0	1.73	0.834316	0.025032	0.0547	0	6203	169506	644140	255	0.06	0.229456	0.446121	0.166313	0	0.0436078	0	0.004415	0.004299	0.000554	19633.9	213.21	0	1	1	0.0178	0.16311	1.96339
211300	2015	213315	朝阳市	0.01	1.73	1.07332	0.001387	0.05192	0.01	6272	168504	719631	205	0.07	0.227046	0.282038	0.184941	0	0.0433127	1e-06	0.014451	0.014362	0.0032	21210.5	217.01	0	1	1	0.0246	0.1398	2.12105
211300	2016	213316	朝阳市	0.02	1.73	1.38525	0.001337	0.05393	0	6301	186098	807602	216	0.07	0.300292	0.237118	0.197583	0.01	0.0429425	8e-06	0.017793	0.017793	0.00013	22381.3	224.38	0	1	1	0.0261	0.21689	2.23813
211300	2017	213317	朝阳市	0.01	1.73	1.38679	0.006542	0.05393	0.01	6313	172510	910589	239	0.08	0.307348	0.246927	0.193393	0.02	0.0429293	1.6e-05	0.014173	0.014189	1e-05	23925.7	226.275	0	1	1	0.0348	0.243823	2.39257
211300	2018	213318	朝阳市	0.01	1.74	1.34701	0.005886	0.05635	0	6318	174765	1000000	248	0.09	0.322452	0.262655	0.202949	0.01	0.045926	0.000116	0.013987	0.014001	0.000489	25461.9	228.17	0	1	1	0.0319	0.283662	2.54619
211300	2019	213319	朝阳市	0.02	1.74	1.30848	0.009713	0.0908	0.01	6320	182945	1100000	245	0.1	0.356537	0.24839	0.200089	0.01	0.0468445	1.7e-05	0.015862	0.013682	0.002197	27015.1	223.46	0	1	1	0.0485	0.323117	2.70151
211300	2020	213320	朝阳市	0.01	1.74	1.30979	0.008718	0.10231	0	6321	195806	1200000	262	0.11	0.369767	0.240104	0.207091	0.02	0.0456904	0.00042	0.011176	0.010067	0.001529	27997.2	222.75	0	1	1	0.1038	0.184928	2.79972
211300	2021	213321	朝阳市	0	1.74	1.18818	0.008183	0.10553	0.01	6321	208668	1200000	279	0.12	0.297115	0.300335	0.209444	0.01	0.0480444	5e-05	0.00113	0.000133	1.2e-05	30041	221.64	0	1	1	0.0741		3.0041
211300	2022	213322	朝阳市	0	1.74	1.16903	0.007886	0.08585	0	6321	216212	1300000	285	0.12	0.304573	0.261916	0.2129	0	0.0497825	1e-05	4.1e-05	4e-05	8.6e-05	30803	220.64	0	1	1	0.0639		3.0803
211300	2023	213323	朝阳市	0	1.75	1.153	0.007717	0.07289	0.01	6321	222569	1400000	291	0.13	0.304898	0.259707	0.220604	0	0.051697	0.000148	0.000323	0.000227	0.000244	31951	223.47	0	1	1	0.0601		3.1951
211400	2003	213403	葫芦岛市	0	2.61	0.996229	0.004595	0.02713	0.01	3769	73012	574725	41	0.02	0.104923	0.528946	0.118274		0.0193576	6.3e-05	0.000101	0.002468	0.000496	7061.71	221.49	0	1	1	0.0058	0.03036	0.706171
211400	2004	213404	葫芦岛市	0.01	2.62	0.855639	0.002179	0.07146	0.01	1125	84244	596141	55	0.03	0.100135	0.498701	0.117528	0	0.0212163	0.012443	0	0.033308	5e-07	7770.77	219.33	0	1	1	0.0046	0.04	0.777077
211400	2005	213405	葫芦岛市	0.04	2.63	0.836682	0.00242	0.04314	0.01	3006	85805	618453	79	0.03	0.122157	0.469813	0.127365	0.01	0.0230851	0.002686	0.033067	0.016889	0.000305	8579.37	221.68	0	1	1	0.0039	0.046	0.857937
211400	2006	213406	葫芦岛市	0	2.65	0.906329	0.00102	0.0475	0.01	3345	95000	641703	95	0.03	0.158715	0.324945	0.132338	0.04	0.0245851	0.000118	0.000277	0.005082	4e-07	9794.71	223.1	0	1	1	0.0075	0.053	0.979471
211400	2007	213407	葫芦岛市	0.01	2.68	0.782908	0.002551	0.06857	0.01	3470	110000	665935	105	0.04	0.143792	0.410572	0.134842	0	0.0265341	0.002248	0.004446	0.001316	0.001045	12009.1	221.98	0	1	1	0.0078	0.068	1.20091
211400	2008	213408	葫芦岛市	0.05	2.69	0.763644	0.005205	0.07735	0.01	3902	130000	691193	96	0.05	0.15394	0.445577	0.136784	0.01	0.0272246	0.005407	0.04348	0.048885	0.006359	13941.5	223.51	0	1	1	0.0067	0.088	1.39415
211400	2009	213409	葫芦岛市	0	2.71	1.01381	0.007447	0.07138	0.01	8229	136689	717525	138	0.06	0.207849	0.402863	0.144222	0.05	0.0283005	0	5e-05	5e-05	0.001542	15305.3	227.52	0	1	1	0.0083	0.1211	1.53053
211400	2010	213410	葫芦岛市	0.01	2.71	0.951473	0.022284	0.06775	0.01	8697	139643	744982	153	0.07	0.206026	0.510926	0.144654	0	0.0303807	5e-06	0.013774	0.013774	2.6e-05	17371.2	225.56	0	1	1	0.009	0.146	1.73712
211400	2011	213411	葫芦岛市	0	2.7	0.869658	0.044439	0.07492	0.01	9507	151626	773616	191	0.07	0.225816	0.478938	0.147987	0.01	0.0334898	0.0001	0.004865	0.00496	0.001003	20159	225	0	1	1	0.0108	0.1736	2.0159
211400	2012	213412	葫芦岛市	0.01	2.69	0.876913	0.053001	0.08045	0.01	10574	158678	803483	214	0.09	0.231875	0.503478	0.162263	0	0.0422757	0.000179	0.008451	0.040541	1.1e-05	22941.2	224.67	0	1	1	0.0183	0.1962	2.29412
211400	2013	213413	葫芦岛市	0	2.69	0.943742	0.0645	0.08402	0.01	11643	167531	834641	232	0.1	0.232952	0.489447	0.184305	0.01	0.0471459	0.0007	0.001727	0.001431	0.011	25304.2	225.88	0	1	1	0.0212	0.1934	2.53042
211400	2014	213414	葫芦岛市	0.02	2.7	1.11551	0.055804	0.087	0.01	12692	155766	867151	242	0.11	0.232	0.487455	0.179969	0	0.0447449	0.0001	0.016664	0.015873	3.4e-05	23009.9	228.37	0	1	1	0.0146	0.2455	2.30099
211400	2015	213415	葫芦岛市	0.01	2.69	1.18397	0.00168	0.08696	0.01	12110	149939	901077	200	0.13	0.230245	0.344578	0.16831	0.02	0.0393861	5.1e-05	0.009464	0.009434	0.000528	24767.9	228.88	0	1	1	0.0161	0.2124	2.47679
211400	2016	213416	葫芦岛市	0.05	2.69	1.43909	0.000322	0.19483	0.01	12042	169605	936488	203	0.15	0.288453	0.325141	0.180549	0.01	0.0413569	5e-05	0.046229	0.045737	0.000106	26338.2	230.49	0	1	1	0.019	0.206474	2.63382
211400	2017	213417	葫芦岛市	0.02	2.68	1.58632	0.003885	0.07737	0.01	12034	380245	973453	226	0.17	0.277026	0.366055	0.173902	0.05	0.0420126	6e-05	0.018196	0.018246	0.003843	27968.5	228.405	0	1	1	0.028	0.2245	2.79685
211400	2018	213418	葫芦岛市	0.01	2.68	1.61748	0.003371	0.07669	0.01	12033	166138	1000000	242	0.19	0.293008	0.345437	0.178658	0.02	0.0451633	0.001056	0.006567	0.007536	2.5e-05	29879.3	226.32	0	1	1	0.0317	0.245	2.98793
211400	2019	213419	葫芦岛市	0	2.68	1.83195	0.002895	0.09456	0	12032	159128	1100000	242	0.22	0.307781	0.339362	0.187052	0.01	0.0464112	0.000156	0.003247	0.00213	0.001273	32030.6	228.63	0	1	1	0.038	0.2851	3.20306
211400	2020	213420	葫芦岛市	0.01	2.68	1.90387	0.004912	0.10819	0.01	12032	168530	1100000	252	0.25	0.329534	0.273972	0.202231	0	0.043786	0.000162	0.007992	0.007624	0.00053	32755.7	228.61	0	1	1	0.0454	0.14504	3.27557
211400	2021	213421	葫芦岛市	0.01	2.68	1.74769	0.003434	0.12086	0.01	12032	177931	1100000	262	0.28	0.278705	0.273718	0.195665	0.01	0.0447695	0.000974	0.010895	1.9e-05	3e-05	34852.1	227.14	0	1	1	0.045	0.18	3.48521
211400	2022	213422	葫芦岛市	0	2.68	1.74636	0.004376	0.11722	0.01	12032	186528	1100000	266	0.33	0.260167	0.26081	0.198234	0.01	0.0455924	3e-05	0.000148	0.000158	0.000101	35524	225.95	0	1	1	0.0443	0.13684	3.5524
211400	2023	213423	葫芦岛市	0	2.68	1.72295	0.003713	0.11444	0.01	12032	190033	1200000	269	0.37	0.256087	0.29206	0.212702	0	0.0466596	7.9e-05	0.00051	0.000237	0.000353	37240	228.43	0	1	1	0.0371		3.724
220100	2003	222103	长春市	0.01	3.49	1.2179	0.075101	2.33558	0.09	10892	320427	946663	280	0.08	0.064147	0.535599	0.163588		0.0463359	0.003882	0.002363	0.001205	0.000124	7905	228.4	1	1	1	0.0788	0.1038	0.7905
220100	2004	222104	长春市	0.01	3.52	1.23115	0.090196	2.60009	0.09	11577	337709	1000000	349	0.09	0.065648	0.503052	0.16434	0.01	0.0477721	0.006224	6.2e-06	0.011831	0.000169	8901	228.56	1	1	1	0.0656	0.110078	0.8901
220100	2005	222105	长春市	0.02	3.56	1.09991	0.11706	2.91293	0.09	11813	383162	1100000	377	0.09	0.072481	0.501686	0.170692	0.01	0.0496945	1e-06	0.017149	0.010878	0.000252	10063.5	230.68	1	1	1	0.0747	0.121838	1.00635
220100	2006	222106	长春市	0.01	3.59	1.24069	0.140734	3.08605	0.09	10594	423968	1100000	563	0.09	0.084238	0.488092	0.174106	0.02	0.0514623	0.001256	0.004206	0.01154	0.008674	11358.6	231.48	1	1	1	0.077	0.136674	1.13586
220100	2007	222107	长春市	0	3.63	1.15218	0.168787	3.31019	0.09	11134	458177	1200000	622	0.1	0.08691	0.513843	0.17724	0.01	0.0553782	0	1e-05	0.0012	4.2e-05	12810.9	229.6	1	1	1	0.1047	0.158718	1.28109
220100	2008	222108	长春市	0.01	3.65	1.09755	0.203556	3.50327	0.09	11778	483045	1300000	662	0.12	0.09381	0.495282	0.183456	0	0.0596044	0	0.007531	0.007279	0.005934	15002.5	230.79	1	1	1	0.1209	0.18966	1.50025
220100	2009	222109	长春市	0.13	3.67	1.34076	0.063501	3.59423	0.09	9693	540000	1400000	514	0.13	0.107425	0.466169	0.193159	0.01	0.0639284	0.115699	0.018007	0.129875	0.00027	16072.1	232.63	1	1	1	0.1443	0.224647	1.60721
220100	2010	222110	长春市	0.15	3.68	1.369	0.069879	3.65734	0.09	10863	580000	1500000	567	0.15	0.115028	0.472266	0.202872	0.13	0.0705008	0.104968	0.047387	0.141096	1.1e-05	17921.9	232.13	1	1	1	0.1933	0.26376	1.79219
220100	2011	222111	长春市	0.09	3.7	1.288	0.077352	3.76533	0.09	13328	630889	1600000	669	0.16	0.129571	0.556471	0.212645	0.15	0.0794001	0.041758	0.04652	0.086213	0.00556	20487.3	232.22	1	1	1	0.2218	0.308417	2.04873
220100	2012	222112	长春市	0.04	3.67	1.28509	0.368236	3.87662	0.09	16227	678894	1600000	780	0.18	0.124648	0.613492	0.223259	0.09	0.0862873	0.018147	0.025336	0.472013	1e-05	22969.7	233.35	1	1	1	0.2783	0.362	2.29697
220100	2013	222113	长春市	0.05	3.65	1.28985	0.443995	4.01823	0.09	9574	718732	1800000	795	0.19	0.126513	0.603219	0.226763	0.04	0.0860575	0.006019	0.04233	0.045878	0.01	26033.9	232.58	1	1	1	0.3129	0.419167	2.60339
220100	2014	222114	长春市	0.06	3.66	1.39926	0.500293	4.14582	0.09	10544	654391	1900000	881	0.21	0.126504	0.5879	0.238283	0.05	0.0964663	0.018955	0.037858	0.051287	0.000152	23908	233.91	1	1	1	0.3624	0.490886	2.3908
220100	2015	222115	长春市	0.06	3.66	1.61575	0.52052	4.26081	0.09	10638	688551	2000000	1081	0.24	0.138467	0.506999	0.250686	0.06	0.0942326	0.02718	0.029056	0.054242	7e-05	25462	236.5	1	1	1	0.4561	0.568299	2.5462
220100	2016	222116	长春市	0.07	3.66	1.65738	0.649792	4.34366	0.09	10667	932332	2100000	1489	0.26	0.12872	0.539189	0.259941	0.06	0.0990586	0.053336	0.020397	0.072533	9e-05	27195	238.8	1	1	1	0.5717	0.665522	2.7195
220100	2017	222117	长春市	0.14	3.66	1.57147	0.338566	4.37812	0.09	10676	727000	2200000	1018	0.29	0.133069	0.513948	0.264176	0.07	0.104559	0.110864	0.033567	0.140588	0.000706	29044	240.22	1	1	1	0.7271	0.77813	2.9044
220100	2018	222118	长春市	0.07	3.66	1.59748	0.02734	4.47156	0.09	10679	741443	2400000	1040	0.32	0.124635	0.534486	0.279699	0.14	0.111817	0.049653	0.017948	0.064238	0.000186	31164	241.64	1	1	1	0.849	0.89428	3.1164
220100	2019	222119	长春市	0.11	3.66	2.21491	0.024168	4.68853	0.09	10680	751549	2500000	1077	0.35	0.151765	0.468757	0.285284	0.07	0.107297	0.058628	0.053531	0.104593	0.007565	33377	244.96	1	1	1	1.0554	1.0115	3.3377
220100	2020	222120	长春市	0.1	3.66	2.18826	0.026352	4.83034	0.09	10680	761655	2700000	1113	0.38	0.163323	0.406249	0.304475	0.11	0.115145	0.064196	0.032736	0.084962	0.012	34560	241.37	1	1	1	1.0474	0.722348	3.456
220100	2021	222121	长春市	0	3.66	2.28719	0.0248	4.9873	0.09	10680	771761	2900000	1150	0.42	0.136067	0.638488	0.313916	0.1	0.123378	6.3e-05	0.000131	0.00025	4e-05	37311	242.61	1	1	1	1.1404	1.0392	3.7311
220100	2022	222122	长春市	0.01	3.66	2.59439	0.025879	5.18336	0.09	10680	783311	3100000	1140	0.46	0.144799	0.470671	0.312331	0	0.11483	0.002537	0.007724	0.002692	5e-06	37128	242.7	1	1	1	1.1846	0.562633	3.7128
220100	2023	222123	长春市	0.01	3.66	2.62149	0.025117	5.36946	0.09	10680	1100000	3300000	1122	0.51	0.153523	0.53631	0.331825	0.01	0.124443	0.009384	0.004016	0.009859	0.003542		246.47	1	1	1	1.2346
220200	2003	222203	吉林市	0	1.59	0.710679	0.00602	0.43059	0.02	5298	135078	1000000	97	0.03	0.069412	0.401869	0.167646		0.0351837	2.1e-06	1.3e-06	0.003589	9.1e-05	7581	227.33	0	1	1	0.0138	0.07062	0.7581
220200	2004	222204	吉林市	0.03	1.58	0.578698	0.006641	0.48486	0.02	6013	157768	1100000	140	0.03	0.08198	0.342006	0.17323	0	0.0392678	0.024887	0.008706	0.000485	0.000216	8550	225.6	0	1	1	0.0126	0.075753	0.855
220200	2005	222205	吉林市	0	1.58	0.550875	0.007071	0.65908	0.02	5448	165112	1100000	185	0.03	0.107158	0.348809	0.17583	0.03	0.039327	0	3e-08	0.00892	0.012	9230.4	222.12	0	1	1	0.0097	0.081467	0.92304
220200	2006	222206	吉林市	0.01	1.59	0.562531	0.025182	0.62845	0.02	5706	289482	1100000	185	0.04	0.108601	0.349574	0.179699	0	0.0432456	3e-06	0.011541	1.5e-06	0.00267	10155.1	223.23	0	1	1	0.017	0.089386	1.01551
220200	2007	222207	吉林市	0	1.6	0.452412	0.028859	0.69431	0.02	6035	331011	1100000	247	0.04	0.097983	0.413502	0.177693	0.01	0.044061	0.001281	6.8e-05	0.001299	0.001252	12500.8	222.82	0	1	1	0.0199	0.102748	1.25008
220200	2008	222208	吉林市	0.02	1.62	0.37009	0.032118	0.76733	0.02	6820	216613	1100000	271	0.05	0.10451	0.392509	0.184278	0	0.0492682	0	0.014557	0.014557	0.000121	14000	224.51	0	1	1	0.0188	0.121587	1.4
220200	2009	222209	吉林市	0.19	1.61	0.413851	0.0372	0.88065	0.02	6489	228580	1100000	364	0.05	0.109791	0.370257	0.187321	0.02	0.0497958	0.172826	0.013978	0.185867	0.001386	15540.6	226.96	0	1	1	0.0205	0.146952	1.55406
220200	2010	222210	吉林市	0.48	1.6	0.397305	0.043756	0.8974	0.02	7913	230000	1200000	423	0.05	0.118724	0.342375	0.198189	0.19	0.0564455	0.456373	0.022678	0.478962	0.00011	16935.7	227.64	0	1	1	0.0242	0.17624	1.69357
220200	2011	222211	吉林市	0.37	1.6	0.377169	0.061309	0.93565	0.02	9181	253693	1200000	415	0.05	0.113932	0.40527	0.198919	0.48	0.0571254	0.31334	0.061391	0.37386	0.000713	19559.6	228.5	0	1	1	0.039	0.204246	1.95596
220200	2012	222212	吉林市	0.47	1.59	0.389611	0.070738	0.96286	0.02	10580	262476	1200000	337	0.05	0.117256	0.417734	0.209712	0.37	0.0657743	0.043207	0.428863	0.008462	2e-05	22067.6	229.33	0	1	1	0.0433	0.238968	2.20676
220200	2013	222213	吉林市	0.02	1.58	0.430637	0.081491	1.01143	0.02	8723	283733	1300000	366	0.05	0.125242	0.426988	0.214044	0.47	0.0656792	0.009561	0.01311	0.022344	0.019	25937.1	230.82	0	1	1	0.0476	0.276159	2.59371
220200	2014	222214	吉林市	0.03	1.54	0.574252	0.093602	1.03565	0.02	9298	257782	1300000	414	0.05	0.137559	0.400773	0.222852	0.02	0.0708107	0.00165	0.024303	0.025607	0.092	22437	231.28	0	1	1	0.068	0.324238	2.2437
220200	2015	222215	吉林市	0.02	1.54	0.709423	0.10483	1.04873	0.02	8955	261254	1300000	398	0.05	0.153095	0.362426	0.22928	0.03	0.0666126	0	0.023524	0.023413	0.0003	23918	232.48	0	1	1	0.0742	0.379812	2.3918
220200	2016	222216	吉林市	0.03	1.53	0.859388	0.115403	1.04018	0.02	9236	281000	1400000	419	0.05	0.154966	0.356539	0.242685	0.02	0.0700094	0.00292	0.024482	0.027272	0.00011	25520	236.38	0	1	1	0.0799	0.446543	2.552
220200	2017	222217	吉林市	0.1	1.53	0.936438	0.058159	1.02474	0.02	9004	270000	1500000	442	0.05	0.172059	0.261377	0.250738	0.03	0.0723729	0.006016	0.098239	0.10355	0.00021	27179	243.765	0	1	1	0.0662	0.50708	2.7179
220200	2018	222218	吉林市	0.02	1.52	0.950031	0.000915	1.04764	0.02	9194	276440	1500000	466	0.05	0.186379	0.253132	0.267262	0.1	0.0737157	0.008506	0.007592	0.015609	0.000304	28538	251.15	0	1	1	0.0787	0.59329	2.8538
220200	2019	222219	吉林市	0.12	1.52	1.55279	0.003612	1.12779	0.02	9037	260540	1600000	463	0.05	0.296825	0.232734	0.250192	0.02	0.0673223	0.094137	0.025135	0.118742	0.00053	30140	239.92	0	1	1	0.097	0.7345	3.014
220200	2020	222220	吉林市	0.05	1.52	1.654	0.003665	1.16377	0.02	9166	244640	1600000	459	0.05	0.306943	0.190617	0.249539	0.12	0.0604509	0.033207	0.013459	0.043606	0.003059	31027	236.17	0	1	1	0.1276	0.373	3.1027
220200	2021	222221	吉林市	0	1.52	1.60741	0.003715	1.21664	0.02	9060	228740	1700000	456	0.05	0.211444	0.289947	0.247571	0.05	0.0612231	0	1.9e-05	7.3e-05	5e-05	33479	236.75	0	1	1	0.1176	0.3785	3.3479
220200	2022	222222	吉林市	0	1.52	1.7046	0.003761	1.25424	0.02	9147	244192	1700000	457	0.05	0.261935	0.209722	0.248797	0	0.0605799	0.000286	8.8e-05	0.000192	0.0003	33269	234.65	0	1	1	0.1115	0.16807	3.3269
220200	2023	222223	吉林市	0.01	1.52	1.70132	0.003804	1.30469	0.02	9076	90077	1800000	627	0.05	0.259538	0.207472	0.254652	0	0.0628543	0.010437	0.000349	0.010573	0.000213		236.37	0	1	1	0.1167
220300	2003	222303	四平市	0	2.32	1.12355	0.000288	0.17436	0	2892	38981	540900	36	0.01	0.100829	0.354593	0.106874		0.0205548	0	0.001263	0.036182	1.5e-06	6709	189.36	0	1	1	0.0033	0.00466	0.6709
220300	2004	222304	四平市	0.01	2.33	0.931377	0.000298	0.19577	0	3105	44991	540900	49	0.01	0.09863	0.263423	0.105969	0	0.0217541	0.007844	0.006508	1.1e-05	6.2e-05	7778	187.48	0	1	1	0.0034	0.005219	0.7778
220300	2005	222305	四平市	0.01	2.36	0.739657	0.001799	0.18429	0	3368	49283	540900	87	0.01	0.100327	0.216796	0.113966	0.01	0.0219288	5e-05	0.010835	0.00842	0.004583	8641.3	195.83	0	1	1	0.0054	0.005511	0.86413
220300	2006	222306	四平市	0	2.35	0.74094	0.004844	0.22994	0	3283	49490	540900	144	0.01	0.108642	0.548829	0.123938	0.01	0.0232484	1e-06	1e-06	0.001288	0.005228	9899.97	194.49	0	1	1	0.0055	0.006051	0.989997
220300	2007	222307	四平市	0	2.38	0.595576	0.005189	0.21252	0	3536	38734	540901	140	0.01	0.109369	0.55423	0.124176	0	0.0238383	1e-07	0.0012	0.029153	6e-05	12329.1	196.14	0	1	1	0.0067	0.007114	1.23291
220300	2008	222308	四平市	0.02	2.4	0.521432	0.005465	0.27522	0	4108	109902	540904	166	0.02	0.119824	0.524789	0.132186	0	0.0275409	0	0.014965	0.014965	4.9e-05	13604.3	199.24	0	1	1	0.0066	0.008721	1.36043
220300	2009	222309	四平市	0.02	2.41	0.544883	0.00592	0.31093	0	4425	122050	540913	235	0.02	0.137815	0.235311	0.135503	0.02	0.0276792	0	0.020763	0.020763	2.3e-05	15100.4	204.53	0	1	1	0.0086	0.010422	1.51004
220300	2010	222310	四平市	0.01	2.42	0.467673	0.0067	0.53441	0	5191	127875	540936	202	0.02	0.145921	0.245312	0.141011	0.02	0.0339073	0	0.00834	0.00834	1.5e-06	16459	201.99	0	1	1	0.0101	0.01232	1.6459
220300	2011	222311	四平市	0.01	2.42	0.383003	0.007279	0.34193	0	5945	143440	541001	221	0.02	0.142005	0.278115	0.152395	0.01	0.0352948	0	0.0081	0.008089	3.3e-05	18482.9	201.55	0	1	1	0.011	0.014417	1.84829
220300	2012	222312	四平市	0.01	2.39	0.394299	0.008049	0.35106	0	6901	156913	541181	250	0.02	0.152882	0.329593	0.152959	0.01	0.0406108	0	0.008482	0.003063	3.6e-05	21387.3	202.69	0	1	1	0.0121	0.016869	2.13873
220300	2013	222313	四平市	0.01	2.33	0.450937	0.00887	0.3592	0	6072	168375	541677	268	0.03	0.147439	0.33934	0.157535	0.01	0.0409274	0	0.011616	0.011297	0.008347	25529.9	203.97	0	1	1	0.0129	0.019502	2.55299
220300	2014	222314	四平市	0.02	2.33	0.603575	0.009652	0.37323	0	6553	156150	543048	287	0.03	0.158135	0.30227	0.162227	0.01	0.0442	1e-06	0.016742	0.016695	0.001203	20894	204.53	0	1	1	0.0138	0.022847	2.0894
220300	2015	222315	四平市	0.01	2.27	0.755319	0.008385	0.38353	0	6889	159827	546854	283	0.03	0.179288	0.281697	0.159846	0.02	0.0418536	2e-06	0.009568	0.00955	0.02	22231	204.2	0	1	1	0.0155	0.02637	2.2231
220300	2016	222316	四平市	0.02	2.23	0.909828	0.008875	0.39028	0	7241	173000	557504	286	0.03	0.218856	0.24283	0.173246	0.01	0.0440399	0	0.019885	0.019779	0.000146	23707	209.2	0	1	1	0.0219	0.034354	2.3707
220300	2017	222317	四平市	0	2.21	1.00414	0.0096	0.38242	0	7612	161675	588001	338	0.03	0.284177	0.186428	0.180173	0.02	0.0431411	1.1e-05	0.002642	0.002444	0.0002	25295	218.495	0	1	1	0.0326	0.04144	2.5295
220300	2018	222318	四平市	0.01	2.18	1.00525	0.001417	0.38092	0	8002	164178	649565	321	0.03	0.307555	0.147419	0.201016	0	0.0469033	1e-05	0.010083	0.010068	0.000197	26509	227.79	0	1	1	0.036	0.04715	2.6509
220300	2019	222319	四平市	0.02	2.17	1.20125	0.001867	0.40208	0	8411	150572	684119	371	0.03	0.408313	0.156176	0.198222	0.01	0.0447046	0.00011	0.02171	0.020985	0.000835	28290	219.57	0	1	1	0.0348	0.055	2.829
220300	2020	222320	四平市	0.01	2.15	1.90078	0.002235	0.42892	0	8842	143717	658836	302	0.03	0.488228	0.131363	0.178699	0.02	0.0338551	0.000442	0.00814	0.00764	0.000942	29288	209.99	0	1	1	0.0409	0.0373	2.9288
220300	2021	222321	四平市	0	2.14	1.29992	0.002513	0.44304	0	9294	136862	633554	234	0.04	0.392964	0.179636	0.185675	0.01	0.0353663	0.00024	2.2e-05	0.0006	1.1e-05	31390	213.62	0	1	1	0.0378	0.1427	3.139
220300	2022	222322	四平市	0.02	2.13	1.30119	0.002713	0.45562	0	9770	166828	608271	262	0.04	0.373416	0.122462	0.18563	0	0.0358608	0.02028	0.000421	0.000311	0.000163	32491	210.79	0	1	1	0.0375	0.0723	3.2491
220300	2023	222323	四平市	0	2.12	1.3661	0.002853	0.48016	0	10270	139189	582988	235	0.04	0.40881	0.167443	0.190356	0.02	0.0367361	2.5e-05	0.000132	7.7e-05	8.1e-05		214.02	0	1	1	0.031
220400	2003	222403	辽源市	0	2.42	1.44968	0.00045	0.01229	0	1691	23188	295084	22	0	0.1469	0.272309	0.154523		0.0202496	0	9.7e-05	0.008424	2.3e-06	6293	218.73	0	1	1	0.0018	0.00353	0.6293
220400	2004	222404	辽源市	0	2.41	1.23474	0.000666	0.0053	0	1878	30078	295084	31	0	0.176374	0.176678	0.145804	0	0.0193085	0.000485	1e-07	3.2e-05	1.5e-06	7500	219.15	0	1	1	0.0008	0.00405	0.75
220400	2005	222405	辽源市	0.01	2.4	0.83467	0.000709	0.01125	0	1960	138000	295084	45	0	0.149324	0.192801	0.136864	0	0.0187636	0.0005	0.00842	5e-05	0.001005	8663.38	218.12	0	1	1	0.0028	0.00425	0.866338
220400	2006	222406	辽源市	0	2.4	0.739771	0.001217	0.00878	0	2118	38600	295084	48	0.01	0.129303	0.285947	0.138587	0.01	0.0211487	2.8e-06	0	0.003308	0.000172	9974.33	217.29	0	1	1	0.0022	0.004661	0.997433
220400	2007	222407	辽源市	0	2.4	0.661114	0.004754	0.02135	0	2331	45500	295084	55	0.01	0.14103	0.273911	0.142507	0	0.022921	0	0.001332	0.011357	0.006484	11692.7	218.24	0	1	1	0.0027	0.005647	1.16927
220400	2008	222408	辽源市	0.01	2.4	0.524672	0.01005	0.06075	0	2511	57400	295084	67	0.01	0.151082	0.284941	0.145756	0	0.0252757	0	0.009362	0.009348	0.000136	13645.5	220.63	0	1	1	0.0017	0.006949	1.36455
220400	2009	222409	辽源市	0	2.41	0.495693	0.010812	0.07874	0	1419	63145	295084	68	0.01	0.157614	0.272242	0.146872	0.01	0.0264827	0	0.004801	0.004801	0.000238	15247.8	221.69	0	1	1	0.0013	0.008497	1.52478
220400	2010	222410	辽源市	0	2.41	0.417563	0.0201	0.09021	0	1653	60000	295084	77	0.01	0.156103	0.266496	0.156165	0	0.0321123	0	1.3e-07	1.3e-07	0.009502	16665	221.96	0	1	1	0.0027	0.010051	1.6665
220400	2011	222411	辽源市	0.01	2.38	0.39393	0.015848	0.05412	0	1694	62049	295084	86	0.01	0.137516	0.274089	0.164669	0	0.0353946	0	0.014218	0.014208	0.000132	18757.4	221.24	0	1	1	0.0025	0.011766	1.87574
220400	2012	222412	辽源市	0	2.37	0.379278	0.01321	0.05567	0	1794	63928	295084	98	0.01	0.136589	0.28876	0.171817	0.01	0.0405654	0	0.003296	0.011958	0.002184	21251.8	222.25	0	1	1	0.0041	0.01377	2.12518
220400	2013	222413	辽源市	0	2.37	0.395427	0.025	0.06139	0	1779	69508	295087	102	0.01	0.133944	0.271938	0.177354	0	0.0423889	0	0.003121	0.003121	0.016	25378.8	223.26	0	1	1	0.0046	0.015938	2.53788
220400	2014	222414	辽源市	0.01	2.37	0.469505	0.026334	0.06086	0	1944	62410	295102	109	0.01	0.143914	0.269979	0.179003	0	0.0437484	0	0.010177	0.010177	0.002086	20780	223.46	0	1	1	0.0034	0.018657	2.078
220400	2015	222415	辽源市	0	2.35	0.486819	0.0295	0.05794	0	1869	62004	295214	117	0.02	0.152345	0.254	0.186178	0.01	0.0450449	0	4.8e-05	4.8e-05	0.000869	22297	224.81	0	1	1	0.0038	0.021607	2.2297
220400	2016	222416	辽源市	0	2.35	0.529391	0.032455	0.0578	0	1860	68000	296019	113	0.02	0.14447	0.218982	0.194697	0	0.0463255	0	0.000136	4.6e-05	0.000718	23725	226.37	0	1	1	0.0098	0.025282	2.3725
220400	2017	222417	辽源市	0	2.35	0.627345	0.036696	0.05248	0	1859	73000	301849	115	0.02	0.176907	0.149539	0.19203	0	0.0444735	0.00023	0.002523	0.002552	0.00022	25267	232.545	0	1	1	0.0072	0.03052	2.5267
220400	2018	222418	辽源市	0.01	2.34	0.713279	0.000207	0.05749	0	1859	64617	324735	120	0.02	0.195025	0.147132	0.206419	0	0.0460669	6.6e-05	0.00755	0.00743	6.1e-05	26328	238.72	0	1	1	0.0085	0.0346	2.6328
220400	2019	222419	辽源市	0	2.34	1.0686	0.000326	0.07128	0	1859	61764	341699	128	0.02	0.324644	0.131171	0.231945	0.01	0.045818	6e-05	0.000312	0.00016	0.000212	28224	250.26	0	1	1	0.01	0.0392	2.8224
220400	2020	222420	辽源市	0	2.34	1.07306	0.000344	0.08469	0	1859	58910	330040	121	0.02	0.320875	0.123455	0.236129	0	0.0429823	0.000178	0.000198	0.000191	0.000185	29191	247.6	0	1	1	0.0122	0.0288	2.9191
220400	2021	222421	辽源市	0	2.34	1.07386	0.000353	0.09084	0	1859	56057	318381	114	0.02	0.220371	0.185473	0.238225	0	0.0441753	9.2e-05	1.1e-05	0.00034	0.000227	31294	248.25	0	1	1	0.0113	0.0624	3.1294
220400	2022	222422	辽源市	0	2.34	1.07748	0.000357	0.09368	0	1859	59917	306722	129	0.02	0.246193	0.139131	0.23901	0	0.0459828	8.6e-05	5e-07	5e-07	0.001421	31858	245.41	0	1	1	0.013	0.0499	3.1858
220400	2023	222423	辽源市	0	2.34	1.11579	0.000359	0.10808	0	1859	70056	295063	119	0.02	0.261484	0.143678	0.246723	0	0.0480994	0.000239	3.1e-05	0.000107	0.000163		247.37	0	1	1	0.0149
220500	2003	222503	通化市	0	1.49	0.950998	0.00115	0.05697	0	4119	61794	448060	58	0.01	0.112104	0.322116	0.132739		0.024483	8.8e-07	0	0.003	0.000128	7056	216.56	0	1	1	0.0034	0.01199	0.7056
220500	2004	222504	通化市	0	1.49	0.838396	0.001138	0.08427	0	4395	80010	448060	60	0.01	0.122477	0.297173	0.139539	0	0.0262863	0	1.1e-05	0.00241	5e-07	7855	216.92	0	1	1	0.0038	0.013827	0.7855
220500	2005	222505	通化市	0.01	1.49	0.708005	0.0019	0.09374	0	4655	83559	448060	62	0.01	0.141436	0.27864	0.134563	0	0.0254738	0	0.01042	0.04435	0.000438	8807.48	218.2	0	1	1	0.006	0.015772	0.880748
220500	2006	222506	通化市	0	1.49	0.68344	0.003354	0.0862	0	4766	83600	448060	93	0.02	0.146412	0.319437	0.135984	0.01	0.0264397	0.001281	7.7e-06	0.035782	0.000907	10154.4	221.84	0	1	1	0.0055	0.017743	1.01544
220500	2007	222507	通化市	0.03	1.49	0.675798	0.003338	0.08552	0	4897	100815	448060	110	0.02	0.124393	0.367859	0.137486	0	0.027225	0.013015	0.01984	0.004786	0.002803	12287.9	221.21	0	1	1	0.0035	0.020256	1.22879
220500	2008	222508	通化市	0.01	1.5	0.547498	0.00868	0.09554	0	5393	98198	448060	117	0.02	0.156226	0.306579	0.142739	0.03	0.0295949	0	0.012514	0.012512	0.001658	13944.7	223.36	0	1	1	0.0058	0.026531	1.39447
220500	2009	222509	通化市	0.02	1.49	0.594179	0.013978	0.10637	0	2818	101868	448060	147	0.03	0.180265	0.278501	0.152732	0.01	0.0325988	1e-06	0.01707	0.017071	3.7e-05	15252.8	225.54	0	1	1	0.0053	0.032896	1.52528
220500	2010	222510	通化市	0.02	1.45	0.544866	0.01795	0.10783	0	3111	111400	448060	191	0.03	0.191211	0.283752	0.175569	0.02	0.040866	7.7e-06	0.017122	0.017125	0.011	16703.8	226.12	0	1	1	0.0046	0.04002	1.67038
220500	2011	222511	通化市	0.02	1.45	0.496143	0.025151	0.11319	0	3469	117952	448061	207	0.03	0.180243	0.342275	0.182383	0.02	0.0444628	3e-06	0.018689	0.018692	0.000656	18903.8	226.51	0	1	1	0.0104	0.04653	1.89038
220500	2012	222512	通化市	0.01	1.44	0.471816	0.029287	0.11863	0	3489	119452	448070	162	0.03	0.199912	0.365779	0.190437	0.02	0.0501304	0.001812	0.010187	0.00329	1.5e-05	21627.3	226.25	0	1	1	0.0134	0.05469	2.16273
220500	2013	222513	通化市	0.01	1.42	0.497253	0.034006	0.12086	0	3729	128871	448115	169	0.04	0.199952	0.368797	0.195864	0.01	0.0533085	4.8e-05	0.012388	0.012436	0.004157	25635.6	226.03	0	1	1	0.0129	0.063095	2.56356
220500	2014	222514	通化市	0	1.42	0.575526	0.008113	0.12418	0	2963	116485	448356	193	0.04	0.206941	0.401147	0.201509	0.01	0.0550291	3e-06	6.8e-05	3e-05	0.021	20857	228.53	0	1	1	0.0084	0.073954	2.0857
220500	2015	222515	通化市	0.01	1.42	0.660887	0.043085	0.12598	0	3152	120237	449654	185	0.04	0.229982	0.339295	0.211548	0	0.0575845	3e-06	0.008422	0.005225	0.000195	22380	229.4	0	1	1	0.0095	0.08629	2.238
220500	2016	222516	通化市	0.03	1.41	0.733474	0.046939	0.12858	0	3175	128000	456689	188	0.05	0.273185	0.319781	0.219088	0.01	0.0598741	4e-05	0.032764	0.032694	8.9e-05	23929	233.48	0	1	1	0.0112	0.100985	2.3929
220500	2017	222517	通化市	0.01	1.42	0.88194	0.051216	0.12985	0	3178	132000	496407	204	0.05	0.286547	0.243073	0.218047	0.03	0.0582787	3.5e-06	0.008938	0.008721	3e-05	25460	238.345	0	1	1	0.0089	0.12131	2.546
220500	2018	222518	通化市	0.01	1.41	1.02197	0.00885	0.12801	0	3178	123940	561751	211	0.05	0.299768	0.222252	0.226863	0.01	0.0544331	0.000116	0.009484	0.009296	3.8e-05	26886	243.21	0	1	1	0.014	0.14508	2.6886
220500	2019	222519	通化市	0.01	1.42	1.22604	0.01242	0.12854	0	3178	122137	558095	222	0.06	0.368178	0.199411	0.234246	0.01	0.0536429	0.001383	0.008268	0.009367	0.000284	28394	246.73	0	1	1	0.0176	0.1727	2.8394
220500	2020	222520	通化市	0.01	1.42	1.26961	0.012234	0.13035	0	3178	120335	541175	217	0.06	0.379697	0.188189	0.238718	0.01	0.0524396	8.3e-05	0.005806	0.001725	0.004163	29397	243.17	0	1	1	0.026	0.1004	2.9397
220500	2021	222521	通化市	0	1.42	1.79122	0.012242	0.14038	0	3178	118532	524254	212	0.07	0.418312	0.252816	0.224827	0.01	0.0470306	3e-05	0.00061	0.01493	0.00469	31581	246.2	0	1	1	0.0254	0.087	3.1581
220500	2022	222522	通化市	0	1.42	1.83003	0.012242	0.16191	0	3178	129824	507334	211	0.07	0.444234	0.16861	0.225072	0	0.0455204	0	0.001173	0.001173	6.8e-05	33446	244.7	0	1	1	0.0187	0.056321	3.3446
220500	2023	222523	通化市	0	1.42	1.4504	0.012242	0.15372	0	3178	118532	490414	212	0.08	0.32827	0.192602	0.233339	0	0.0465252	0.000111	0.000115	0.00017	5.7e-05		246.11	0	1	1	0.0241
220600	2003	222603	白山市	0.01	0.76	0.961899	0.000585	0	0	2693	38147	332310	30	0.01	0.12988	0.273044	0.16274		0.0258373	3e-07	0.005663	0.001084	1e-06	6542	210.04	0	1	1	0.0011	0.00996	0.6542
220600	2004	222604	白山市	0	0.75	1.09753	0.000817	0.00137	0	2379	45103	332262	35	0.01	0.209746	0.203021	0.172053	0.01	0.0268232	1e-05	2.2e-05	0.000485	2.2e-05	7265	211.74	0	1	1	0.0019	0.01338	0.7265
220600	2005	222605	白山市	0	0.75	0.62935	0.001235	0.00274	0	2391	52028	332196	52	0.01	0.181847	0.184682	0.173225	0	0.0284033	0	5e-05	0.0193	3.8e-05	8672.1	215.26	0	1	1	0.0014	0.014989	0.86721
220600	2006	222606	白山市	0	0.74	0.703594	0.002404	0.00411	0	2237	45296	332105	66	0.01	0.180431	0.225463	0.178834	0	0.0308587	0	2e-06	0.007696	0.002688	9774.03	216.04	0	1	1	0.0025	0.016627	0.977403
220600	2007	222607	白山市	0.01	0.74	0.719676	0.007263	0.00548	0	2708	50169	331978	77	0.01	0.176606	0.26152	0.182233	0	0.0329281	1e-05	0.011709	0.013093	0.000378	11540.1	216.73	0	1	1	0.0013	0.019	1.15401
220600	2008	222608	白山市	0.01	0.74	0.608032	0.009386	0.00685	0	2819	56175	331803	73	0.01	0.194287	0.267108	0.184757	0.01	0.034817	3e-07	0.010494	0.010494	0.000181	13523	219.25	0	1	1	0.0016	0.023609	1.3523
220600	2009	222609	白山市	0.03	0.74	0.610839	0.00611	0.03574	0	1877	60237	331560	89	0.01	0.21435	0.258709	0.195654	0.01	0.0387123	2e-06	0.027993	0.027995	3.1e-05	15035.3	220.85	0	1	1	0.0019	0.029342	1.50353
220600	2010	222610	白山市	0.02	0.74	0.562356	0.013477	0.03621	0	2122	60000	331225	83	0.01	0.231037	0.252512	0.198021	0.03	0.0434391	0	0.016548	0.016545	0.001566	16356	218.57	0	1	1	0.003	0.03496	1.6356
220600	2011	222611	白山市	0.01	0.74	0.516613	0.015358	0.01587	0	2182	69476	330763	89	0.01	0.23969	0.278937	0.195963	0.02	0.0440161	0	0.009301	0.0093	0.001345	18482.9	221.07	0	1	1	0.0032	0.041111	1.84829
220600	2012	222612	白山市	0	0.73	0.470749	0.008373	0.012	0	2397	69952	330124	97	0.01	0.217867	0.311439	0.204027	0.01	0.0508386	0.00029	0.003002	0.003865	0.000205	21282	221.93	0	1	1	0.0034	0.04835	2.1282
220600	2013	222613	白山市	0.01	0.73	0.532438	0.020935	0.00934	0	2379	76758	329242	105	0.01	0.203604	0.337701	0.207248	0	0.051209	0.00392	0.003181	0.007081	0.019	25554.5	221.99	0	1	1	0.0051	0.056122	2.55545
220600	2014	222614	白山市	0	0.72	0.583585	0.02397	0.0115	0	1677	68541	328025	114	0.01	0.20458	0.320312	0.212453	0.01	0.0542323	0	0.000365	0.000365	0.006946	18288	222.18	0	1	1	0.004	0.065859	1.8288
220600	2015	222615	白山市	0.01	0.71	0.640254	0.02684	0.01516	0	2185	70591	326350	112	0.01	0.235655	0.284336	0.223331	0	0.0532803	0	0.010479	0.010479	0.002042	19879	223.63	0	1	1	0.0058	0.076917	1.9879
220600	2016	222616	白山市	0	0.71	0.598645	0.02986	0.01713	0	2248	76000	324046	112	0.01	0.256676	0.262995	0.238526	0.01	0.0570832	0.000273	0.000819	0.000947	0.000198	21270	227.73	0	1	1	0.0075	0.089875	2.127
220600	2017	222617	白山市	0.02	0.71	0.63446	0.014938	0.01391	0	2255	80000	320885	118	0.01	0.274361	0.144634	0.242148	0	0.0564639	0.0001	0.017078	0.017148	0.000306	22674	232.78	0	1	1	0.006	0.10639	2.2674
220600	2018	222618	白山市	0	0.71	0.732713	1.7e-05	0.01214	0	2255	72036	317211	125	0.01	0.289516	0.118616	0.256883	0.02	0.0591587	0.000285	0.003722	0.00381	0.00155	23694	237.83	0	1	1	0.0075	0.11917	2.3694
220600	2019	222619	白山市	0	0.71	0.99943	2e-06	0.02428	0	2256	62228	322134	125	0.01	0.39416	0.118379	0.277149	0	0.058644	0.000211	0.002835	0.000969	0.002076	25648	249.93	0	1	1	0.007	0.1242	2.5648
220600	2020	222620	白山市	0	0.71	1.08652	1e-06	0.03657	0	2256	52421	339151	125	0.01	0.398827	0.115459	0.286062	0	0.0562982	0.000111	0.00203	0.001396	0.000745	26736	248.12	0	1	1	0.0105	0.0476	2.6736
220600	2021	222621	白山市	0	0.71	1.09893	0	0.04644	0	2256	42613	356168	125	0.01	0.270181	0.174621	0.290015	0	0.0588095	0	5e-05	0.000516	0.000155	28465	247.41	0	1	1	0.0134	0.0447	2.8465
220600	2022	222622	白山市	0	0.71	1.14098	0	0.04743	0	2256	66314	373185	125	0.01	0.308501	0.146005	0.286718	0	0.0589029	0.00011	0.000181	0.00019	5e-06	28503	244.02	0	1	1	0.012	0.0356	2.8503
220600	2023	222623	白山市	0	0.71	1.24781	0	0.04651	0	2256	42613	390202	125	0.01	0.319639	0.161097	0.293509	0	0.0603378	0.00011	8.5e-05	7.8e-05	0.000117		246.87	0	1	1	0.0109
220700	2003	222703	松原市	0	1.32	0.84872	0.001252	0	0	1334	40999	258196	59	0.01	0.083526	0.426869	0.084585		0.0138052	5.8e-05	0.00271	0.000112	0.001834	6568	189.28	0	1	1	0.0017	0.00486	0.6568
220700	2004	222704	松原市	0	1.33	0.632488	0.001028	0.00408	0	1432	57425	271269	76	0.01	0.082134	0.346333	0.083486	0	0.0147767	1e-06	0.002414	5.3e-05	0.007356	7793	191.54	0	1	1	0.0036	0.006049	0.7793
220700	2005	222705	松原市	0.06	1.32	0.467252	0.006858	0.00815	0	1421	62989	285119	85	0.01	0.093279	0.327828	0.085761	0	0.0157412	0.022411	0.032588	9e-07	0.000228	8925	195.15	0	1	1	0.0034	0.00754	0.8925
220700	2006	222706	松原市	0	1.32	0.393398	0.006858	0.01222	0	1800	77174	299800	148	0.01	0.097983	0.367834	0.087446	0.06	0.0179707	0	0.003308	0.001206	8.5e-05	10071.3	198.48	0	1	1	0.0043	0.009395	1.00713
220700	2007	222707	松原市	0.01	1.33	0.341555	0.007502	0.0163	0	2320	98925	315368	171	0.02	0.090921	0.380506	0.095269	0	0.0195281	1.6e-06	0.00503	6.4e-05	5.2e-05	12460.6	205.53	0	1	1	0.0036	0.011326	1.24606
220700	2008	222708	松原市	0.03	1.35	0.256401	0.009102	0.04678	0	3082	108430	331884	206	0.02	0.092427	0.385448	0.103646	0.01	0.0235837	0	0.025881	0.025854	0.000255	13954	207.16	0	1	1	0.0015	0.016078	1.3954
220700	2009	222709	松原市	0.02	1.37	0.266903	0.010789	0.03033	0	2950	99618	349412	274	0.02	0.103244	0.277713	0.115576	0.03	0.0249176	0	0.016583	0.01655	0.000264	15276.8	213.64	0	1	1	0.0038	0.02036	1.52768
220700	2010	222710	松原市	0.01	1.38	0.255682	0.01268	0.02977	0	4212	110000	368022	257	0.02	0.094559	0.296996	0.131243	0.02	0.0342013	0	0.007525	0.007218	8.8e-05	16800	212.85	0	1	1	0.006	0.02441	1.68
220700	2011	222711	松原市	0.02	1.39	0.222695	0.017805	0.03463	0	4967	121976	387790	358	0.02	0.089843	0.349008	0.140445	0.01	0.0366281	0	0.016258	0.016205	0.002724	19227	215.87	0	1	1	0.0064	0.029038	1.9227
220700	2012	222712	松原市	0	1.37	0.226896	0.024052	0.03483	0	5801	127855	408797	210	0.02	0.088815	0.406782	0.154091	0.02	0.043097	5e-05	0.003815	0.000275	0.000204	21703.5	218.63	0	1	1	0.0088	0.03431	2.17035
220700	2013	222713	松原市	0.01	1.34	0.301989	0.02768	0.03291	0	7350	142208	431130	224	0.02	0.097006	0.38724	0.159294	0	0.0439497	1e-06	0.009443	0.009393	0.012	25933.4	219.39	0	1	1	0.0046	0.039793	2.59334
220700	2014	222714	松原市	0.02	1.32	0.376336	0.031285	0.0295	0	8096	130671	454884	241	0.02	0.107662	0.363707	0.164469	0.01	0.0469561	1.5e-05	0.016166	0.015627	0.037	20810	219.88	0	1	1	0.0082	0.046606	2.081
220700	2015	222715	松原市	0.01	1.32	0.494113	0.035108	0.0289	0	9378	135536	480159	263	0.02	0.111724	0.274473	0.172399	0.02	0.0478521	5e-05	0.011312	0.010835	0.00014	22392	220.11	0	1	1	0.011	0.054165	2.2392
220700	2016	222716	松原市	0.04	1.31	0.564014	0.038557	0.02772	0	10822	141038	507066	328	0.02	0.135317	0.226879	0.182918	0.01	0.0500224	0.0001	0.04118	0.040562	0.017	23947	224.54	0	1	1	0.0154	0.063237	2.3947
220700	2017	222717	松原市	0	1.3	0.629453	0.041701	0.0294	0	12443	139826	535722	304	0.02	0.180455	0.175351	0.190012	0.04	0.0487799	5e-05	0.002278	0.002022	0.000236	25480	234.6	0	1	1	0.0154	0.07312	2.548
220700	2018	222718	松原市	0	1.3	0.643654	0.002365	0.03278	0	14255	133908	575695	311	0.02	0.194867	0.168359	0.212885	0	0.0519852	7e-06	0.004249	0.004195	0.019	26703	244.66	0	1	1	0.0154	0.08128	2.6703
220700	2019	222719	松原市	0	1.29	1.23936	0.002379	0.0434	0	16273	127023	598786	287	0.02	0.36942	0.177545	0.209668	0	0.0482243	0.000202	0.004114	0.004105	0.000211	28423	226.53	0	1	1	0.0334	0.1078	2.8423
220700	2020	222720	松原市	0.03	1.29	1.21942	0.002391	0.05164	0	18515	128112	626784	281	0.02	0.394954	0.256221	0.206381	0	0.0432281	0.00018	0.028097	0.027831	0.000446	29542	222.26	0	1	1	0.0401	0.065144	2.9542
220700	2021	222721	松原市	0	1.29	1.16103	0.002402	0.05989	0	20995	129200	654782	275	0.02	0.295235	0.21275	0.207182	0.03	0.0436457	0	1.1e-05	5e-07	1e-08	31819	223.69	0	1	1	0.0306	0.0832	3.1819
220700	2022	222722	松原市	0	1.28	1.1951	0.002411	0.0574	0	23730	129981	682779	284	0.02	0.31028	0.152183	0.201266	0	0.0442257	0	1.1e-05	6e-06	5.8e-05	33624	217.12	0	1	1	0.0238	0.0964	3.3624
220700	2023	222723	松原市	0	1.28	1.28585	0.00242	0.07053	0	26737	129916	710777	288	0.02	0.348182	0.148299	0.208922	0	0.0464467	7e-05	0.000132	5.8e-05	0.000144		219.17	0	1	1	0.0273
220800	2003	222803	白城市	0	0.78	1.06754	3.4e-05	0.03521	0	1227	65880	177536	36	0	0.162464	0.27175	0.144484		0.0197506	2.3e-05	0.001181	0.002241	8.6e-05	6424	195.25	0	1	1	0.0024	0.00509	0.6424
220800	2004	222804	白城市	0	0.78	0.963272	0.000101	0.02542	0	1330	47048	189391	47	0	0.184584	0.162337	0.151485	0	0.0208097	0.000485	0	0.000392	0.000834	7396	201.11	0	1	1	0.0014	0.006089	0.7396
220800	2005	222805	白城市	0.02	0.78	0.830746	0.000613	0.02982	0	1446	70386	202048	56	0	0.207188	0.162507	0.157825	0	0.0211005	0.002338	0.018248	1.2e-05	2.2e-05	8447.09	203.45	0	1	1	0.0015	0.006613	0.844709
220800	2006	222806	白城市	0.04	0.79	0.685681	0.000963	0.04536	0	969	75014	215563	65	0	0.197984	0.179235	0.158761	0.02	0.0221484	0.013784	0.02758	0.008916	7.5e-05	9603.32	210.86	0	1	1	0.0015	0.007075	0.960332
220800	2007	222807	白城市	0.02	0.79	0.629896	0.001895	0.05245	0	1130	56680	229995	118	0	0.204026	0.179254	0.160288	0.04	0.0232143	0.000195	0.017886	0.007067	1.8e-06	11534.9	213.66	0	1	1	0.0017	0.008481	1.15349
220800	2008	222808	白城市	0.03	0.79	0.617094	0.002651	0.05513	0	1304	65106	245405	154	0	0.208066	0.180305	0.142969	0.02	0.0240502	0.015621	0.009618	0.022862	3.6e-05	13519.8	215.75	0	1	1	0.0037	0.010286	1.35198
220800	2009	222809	白城市	0.01	0.79	0.550904	0.006502	0.06561	0	1568	71516	261861	190	0.01	0.229457	0.155826	0.138823	0.03	0.023416	0	0.012081	0.01208	0.000262	15005.8	217.45	0	1	1	0.0023	0.012497	1.50058
220800	2010	222810	白城市	0.02	0.79	0.432596	0.00775	0.17466	0	1873	80000	279437	116	0.01	0.207038	0.195435	0.152307	0.01	0.0315168	0	0.017493	0.017493	0.001191	15904.2	216.26	0	1	1	0.0025	0.01492	1.59042
220800	2011	222811	白城市	0.01	0.79	0.396329	0.008741	0.18617	0	1839	85979	298207	132	0.01	0.207454	0.213584	0.14937	0.02	0.032539	0	0.00612	0.00612	0.000615	17813.6	213.9	0	1	1	0.0052	0.017365	1.78136
220800	2012	222812	白城市	0	0.78	0.463962	0.01017	0.19051	0	2008	91792	318255	150	0.01	0.231856	0.217428	0.157427	0.01	0.0378599	5e-05	0.000492	0.003212	0.000326	20154.3	215.78	0	1	1	0.0065	0.02032	2.01543
220800	2013	222813	白城市	0	0.77	0.546317	0.012484	0.19213	0	1503	104964	339670	162	0.01	0.225374	0.236872	0.162334	0	0.0384143	0	0.000114	1.3e-05	0.015	24290.6	218.23	0	1	1	0.0068	0.023471	2.42906
220800	2014	222814	白城市	0.01	0.77	0.647494	0.014209	0.19651	0	1418	95685	362544	175	0.01	0.266577	0.226302	0.168474	0	0.0410243	0	0.009416	0.009382	0.002221	18150	219.11	0	1	1	0.0059	0.027468	1.815
220800	2015	222815	白城市	0	0.76	0.8661	0.015907	0.198	0	1437	100400	386980	176	0.01	0.290206	0.197885	0.172984	0.01	0.0406757	0	0.001172	0.001102	0.014	19820	219.69	0	1	1	0.0087	0.031791	1.982
220800	2016	222816	白城市	0.01	0.76	1.00899	0.017512	0.2013	0	1449	110000	413084	178	0.01	0.317751	0.188969	0.180107	0	0.0422367	4.4e-06	0.007416	0.007331	0.002149	21090	223.06	0	1	1	0.0109	0.03698	2.109
220800	2017	222817	白城市	0.01	0.76	1.22967	0.192363	0.20119	0	1456	120000	440973	193	0.01	0.392383	0.161913	0.183688	0.01	0.0429512	0	0.007825	0.007589	0.000554	22461	225.22	0	1	1	0.0134	0.04284	2.2461
220800	2018	222818	白城市	0.01	0.76	1.23247	0.001	0.20613	0	1460	106121	475436	204	0.01	0.446581	0.151702	0.192663	0.01	0.0436616	0.00011	0.00867	0.008742	0.000707	23539	227.38	0	1	1	0.0124	0.04867	2.3539
220800	2019	222819	白城市	0.01	0.76	1.49791	0.000124	0.23852	0	1463	97367	496789	224	0.01	0.508104	0.175958	0.219171	0.01	0.0446127	9e-05	0.012457	0.012128	0.000419	25631	231.91	0	1	1	0.0207	0.053	2.5631
220800	2020	222820	白城市	0.01	0.76	1.38799	0.00017	0.0285	0	1464	97195	536217	210	0.01	0.549664	0.145511	0.214873	0.01	0.042404	1e-05	0.008993	0.007447	0.001556	26668	225.84	0	1	1	0.0233	0.0154	2.6668
220800	2021	222821	白城市	0	0.76	1.37559	0.000221	0.28055	0	1465	97023	575644	197	0.01	0.407532	0.175868	0.21857	0.01	0.0437964	0.000145	0.000422	0.000109	0.000346	28428	226.87	0	1	1	0.0254	0.0733	2.8428
220800	2022	222822	白城市	0	0.76	1.37285	0.000275	0.30441	0	1466	102300	615072	208	0.01	0.424211	0.108758	0.217163	0	0.0447077	0	0.000473	0.000173	0.0001	29109	221.66	0	1	1	0.0319	0.0461	2.9109
220800	2023	222823	白城市	0	0.76	1.4798	0.000329	0.03707	0	1466	105518	654500	220	0.01	0.487939	0.098728	0.225527	0	0.0466529	2.3e-06	2.8e-05	1.8e-05	1.3e-05		224.68	0	1	1	0.024
230100	2003	232103	哈尔滨市	0.04	1.8	1.35672	0.022603	2.57136	0.1	9518	470958	845562	289	0.06	0.085922	0.628155	0.172745		0.0444607	0.020773	0.019507	0.002413	0.002228	7907	230.52	1	1	1	0.0644	0.1345	0.7907
230100	2004	232104	哈尔滨市	0	1.83	1.25764	0.0405	3.03505	0.1	9940	748104	895755	310	0.07	0.089473	0.635812	0.173286	0.04	0.0479059	0	0.000784	0.000485	0.000659	8940.3	227.94	1	1	1	0.0876	0.1515	0.89403
230100	2005	232105	哈尔滨市	0	1.84	1.07301	0.036604	3.58111	0.1	9830	517687	950397	325	0.09	0.089907	0.595713	0.179373	0	0.0479409	2.6e-07	1.1e-05	0.004289	2.7e-05	10064.8	230.92	1	1	1	0.1072	0.1801	1.00648
230100	2006	232106	哈尔滨市	0	1.85	1.04579	0.03172	3.83372	0.1	10641	615973	1000000	442	0.09	0.092969	0.607618	0.182789	0	0.0520461	0	0.001695	0.000155	0.000871	11230.9	232.35	1	1	1	0.1187	0.2167	1.12309
230100	2007	232107	哈尔滨市	0.01	1.86	0.978519	0.0372	3.84888	0.1	10772	681028	1100000	460	0.1	0.095364	0.56824	0.186072	0	0.0537031	0.003421	0.003759	0.014384	0.000927	12772	233.42	1	1	1	0.1473	0.2491	1.2772
230100	2008	232108	哈尔滨市	0.01	1.87	0.919316	0.057341	4.49975	0.1	11715	707900	1100000	577	0.14	0.10504	0.544372	0.190806	0.01	0.0598901	0	0.006871	0.006269	0.004429	14588.6	234.21	1	1	1	0.2013	0.29901	1.45886
230100	2009	232109	哈尔滨市	0.08	1.87	1.08117	0.060492	4.68903	0.1	9350	739348	1200000	844	0.15	0.109718	0.554973	0.202071	0.01	0.0615775	0.02287	0.052176	0.074677	0.006083	15887	237.73	1	1	1	0.2329	0.3749	1.5887
230100	2010	232110	哈尔滨市	0.08	1.87	1.12609	0.07001	4.81589	0.1	10129	804960	1300000	965	0.16	0.123599	0.525736	0.212166	0.08	0.0706074	0.009577	0.073407	0.079798	0.000776	17556.8	238.7	1	1	1	0.2812	0.4124	1.75568
230100	2011	232111	哈尔滨市	0.07	1.87	1.14876	0.079404	4.81511	0.1	11431	953702	1400000	851	0.18	0.131332	0.53904	0.215332	0.08	0.0726926	0.005899	0.062237	0.064458	0.008683	20030.6	239.09	1	1	1	0.3704	0.4358	2.00306
230100	2012	232112	哈尔滨市	0.05	1.87	1.22148	0.190001	4.82211	0.1	11764	958226	1500000	995	0.2	0.141438	0.551164	0.225306	0.07	0.0812687	0.016939	0.028042	0.038673	0.013	22477	240.7	1	1	1	0.5457	0.5052	2.2477
230100	2013	232113	哈尔滨市	0.46	1.88	1.25092	0.226242	4.92382	0.1	11138	1100000	1600000	1124	0.22	0.141474	0.566767	0.23837	0.05	0.0835391	0.298406	0.161756	0.278116	0.012	25196.7	240.84	1	1	1	0.6643	0.4494	2.51967
230100	2014	232114	哈尔滨市	0.26	1.86	1.35906	0.272125	5.06425	0.1	10169	961068	1700000	1251	0.24	0.13859	0.572264	0.248411	0.46	0.0910147	0.182385	0.080124	0.170239	0.004289	28815.9	242.13	1	1	1	0.747	0.53928	2.88159
230100	2015	232115	哈尔滨市	0.08	1.81	1.47661	0.299426	6.63749	0.1	10744	896363	1900000	1289	0.26	0.143421	0.494315	0.264928	0.26	0.0955122	0.044929	0.029618	0.054521	0.000555	30978	243.23	1	1	1	0.882	0.64962	3.0978
230100	2016	232116	哈尔滨市	0.06	1.8	1.48301	0.32073	6.3624	0.1	10718	937465	2000000	1222	0.29	0.143617	0.429352	0.270986	0.08	0.098094	0.042979	0.015553	0.041769	0.002561	33190	245.26	1	1	1	0.8127	0.70401	3.319
230100	2017	232117	哈尔滨市	0.13	1.79	1.59309	0.344218	5.08884	0.1	10719	901626	2200000	1223	0.32	0.153179	0.384056	0.273882	0.06	0.0987592	0.099677	0.028151	0.076267	0.004717	35546	250.385	1	1	1	0.7469	0.768889	3.5546
230100	2018	232118	哈尔滨市	0.08	1.78	1.73339	0.365309	5.04194	0.1	10719	880273	2400000	1204	0.35	0.152713	0.399481	0.294173	0.13	0.104804	0.031498	0.050607	0.062808	0.004166	37828	255.51	1	1	1	0.8558	0.85437	3.7828
230100	2019	232119	哈尔滨市	0.08	1.77	2.29625	0.385516	5.81859	0.1	10719	792206	2500000	1285	0.38	0.209781	0.336839	0.296576	0.08	0.0998947	0.032247	0.048146	0.059556	0.021	40007	255.85	1	1	1	0.962	0.95442	4.0007
230100	2020	232120	哈尔滨市	0.07	1.77	2.42154	0.404715	5.9194	0.1	10719	840156	2600000	1234	0.42	0.224199	0.292164	0.304985	0.08	0.0964147	0.04422	0.030041	0.046445	0.028	39791	253.17	1	1	1	1.0639	0.78236	3.9791
230100	2021	232121	哈尔滨市	0	1.76	2.5675	0.422866	6.28043	0.1	10719	888105	2700000	1184	0.46	0.185365	0.368737	0.312439	0.07	0.100828	0.000651	2e-05	0.000573	0.000501	42745	252.33	1	1	1	1.1496	0.9185	4.2745
230100	2022	232122	哈尔滨市	0.01	1.75	2.60551	0.439948	7.68117	0.1	10719	937851	2800000	1202	0.51	0.194084	0.246052	0.310674	0	0.101212	0.002435	0.007805	0.008819	5e-06	43981	251.11	1	1	1	1.0354		4.3981
230100	2023	232123	哈尔滨市	0.03	1.75	2.69976	0.455959	7.59915	0.1	10719	926096	3000000	1237	0.56	0.193812	0.289697	0.326054	0.01	0.106238	0.007946	0.017558	0.014612	0.011		253.2	1	1	1	1.003
230200	2003	232203	齐齐哈尔市	0.01	1.27	1.02397	0.001934	0.25111	0.01	4909	55096	345515	95	0.02	0.085512	0.424206	0.139047		0.0223092	0.005474	0.003741	8.7e-05	1.3e-05	5774	218.85	0	1	1	0.0699	0.05805	0.5774
230200	2004	232204	齐齐哈尔市	0	1.3	0.887478	0.002166	0.32707	0.01	4992	177000	364644	116	0.02	0.097028	0.356007	0.125286	0.01	0.0229439	0.00097	0	0.230739	1e-06	6373	215.46	0	1	1	0.0646	0.0645	0.6373
230200	2005	232205	齐齐哈尔市	0.01	1.31	0.789048	0.002468	0.34838	0.01	5307	200000	385307	128	0.02	0.134029	0.2792	0.137588	0	0.0228656	1.8e-06	0.008905	0.008798	6e-06	7233	220.2	0	1	1	0.0699	0.0715	0.7233
230200	2006	232206	齐齐哈尔市	0.01	1.33	0.662717	0.004107	0.34911	0.01	6606	155129	407653	172	0.02	0.148443	0.227701	0.135934	0.01	0.0246421	3.1e-05	0.009278	0.007666	0.001395	8000	219.23	0	1	1	0.0801	0.0864	0.8
230200	2007	232207	齐齐哈尔市	0.04	1.34	0.601665	0.005194	0.36218	0.01	7624	171541	431851	226	0.02	0.167043	0.222632	0.137768	0.01	0.0248315	0	0.037275	0.010421	1.3e-06	9561.72	221.63	0	1	1	0.0975	0.09658	0.956172
230200	2008	232208	齐齐哈尔市	0	1.34	0.510848	0.006583	0.44018	0.01	8490	185026	458088	226	0.03	0.173692	0.241841	0.136347	0.04	0.027738	0.002408	0.001094	0.001181	3.6e-05	11028.2	218.27	0	1	1	0.1096	0.1179	1.10282
230200	2009	232209	齐齐哈尔市	0.02	1.35	0.688515	0.008287	0.50304	0.01	8188	49381	486575	230	0.03	0.22499	0.222282	0.138195	0	0.0276921	3.8e-05	0.020466	0.020504	0.007738	11986.6	216.96	0	1	1	0.1055	0.145	1.19866
230200	2010	232210	齐齐哈尔市	0.01	1.34	0.613773	0.008287	0.49867	0.01	9861	215456	517545	349	0.03	0.236341	0.246823	0.136413	0.02	0.0311886	5e-07	0.007663	0.007547	3.1e-05	13377.2	214.72	0	1	1	0.1383	0.17257	1.33772
230200	2011	232211	齐齐哈尔市	0.02	1.34	0.59788	0.008287	0.50035	0.01	10874	285620	551263	349	0.03	0.22542	0.291672	0.132291	0.01	0.0308929	1.2e-05	0.019159	0.01885	0.000367	15199.8	212.63	0	1	1	0.2761	0.2155	1.51998
230200	2012	232212	齐齐哈尔市	0.04	1.32	0.646778	0.034832	0.50372	0.01	11789	14448	588025	343	0.03	0.224285	0.208563	0.160065	0.02	0.0396669	2.5e-06	0.038671	0.010208	0.00099	17169.6	213.23	0	1	1	0.3229	0.25953	1.71696
230200	2013	232213	齐齐哈尔市	0.12	1.31	0.738115	0.04155	0.51255	0.01	11444	312320	628165	380	0.03	0.229353	0.148697	0.157389	0.04	0.0358054	0.012503	0.108729	0.077477	0.007619	19063.9	216.77	0	1	1	0.266	0.303632	1.90639
230200	2014	232214	齐齐哈尔市	0.01	1.3	0.962751	0.047783	0.54815	0.01	12656	392100	672057	427	0.03	0.259384	0.30625	0.165173	0.12	0.04054	0.0001	0.012826	0.011723	0.002158	21283.2	218.26	0	1	1	0.2357	0.33096	2.12832
230200	2015	232215	齐齐哈尔市	0.01	1.29	1.10813	0.047282	0.63745	0.01	13427	471800	720126	401	0.03	0.305893	0.203228	0.168113	0.01	0.0373714	7.5e-05	0.006279	0.005485	0.00059	23022	219.7	0	1	1	0.2868		2.3022
230200	2016	232216	齐齐哈尔市	0.01	1.29	1.17771	0.050788	0.55042	0.01	14221	769900	772851	354	0.03	0.500287	0.115155	0.182216	0.01	0.0473825	4e-06	0.012912	0.010768	0.008801	24629	222.61	0	1	1	0.2908		2.4629
230200	2017	232217	齐齐哈尔市	0.02	1.29	1.18108	0.050859	0.55284	0.01	15036	769908	830777	355	0.03	0.347819	0.158652	0.18345	0.01	0.04023	9.5e-05	0.023327	0.018705	6.8e-05	26304	224.965	0	1	1	0.3448	0.244909	2.6304
230200	2018	232218	齐齐哈尔市	0.02	1.29	1.07287	0.010214	0.53741	0.01	15873	230100	892496	413	0.03	0.360327	0.1551	0.190733	0.02	0.0415185	0.003061	0.015243	0.017597	0.001732	28051	227.32	0	1	1	0.4067	0.271856	2.8051
230200	2019	232219	齐齐哈尔市	0.01	1.29	1.28346	0.011139	0.5681	0.01	16731	212434	947495	423	0.03	0.427441	0.150785	0.18813	0.02	0.0389429	0.000219	0.007705	0.006543	0.00138	30031	217.38	0	1	1	0.5228	0.30457	3.0031
230200	2020	232220	齐齐哈尔市	0.01	1.29	1.26708	0.01078	0.69752	0.01	17608	220528	992341	413	0.03	0.440771	0.141011	0.197094	0.01	0.0406184	0.000172	0.008486	0.006789	0.001869	30736	213.08	0	1	1	0.6648		3.0736
230200	2021	232221	齐齐哈尔市	0	1.29	1.28569	0.010449	0.56643	0.01	18504	228621	1000000	403	0.03	0.417107	0.165508	0.20079	0.01	0.0427024	0	5.1e-07	4e-06	0.000245	33084	213.39	0	1	1	0.6128		3.3084
230200	2022	232222	齐齐哈尔市	0	1.29	1.28928	0.010144	0.58912	0.01	19417	236937	1100000	413	0.03	0.430691	0.171478	0.203603	0	0.0446715	1e-06	0.000177	0.000109	2.5e-05	34619	212.58	0	1	1	0.5195		3.4619
230200	2023	232223	齐齐哈尔市	0.01	1.29	1.39146	0.009861	0.59076	0.01	20348	283719	1100000	420	0.03	0.456248	0.185133	0.21235	0	0.0455978	0.001746	0.003356	0.004323	0.000778		215.12	0	1	1	0.5178
230300	2003	232303	鸡西市	0	0.86	1.07623	0.000785	0.081	0	3726	26555	288008	40	0.01	0.073247	0.419181	0.137528		0.0195806	0.000371	0.002639	6.5e-06	4e-06	6012	203.67	0	1	1	0.0005187	0.0161	0.6012
230300	2004	232304	鸡西市	0	0.86	0.84271	0.000905	0.10264	0	3483	30065	296919	47	0.01	0.071996	0.378056	0.142924	0	0.0234679	0.000485	0	0.081474	0.000929	6590	199.5	0	1	1	0.0005187	0.0179	0.659
230300	2005	232305	鸡西市	0.01	0.85	0.6	0.001053	0.1	0	5077	61781	306121	63	0.01	0.087961	0.395483	0.16235	0	0.0230379	0.002448	0.003372	0.02531	0.003618	7420	207.5	0	1	1	0.0005187	0.02	0.742
230300	2006	232306	鸡西市	0.01	0.85	0.540154	0.001154	0.11	0	5550	70427	315622	77	0.01	0.09436	0.431936	0.156912	0.01	0.0223227	0	0.008833	0.000785	1.3e-05	8333	207.82	0	1	1	0.0005187	0.028	0.8333
230300	2007	232307	鸡西市	0.02	0.85	0.497251	0.001816	0.10379	0	5248	82663	325432	89	0.01	0.103831	0.399039	0.169245	0.01	0.0273493	0.004067	0.011362	0.001464	0.000261	9309	213.73	0	1	1	0.0005187	0.0345	0.9309
230300	2008	232308	鸡西市	0	0.85	0.483458	0.002275	0.09509	0	5792	84413	335564	98	0.01	0.106603	0.439937	0.170024	0.02	0.0283986	0	7.2e-05	2.7e-05	5e-07	10720	213.39	0	1	1	0.0005187	0.0403	1.072
230300	2009	232309	鸡西市	0	0.85	0.600397	0.002425	0.10335	0	5007	98211	346027	111	0.01	0.110228	0.471331	0.165804	0	0.029286	0	0.001741	0.001693	0.000674	11613.2	206.65	0	1	1	0.0005187	0.2	1.16132
230300	2010	232310	鸡西市	0.01	0.84	0.536308	0.006661	0.10578	0	5731	156523	356832	120	0.01	0.11281	0.548926	0.164802	0	0.0305012	0	0.006985	0.006983	3.7e-05	13004.7	205.59	0	1	1	0.0005187	0.0501	1.30047
230300	2011	232311	鸡西市	0.01	0.84	0.528521	0.0084	0.10689	0	5838	115855	367992	159	0.01	0.115222	0.602058	0.173194	0.01	0.0339124	0	0.014234	0.014234	0.000286	15262.7	204.09	0	1	1	0.0005187	0.055	1.52627
230300	2012	232312	鸡西市	0.01	0.83	0.529215	0.0101	0.09841	0	5881	129481	379519	163	0.01	0.11741	0.632918	0.177881	0.01	0.0371067	3.6e-05	0.010172	0.000932	0.000202	16980	201.32	0	1	1	0.0005187	0.06021	1.698
230300	2013	232313	鸡西市	0.05	0.83	0.647124	0.0101	0.09141	0	5325	118571	391425	174	0.01	0.135577	0.572954	0.177	0.01	0.0353281	0.004259	0.042853	0.034613	0.000638	17696.8	202.11	0	1	1	0.0005187	0.0664	1.76968
230300	2014	232314	鸡西市	0.01	0.81	0.878781	0.0101	0.08812	0	5482	125000	403724	180	0.01	0.155551	0.534857	0.185353	0.05	0.0359444	0	0.007806	0.007806	0.000426	19375.2	200.49	0	1	1	0.0005187	0.07238	1.93752
230300	2015	232315	鸡西市	0	0.81	1.13304	0.01404	0.0826	0	5461	130114	416428	172	0.02	0.152941	0.438828	0.196265	0.01	0.0383401	1.5e-05	0.000223	4.4e-05	0.000463	20132	200.18	0	1	1	0.0005187		2.0132
230300	2016	232316	鸡西市	0	0.81	1.3391	0.014842	0.08725	0	5447	150728	429552	173	0.02	0.331652	0.211359	0.20605	0	0.0404417	0	0.000172	9.7e-05	0.002502	21227	203.43	0	1	1	0.0005215		2.1227
230300	2017	232317	鸡西市	0	0.81	1.4847	0.015733	0.01901	0	5439	223020	443111	177	0.02	0.35307	0.205501	0.205341	0	0.0406498	1.5e-05	0.000393	0.00034	0.013	22607	203.815	0	1	1	0.0005472		2.2607
230300	2018	232318	鸡西市	0	0.81	1.48696	0.01652	0.08849	0	5434	224612	479178	188	0.02	0.301309	0.211755	0.211066	0	0.0419636	3e-05	0.004637	0.00247	0.00077	23889	204.2	0	1	1	0.0005727		2.3889
230300	2019	232319	鸡西市	0	0.81	1.51545	5e-05	0.09129	0	5430	226203	478354	187	0.02	0.314271	0.191785	0.214542	0	0.042116	8e-05	0.000985	0.000569	0.000496	25413	202.44	0	1	1	0.0005762		2.5413
230300	2020	232320	鸡西市	0.01	0.81	1.57308	0.000108	0.09629	0	5428	267102	494738	189	0.02	0.376479	0.156307	0.218383	0	0.0436502	0.001365	0.008487	0.009726	0.000126	25957	200.57	0	1	1	0.0006184		2.5957
230300	2021	232321	鸡西市	0	0.81	1.5883	0.000108	0.09852	0	5427	308000	511121	191	0.02	0.298929	0.2195	0.228839	0.01	0.0467808	0.0004	5.5e-05	0.000721	0.00037	28252	205.95	0	1	1	0.0006697		2.8252
230300	2022	232322	鸡西市	0	0.81	1.5113	0.000108	0.10373	0	5426	103824	527504	191	0.02	0.33607	0.204044	0.225064	0	0.0472873	0.000849	4e-05	0.000884	1e-05	29981	203.46	0	1	1	0.0006579		2.9981
230300	2023	232323	鸡西市	0	0.81	1.57903	0.000108	0.1043	0	5426	97386	543888	174	0.02	0.362267	0.208978	0.234651	0	0.0510191	0.000277	0.000442	0.000486	0.000233	30981	205.31	0	1	1	0.0006201		3.0981
230400	2003	232403	鹤岗市	0	0.75	1.3509	1.2e-05	0.01055	0	2333	13927	205474	24	0	0.124033	0.30505	0.172441		0.0258314	0.000429	0.001031	6e-05	0.000703	5714	204.35	0	1	1	0.0004771	0.0188	0.5714
230400	2004	232404	鹤岗市	0.23	0.75	1.09763	5.5e-05	0.03101	0	3063	17553	211334	31	0	0.109335	0.316482	0.16962	0	0.0251138	0.190806	0.042956	0.032954	7e-05	6532	204.32	0	1	1	0.0004771	0.0029	0.6532
230400	2005	232405	鹤岗市	0.02	0.75	1.00114	0.000168	0.0186	0	3296	45952	217869	38	0	0.128991	0.391626	0.184126	0.23	0.0274023	0	0.017112	0.020001	7.1e-05	7489	210.25	0	1	1	0.0004771	0.0036	0.7489
230400	2006	232406	鹤岗市	0	0.75	0.93816	0.000206	0.0233	0	2746	50733	225176	35	0	0.154934	0.34929	0.182018	0.02	0.0286541	0.000156	4.4e-05	0.012088	0.00131	8400	210.21	0	1	1	0.0004771	0.0049	0.84
230400	2007	232407	鹤岗市	0.01	0.75	0.848105	0.000615	0.02999	0	2697	52327	233366	46	0	0.159268	0.317899	0.191508	0	0.0320852	4.3e-05	0.010421	0.007862	8.8e-06	9077	210.32	0	1	1	0.0004771	0.005387	0.9077
230400	2008	232408	鹤岗市	0	0.75	0.770153	0.001015	0.02557	0	2502	63551	242574	52	0.01	0.163771	0.308505	0.19194	0.01	0.0331482	0.000545	0.001252	0.001767	8.4e-05	10002	207.25	0	1	1	0.0004771	0.00582	1.0002
230400	2009	232409	鹤岗市	0.01	0.75	1.02686	0.009818	0.02977	0	3447	102831	252957	63	0	0.203361	0.285481	0.187232	0	0.0329428	1.1e-05	0.010028	0.010028	4.6e-05	10847.3	203.66	0	1	1	0.0004771		1.08473
230400	2010	232410	鹤岗市	0	0.74	0.903153	0.007128	0.02625	0	3343	114223	264704	78	0	0.204297	0.302022	0.190694	0.01	0.0357728	0.000308	0.000138	3.2e-05	0.000357	12044.3	199.5	0	1	1	0.0004771	0.01137	1.20443
230400	2011	232411	鹤岗市	0.01	0.74	0.795434	0.004438	0.05604	0	3369	101359	278044	96	0	0.197428	0.34275	0.185181	0	0.0360159	0.000698	0.00898	0.009049	0.000218	13929.9	194.96	0	1	1	0.0004771	0.02091	1.39299
230400	2012	232412	鹤岗市	0	0.74	0.774016	0.005201	0.06639	0	3080	77705	293251	100	0	0.222612	0.340381	0.190558	0.01	0.0391044	6e-06	0.000937	0.001021	0.000479	15697.7	193.27	0	1	1	0.0004771	0.03183	1.56977
230400	2013	232413	鹤岗市	0.02	0.74	0.964562	0.006	0.05781	0	3013	82815	310662	112	0	0.23375	0.273917	0.198416	0	0.0393343	0.004801	0.013652	0.007418	0.000608	16001.3	195.72	0	1	1	0.0004771	0.027094	1.60013
230400	2014	232414	鹤岗市	0	0.73	1.36264	0.007	0.01854	0	2490	88917	330687	116	0	0.287735	0.225115	0.20884	0.02	0.0384742	0.002041	6.6e-05	2.1e-05	0.015	18115.9	196.02	0	1	1	0.0004771	0.02953	1.81159
230400	2015	232415	鹤岗市	0.01	0.72	1.70795	0.0077	0.02218	0	2666	63058	353836	107	0	0.338271	0.173502	0.219894	0	0.0403163	0.00187	0.007706	0.007535	0.000188	18891	198.74	0	1	1	0.0004779	0.032971	1.8891
230400	2016	232416	鹤岗市	0.01	0.72	1.84225	0.007482	0.02234	0	2730	64989	380738	108	0	0.402604	0.177469	0.222731	0.01	0.041567	0.002203	0.005564	0.005206	4.5e-05	20085	200.53	0	1	1	0.0004754	0.03704	2.0085
230400	2017	232417	鹤岗市	0.02	0.72	1.84631	0.00373	0.02512	0	2753	62581	412189	114	0	0.393053	0.208034	0.234717	0.01	0.0446487	0.002886	0.02104	0.010773	0.006246	21370	203.47	0	1	1	0.0004828	0.0467509	2.137
230400	2018	232418	鹤岗市	0.01	0.72	1.71711	0.000101	0.0236	0	2761	62974	446828	121	0	0.399397	0.218233	0.239903	0.02	0.0466914	0.002382	0.008319	0.006535	0.000163	22639	206.41	0	1	1	0.0005147		2.2639
230400	2019	232419	鹤岗市	0.02	0.72	1.38697	0.000145	0.02926	0	2763	54041	472467	138	0	0.425459	0.174462	0.252586	0.01	0.0497013	0.000399	0.016078	0.015875	0.000602	24149	212.17	0	1	1	0.000522		2.4149
230400	2020	232420	鹤岗市	0.01	0.72	1.56535	0.000212	0.03727	0	2764	56468	485570	133	0	0.402434	0.16798	0.242484	0.02	0.0450235	0.001149	0.008064	0.007848	0.001365	24521	208.7	0	1	1	0.0005883		2.4521
230400	2021	232421	鹤岗市	0	0.72	1.79712	0.000153	0.04089	0	2765	58896	498672	128	0	0.342627	0.232926	0.243081	0.01	0.046269	5e-06	0.000261	0.000229	5e-05	26042	210.86	0	1	1	0.0006585		2.6042
230400	2022	232422	鹤岗市	0	0.72	1.63956	0.000202	0.04254	0	2765	65325	511775	111	0	0.32954	0.228362	0.243415	0	0.0488199	0.000157	2e-06	0.000101	0.000652	27325	210.02	0	1	1	0.0006066		2.7325
230400	2023	232423	鹤岗市	0	0.72	1.7154	0.00016	0.02613	0	2765	67070	524878	108	0	0.35651	0.235377	0.251131	0	0.0507454	0.000618	4e-05	7.1e-05	0.000587		211.04	0	1	1	0.0005889
230500	2003	232503	双鸭山市	0	0.67	1.19888	7e-05	0	0	2352	51945	427398	32	0	0.101838	0.264814	0.132109		0.0168673	0.00181	9.9e-05	0.000556	0.000849	5227	202.38	0	1	1	0.0002079	0.005	0.5227
230500	2004	232504	双鸭山市	0.1	0.67	0.992761	0.000926	0.02221	0	2844	52735	429826	35	0	0.104446	0.232995	0.135058	0	0.0179426	0.047799	0.048857	0.004798	2.2e-05	6403	199.28	0	1	1	0.0002079	0.0069	0.6403
230500	2005	232505	双鸭山市	0.03	0.67	0.888838	3e-05	0.04442	0	3721	54620	432375	35	0.01	0.126311	0.276036	0.156734	0.1	0.0227419	3.2e-06	0.025612	0.000485	1.1e-05	7414	199.29	0	1	1	0.0002079	0.008	0.7414
230500	2006	232506	双鸭山市	0.01	0.67	0.861549	0.000806	0.03821	0	4552	54493	435051	46	0.01	0.144088	0.266911	0.160265	0.03	0.0237891	0	0.007666	0.007286	2e-07	8404	200.57	0	1	1	0.0002079	0.0098	0.8404
230500	2007	232507	双鸭山市	0	0.65	0.746875	0.001581	0.01782	0	3729	57367	437863	79	0.01	0.152203	0.268842	0.170669	0.01	0.0294625	0.001975	0.000741	0.006	1e-05	10056	198.91	0	1	1	0.0002079	0.012	1.0056
230500	2008	232508	双鸭山市	0	0.65	0.546545	0.00128	0.01834	0	3831	62244	440817	90	0.01	0.160728	0.297537	0.169124	0	0.030947	0	0.00312	0.00312	0.008695	11743.5	193.06	0	1	1	0.0002079	0.0155	1.17435
230500	2009	232509	双鸭山市	0.01	0.65	0.701341	0.00098	0.02164	0	4479	64111	443922	107	0.01	0.199934	0.298454	0.174258	0	0.0323269	0	0.012125	0.012125	7.4e-05	12754.1	194.1	0	1	1	0.0002079	0.0203	1.27541
230500	2010	232510	双鸭山市	0.02	0.65	0.623287	0.000892	0.02258	0	3795	69240	447187	127	0.01	0.185223	0.32764	0.147958	0.01	0.0271166	0	0.016679	0.016671	0.00181	14157.3	193.54	0	1	1	0.0002079	0.0809	1.41573
230500	2011	232511	双鸭山市	0.01	0.65	0.688705	0.003339	0.03898	0	3803	74779	450621	129	0.01	0.162749	0.328043	0.153493	0.02	0.0308686	0	0.01005	0.01005	6e-06	16165.6	189	0	1	1	0.0002079	0.02962	1.61656
230500	2012	232512	双鸭山市	0	0.65	0.682776	0.003939	0.04093	0	3140	83752	454233	145	0.02	0.175807	0.323557	0.155203	0.01	0.0318907	3.6e-05	0.000995	0.023797	0.003089	18024	188	0	1	1	0.0002079	0.0359	1.8024
230500	2013	232513	双鸭山市	0.03	0.65	0.779595	0.004568	0.02074	0	3283	94640	458034	153	0.02	0.185293	0.281873	0.16463	0	0.0344726	0.004157	0.020885	0.014555	0.001347	18733.8	188.56	0	1	1	0.0002079		1.87338
230500	2014	232514	双鸭山市	0.05	0.66	1.21896	0.002669	0.0349	0	2504	104104	462037	163	0.02	0.239094	0.178411	0.191125	0.03	0.0377792	2.1e-05	0.049302	0.028171	0.011	19965.4	196.9	0	1	1	0.0002079		1.99654
230500	2015	232515	双鸭山市	0.01	0.65	1.73027	0.0028	0.21584	0	2432	113473	466251	177	0.02	0.269546	0.202988	0.178751	0.05	0.0319067	0.000215	0.007937	0.008012	0.004407	21248	199.79	0	1	1	0.0002079		2.1248
230500	2016	232516	双鸭山市	0.02	0.66	1.91415	0.002991	0.22231	0	2441	124820	470692	179	0.02	0.307315	0.155239	0.191167	0.01	0.0353143	0.000264	0.01694	0.008403	0.000177	22416	204.45	0	1	1	0.0002079		2.2416
230500	2017	232517	双鸭山市	0.01	0.65	1.87629	0.003182	0.18365	0	2440	73587	475373	140	0.02	0.326725	0.152725	0.194491	0.02	0.0347967	3e-06	0.012625	0.006382	0.008418	23806	203.11	0	1	1	0.0002079	0.0547312	2.3806
230500	2018	232518	双鸭山市	0.01	0.66	1.80216	0.001297	0.14499	0	2440	84625	492834	154	0.02	0.296104	0.176724	0.1972	0.01	0.0358336	0.002112	0.004253	0.004633	0.000721	25272	201.77	0	1	1	0.0002197		2.5272
230500	2019	232519	双鸭山市	0.01	0.65	1.93173	0.00226	0.10633	0.01	2440	85613	492108	155	0.03	0.367727	0.154563	0.218933	0.01	0.0404076	1.4e-05	0.005896	0.005572	0.000338	26844	214.06	0	1	1	0.0002303		2.6844
230500	2020	232520	双鸭山市	0.01	0.65	1.85111	0.002195	0.06767	0.01	2440	78562	496239	162	0.03	0.361975	0.142128	0.201547	0.01	0.0394984	8e-05	0.008753	0.008098	0.000734	27340	191.51	0	1	1	0.0002197		2.734
230500	2021	232521	双鸭山市	0	0.65	1.834	0.002198	0.06775	0.01	2440	71511	500370	170	0.03	0.291246	0.211104	0.204622	0.01	0.0420736	0.00018	0.000393	0.000201	0.00769	29448	194.95	0	1	1	0.0006225		2.9448
230500	2022	232522	双鸭山市	0	0.65	1.75944	0.002198	0.06783	0.01	2440	77947	504501	167	0.03	0.310225	0.219713	0.208953	0	0.0430671	0	0.000346	0.000246	2e-06	30937	196.56	0	1	1	0.0006078		3.0937
230500	2023	232523	双鸭山市	0	0.65	1.87597	0.002198	0.05585	0.01	2440	77152	508632	169	0.03	0.366792	0.219032	0.213747	0	0.0430665	6e-05	8e-05	5.8e-05	8.3e-05		195.28	0	1	1	0.0005737
230600	2003	232603	大庆市	0	1.22	0.179697	0.001839	0.32019	0.02	3002	152171	2300000	72	0.04	0.031284	0.84951	0.118788		0.0319669	0.001259	0.001862	3.1e-05	0.001536	11029	207.59	0	1	1	0.0007236	0.0396	1.1029
230600	2004	232604	大庆市	0.03	1.24	0.147735	0.002411	0.4239	0.02	3283	164915	2300000	110	0.04	0.040486	0.878645	0.11654	0	0.031873	0.002388	0.030582	0.00405	2.3e-05	12324	207.93	0	1	1	0.0007236	0.0495	1.2324
230600	2005	232605	大庆市	0.02	1.25	0.13462	0.003081	0.53889	0.02	3458	176942	2300000	126	0.05	0.046222	0.708323	0.120925	0.03	0.0345735	0	0.020253	0.000496	0.003119	13662	207.02	0	1	1	0.0007236	0.0519	1.3662
230600	2006	232606	大庆市	0	1.27	0.135353	0.004429	0.54251	0.02	3241	198330	2300000	200	0.06	0.044285	0.721571	0.125614	0.02	0.037325	3.7e-05	0.001169	0.000525	0.001869	14791	207.07	0	1	1	0.0007236	0.0589	1.4791
230600	2007	232607	大庆市	0.01	1.29	0.137825	0.009267	0.57351	0.02	3496	186263	2300000	201	0.08	0.047593	0.724786	0.142372	0	0.0439875	5e-07	0.007921	0.815904	0.00094	15570	208	0	1	1	0.0007236	0.0619	1.557
230600	2008	232608	大庆市	0.01	1.31	0.112234	0.011698	0.5973	0.02	3586	215333	2300000	229	0.07	0.049957	0.744205	0.146198	0.01	0.048456	0.000308	0.005095	0.005138	0.004	16816	207.68	0	1	1	0.0007236	0.06391	1.6816
230600	2009	232609	大庆市	0	1.32	0.15283	0.013997	0.64851	0.02	4308	232035	2300000	246	0.07	0.056469	0.705701	0.159386	0.01	0.0505655	2e-05	0.003002	0.003022	0.000295	18180.8	212.74	0	1	1	0.0007236	0.07	1.81808
230600	2010	232610	大庆市	0.02	1.32	0.141299	0.034587	0.64158	0.02	4750	248053	2300000	293	0.07	0.045228	0.731118	0.178409	0	0.0604939	0.000297	0.01951	0.019807	0.000118	20015.6	210.2	0	1	1	0.0007236	0.07435	2.00156
230600	2011	232611	大庆市	0.02	1.33	0.13218	0.04221	0.64184	0.02	4971	302433	2300000	347	0.07	0.046636	0.756079	0.193153	0.02	0.0697663	0.000646	0.016107	0.016113	0.000583	22500.3	209.77	0	1	1	0.0007236	0.09154	2.25003
230600	2012	232612	大庆市	0.02	1.31	0.167893	0.050307	0.65281	0.02	5014	306904	2300000	350	0.07	0.045233	0.775366	0.202075	0.02	0.0748203	0.00467	0.019147	0.010697	0.000946	25222.9	210.42	0	1	1	0.0007236	0.1003	2.52229
230600	2013	232613	大庆市	0.07	1.31	0.184242	0.060032	0.7001	0.02	8392	317877	2300000	406	0.07	0.04425	0.776077	0.214431	0.02	0.0789824	0.017596	0.047077	0.045497	0.007213	27755	211.24	0	1	1	0.0007236	0.1207	2.7755
230600	2014	232614	大庆市	0.04	1.3	0.214755	0.068	0.62407	0.02	5361	315517	2300000	403	0.07	0.043881	0.788267	0.223193	0.07	0.0802353	0.00097	0.040265	0.03429	0.011	32307.4	214.04	0	1	1	0.0007238	0.13156	3.23074
230600	2015	232615	大庆市	0.04	1.3	0.312999	0.073456	0.64552	0.02	6101	310947	2300000	366	0.07	0.065909	0.647039	0.22579	0.04	0.0721355	0.000438	0.041419	0.028167	0.019	34402	221.06	0	1	1	0.0007247		3.4402
230600	2016	232616	大庆市	0.01	1.31	0.366863	0.062154	0.60889	0.02	5986	300714	2300000	379	0.07	0.10097	0.494231	0.239841	0.04	0.07165	0.000809	0.006854	0.005161	0.00039	36509	228.59	0	1	1	0.0007279		3.6509
230600	2017	232617	大庆市	0.02	1.31	0.404301	0.050853	0.46404	0.02	6003	226957	2200000	398	0.07	0.10992	0.526987	0.241692	0.01	0.0729438	0.000479	0.022423	0.014484	0.000594	38736	229.69	0	1	1	0.0007402	0.1251	3.8736
230600	2018	232618	大庆市	0.01	1.32	0.388003	0.039551	0.62551	0.02	6000	287039	2200000	434	0.07	0.107341	0.501749	0.249032	0.02	0.0771603	0.003523	0.005117	0.007869	2e-07	41091	230.79	0	1	1	0.0007536		4.1091
230600	2019	232619	大庆市	0.02	1.33	0.436196	0.007225	0.61752	0.02	6001	211475	2200000	376	0.07	0.123018	0.519568	0.240997	0.01	0.0701998	0.000813	0.022165	0.016618	0.00636	43298	229.26	0	1	1	0.0007682		4.3298
230600	2020	232620	大庆市	0.04	1.33	0.524283	0.003403	0.6202	0.02	6001	257106	2300000	384	0.07	0.146415	0.453748	0.255169	0.02	0.0671636	0.00109	0.039319	0.027412	0.013	42891	231.08	0	1	1	0.0008162	0.14999	4.2891
230600	2021	232621	大庆市	0	1.34	0.490519	0.001803	0.60223	0.02	6001	302736	2300000	391	0.07	0.128569	0.548582	0.252476	0.04	0.0723151	1e-06	0.000504	0.000112	0.005183	45876	227.24	0	1	1	0.0008324		4.5876
230600	2022	232622	大庆市	0.01	1.34	0.4472	0.001056	0.14329	0.02	6001	249724	2300000	366	0.07	0.123028	0.497634	0.245025	0	0.0726821	5.6e-05	0.013333	0.001675	0.000405	47482	222.15	0	1	1	0.0008098		4.7482
230600	2023	232623	大庆市	0	1.34	0.477178	0.000672	0.65453	0.02	6001	230789	2400000	398	0.07	0.128915	0.460977	0.254977	0.01	0.0760566	0.000857	0.001837	0.00176	0.000934		224.27	0	1	1	0.0007751
230700	2003	232703	伊春市	0	0.4	1.00752	0.000183	0.01318	0	527	18808	61167	15	0	0.127296	0.203609	0.159286		0.0195139	2.6e-05	0.000747	3.6e-05	0.000411	6001	208.81	0	1	1	0.0004745	0.0121	0.6001
230700	2004	232704	伊春市	0.01	0.4	0.822504	0.000352	0.0187	0	494	28782	64253	21	0	0.139603	0.14244	0.158805	0	0.0198942	0.000855	0.004798	0.021641	0.00024	6463	208.49	0	1	1	0.0004745	0.0201	0.6463
230700	2005	232705	伊春市	0	0.39	0.538356	0.000686	0.01795	0	630	40668	67811	29	0	0.129945	0.175001	0.168054	0.01	0.0205359	0	0.000485	2.08	0.00433	6994	211.5	0	1	1	0.0004745	0.0226	0.6994
230700	2006	232706	伊春市	0.01	0.39	0.522221	0.000986	0.02855	0	701	46888	71933	30	0	0.15277	0.148154	0.171076	0	0.0216533	0	0.012116	0.022557	0.00054	7416	211.64	0	1	1	0.0004745	0.0256	0.7416
230700	2007	232707	伊春市	0.01	0.39	0.481827	0.000625	0.01925	0	733	51141	76734	39	0	0.186615	0.131592	0.168394	0.01	0.0215771	0	0.006	0.033031	3.5e-05	8010	209.97	0	1	1	0.0004745	0.0301	0.801
230700	2008	232708	伊春市	0	0.39	0.432101	0.001497	0.0221	0	734	52188	82358	51	0.01	0.20894	0.129141	0.169376	0.01	0.0224881	0.00068	0.0004	0.001075	0.000604	8724	209.61	0	1	1	0.0004745	0.03367	0.8724
230700	2009	232709	伊春市	0.01	0.39	0.501239	0.002769	0.02482	0	1357	80488	88989	56	0	0.297434	0.114262	0.177986	0	0.0288511	6.3e-05	0.009354	0.009355	0.000372	9453.35	199.58	0	1	1	0.0004745	0.0382	0.945335
230700	2010	232710	伊春市	0.03	0.39	0.513987	0.006467	0.02047	0	1524	85001	96863	68	0	0.314786	0.130566	0.18155	0.01	0.0305018	3e-05	0.02478	0.02481	0.005801	10317.5	199.07	0	1	1	0.0004745	0.04198	1.03175
230700	2011	232711	伊春市	0.02	0.39	0.440285	0.00833	0.02242	0	1650	63756	106285	77	0	0.343491	0.127079	0.179638	0.03	0.0311974	0	0.015618	0.015618	0.000321	11681.1	197.69	0	1	1	0.0004745	0.0482	1.16811
230700	2012	232712	伊春市	0.01	0.38	0.478749	0.005676	0.01104	0	1718	77711	117655	81	0	0.360062	0.132187	0.188003	0.02	0.0338084	3.6e-05	0.010696	0.001077	0.005918	13425.1	194.71	0	1	1	0.0004754	0.0543	1.34251
230700	2013	232713	伊春市	0.02	0.38	0.449107	0.00653	0.0107	0	1844	79687	131502	83	0	0.349869	0.149129	0.188997	0.01	0.0334086	0.004157	0.012538	0.008348	0.001873	15370	196.27	0	1	1	0.0004754	0.0584	1.537
230700	2014	232714	伊春市	0.08	0.37	0.548736	0.000948	0.0106	0	775	84882	148539	98	0	0.402007	0.142269	0.199473	0.02	0.035385	2.6e-05	0.07485	0.037422	0.002169	19090.8	192.27	0	1	1	0.0004771	0.06366	1.90908
230700	2015	232715	伊春市	0	0.37	0.593988	0.00105	0.0103	0	859	68215	169733	110	0	0.580935	0.098874	0.183567	0.08	0.0336254	2e-06	0.004255	0.002086	0.019	20844	194.47	0	1	1	0.0004796		2.0844
230700	2016	232716	伊春市	0	0.37	0.662319	0.000459	0.01611	0	785	66807	196420	111	0	0.505276	0.110649	0.18582	0	0.0347458	4e-05	4.5e-05	4e-05	0.002288	22189	194.77	0	1	1	0.0004844		2.2189
230700	2017	232717	伊春市	0	0.37	0.687459	0.0005	0.01803	0	850	62442	230474	100	0	0.574013	0.109248	0.204718	0	0.0361588	0	0.003181	0.003181	0.006295	23676	198.215	0	1	1	0.0004934	0.125756	2.3676
230700	2018	232718	伊春市	0	0.37	0.657331	0.000587	0.03588	0	793	123187	334492	104	0	0.571502	0.114155	0.209945	0	0.0374268	0.002322	0.001507	0.003666	0.002594	25191	201.66	0	1	1	0.0005112		2.5191
230700	2019	232719	伊春市	0	0.37	0.551593	0.000589	0.02392	0	842	56721	354682	111	0	0.585494	0.110496	0.222775	0	0.0404258	0	0.000528	0.000355	0.000173	26707	205.14	0	1	1	0.0005659		2.6707
230700	2020	232720	伊春市	0	0.37	0.641668	0.000588	0.04143	0.01	799	60835	384109	113	0	0.675395	0.076765	0.226499	0	0.0416735	2e-05	0.000702	0.000422	0.0003	26881	202.76	0	1	1	0.0005943		2.6881
230700	2021	232721	伊春市	0	0.37	0.643397	0.000589	0.06276	0.01	837	64949	413536	115	0	0.593781	0.093801	0.22707	0	0.0435847	0.00053	0.000436	0.04301	0.002051	29194	204.02	0	1	1	0.0006269		2.9194
230700	2022	232722	伊春市	0	0.37	0.663438	0.000588	0.07081	0.01	804	75012	442962	115	0	0.600233	0.101005	0.23174	0	0.0450059	5e-06	5e-06	5e-06	0.009103	29216	205.39	0	1	1	0.0006004		2.9216
230700	2023	232723	伊春市	0	0.37	0.664332	0.000589	0.07886	0.01	832	65826	472389	108	0	0.630315	0.125632	0.238471	0	0.0495557	5e-07	8.6e-05	2.7e-05	5.9e-05		207.41	0	1	1	0.0005922
230800	2003	232803	佳木斯市	0	0.75	1.08867	0.000137	0.25959	0	2109	41719	108462	61	0	0.10912	0.25637	0.151933		0.0212814	5e-07	0.002413	0.001789	5e-07	5709	216.89	0	1	1	0.0006601	0.0072	0.5709
230800	2004	232804	佳木斯市	0	0.76	0.864997	0.000209	0.25001	0	2811	96296	115199	70	0.01	0.105333	0.185358	0.150786	0	0.0218317	0.004037	2.8e-05	0.003375	0.000906	6225	213	0	1	1	0.0006601	0.0085	0.6225
230800	2005	232805	佳木斯市	0	0.75	0.798543	0.000175	0.25331	0	2505	105000	122762	86	0.01	0.128256	0.175721	0.161762	0	0.022717	1.1e-05	0.000485	0.09065	0.003628	6826	216.92	0	1	1	0.0006601	0.0105	0.6826
230800	2006	232806	佳木斯市	0.01	0.76	0.687858	0.001726	0.27619	0	3075	118000	131283	123	0.01	0.151353	0.205537	0.167776	0	0.0249071	0	0.007503	0.926635	0.000276	7791	217.24	0	1	1	0.0006601	0.0125	0.7791
230800	2007	232807	佳木斯市	0.82	0.77	0.528661	0.002579	0.27453	0	3413	123000	140919	140	0.01	0.162729	0.155505	0.169058	0.01	0.0253064	0.726732	0.095656	0.040071	0.008798	9218	217.14	0	1	1	0.0006601	0.0165	0.9218
230800	2008	232808	佳木斯市	0	0.77	0.541536	0.0047	0.2894	0	3383	140000	151856	167	0.01	0.177373	0.155644	0.167536	0.82	0.0268316	3.1e-05	0.00032	3.1e-05	0.000818	10158	214.89	0	1	1	0.0006601	0.0199	1.0158
230800	2009	232809	佳木斯市	0.01	0.77	0.649143	0.005128	0.32472	0	3251	228000	164321	177	0.01	0.20451	0.164324	0.168849	0	0.0280607	0.00011	0.005088	0.005198	0.000152	11021.3	210.56	0	1	1	0.0006601	0.0208	1.10213
230800	2010	232810	佳木斯市	0.01	0.78	0.667872	0.0113	0.30706	0	3355	250000	178588	205	0.01	0.237694	0.171179	0.174333	0.01	0.0309651	4.8e-05	0.007653	0.007675	0.003699	12185.7	215.74	0	1	1	0.0006601	0.0241	1.21857
230800	2011	232811	佳木斯市	0.01	0.77	0.709715	0.01508	0.31593	0	3324	150000	194990	220	0.01	0.227566	0.221221	0.178529	0.01	0.0334418	2.5e-05	0.008785	0.008786	3e-05	13923.8	211.9	0	1	1	0.0006601	0.0282	1.39238
230800	2012	232812	佳木斯市	0	0.73	0.803944	0.006678	0.43905	0	4150	164000	213937	232	0.01	0.240393	0.236193	0.17824	0.01	0.0365233	0.000245	0.003016	0.008251	0.00074	15712.7	212.84	0	1	1	0.0006601	0.0287	1.57127
230800	2013	232813	佳木斯市	0.06	0.74	0.777259	0.021	0.44935	0	272423	166754	235933	234	0.01	0.251611	0.218114	0.184311	0	0.038097	0.004174	0.052469	0.040581	0.000148	17862.9	207.31	0	1	1	0.0006601	0.03606	1.78629
230800	2014	232814	佳木斯市	0.02	0.74	1.02946	0.023	0.44716	0	5103	180000	261606	238	0.01	0.244803	0.224049	0.200704	0.06	0.0422348	9.6e-05	0.019468	0.017342	0.001364	21518	211.18	0	1	1	0.0006601	0.03931	2.1518
230800	2015	232815	佳木斯市	0	0.73	1.49006	0.024	0.33834	0	40573	189000	291735	243	0.01	0.261765	0.16968	0.199223	0.02	0.0392954	0.000516	0.000325	0.000286	0.005879	23033	210.85	0	1	1	0.0006603	0.0454	2.3033
230800	2016	232816	佳木斯市	0.02	0.73	1.78465	0.001981	0.31822	0	14924	118000	327304	255	0.01	0.279537	0.159881	0.208962	0	0.0413472	8.4e-05	0.017846	0.017754	0.002782	24632	215.04	0	1	1	0.0006605	0.0502	2.4632
230800	2017	232817	佳木斯市	0	0.73	1.75596	0.001185	0.23027	0	24177	151000	369557	273	0.01	0.276464	0.144924	0.213186	0.02	0.0448536	0.000343	0.000828	0.000577	0.004378	26332	211.765	0	1	1	0.0006612	0.055	2.6332
230800	2018	232818	佳木斯市	0.02	0.73	1.79095	0.000217	0.38807	0	19157	470801	441121	295	0.01	0.269546	0.151285	0.214284	0	0.0456442	0.004209	0.01446	0.017947	0.002182	28141	208.49	0	1	1	0.0006612	0.0728	2.8141
230800	2019	232819	佳木斯市	0	0.73	2.34729	9.8e-05	0.52525	0	21433	148700	468643	283	0.01	0.390465	0.144467	0.206206	0.02	0.042608	0.000361	0.004015	0.00291	0.001467	29869	193.37	0	1	1	0.0006947	0.09794	2.9869
230800	2020	232820	佳木斯市	0	0.73	2.2861	7.1e-05	0.61754	0	20304	150850	500937	275	0.01	0.420923	0.136319	0.208127	0	0.0419558	0.00026	0.001516	0.000539	0.001236	30658	189.03	0	1	1	0.0007067		3.0658
230800	2021	232821	佳木斯市	0	0.73	2.40276	5.8e-05	0.5233	0	20841	153000	533231	267	0.01	0.412507	0.172491	0.230626	0	0.0471167	4.4e-05	0.000555	0.021162	0.001646	33150	193.73	0	1	1	0.0007283		3.315
230800	2022	232822	佳木斯市	0.01	0.73	2.27808	5.2e-05	0.4315	0	20580	21000	565525	284	0.01	0.414082	0.173438	0.23434	0	0.0462049	6e-06	0.005345	0.005326	0.005432	34541	193.92	0	1	1	0.0007237		3.4541
230800	2023	232823	佳木斯市	0	0.73	2.23209	4.8e-05	0.65949	0	20705	150346	597819	263	0.01	0.407128	0.208416	0.249597	0.01	0.0493564	0.000426	0.000657	0.000563	0.00052		195.31	0	1	1	0.0007072
230900	2003	232903	七台河市	0	1.41	0.781295	0.0013	0.0087	0	3871	27964	224839	19	0	0.090482	0.383377	0.136064		0.0161803	9.5e-06	8.4e-05	0.009953	0.00022	5719	225.08	0	1	1	0.000497		0.5719
230900	2004	232904	七台河市	0.02	1.42	0.801589	0.001456	0.01048	0	4573	31297	226378	21	0	0.091712	0.406476	0.138837	0	0.0194233	0.018969	0.003104	0.006881	5e-06	6403	221.31	0	1	1	0.000497	0.0025	0.6403
230900	2005	232905	七台河市	2.1	1.42	0.720639	3.3e-05	0.02551	0	4879	37286	228003	22	0	0.123857	0.473949	0.147714	0.02	0.0206441	2.005	0.087163	0.04382	0.000387	7347	223.73	0	1	1	0.000497	0.003	0.7347
230900	2006	232906	七台河市	0	1.43	0.637177	6.4e-05	0.0178	0	4162	38225	229717	29	0.01	0.157089	0.399614	0.141492	2.1	0.0173618	4e-05	0.000485	0.028734	0.000134	8908	224.69	0	1	1	0.000497	0.0031	0.8908
230900	2007	232907	七台河市	0.04	1.44	0.753989	0.000128	0.026	0	4246	40641	231527	49	0.01	0.14855	0.427888	0.149782	0	0.0206211	0.026945	0.008888	0.017345	0.00892	10885	226.71	0	1	1	0.000497	0.0037	1.0885
230900	2008	232908	七台河市	0.01	1.45	0.488052	0.000197	0.02479	0	4519	43000	233439	56	0.01	0.1672	0.418082	0.138712	0.04	0.0209232	0	0.01377	0.013764	0.000587	12610.7	221.68	0	1	1	0.000497	0.00436	1.26107
230900	2009	232909	七台河市	0.04	1.49	0.541213	0.000407	0.02424	0	4338	48026	235460	58	0.01	0.18283	0.392954	0.138123	0.01	0.0227723	7.6e-05	0.035274	0.035344	2.4e-05	13695.8	218.73	0	1	1	0.000497	0.00493	1.36958
230900	2010	232910	七台河市	0.01	1.49	0.537413	0.00139	0.01789	0	3391	87753	237595	57	0.01	0.158934	0.480771	0.136893	0.04	0.0241226	0	0.005111	0.005111	0.004549	15001.9	218.12	0	1	1	0.000497	0.0045	1.50019
230900	2011	232911	七台河市	0.01	1.49	0.579058	0.001337	0.01463	0	3434	55812	239854	70	0.01	0.18816	0.448641	0.141567	0.01	0.0253195	0	0.006983	0.006983	0.003933	16427.5	218.44	0	1	1	0.000497	0.00453	1.64275
230900	2012	232912	七台河市	0.01	1.48	0.58852	0.002826	0.01339	0	3004	59192	242243	85	0.01	0.203601	0.358113	0.161223	0.01	0.0302854	0	0.008251	0.018266	0.000808	17091.9	220.32	0	1	1	0.000497	0.00461	1.70919
230900	2013	232913	七台河市	0.01	1.48	0.831244	0.000655	0.01685	0	2783	58824	244772	101	0.01	0.261887	0.299879	0.17076	0.01	0.0290113	0.004167	0.004399	0.004409	0.000568	18134.1	226.42	0	1	1	0.0004963	0.00298	1.81341
230900	2014	232914	七台河市	0	1.42	0.951137	0.00116	0.02337	0	2473	56063	247450	87	0.01	0.28973	0.29003	0.181953	0.01	0.0310768	0	0.004172	0.002079	0.001858	20067.8	229.15	0	1	1	0.0004977	0.00325	2.00678
230900	2015	232915	七台河市	0.01	1.33	1.08853	0.00077	0.02886	0	2589	52203	250288	83	0.01	0.340748	0.238052	0.185071	0	0.0304859	0	0.008385	0.007795	0.00112	20776	230.04	0	1	1	0.0004949		2.0776
230900	2016	232916	七台河市	0	1.28	1.24095	0.00253	0.03149	0	2631	48257	253296	94	0.01	0.423203	0.168631	0.195727	0.01	0.0323905	0	0.00013	0.00013	0.000112	22071	233.1	0	1	1	0.0005011		2.2071
230900	2017	232917	七台河市	0.01	1.25	1.08484	0.000262	0.03374	0	2646	50631	256487	100	0.01	0.38579	0.257729	0.201554	0	0.0348304	0.0012	0.012644	0.007549	0.005057	23528	233.78	0	1	1	0.0004875	0.0043683	2.3528
230900	2018	232918	七台河市	0.01	1.23	0.984999	0.000511	0.03193	0	2651	51038	265343	93	0.01	0.37661	0.291434	0.204603	0.01	0.0362234	0.001033	0.008552	0.009585	0.000212	24949	234.46	0	1	1	0.0005472		2.4949
230900	2019	232919	七台河市	0	1.22	0.962011	0.000585	0.04081	0	2653	47730	249581	91	0.01	0.591331	0.222724	0.202159	0.01	0.0351915	0	0.000174	0.000143	3.1e-05	26431	229.43	0	1	1	0.0005505		2.6431
230900	2020	232920	七台河市	0	1.22	1.16495	0.000615	0.04024	0	2653	47286	262492	72	0.01	0.606837	0.154018	0.212922	0	0.0392799	2e-07	0.0001	2e-07	0.0001	26315	225.69	0	1	1	0.0006031		2.6315
230900	2021	232921	七台河市	0	1.22	1.34116	0.000627	0.04737	0	2654	46842	275402	52	0.01	0.367422	0.282707	0.221201	0	0.0392696	1e-05	0.000241	0.025463	0.000222	28298	224.13	0	1	1	0.0005932		2.8298
230900	2022	232922	七台河市	0	1.22	1.29406	0.000631	0.04629	0	2654	49918	288313	84	0.01	0.381893	0.273439	0.233312	0	0.0417108	0	1e-06	1e-06	0.002774	29739	221.34	0	1	1	0.0005717		2.9739
230900	2023	232923	七台河市	0	1.21	1.65061	0.000632	0.05825	0	2654	49315	301224	87	0.01	0.393795	0.331347	0.254679	0	0.0432727	5.2e-05	8.4e-05	8.9e-05	4.7e-05	31029	224.17	0	1	1	0.0006198		3.1029
231000	2003	233003	牡丹江市	0	0.67	0.723493	0.002277	0.21159	0	2545	49193	437290	79	0.01	0.093207	0.382383	0.161114		0.0234506	0.000223	6.8e-06	0.000184	1.5e-05	6068	231.53	0	1	1	0.0006192	0.0278	0.6068
231000	2004	233004	牡丹江市	0	0.67	0.639985	0.004124	0.27392	0	2697	56893	438428	101	0.01	0.095515	0.349836	0.160546	0	0.0235996	0.003462	7e-05	1.9e-05	0.000412	6647	230.28	0	1	1	0.0006349	0.0312	0.6647
231000	2005	233005	牡丹江市	0.1	0.66	0.513821	0.005298	0.36155	0	3262	59611	439758	118	0.01	0.123501	0.337023	0.169719	0	0.0246665	0.026561	0.068673	0.039721	0.002658	7335	232.58	0	1	1	0.0006192	0.0349	0.7335
231000	2006	233006	牡丹江市	0.02	0.66	0.505463	0.006268	0.40402	0	3536	58678	441313	144	0.01	0.121362	0.320877	0.173671	0.1	0.0255315	0	0.022557	0.002619	0.000554	8035	233	0	1	1	0.0006349	0.0391	0.8035
231000	2007	233007	牡丹江市	0.04	0.66	0.432526	0.007581	0.45784	0	3763	61401	443132	133	0.01	0.141652	0.322553	0.178209	0.02	0.0293766	0.000582	0.039866	0.018883	0.00042	9251.5	232.55	0	1	1	0.0006192	0.0439	0.92515
231000	2008	233008	牡丹江市	1.2	0.67	0.368977	0.010951	0.46612	0	3940	62705	445262	159	0.01	0.148718	0.333901	0.178119	0.04	0.0306897	1.074	0.092524	1.16	0.000277	10742	229.62	0	1	1	0.0006349	0.05268	1.0742
231000	2009	233009	牡丹江市	0.01	0.67	0.392383	0.011093	0.53492	0	4102	144885	447758	138	0.01	0.163945	0.296276	0.175666	1.2	0.0320134	5e-07	0.010774	0.010725	0.000168	11660.2	230.31	0	1	1	0.0006192	0.0693	1.16602
231000	2010	233010	牡丹江市	0	0.67	0.785552	0.012251	0.54104	0	4370	268303	450684	132	0.01	0.177904	0.31466	0.177967	0.01	0.0344077	1e-05	0.003119	0.003118	0.000939	12806.5	227.33	0	1	1	0.0006349	0.0796	1.28065
231000	2011	233011	牡丹江市	0.02	0.65	0.402599	0.029263	0.53748	0	4528	192708	454119	192	0.01	0.173229	0.373072	0.186598	0	0.0404271	0	0.023835	0.023835	0.000122	14514.8	225.44	0	1	1	0.0006192	0.0919	1.45148
231000	2012	233012	牡丹江市	0.02	0.68	0.377604	0.013183	0.51321	0	3753	191651	458155	193	0.01	0.186392	0.384408	0.179352	0.02	0.0408868	1.9e-05	0.018263	0.000956	8e-05	16703.9	217.53	0	1	1	0.0006349	0.11028	1.67039
231000	2013	233013	牡丹江市	0.06	0.67	0.439535	0.005976	0.50074	0	1278	137273	462906	230	0.01	0.182001	0.412537	0.200809	0.02	0.0461215	0.025624	0.038842	0.04547	0.00144	19320.2	225.57	0	1	1	0.0006192	0.1345	1.93202
231000	2014	233014	牡丹江市	0.04	0.68	0.474962	0.049707	0.48091	0	1429	176700	468504	247	0.01	0.189291	0.368392	0.209848	0.06	0.047887	0.000583	0.036845	0.033139	0.003199	24734.9	229.54	0	1	1	0.0006349	0.14661	2.47349
231000	2015	233015	牡丹江市	0	0.67	0.574911	0.046271	0.51797	0	1278	167473	475115	263	0.01	0.184812	0.243479	0.220412	0.04	0.0488495	0.001005	0.001059	0.001601	0.003876	26673	229.03	0	1	1	0.0006192	0.14133	2.6673
231000	2016	233016	牡丹江市	0.02	0.68	0.525897	0.054093	0.41298	0	1429	165475	482938	255	0.01	0.189319	0.262575	0.234509	0	0.0531935	0.000645	0.019142	0.019397	0.028	28489	229.85	0	1	1	0.0006349	0.17866	2.8489
231000	2017	233017	牡丹江市	0.03	0.68	0.480286	0.057351	0.50151	0	1278	220211	492218	270	0.01	0.212795	0.265232	0.23812	0.02	0.0536361	0.000349	0.024785	0.020756	0.002155	30569	234.7	0	1	1	0.0006192	0.220627	3.0569
231000	2018	233018	牡丹江市	0.01	0.68	0.512982	0.060589	0.49249	0	1429	224138	503491	283	0.01	0.190943	0.239137	0.243569	0.03	0.053964	0.003955	0.008515	0.009876	0.049	32504	239.55	0	1	1	0.0006346	0.23166	3.2504
231000	2019	233019	牡丹江市	0.01	0.68	0.810988	0.000635	0.53272	0	1278	211035	524946	272	0.01	0.250129	0.284888	0.245547	0.01	0.0513353	0.001156	0.006713	0.006786	0.001083	34422	234.19	0	1	1	0.0006409	0.25819	3.4422
231000	2020	233020	牡丹江市	0.01	0.68	0.898286	0.002325	0.68078	0	1429	184309	587887	265	0.01	0.342301	0.191518	0.246042	0.01	0.0518664	0.000242	0.010478	0.009952	0.000767	34133	229.89	0	1	1	0.0006836	0.11021	3.4133
231000	2021	233021	牡丹江市	0	0.68	0.887688	0.003729	0.70451	0	1278	157582	650828	257	0.01	0.305902	0.225837	0.253979	0.01	0.0568064	1e-05	0.000102	0.00144	0.001367	36641	228.96	0	1	1	0.0006856	0.26956	3.6641
231000	2022	233022	牡丹江市	0	0.68	0.839818	0.004428	0.78507	0	1429	150647	713769	259	0.01	0.339873	0.232294	0.256143	0	0.0553158	0	1.1e-05	5e-07	0.000714	37763	228.03	0	1	1	0.0007207	0.29657	3.7763
231000	2023	233023	牡丹江市	0	0.68	1.01283	0.004714	0.75871	0	1278	167091	776710	215	0.01	0.369214	0.250911	0.270527	0	0.0606299	0.000218	0.000728	0.000753	0.000194		231.9	0	1	1	0.0006894
231100	2003	233103	黑河市	0	0.25	1.1277	8.5e-05	0.0165	0	1066	20226	74579	10	0	0.16011	0.237126	0.153331		0.0192159	0.00153	6.1e-05	0.001436	0.014	3869	213.07	0	1	1	0.0006061	0.0039	0.3869
231100	2004	233104	黑河市	0.01	0.25	0.953854	8e-05	0.01979	0	981	19865	82142	11	0	0.154186	0.223184	0.150233	0	0.0192412	3e-05	0.006851	0.000562	3.8e-07		207.14	0	1	1	0.0006061	0.00615
231100	2005	233105	黑河市	0.05	0.25	0.838987	0.001182	0.06288	0	1467	30612	90492	35	0	0.186628	0.137879	0.146342	0.01	0.0177457	0.003646	0.041179	0.028997	0.000369	5041	207	0	1	1	0.0006061	0.006751	0.5041
231100	2006	233106	黑河市	0.94	0.25	0.7176	0.001079	0.07183	0	2424	45704	99711	35	0	0.226206	0.117717	0.150584	0.05	0.0196275	0.8312	0.104109	0.008623	0.000293	5640	207.06	0	1	1	0.0006061	0.0075	0.564
231100	2007	233107	黑河市	0.02	0.25	0.56546	0.001382	0.0717	0	2912	65845	109894	68	0	0.218948	0.129575	0.148926	0.94	0.020946	0.000147	0.01725	0.031431	0.000148	6870	200.3	0	1	1	0.0006061	0.00821	0.687
231100	2008	233108	黑河市	0.06	0.25	0.466844	0.004196	0.08267	0	3077	64204	121142	71	0	0.23308	0.149853	0.154027	0.02	0.0247687	0.034389	0.023211	0.051665	0.00073	8177	194.17	0	1	1	0.0006061	0.01222	0.8177
231100	2009	233109	黑河市	0.01	0.21	0.609376	0.004005	0.08657	0	1164	118631	133571	91	0	0.25948	0.169671	0.160403	0.06	0.0266486	2e-06	0.010176	0.010178	7.4e-05	13291	194	0	1	1	0.0006061	0.0191	1.3291
231100	2010	233110	黑河市	0.05	0.21	0.669336	0.009455	0.09518	0	1794	119829	147307	93	0	0.373833	0.200216	0.161705	0.01	0.0286415	0.0001	0.044734	0.044724	0.000311	16224	192.29	0	1	1	0.0006061	0.0233	1.6224
231100	2011	233111	黑河市	0.02	0.21	0.622413	0.006295	0.0955	0	1596	125675	162491	103	0	0.299438	0.194849	0.164368	0.05	0.0314462	1.2e-05	0.016198	0.016157	0.004071		184.7	0	1	1	0.0006061	0.03152
231100	2012	233112	黑河市	0	0.25	0.638388	0.014415	0.0982	0	1485	125716	179279	114	0	0.297266	0.194774	0.167443	0.02	0.0335658	3.6e-05	0.001125	0.014662	0.00011	18076	182.12	0	1	1	0.0006061	0.03767	1.8076
231100	2013	233113	黑河市	0.03	0.25	0.553641	0.01524	0.10216	0	1692	146925	197845	116	0	0.340026	0.174162	0.175255	0	0.0354697	0.01247	0.01837	0.018365	0.001677	19692.8	185.67	0	1	1	0.0006061	0.040681	1.96928
231100	2014	233114	黑河市	0	0.25	0.786996	0.013098	0.11348	0	1555	167980	218381	117	0	0.335426	0.18651	0.183706	0.03	0.0378471	0.000542	0.004157	0.00254	0.003027	21092.3	186.76	0	1	1	0.0006061	0.04434	2.10923
231100	2015	233115	黑河市	0	0.25	1.11768	0.013255	0.103	0	1563	179865	241102	139	0	0.365237	0.17696	0.20288	0	0.0397803	5e-06	0.002284	0.002101	0.00411	22935	187.19	0	1	1	0.0006061		2.2935
231100	2016	233116	黑河市	0.01	0.25	1.19617	0.011869	0.09871	0	1559	88589	266245	138	0	0.36188	0.17795	0.177199	0	0.0301333	2e-05	0.009508	0.00724	0.017	24474	189.35	0	1	1	0.0006061		2.4474
231100	2017	233117	黑河市	0.01	0.25	1.19709	0.012004	0.10073	0	1561	89293	294075	151	0	0.431904	0.15223	0.181162	0.01	0.0327413	4e-05	0.010874	0.005857	0.000594	26138	192.11	0	1	1	0.0006061	0.08933	2.6138
231100	2018	233118	黑河市	0.01	0.25	1.10426	0.01196	0.10233	0	1560	80583	325965	146	0	0.423828	0.160634	0.189415	0.01	0.0348181	0.001069	0.004407	0.003294	0.023	27957	194.87	0	1	1	0.0006061		2.7957
231100	2019	233119	黑河市	0	0.25	0.864717	0.011974	0.10747	0	1561	76240	355438	176	0	0.385535	0.17386	0.19998	0.01	0.0367651	5.1e-05	0.001211	0.000543	0.000719	29970	201.86	0	1	1	0.0006061		2.997
231100	2020	233120	黑河市	0.01	0.25	0.720789	0.01197	0.11342	0	1560	79274	399727	172	0	0.416884	0.165872	0.199627	0	0.0372441	0.000458	0.011215	0.010185	0.001488	30899	196.56	0	1	1	0.0006061	0.06357	3.0899
231100	2021	233121	黑河市	0.05	0.25	0.752045	0.011971	0.11936	0	1560	82307	444016	167	0	0.408821	0.172488	0.206546	0.01	0.0409705	0.034049	0.016651	0.004247	0.001377	33477	197.73	0	1	1	0.0006061	0.09756	3.3477
231100	2022	233122	黑河市	0	0.25	0.759399	0.011971	0.12531	0	1560	86507	488305	176	0	0.422292	0.170841	0.211309	0.05	0.0412441	1.3e-05	0.000742	0.000103	0.000245	34550	200.4	0	1	1	0.0003611	0.10377	3.455
231100	2023	233123	黑河市	0	0.25	0.868859	0.011971	0.12753	0	1560	75674	532594	173	0	0.439762	0.180474	0.218217	0	0.0424312	0.002	0.000411	0.00034	0.002071		204.02	0	1	1	0.0006061
231200	2003	233203	绥化市	0	1.59	0.77891	0.001352	0.04398	0	1892	30100	486584	52	0	0.087263	0.321597	0.113184		0.0143559	1.3e-06	0.000556	6.5e-05	0.026	4059	215.28	0	1	1	0.0004595	0.0078	0.4059
231200	2004	233204	绥化市	0	1.6	0.647958	0.00154	0.0535	0	2231	53900	490115	57	0	0.092862	0.213565	0.114715	0	0.0151584	4.7e-05	0.00014	0.006956	3e-05	5154	214.41	0	1	1	0.0004615	0.08	0.5154
231200	2005	233205	绥化市	0.04	1.61	0.662869	0.00187	0.07972	0	2893	89493	494054	94	0.01	0.130906	0.190539	0.110408	0	0.0149812	1.8e-05	0.04014	0.059388	0.000252	4987	204.66	0	1	1	0.0004635	0.0836	0.4987
231200	2006	233206	绥化市	0.03	1.63	0.610026	0.002443	0.08112	0	2365	122000	498450	97	0.01	0.14852	0.17247	0.110847	0.04	0.0153372	0.007532	0.023872	0.024695	0.000153	5534	206.96	0	1	1	0.0004663	0.0097	0.5534
231200	2007	233207	绥化市	0.02	1.65	0.515972	0.00313	0.09488	0	2456	89000	503362	73	0.01	0.175435	0.152999	0.112504	0.03	0.0165628	0.00011	0.018775	0.024807	1.9e-05	6081	206.66	0	1	1	0.00047	0.00526	0.6081
231200	2008	233208	绥化市	0.04	1.65	0.442143	0.0031	0.09389	0	2568	6674	508856	80	0.01	0.204128	0.143409	0.117298	0.02	0.0185479	0.000526	0.038084	0.03849	0.000346	7109	206.61	0	1	1	0.0004736	0.0215	0.7109
231200	2009	233209	绥化市	0.02	1.66	0.391287	0.003241	0.09401	0	2633	6930	515007	82	0.01	0.206795	0.154162	0.123458	0.04	0.0208706	0	0.016775	0.016775	0.023	9442	205.69	0	1	1	0.0004796	0.0216	0.9442
231200	2010	233210	绥化市	0.03	1.68	0.411592	0.003325	0.10036	0	2778	7653	521902	93	0.01	0.25623	0.258734	0.120455	0.02	0.0216753	0	0.032983	0.032982	0.000285	11056	201.42	0	1	1	0.0004868	0.0076	1.1056
231200	2011	233211	绥化市	0.01	1.67	0.378268	0.013006	0.10137	0	3282	9183	529643	112	0.01	0.217678	0.211755	0.112572	0.03	0.0231809	0	0.009041	0.008652	0.011		195.11	0	1	1	0.0004956	0.0097
231200	2012	233212	绥化市	0.02	1.59	0.380524	0.015	0.1063	0	3849	15172	538345	168	0.01	0.240591	0.217772	0.116933	0.01	0.0270182	8.2e-05	0.014784	0.001315	0.00074	15300	191.6	0	1	1	0.0005063	0.02179	1.53
231200	2013	233213	绥化市	0.09	1.6	0.420062	0.0193	0.1021	0	4175	28490	548144	242	0.01	0.232889	0.233639	0.120898	0.02	0.026279	0.01249	0.076069	0.07394	0.001367	17684	194.53	0	1	1	0.0005204	0.00052	1.7684
231200	2014	233214	绥化市	0.02	1.59	0.575386	0.023109	0.10105	0	4185	47008	559198	292	0.01	0.24384	0.212043	0.119431	0.09	0.0283315	0.000136	0.017775	0.017485	0.000623	19111.1	192.5	0	1	1	0.0005384	0.00057	1.91111
231200	2015	233215	绥化市	0.02	1.57	0.601568	0.025721	0.09894	0	4487	54000	571695	329	0.02	0.261796	0.168781	0.121334	0.02	0.0271838	8e-05	0.021072	0.016745	0.000516	20664	193.2	0	1	1	0.0005609		2.0664
231200	2016	233216	绥化市	0.03	1.57	0.669991	0.028067	0.10466	0	4811	42687	585854	391	0.02	0.288575	0.146903	0.130351	0.02	0.0296805	2e-05	0.025026	0.022264	0.003881	22060	195.61	0	1	1	0.0005894		2.206
231200	2017	233217	绥化市	0	1.56	0.692514	0.030457	0.11037	0	5158	31374	601936	453	0.02	0.312559	0.134189	0.140932	0.03	0.0329403	2e-05	0.004472	0.002337	0.04	23450	199.08	0	1	1	0.0006254	0.038	2.345
231200	2018	233218	绥化市	0.01	1.56	0.668536	0.000758	0.11609	0	5530	20061	624654	515	0.02	0.311539	0.143977	0.147043	0	0.0341702	0.004274	0.001597	0.005659	0.00729	25023	202.55	0	1	1	0.0006783		2.5023
231200	2019	233219	绥化市	0.02	1.56	0.952241	0.000759	0.11201	0	5929	189126	610136	402	0.02	0.427763	0.137779	0.155356	0.01	0.0338462	0.000702	0.018802	0.011819	0.007685	26760	195.53	0	1	1	0.0007128		2.676
231200	2020	233220	绥化市	0.03	1.56	1.06834	0.000555	0.11118	0	6357	182227	669626	360	0.02	0.43971	0.133461	0.164086	0.02	0.0331241	0.000146	0.025503	0.020524	0.005125	27546	190.3	0	1	1	0.0007383		2.7546
231200	2021	233221	绥化市	0.03	1.56	1.08243	0.000737	0.11104	0	6815	175328	729115	317	0.02	0.333417	0.16085	0.171142	0.03	0.0351195	0.013007	0.013338	0.010652	5.9e-05	29700	190.49	0	1	1	0.0007586		2.97
231200	2022	233222	绥化市	0	1.56	1.02333	0.000571	0.11102	0	7306	236289	788604	419	0.02	0.372235	0.128953	0.165252	0.03	0.0360952	3e-05	6.3e-05	9.1e-05	0.003044	27944	191.13	0	1	1	0.000736		2.7944
231200	2023	233223	绥化市	0	1.55	1.12886	0.000719	0.11101	0	7833	250000	848094	432	0.02	0.415691	0.185292	0.177687	0	0.0401773	0.000434	0.002578	0.0009	0.002112		193.41	0	1	1	0.0007444
310000	2003	312003	上海市	0	21.16	2.10662	0.585022	3.78517	0.23	63861	2400000	12000000	1099	0.55	0.1764	0.815573	0.290706		0.167977	1e-05	5e-05	0.003263	0.000405	14867.5	245.96	1	1	1	0.5272	0.7603	1.48675
310000	2004	312004	上海市	0.01	21.33	2.00959	0.654073	4.15701	0.25	68710	3100000	12000000	1306	0.69	0.187334	0.80227	0.301439	0	0.187328	6.5e-05	0.006953	0.000269	5.8e-07	16682.8	245.58	1	1	1	0.6571	0.8505	1.66828
310000	2005	312005	上海市	0.06	20.79	1.83502	0.684965	4.4262	0.29	71303	4500000	12000000	1444	0.78	0.179845	0.86094	0.324585	0.01	0.194531	0.001298	0.058318	0.016875	8.5e-05	18645	248.6	1	1	1	0.82	0.9012	1.8645
310000	2006	312006	上海市	0.01	21.58	1.79464	0.710689	4.66333	0.32	75184	5100000	12000000	1610	0.87	0.173211	0.877758	0.338931	0.06	0.215229	7.2e-05	0.008723	0.020674	0.00088	20667.9	248.69	1	1	1	1.0194	0.9684	2.06679
310000	2007	312007	上海市	0.03	21.75	1.78113	0.791954	4.84873	0.36	78108	3600000	13000000	1776	1	0.17899	0.950864	0.353738	0.01	0.235451	7.5e-06	0.025726	0.013017	0.001234	23622.7	250.76	1	1	1	1.2828	1.021	2.36227
310000	2008	312008	上海市	0.02	21.94	1.76419	1	5.02899	0.41	84347	7800000	13000000	1881	1.2	0.189363	0.909338	0.365049	0.03	0.26166	6.8e-05	0.02283	0.022762	0.00033	26674.9	251.84	1	1	1	1.5383	1.1006	2.66749
310000	2009	312009	上海市	0.05	22.09	1.97283	1.1	5.12809	0.46	76821	8100000	13000000	2106	1.3	0.198695	0.849697	0.379557	0.02	0.272913	0.008548	0.045263	0.049448	0.000268	28837.8	257.62	1	1	1	1.9445	1.2361	2.88378
310000	2010	312010	上海市	0.19	22.28	1.98964	1.1	5.15661	0.52	80835	9700000	13000000	2362	1.4	0.192409	0.870022	0.394035	0.05	0.302758	0.034836	0.154181	0.177975	5e-05	31838.1	255.6	1	1	1	2.3189	2.2432	3.18381
310000	2011	312011	上海市	1.6	22.39	1.93777	1.3	5.11283	0.58	93135	4200000	13000000	2621	1.6	0.203946	0.876101	0.402537	0.19	0.314696	1.443	0.130268	1.561	0.000165	36230.5	256.4	1	1	1	2.9945	2.3079	3.62305
310000	2012	312012	上海市	0.41	22.51	1.80787	1.5	5.06596	0.66	94190	4500000	14000000	3008	1.8	0.207317	0.894763	0.440309	1.6	0.371417	0.385412	0.028791	0.143999	0.005637	40188.3	258.82	1	1	1	3.375	2.5094	4.01883
310000	2013	312013	上海市	0.55	22.59	2.0534	1.7	5.04771	0.74	91352	4900000	14000000	3201	2	0.209637	0.907455	0.450041	0.41	0.380646	0.50472	0.049132	0.542006	0.000397	44878.3	260.64	1	1	1	3.5045	2.59907	4.48783
310000	2014	312014	上海市	1.1	22.69	2.03311	1.8	5.06644	0.84	90128	6000000	14000000	3293	2.2	0.208906	0.931372	0.472208	0.55	0.409146	1.064	0.084174	1.137	0.001119	48841.4	263.31	1	1	1	3.7645	2.6818	4.88414
310000	2015	312015	上海市	0.97	22.76	2.12499	1.8	5.11623	0.94	90093	5300000	15000000	3260	2.5	0.246445	0.891455	0.489257	1.1	0.432321	0.873637	0.096948	0.951566	0.002474	52961.9	266.34	1	1	1	4.1916	2.75694	5.29619
310000	2016	312016	上海市	0.9	22.76	1.91582	1.9	5.14683	1.1	90105	5700000	15000000	3156	2.8	0.245538	0.925883	0.535	0.97	0.498432	0.794914	0.101631	0.868097	0.00388	57691.7	268.39	1	1	1	4.9197	2.96206	5.76917
310000	2017	312017	上海市	0.97	22.76	1.99748	1.7	5.14917	1.2	90101	5700000	15000000	3299	3.1	0.246389	0.880047	0.543303	0.9	0.522918	0.817011	0.157578	0.934461	0.004721	62595.7	267.82	1	1	1	5.5409	3.28453	6.25957
310000	2018	312018	上海市	1.4	22.76	2.06757	1.7	5.17796	1.4	90102	5800000	16000000	3722	3.5	0.255556	0.851119	0.568632	0.97	0.54954	1.087	0.276765	1.315	0.004402	68033.6	268.58	1	1	1	6.1223	3.39769	6.80336
310000	2019	312019	上海市	1.4	22.76	1.93479	1.9	5.26585	1.5	90102	5800000	16000000	4008	3.9	0.214364	0.876006	0.601186	1.4	0.574196	1.067	0.293226	1.315	0.045	73615.3	271.44	1	1	1	7.1785	3.61405	7.36153
310000	2020	312020	上海市	0.87	22.76	2.01522	2	5.40693	1.7	90102	6100000	16000000	4204	4.3	0.209351	0.869687	0.607657	1.4	0.578089	0.787545	0.080675	0.82439	0.044	76437.3	271.9	1	1	1	8.5034	2.36057	7.64373
310000	2021	312021	上海市	0	22.76	2.04235	2	5.48733	1.9	90102	6300000	17000000	4399	4.8	0.195091	0.921828	0.637558	0.87	0.61803	0.001634	0.001451	0.000236	0.000106	82428.9	272.05	1	1	1	8.8134	2.93822	8.24289
310000	2022	312022	上海市	0.05	22.76	2.16094	2	5.548	2.1	90102	6700000	18000000	4433	5.4	0.210359	0.809971	0.642478	0	0.613791	0.034711	0.012296	0.025221	6.7e-05	84034	272.9	1	1	1	7.6717	1.88162	8.4034
310000	2023	312023	上海市	0.16	22.76	2.24288	2.1	5.72443	2.4	90102	7200000	18000000	4594	6	0.204124	0.862426	0.671968	0.05	0.657865	0.101167	0.062116	0.126964	0.036	89476.7	273.98	1	1	1	7.5387	3.26428	8.94767
320100	2003	322103	南京市	0	8.69	2.14126	0.221022	3.33648	0.23	14805	540613	2800000	300	0.12	0.098506	0.878931	0.2021		0.0666214	0.002243	0.001374	1e-05	0.000463	10194	239.22	1	1	1	0.1134	0.22239	1.0194
320100	2004	322104	南京市	0	8.87	2.12675	0.256636	4.91463	0.23	16938	373143	3000000	384	0.14	0.100353	0.886284	0.211298	0	0.0728697	0.002028	0.000158	3.4e-06	0.000222	11602.3	239.06	1	1	1	0.1518	0.2806	1.16023
320100	2005	322105	南京市	0.01	9.05	1.84669	0.141778	5.61102	0.23	18073	568477	3100000	454	0.17	0.095952	0.912353	0.222258	0	0.0769261	0.002778	0.007603	0.008607	0.000321	14997.5	242.58	1	1	1	0.1856	0.319	1.49975
320100	2006	322106	南京市	0.03	9.23	1.83797	0.151911	6.20779	0.23	18392	687373	3300000	488	0.18	0.094622	0.938954	0.232206	0.01	0.0833906	0.000819	0.024784	0.028472	1e-06	17537.7	244.05	1	1	1	0.2588	0.37	1.75377
320100	2007	322107	南京市	0.01	9.38	1.84121	0.196253	6.79924	0.23	19861	711835	3400000	578	0.21	0.104436	0.96282	0.238275	0.03	0.0887729	8.7e-06	0.007728	0.006065	2e-05	20317.2	244.77	1	1	1	0.2914	0.448888	2.03172
320100	2008	322108	南京市	0.02	9.49	1.89979	0.237203	7.25019	0.23	24252	808952	3600000	655	0.25	0.107196	0.955258	0.250114	0.01	0.0975007	0.002736	0.021535	0.022613	0.002052	22337	246.53	1	1	1	0.409	0.49702	2.2337
320100	2009	322109	南京市	0.04	9.57	2.14269	0.239199	7.73394	0.23	26014	872602	3800000	801	0.28	0.10904	0.94199	0.258659	0.02	0.1018	0.000579	0.034383	0.034807	1e-05	24677.9	247.26	1	1	1	0.5621	0.551991	2.46779
320100	2010	322110	南京市	0.06	9.6	2.02408	0.281601	7.93405	0.23	30592	917974	4000000	931	0.33	0.105675	0.956877	0.265729	0.04	0.11174	0.004051	0.052654	0.05514	0.000762	27383	248.06	1	1	1	0.6943	0.63655	2.7383
320100	2011	322111	南京市	0.24	9.66	1.81142	0.356588	8.08498	0.23	35755	971671	4200000	1002	0.37	0.108405	0.953162	0.280158	0.06	0.121257	0.095465	0.148522	0.236757	0.000109	31099.8	248.71	1	1	1	0.9468	0.71805	3.10998
320100	2012	322112	南京市	0.16	9.69	1.70996	0.413031	6.51948	0.23	38941	1100000	4400000	1153	0.42	0.106873	0.952394	0.301242	0.24	0.14045	0.094385	0.062946	0.071903	0.005601	35091.9	249.83	1	1	1	1.2709	0.79505	3.50919
320100	2013	322113	南京市	0.14	9.76	1.72135	0.403262	8.0745	0.23	29099	1200000	4600000	992	0.48	0.106207	0.976965	0.319619	0.16	0.152239	0.101812	0.034759	0.128952	0.016	39115	250.83	1	1	1	1.6263	0.867401	3.9115
320100	2014	322114	南京市	0.25	9.85	1.77179	0.32907	8.05338	0.23	30904	1200000	4800000	1042	0.55	0.104436	0.980769	0.33695	0.14	0.167993	0.172565	0.074102	0.235698	0.000739	42568	253.06	1	1	1	1.897	0.94193	4.2568
320100	2015	322115	南京市	0.48	9.91	1.87411	0.333459	8.12619	0.23	32391	1200000	5100000	1082	0.63	0.10756	0.975573	0.349173	0.25	0.175641	0.353821	0.123001	0.457759	0.001301	46104	253.93	1	1	1	2.1577	0.99927	4.6104
320100	2016	322116	南京市	0.37	9.98	2.06429	0.347937	8.27773	0.23	33950	1300000	5300000	1115	0.72	0.111762	0.973386	0.367328	0.48	0.187551	0.322027	0.043094	0.348608	0.007057	49997	254.97	1	1	1	2.5569	1.06573	4.9997
320100	2017	322117	南京市	0.33	10.04	2.098	0.367273	7.2154	0.23	35583	1400000	5600000	1124	0.82	0.115585	0.939312	0.383902	0.37	0.20027	0.255548	0.075088	0.310544	0.002862	54538	256.44	1	1	1	3.1798	1.13833	5.4538
320100	2018	322118	南京市	0.33	10.1	2.2154	0.385339	7.26728	0.23	37295	1400000	6100000	1284	0.94	0.119553	0.959092	0.402134	0.33	0.218975	0.279316	0.054943	0.311508	0.02	59308	257.91	1	1	1	4.0353	1.21859	5.9308
320100	2019	322119	南京市	0.44	10.15	2.39369	0.410058	8.77894	0.23	39088	1500000	6200000	1308	1.1	0.118172	0.952933	0.427494	0.33	0.24073	0.383519	0.060778	0.410546	0.034	64372	258.97	1	1	1	4.584	1.27188	6.4372
320100	2020	322120	南京市	0.27	10.2	2.53707	0.447959	9.18141	0.23	40968	1600000	6500000	1317	1.2	0.118411	0.933365	0.436966	0.44	0.247299	0.229771	0.045149	0.253594	0.021	67553	259.81	1	1	1	4.9774	0.867037	6.7553
320100	2021	322121	南京市	0	10.25	2.61182	0.489074	7.57385	0.23	42939	1700000	6800000	1326	1.4	0.111135	0.951472	0.450818	0.27	0.263151	0.002335	0.002134	0.000655	0.000756	73593.2	259.19	1	1	1	4.8016	1.08306	7.35932
320100	2022	322122	南京市	0.03	10.3	2.85081	0.533647	7.77677	0.23	45003	1900000	7200000	1354	1.6	0.108156	0.852087	0.456841	0	0.263736	0.015942	0.014712	0.008132	0.000364	76643	259.39	1	1	1	4.2266	1.0329	7.6643
320100	2023	322123	南京市	0.1	10.34	3.09408	0.581942	7.9941	0.23	47167	2000000	7500000	1422	1.8	0.105545	0.88105	0.466272	0.03	0.26874	0.028431	0.070943	0.073386	0.026	79858	261.3	1	1	1	3.9179		7.9858
320200	2003	322203	无锡市	0.01	9.24	0.75521	0.270057	0.48366	0.3	7097	409534	4000000	275	0.14	0.05752	0.954113	0.191651		0.0634139	0.007841	0.002609	0.000293	0.000164	11647	235.39	0	1	1	0.0465	0.17654	1.1647
320200	2004	322204	无锡市	0	9.34	0.767	0.209567	0.61279	0.3	7431	528540	4100000	302	0.18	0.060895	0.945368	0.205879	0.01	0.0699394	4.5e-05	0.000225	0.016301	0.000411	13587.7	237	0	1	1	0.0592	0.2207	1.35877
320200	2005	322205	无锡市	0.02	9.46	0.778485	0.200713	0.79174	0.3	8430	526167	4300000	361	0.24	0.065208	0.993411	0.210717	0	0.0757647	6.1e-06	0.016975	0.01687	0.000276	16005.2	235.09	0	1	1	0.0796	0.2638	1.60052
320200	2006	322206	无锡市	0.03	9.56	0.797651	0.275228	0.91327	0.3	10330	593536	4500000	431	0.29	0.064655	1.03508	0.222155	0.02	0.0820448	0.002993	0.02771	7.5e-05	0.001483	18189.3	236.26	0	1	1	0.1104	0.3033	1.81893
320200	2007	322207	无锡市	0.01	9.64	0.802749	0.277177	1.02561	0.3	10769	662752	4600000	504	0.36	0.070187	1.1099	0.232829	0.03	0.0907649	0.000112	0.013166	0.014515	0.011	20898	237.69	0	1	1	0.162	0.335076	2.0898
320200	2008	322208	无锡市	0.03	9.7	0.842871	0.316651	1.09553	0.3	11475	721292	4800000	592	0.43	0.076702	1.07802	0.244494	0.01	0.0990458	0.005887	0.019231	0.024937	0.026	23263.3	238.51	0	1	1	0.2591	0.36824	2.32633
320200	2009	322209	无锡市	0.03	9.73	1.05443	0.320308	1.12715	0.3	10798	763207	5000000	677	0.5	0.081257	1.02539	0.249986	0.03	0.105783	0.000235	0.031738	0.030431	0.02	25026.7	238.42	0	1	1	0.4588	0.431048	2.50267
320200	2010	322210	无锡市	0.03	10.08	1.0634	0.330007	1.09629	0.3	12641	826408	5200000	767	0.58	0.084353	1.04749	0.260512	0.03	0.11523	0.000337	0.027469	0.027718	0.000121	27750	239.99	0	1	1	0.6689	0.50673	2.775
320200	2011	322211	无锡市	0.13	10.11	1.00048	0.35048	1.08347	0.3	14132	884034	5400000	881	0.68	0.086142	1.03767	0.278395	0.03	0.126534	0.016904	0.11153	0.127877	0.000131	31638.1	241.26	0	1	1	0.9797	0.57252	3.16381
320200	2012	322212	无锡市	0.07	10.16	0.986639	0.400953	1.09363	0.3	15519	975009	5600000	902	0.8	0.085703	1.01452	0.295498	0.13	0.141405	0.006295	0.066597	0.032867	0.001018	35662.6	242.34	0	1	1	1.3018	0.63653	3.56626
320200	2013	322213	无锡市	0.05	10.21	1.0047	0.333886	1.11391	0.3	13950	1000000	5800000	815	0.93	0.088163	0.999187	0.310669	0.07	0.150137	0.004112	0.041415	0.044888	0.003998	38420	243.18	0	1	1	1.31	0.699357	3.842
320200	2014	322214	无锡市	0.04	10.31	1.05659	0.290438	1.1424	0.3	15323	966620	6100000	833	1.1	0.091167	1.02667	0.32267	0.05	0.157219	0.013525	0.023327	0.034682	0.00152	41731	245.72	0	1	1	1.4947	0.75737	4.1731
320200	2015	322215	无锡市	0.07	10.4	1.09556	0.320219	1.15341	0.3	15466	945682	6300000	844	1.3	0.096482	1.0099	0.333821	0.04	0.161605	0.018243	0.0528	0.065165	0.002832	45129	246.51	0	1	1	1.6213	0.80433	4.5129
320200	2016	322216	无锡市	0.05	10.46	1.12735	0.341273	1.13732	0.3	15523	983853	6600000	800	1.5	0.094176	1.00881	0.351537	0.07	0.170768	0.009517	0.043488	0.049125	0.001312	48628	248.89	0	1	1	2.2358	0.858603	4.8628
320200	2017	322217	无锡市	0.07	10.52	1.05581	0.367545	1.12689	0.3	15545	1100000	6900000	880	1.7	0.093958	0.941619	0.36287	0.05	0.179591	0.01517	0.057129	0.067579	0.006919	52659.2	248.97	0	1	1	1.8549	0.917934	5.26592
320200	2018	322218	无锡市	0.06	10.58	1.04659	0.369133	1.06027	0.33	15554	1100000	7300000	964	2	0.092313	0.958653	0.379225	0.07	0.190578	0.015287	0.048325	0.056322	0.005154	56989	249.05	0	1	1	2.0957	0.981768	5.6989
320200	2019	322219	无锡市	0.14	10.64	1.14383	0.361977	1.19976	0.33	15557	1000000	7500000	999	2.4	0.09429	0.927348	0.389959	0.06	0.197745	0.054637	0.087612	0.129787	0.012	61915	249.43	0	1	1	2.4835	1.02369	6.1915
320200	2020	322220	无锡市	0.14	10.69	1.22183	0.355139	1.33163	0.33	15558	1100000	7800000	988	2.8	0.098224	0.885325	0.39985	0.14	0.205812	0.077502	0.057642	0.129887	0.005257	64714.2	250.42	0	1	1	3.113	0.60102	6.47142
320200	2021	322221	无锡市	0.01	10.74	1.22755	0.348972	1.53216	0.33	15559	1200000	8100000	978	3.2	0.096964	0.884156	0.408014	0.14	0.222707	0.00434	0.007679	0.001364	0.000453	70482.5	249.24	0	1	1	2.8078	0.880009	7.04825
320200	2022	322222	无锡市	0.01	10.79	1.31722	0.343401	2.01295	0.33	15559	1300000	8400000	1024	3.8	0.09197	0.829803	0.412763	0.01	0.225547	0.002405	0.008502	0.002062	0.000554	73332	248.87	0	1	1	2.5692	0.792098	7.3332
320200	2023	322223	无锡市	0.03	10.84	1.44209	0.338363	2.01698	0.33	15559	1500000	8600000	1039	4.4	0.089945	0.859899	0.425469	0.01	0.23444	0.015021	0.010444	0.017047	0.008419	76644	249.51	0	1	1	2.593	1.2712	7.6644
320300	2003	322303	徐州市	0	8.07	0.509406	0.034095	0.71811	0.03	7215	189577	3900000	137	0.03	0.060967	0.614359	0.144151		0.0289346	0.000152	0.000156	2.2e-05	1.4e-05	8954	219.86	0	1	1	0.0197	0.05836	0.8954
320300	2004	322304	徐州市	0	8.14	0.43359	0.032917	0.86858	0.03	7422	235039	3900000	143	0.03	0.061125	0.637623	0.14694	0	0.0307781	5.4e-06	2e-05	0.017126	3e-07	9839.65	221.44	0	1	1	0.0256	0.0801	0.983965
320300	2005	322305	徐州市	0.01	8.22	0.405213	0.026056	0.92666	0.03	10038	240117	3900000	155	0.04	0.072761	0.626119	0.145594	0	0.0320996	6.6e-06	0.008627	0.037017	3e-06	11185.3	220.31	0	1	1	0.0353	0.0994	1.11853
320300	2006	322306	徐州市	0.02	8.3	0.395479	0.024433	1.0414	0.03	10135	280297	3900000	220	0.05	0.075106	0.66192	0.130282	0.01	0.032907	7.2e-05	0.020687	0.000347	0.000147	12836.7	221.82	0	1	1	0.0438	0.1149	1.28367
320300	2007	322307	徐州市	0.01	8.36	0.407382	0.04429	1.13774	0.03	11813	291598	3900000	262	0.05	0.087783	0.680827	0.134784	0.02	0.0357477	2.5e-05	0.006049	0.003311	0.001212	14875.4	223.55	0	1	1	0.0639	0.134415	1.48754
320300	2008	322308	徐州市	0	8.41	0.396829	0.058251	1.20094	0.03	15754	285723	3900000	369	0.08	0.099158	0.632267	0.141523	0.01	0.0387885	6e-05	0.002446	0.00225	0.000254	13205.3	225.16	0	1	1	0.1055	0.15383	1.32053
320300	2009	322309	徐州市	0.02	8.51	0.473845	0.069781	1.25676	0.03	15624	411905	3900000	517	0.1	0.10733	0.64063	0.14789	0	0.0421083	0.000504	0.022581	0.022815	0.0004	14797.9	225.85	0	1	1	0.1728	0.179091	1.47979
320300	2010	322310	徐州市	0.06	8.64	0.488231	0.10133	1.20103	0.03	26206	442652	3900000	601	0.14	0.110708	0.682046	0.166634	0.02	0.0501422	0.001608	0.055809	0.056226	0.000285	16762	229.08	0	1	1	0.2571	0.20494	1.6762
320300	2011	322311	徐州市	0.05	8.67	0.488461	0.146569	1.31747	0.03	25281	491997	3900000	682	0.18	0.127896	0.700987	0.177051	0.06	0.0568788	0.000586	0.047191	0.047772	0.0001	19206.1	230.13	0	1	1	0.4095	0.24573	1.92061
320300	2012	322312	徐州市	0.03	8.8	0.509695	0.170021	1.15815	0.03	21821	539106	3900000	761	0.23	0.131965	0.691937	0.189573	0.05	0.0634759	0.000408	0.032661	0.034142	0.000511	21715.7	230.95	0	1	1	0.4752	0.27526	2.17157
320300	2013	322313	徐州市	0.03	8.94	0.532213	0.150047	1.36313	0.03	30960	588980	3900000	727	0.3	0.134273	0.709934	0.200766	0.03	0.0684729	0.000607	0.028653	0.028652	0.000957	22015	231.75	0	1	1	0.5582	0.308715	2.2015
320300	2014	322314	徐州市	0.05	8.7	0.54892	0.165786	1.37239	0.04	22927	581325	3800000	751	0.38	0.13333	0.71366	0.215714	0.03	0.0798515	0.000535	0.053582	0.052753	0.000935	24079.6	234.67	0	1	1	0.5914	0.35666	2.40796
320300	2015	322315	徐州市	0.04	8.75	0.577062	0.142788	1.37631	0.04	24509	568207	3800000	756	0.47	0.141443	0.70526	0.221893	0.05	0.0787323	0.008088	0.029889	0.036857	0.00072	26218.7	235.75	0	1	1	0.6277	0.40053	2.62187
320300	2016	322316	徐州市	0.05	8.81	0.623259	0.150574	1.40825	0.04	24009	607779	3700000	762	0.58	0.137383	0.6467	0.235556	0.04	0.0878008	0.001627	0.045111	0.04444	0.000243	28421.3	237.05	0	1	1	0.7953	0.45155	2.84213
320300	2017	322317	徐州市	0.08	8.86	0.631733	0.165991	1.29254	0.04	24163	631665	3600000	811	0.71	0.125241	0.606328	0.236139	0.05	0.0915841	0.002883	0.072415	0.072436	0.009786	30986.8	237.875	0	1	1	0.951	0.509777	3.09868
320300	2018	322318	徐州市	0.05	8.92	0.72721	0.189848	1.30699	0.05	24115	675499	3500000	904	0.86	0.130397	0.597386	0.245347	0.08	0.096019	0.006093	0.040262	0.036397	0.000893	33585.9	238.7	0	1	1	1.2766	0.575844	3.35859
320300	2019	322319	徐州市	0.04	8.98	0.814721	0.208997	1.34722	0.05	24130	689407	3700000	961	1	0.123369	0.530849	0.255442	0.05	0.0992981	0.006431	0.037613	0.036458	0.007585	36214.6	239.57	0	1	1	1.5949	0.633714	3.62146
320300	2020	322320	徐州市	0.02	9.04	0.949738	0.225292	1.45857	0.05	24125	756982	3900000	982	1.2	0.1309	0.502846	0.254928	0.04	0.0998771	0.005216	0.016148	0.015116	0.006248	37523	239.28	0	1	1	1.6072	0.275488	3.7523
320300	2021	322321	徐州市	0.02	9.1	1.00142	0.241921	2.27574	0.05	24127	824557	4100000	1004	1.5	0.12374	0.534961	0.266341	0.02	0.107631	0.003069	0.012831	0.000211	0.000421	40842.4	239.08	0	1	1	1.6995	0.519623	4.08424
320300	2022	322322	徐州市	0	9.16	1.10414	0.258827	2.6115	0.06	24126	923575	4300000	1045	1.7	0.121993	0.501471	0.263995	0.02	0.109555	0.001108	0.001668	0.002089	0.000276	42610	238.26	0	1	1	1.4643	0.333326	4.261
320300	2023	322323	徐州市	0.02	9.22	1.21813	0.275955	2.44271	0.06	24127	1000000	4500000	1073	2	0.118752	0.516569	0.274461	0	0.114765	0.003207	0.014794	0.013224	0.004776	44796	240.98	0	1	1	1.2578		4.4796
320400	2003	322403	常州市	0	7.91	0.886535	0.085522	0.53059	0.03	5437	252039	2200000	161	0.08	0.069944	0.898871	0.168004		0.0385883	0.000698	0.000828	0.002408	4e-05	11307	230.16	0	1	1	0.0344	0.08171	1.1307
320400	2004	322404	常州市	0.02	7.98	0.868954	0.058	0.73862	0.03	5647	287968	2300000	194	0.1	0.068746	0.890012	0.175518	0	0.0424271	0.010497	0.01316	0.00315	1.5e-06	12868.1	230.86	0	1	1	0.0375	0.1041	1.28681
320400	2005	322405	常州市	0.02	8.04	0.854139	0.07312	0.8388	0.03	6032	314300	2400000	207	0.11	0.075072	0.970818	0.174527	0.02	0.0442437	1.7e-05	0.01686	0.000535	0.033	14589.2	229.24	0	1	1	0.0482	0.1283	1.45892
320400	2006	322406	常州市	0.03	8.11	0.859276	0.125145	0.94235	0.03	6855	351615	2500000	255	0.13	0.074992	1.01007	0.176825	0.02	0.0490969	0.000188	0.028358	0.012146	8.3e-05	16650	231.08	0	1	1	0.0624	0.1502	1.665
320400	2007	322407	常州市	0.02	8.15	0.845228	0.183481	1.02454	0.03	8083	398915	2700000	302	0.16	0.082198	1.02219	0.189392	0.03	0.0565946	5.6e-05	0.014469	0.010704	0.000324	19089	232.59	0	1	1	0.0704	0.174695	1.9089
320400	2008	322408	常州市	0.01	8.18	0.840825	0.204002	1.05225	0.03	11320	447780	2800000	348	0.2	0.084768	0.992014	0.19512	0.02	0.0614313	1.7e-05	0.005242	0.005223	1e-05	21233.7	233.88	0	1	1	0.154	0.20371	2.12337
320400	2009	322409	常州市	0.1	8.21	0.997635	0.258199	1.25468	0.03	11148	475696	3000000	425	0.22	0.086807	0.986936	0.206172	0.01	0.0664698	0.004767	0.098606	0.101987	0.00042	23391.7	234.98	0	1	1	0.2302	0.234281	2.33917
320400	2010	322410	常州市	0.07	8.25	0.989091	0.267	1.04255	0.03	13110	504759	3100000	501	0.26	0.09243	1.01684	0.216081	0.1	0.0741723	0.010182	0.060003	0.064651	0.000456	25875	237.17	0	1	1	0.379	0.280243	2.5875
320400	2011	322411	常州市	0.06	8.3	0.951232	0.305238	1.04648	0.03	15644	539640	3300000	560	0.29	0.101037	0.969785	0.227527	0.07	0.082731	0.005137	0.050806	0.05494	0.00015	29558.9	238.28	0	1	1	0.6002	0.336088	2.95589
320400	2012	322412	常州市	0.04	8.34	0.965472	0.336073	0.88233	0.03	17154	592009	3500000	519	0.33	0.098547	0.968743	0.250342	0.06	0.0954016	0.001322	0.033299	0.058419	0.000381	33325.8	239.72	0	1	1	0.8081	0.395827	3.33258
320400	2013	322413	常州市	0.03	8.37	0.990228	0.353	1.06303	0.03	11712	626771	3700000	523	0.38	0.095828	0.978414	0.262688	0.04	0.101651	0.002529	0.023303	0.024485	0.000696	36946	241.05	0	1	1	0.8633	0.442535	3.6946
320400	2014	322414	常州市	0.05	8.43	0.977125	0.240919	1.08557	0.04	12837	609534	3900000	520	0.43	0.088727	0.997588	0.281134	0.03	0.110604	0.014043	0.035279	0.047464	0.000396	39483.4	244.23	0	1	1	0.8842	0.498934	3.94834
320400	2015	322415	常州市	0.06	8.49	1.01544	0.172065	1.02994	0.04	12795	598187	4100000	535	0.49	0.092038	0.960748	0.291589	0.05	0.115167	0.016897	0.041711	0.054732	0.000393	42710.3	245.73	0	1	1	0.9945	0.5443	4.27103
320400	2016	322416	常州市	0.04	8.53	1.04664	0.25002	1.23815	0.04	12767	624760	4300000	540	0.56	0.088002	0.945248	0.304631	0.06	0.122163	0.003607	0.038684	0.038411	0.000451	46057.7	247.26	0	1	1	1.0615	0.59896	4.60577
320400	2017	322417	常州市	0.04	8.58	1.00918	0.221608	1.02676	0.04	12749	649622	4600000	587	0.63	0.083336	0.940625	0.311135	0.04	0.130404	0.006522	0.033022	0.032625	0.002135	49955	247.78	0	1	1	1.133	0.658271	4.9955
320400	2018	322418	常州市	0.06	8.62	1.06853	0.242189	1.05017	0.05	12737	703604	4900000	654	0.72	0.084368	0.942023	0.321703	0.04	0.139123	0.011564	0.045334	0.052496	0.01	53999.9	248.3	0	1	1	1.3778	0.722454	5.39999
320400	2019	322419	常州市	0.07	8.66	1.16112	0.262812	1.29965	0.05	12729	705029	5100000	665	0.82	0.088392	0.901924	0.328203	0.06	0.142905	0.007335	0.057987	0.059383	0.005939	58344.7	247.07	0	1	1	1.8099	0.794705	5.83447
320400	2020	322420	常州市	0.05	8.69	1.30885	0.27986	1.45032	0.05	12723	767856	5400000	622	0.93	0.093057	0.848945	0.334655	0.07	0.144502	0.00647	0.039722	0.04117	0.005022	60528.9	248.47	0	1	1	2.1132	0.514834	6.05289
320400	2021	322421	常州市	0	8.73	1.33031	0.296382	1.56626	0.05	12720	830684	5700000	578	1.1	0.087635	0.891451	0.351372	0.05	0.162086	0.000224	7e-05	0.000586	0.000174	65821.5	247.53	0	1	1	1.9797	0.699942	6.58215
320400	2022	322422	常州市	0	8.76	1.44271	0.312312	1.65541	0.06	12718	891864	6000000	703	1.2	0.086495	0.764838	0.357502	0	0.168278	0.00187	0.000464	0.014427	0.00031	68578	246.53	0	1	1	1.8049	0.636916	6.8578
320400	2023	322423	常州市	0.02	8.79	1.61065	0.327596	1.7348	0.06	12716	957500	6300000	703	1.4	0.084497	0.795888	0.368034	0	0.18053	0.011051	0.004683	0.009097	0.006637	71744	247.47	0	1	1	1.864		7.1744
320500	2003	322503	苏州市	0	6.96	0.842131	0.680511	0.80523	0.39	7520	650446	12000000	384	0.21	0.065534	0.928649	0.175836		0.0806146	0	6.7e-05	0.010905	0.000169	12362	229.65	0	1	1	0.0798	0.23502	1.2362
320500	2004	322504	苏州市	0.02	7.06	0.845141	0.503314	0.9496	0.39	9001	758762	12000000	491	0.3	0.067574	0.941816	0.189036	0	0.0918786	0.014968	0.002992	0.000981	0.00322	14450.9	228.8	0	1	1	0.0952	0.3157	1.44509
320500	2005	322505	苏州市	0.04	7.15	0.863858	0.511596	1.09189	0.39	10539	912633	12000000	563	0.41	0.083268	0.944838	0.196129	0.02	0.0930085	6.1e-05	0.040574	0.028488	0.000261	16275.9	228	0	1	1	0.1305	0.3657	1.62759
320500	2006	322506	苏州市	0	7.26	0.918975	0.610461	1.28194	0.39	11222	1000000	12000000	730	0.51	0.08012	1.03633	0.227342	0.04	0.109984	1.5e-05	0.000166	0.015847	1.6e-05	18531.7	229.71	0	1	1	0.1904	0.4135	1.85317
320500	2007	322507	苏州市	0	7.36	0.937382	0.716471	1.52459	0.39	11965	1200000	12000000	916	0.65	0.08717	1.0903	0.240951	0	0.11828	0.000945	0.003306	0.004545	0.002677	21260.3	231.83	0	1	1	0.3348	0.479239	2.12603
320500	2008	322508	苏州市	0.02	7.42	0.940387	0.813262	1.66828	0.39	12758	1400000	13000000	1031	0.75	0.092873	1.07478	0.260186	0	0.136993	7.5e-05	0.020594	0.020571	0.025	24679.6	233.72	0	1	1	0.4959	0.528688	2.46796
320500	2009	322509	苏州市	0.07	7.46	1.09885	0.822653	1.87678	0.39	11487	1400000	13000000	1146	0.92	0.088729	1.08504	0.275858	0.02	0.142692	0.00023	0.066258	0.066465	1e-05	27188.4	236.58	0	1	1	0.6759	0.586967	2.71884
320500	2010	322510	苏州市	0.07	7.51	1.09798	0.853511	1.77743	0.39	13509	1600000	13000000	1309	1.1	0.089465	1.0907	0.288945	0.07	0.161713	0.00749	0.058726	0.065441	0.000193	30366	238.69	0	1	1	0.9772	0.700488	3.0366
320500	2011	322511	苏州市	0.09	7.57	1.10795	0.901623	1.78541	0.39	15694	1700000	13000000	1460	1.4	0.093555	1.098	0.305573	0.07	0.172891	0.009203	0.080995	0.084638	5e-06	34616.7	240.09	0	1	1	1.4409	0.777538	3.46167
320500	2012	322512	苏州市	0.06	7.63	1.13447	0.91649	1.92206	0.39	17419	1900000	14000000	1552	1.7	0.092699	1.08161	0.336919	0.09	0.20543	0.002316	0.059192	0.06169	0.002002	39079.2	241.6	0	1	1	2.1645	0.862443	3.90792
320500	2013	322513	苏州市	0.05	7.7	1.1905	0.869805	2.01926	0.39	12070	2100000	14000000	1474	2	0.093171	1.09759	0.351209	0.06	0.208484	0.005433	0.044009	0.042229	0.00053	42964	243.1	0	1	1	2.6032	0.941633	4.2964
320500	2014	322514	苏州市	0.06	7.64	1.2534	0.811978	2.09479	0.39	13175	2000000	14000000	1469	2.4	0.094822	1.10652	0.372224	0.05	0.228868	0.008032	0.047642	0.052475	0.007892	46677.1	245.95	0	1	1	2.6472	1.00288	4.66771
320500	2015	322515	苏州市	0.1	7.7	1.32377	0.600023	2.14147	0.39	13639	1900000	14000000	1447	2.9	0.105293	1.02199	0.385163	0.06	0.23544	0.022209	0.081669	0.099769	0.00129	50390.2	247.45	0	1	1	3.0261	1.06055	5.03902
320500	2016	322516	苏州市	0.16	7.74	1.41676	0.6003	2.19271	0.39	13405	2000000	15000000	1448	3.5	0.104498	1.06983	0.406878	0.1	0.258489	0.055773	0.104452	0.153169	0.000549	54341.4	249.11	0	1	1	3.3339	1.13004	5.43414
320500	2017	322517	苏州市	0.18	7.76	1.38495	0.450392	2.09735	0.39	13521	2100000	15000000	1596	4.2	0.102282	1.07713	0.416854	0.16	0.280917	0.1173	0.067371	0.174884	0.001502	58806.2	248.875	0	1	1	3.8314	1.20464	5.88062
320500	2018	322518	苏州市	0.23	7.79	1.42741	0.452498	2.1795	0.39	13463	2200000	16000000	1783	5	0.104999	1.08567	0.430271	0.18	0.297121	0.14155	0.085639	0.207153	0.009351	63481.4	248.64	0	1	1	4.4445	1.28477	6.34814
320500	2019	322519	苏州市	0.22	7.82	1.56564	0.461545	2.49022	0.39	13492	2100000	15000000	1849	5.9	0.111325	1.03753	0.453371	0.23	0.326443	0.132216	0.089217	0.206192	0.015	68629	249.47	0	1	1	5.3427	1.33741	6.8629
320500	2020	322520	苏州市	0.16	7.84	1.69538	0.461217	2.63246	0.39	13477	2300000	16000000	1840	6.9	0.112222	1.01745	0.456849	0.22	0.336114	0.064766	0.098786	0.148594	0.015	70966	250.5	0	1	1	6.604	0.938214	7.0966
320500	2021	322521	苏州市	0	7.87	1.73883	0.460961	2.75147	0.39	13485	2400000	16000000	1831	8.2	0.113729	0.971473	0.47704	0.16	0.361838	0.000315	0.000644	0.002143	0.008889	76888.2	249.49	0	1	1	5.9424	1.12488	7.68882
320500	2022	322522	苏州市	0.02	7.89	1.88861	0.460761	2.92738	0.39	13481	2600000	17000000	1871	9.6	0.108046	0.899794	0.48138	0	0.361003	0.010693	0.006778	0.00233	0.0003	79537	249.32	0	1	1	5.3643	0.990183	7.9537
320500	2023	322523	苏州市	0.05	7.91	2.07876	0.460605	3.0524	0.39	13483	2800000	17000000	1892	11	0.106327	0.937258	0.495547	0.02	0.37592	0.017546	0.035938	0.041569	0.012	82000	250.58	0	1	1	5.3925		8.2
320600	2003	322603	南通市	0	9.72	0.697592	0.073092	0.43681	0.19	7293	110229	1400000	169	0.04	0.061624	0.786717	0.121382		0.0332272	0.000162	0.003813	0.003575	1.2e-05	9598	219.21	0	1	1	0.0203	0.0515	0.9598
320600	2004	322604	南通市	0	9.67	0.695914	0.110434	0.51439	0.19	7859	783697	1500000	206	0.05	0.0617	0.695179	0.124292	0	0.0352649	4.9e-05	0.0037	0.000213	0.011	10937	220.55	0	1	1	0.024	0.0629	1.0937
320600	2005	322605	南通市	0	9.63	0.67639	0.153162	0.56724	0.19	9751	313903	1600000	238	0.07	0.060859	0.803557	0.134704	0	0.0386232	6.4e-05	0.000541	2.1e-06	5e-07	12384.2	221.16	0	1	1	0.037	0.0743	1.23842
320600	2006	322606	南通市	0	9.62	0.689139	0.257497	0.65364	0.19	9448	355545	1700000	281	0.08	0.06405	0.821622	0.145715	0	0.0415598	8.4e-05	0.001133	0.008039	5.2e-06	14058.3	223.86	0	1	1	0.0417	0.0883	1.40583
320600	2007	322607	南通市	0.01	9.58	0.690909	0.311745	0.73125	0.19	12024	402459	1800000	334	0.12	0.069942	0.864509	0.158145	0	0.0481273	0.000675	0.010063	0.042363	0.001344	16450.5	225.86	0	1	1	0.0546	0.1072	1.64505
320600	2008	322608	南通市	0.02	9.55	0.688498	0.29371	0.8338	0.19	13033	451465	2000000	381	0.15	0.078171	0.813325	0.160595	0.01	0.0508222	0.000797	0.019129	0.015496	0.000257	17540.5	226.14	0	1	1	0.0942	0.1275	1.75405
320600	2009	322609	南通市	0.02	9.53	0.806071	0.200481	0.8939	0.19	15916	515987	2200000	510	0.2	0.08266	0.837958	0.16792	0.02	0.0546277	5.6e-05	0.022463	0.02228	0.00014	19468.7	226.58	0	1	1	0.1692	0.1483	1.94687
320600	2010	322610	南通市	0.02	9.54	0.820372	0.206056	0.82647	0.19	20302	529313	2300000	593	0.25	0.091396	0.918097	0.184573	0.02	0.0649529	4.8e-05	0.017473	0.017489	0.001065	21825	228.57	0	1	1	0.2934	0.1757	2.1825
320600	2011	322611	南通市	0.06	9.56	0.805199	0.216644	0.74529	0.19	24214	571608	2500000	775	0.32	0.102801	0.890896	0.195136	0.02	0.070043	0.002081	0.054256	0.055624	0.001009	25093.7	230.5	0	1	1	0.4144	0.2109	2.50937
320600	2012	322612	南通市	0.06	9.56	0.841723	0.220542	0.75402	0.19	26815	628100	2700000	809	0.4	0.112534	0.818164	0.209638	0.06	0.0805357	0.002157	0.060479	0.00666	0.000597	28292.5	232.04	0	1	1	0.3757	0.2408	2.82925
320600	2013	322613	南通市	0.03	9.58	0.894748	0.228743	0.76272	0.19	17098	666609	2900000	642	0.49	0.114392	0.842943	0.220644	0.06	0.0897998	0.000614	0.028851	0.027593	0.000352	30641	233.23	0	1	1	0.4599	0.2716	3.0641
320600	2014	322614	南通市	0.07	7.28	0.907599	0.230479	0.80895	0.19	18410	645196	3200000	645	0.59	0.114915	0.846704	0.235632	0.03	0.09676	0.002134	0.069645	0.068753	0.002049	33374	237.23	0	1	1	0.5207	0.3066	3.3374
320600	2015	322615	南通市	0.05	7.27	0.975416	0.231559	0.83218	0.19	19564	614753	3400000	682	0.72	0.121816	0.835334	0.244043	0.07	0.0996358	0.007049	0.039772	0.046305	0.013	36291.4	239.03	0	1	1	0.605	0.3387	3.62914
320600	2016	322616	南通市	0.05	7.27	1.00994	0.238724	0.9484	0.19	20790	649165	3700000	679	0.86	0.110697	0.787726	0.259824	0.05	0.107293	0.001826	0.044223	0.044736	0.001465	39247	241.32	0	1	1	0.6619	0.3792	3.9247
320600	2017	322617	南通市	0.04	7.27	1.01278	0.242266	0.90388	0.19	22092	682113	4000000	727	1	0.104734	0.729067	0.265617	0.05	0.112671	0.002205	0.039949	0.040019	0.032	42756	242.015	0	1	1	0.8885	0.4247	4.2756
320600	2018	322618	南通市	0.07	7.27	1.04565	0.25814	0.95306	0.19	23476	730930	4300000	813	1.2	0.104092	0.691061	0.276221	0.04	0.121953	0.005233	0.063388	0.063467	0.007986	46321	242.71	0	1	1	1.0548	0.4767	4.6321
320600	2019	322619	南通市	0.07	7.27	1.08834	0.266528	1.11912	0.19	24947	744740	4500000	847	1.4	0.10366	0.63668	0.284633	0.07	0.129749	0.004007	0.063725	0.063434	0.004297	50217	240.84	0	1	1	1.1945	0.5251	5.0217
320600	2020	322620	南通市	0.06	7.27	1.20704	0.272467	1.2507	0.19	26510	858962	5000000	880	1.6	0.107675	0.591601	0.29366	0.07	0.133539	0.01182	0.047284	0.050256	0.008847	52484	242.37	0	1	1	1.3643	0.1621	5.2484
320600	2021	322621	南通市	0	7.27	1.27739	0.276535	1.34577	0.19	28170	973184	5600000	912	1.9	0.10177	0.632834	0.303946	0.06	0.14502	0.001244	0.000227	0.004765	0.003532	57289	241.61	0	1	1	1.5548	0.431497	5.7289
320600	2022	322622	南通市	0.01	7.27	1.4066	0.279305	1.49154	0.19	29934	971809	6100000	914	2.1	0.10081	0.534334	0.306143	0	0.146052	0.004566	0.001281	0.001061	0.00044	59605	240.73	0	1	1	1.7221	0.291517	5.9605
320600	2023	322623	南通市	0.02	7.27	1.54813	0.281183	1.56573	0.19	31808	1100000	6600000	942	2.4	0.099969	0.57595	0.314588	0.01	0.152178	0.007544	0.010805	0.011818	0.006532	62512	241.71	0	1	1	1.537		6.2512
320700	2003	322703	连云港市	0	6.24	0.610912	0.02124	0.24247	0.03	4452	102083	1900000	54	0.01	0.081115	0.560043	0.104943		0.0160095	0.000591	0.0028	5.5e-06	0.000131	7782	209.13	0	1	1	0.0069	0.05016	0.7782
320700	2004	322704	连云港市	0	6.25	0.565917	0.024659	0.2509	0.03	4826	114671	1900000	62	0.01	0.078019	0.571855	0.108681	0	0.0175672	0.001089	0.000552	0.017033	2.2e-05	8871.95	211.21	0	1	1	0.0091	0.0609	0.887195
320700	2005	322705	连云港市	0.03	6.3	0.577478	0.02748	0.27543	0.03	5609	121900	1900000	75	0.01	0.100565	0.536302	0.11233	0	0.0187715	5e-05	0.028449	0.114831	0.000413	10005.9	213.87	0	1	1	0.0106	0.07	1.00059
320700	2006	322706	连云港市	0.01	6.39	0.617961	0.034558	0.28096	0.03	5985	138925	1900000	109	0.02	0.109302	0.589126	0.118193	0.03	0.0201275	0.005787	0.007754	0.000246	8.3e-05	11474.6	216.7	0	1	1	0.0135	0.0803	1.14746
320700	2007	322707	连云港市	0	6.43	0.647433	0.073787	0.30715	0.03	8270	163114	1900000	148	0.02	0.130487	0.604789	0.120826	0.01	0.0219348	3.3e-05	0.004513	0.032628	0.00085	13254.2	218.21	0	1	1	0.0139	0.0911	1.32542
320700	2008	322708	连云港市	0	6.51	0.653897	0.093528	0.27667	0.03	11493	199877	1900000	182	0.04	0.141887	0.622115	0.125978	0	0.0243132	0.000151	0.000204	0.000319	0.00041	12267.8	218.95	0	1	1	0.017	0.1065	1.22678
320700	2009	322709	连云港市	0.02	6.54	0.726529	0.103992	0.29192	0.03	10554	220591	1900000	247	0.05	0.149084	0.642968	0.131864	0	0.026917	7.1e-05	0.01982	0.019854	0.000411	13885.5	219.89	0	1	1	0.0237	0.121	1.38855
320700	2010	322710	连云港市	0.02	6.64	0.792971	0.110116	0.34538	0.03	12690	242330	1900000	307	0.07	0.169907	0.69735	0.151031	0.02	0.0345795	0.000108	0.015437	0.015509	0.000534	15790	222.72	0	1	1	0.0358	0.1393	1.579
320700	2011	322711	连云港市	0.05	6.63	0.716885	0.060986	0.33862	0.03	18753	268538	1900000	367	0.1	0.194704	0.655709	0.156348	0.02	0.0383235	0.003917	0.050166	0.05405	0.000499	18482.8	223.67	0	1	1	0.0726	0.1656	1.84828
320700	2012	322712	连云港市	0.01	6.71	0.746268	0.073354	0.33876	0.03	18340	293951	1900000	383	0.13	0.194925	0.668505	0.168271	0.05	0.0439051	0.005798	0.006779	0.004186	0.003659	20816.4	224.11	0	1	1	0.0892	0.1894	2.08164
320700	2013	322713	连云港市	0.02	6.83	0.765613	0.08699	0.37591	0.03	13286	307482	1900000	352	0.17	0.202967	0.643805	0.172709	0.01	0.0470436	0.00016	0.019888	0.0199	0.002374	21461	224.74	0	1	1	0.0829	0.2136	2.1461
320700	2014	322714	连云港市	0	6.91	0.788109	0.095438	0.38119	0.04	15015	302164	1900000	367	0.22	0.191236	0.696299	0.182357	0.02	0.0532195	4.3e-05	0.004581	0.004001	0.0014	23595	227.11	0	1	1	0.0851	0.2415	2.3595
320700	2015	322715	连云港市	0.03	6.97	0.824315	0.080108	0.38717	0.04	18198	292505	1900000	368	0.27	0.197127	0.685035	0.189378	0	0.0553233	0.001612	0.031617	0.032605	0.002858	25728.3	228.43	0	1	1	0.1262	0.26827	2.57283
320700	2016	322716	连云港市	0.02	7.04	0.861329	0.055044	0.38647	0.04	17449	307518	1900000	368	0.33	0.157005	0.566761	0.203262	0.03	0.0570217	0.000287	0.015456	0.015501	0.000606	27853	229.44	0	1	1	0.1564	0.30111	2.7853
320700	2017	322717	连云港市	0.02	7.11	0.921603	0.070902	0.39855	0.04	17610	324370	1800000	409	0.4	0.147921	0.550102	0.204563	0.02	0.0602036	0.000782	0.022252	0.021532	0.002357	30293	230.69	0	1	1	0.1925	0.338418	3.0293
320700	2018	322718	连云港市	0.02	7.18	1.05399	0.060345	0.4161	0.05	17575	347822	1800000	448	0.47	0.151375	0.558455	0.211025	0.02	0.0633234	0.001011	0.022596	0.022714	0.005899	32749	231.94	0	1	1	0.2592	0.380219	3.2749
320700	2019	322719	连云港市	0.03	7.25	1.10233	0.061402	0.47006	0.05	17582	356152	1800000	470	0.55	0.148464	0.520224	0.219165	0.02	0.0683865	0.001645	0.028143	0.026853	0.002935	35390	232.5	0	1	1	0.2849	0.419936	3.539
320700	2020	322720	连云港市	0.02	7.33	1.28642	0.060888	0.54005	0.05	17581	413530	2200000	500	0.63	0.153094	0.488692	0.221295	0.03	0.0682595	0.001143	0.017246	0.016511	0.001879	36722	233.57	0	1	1	0.3895	0.256255	3.6722
320700	2021	322721	连云港市	0	7.4	1.37893	0.060554	0.60457	0.05	17581	470908	2500000	529	0.71	0.143289	0.514446	0.226232	0.02	0.0726565	0.000699	0.000268	0.035221	0.000515	39861.9	234.05	0	1	1	0.3508	0.361951	3.98619
320700	2022	322722	连云港市	0	7.47	1.49929	0.060338	0.61695	0.06	17581	458813	2900000	524	0.8	0.133832	0.397026	0.22694	0	0.0734966	0.00066	0.000467	0.000824	0.00751	41282	232.52	0	1	1	0.3237	0.341114	4.1282
320700	2023	322723	连云港市	0.02	7.54	1.60365	0.060198	0.63888	0.06	17581	511509	3200000	495	0.89	0.13169	0.445485	0.233448	0	0.0781819	0.015537	0.008202	0.013599	0.01	43769	232.94	0	1	1	0.325		4.3769
320800	2003	322803	淮安市	0	5.16	0.525351	0.010036	0.37249	0.03	3413	95924	593346	60	0.01	0.078141	0.568091	0.092606		0.0186802	0	1.1e-05	0.000664	0.000524	7798	205.5	0	1	1	0.008	0.04061	0.7798
320800	2004	322804	淮安市	0	5.2	0.502781	0.012051	0.37956	0.03	3705	108762	640449	70	0.02	0.07906	0.563177	0.098333	0	0.0204196	0.000164	5e-05	0.000414	0.002219	8209.07	207.27	0	1	1	0.0097	0.049	0.820907
320800	2005	322805	淮安市	0	5.24	0.488886	0.006771	0.46688	0.03	3963	123006	691293	79	0.02	0.087988	0.54164	0.109099	0	0.0220545	0	0.003121	0.044702	0.037	9114.82	210.8	0	1	1	0.0101	0.055	0.911482
320800	2006	322806	淮安市	0.02	5.29	0.511136	0.011569	0.54799	0.03	4367	134650	746173	95	0.02	0.095474	0.594307	0.115803	0	0.0233053	0.002959	0.012902	0.04025	9.1e-05	10447.2	214.1	0	1	1	0.0156	0.0635	1.04472
320800	2007	322807	淮安市	0.05	5.3	0.517908	0.028637	0.644	0.03	5017	158094	805412	127	0.03	0.109311	0.614429	0.121884	0.02	0.0257791	0.008863	0.042298	0.011132	2.3e-06	12164	216.72	0	1	1	0.0201	0.073329	1.2164
320800	2008	322808	淮安市	0.01	5.33	0.493257	0.045465	0.69703	0.03	5528	166402	869356	134	0.03	0.124798	0.624324	0.124556	0.05	0.0276885	0.001638	0.005155	0.006793	7e-05	12517.3	218.49	0	1	1	0.0279	0.08547	1.25173
320800	2009	322809	淮安市	0.02	5.3	0.58699	0.061418	0.79465	0.03	7889	172488	938377	170	0.04	0.132179	0.650496	0.130636	0.01	0.0301318	0.000157	0.021122	0.021248	3.8e-08	14049.8	220.25	0	1	1	0.0353	0.101003	1.40498
320800	2010	322810	淮安市	0.06	5.35	6.07055	0.105153	0.68805	0.03	9484	204500	1000000	281	0.04	0.148516	0.686032	0.151833	0.02	0.0375112	0.000512	0.059748	0.059903	1e-06	15983	224.14	0	1	1	0.057	0.11563	1.5983
320800	2011	322811	淮安市	0.02	5.39	0.586798	0.161996	0.67436	0.03	11197	226209	1100000	255	0.05	0.175549	0.689734	0.161337	0.06	0.0425416	0.004046	0.019955	0.02387	0.000131	18509.7	225.54	0	1	1	0.0604	0.13982	1.85097
320800	2012	322812	淮安市	0	5.43	0.610743	0.212094	0.67113	0.03	11860	240700	1200000	295	0.06	0.176926	0.687378	0.1789	0.02	0.0500878	0.000269	0.004658	0.031931	0.000167	20949.8	226.89	0	1	1	0.0881	0.16107	2.09498
320800	2013	322813	淮安市	0.01	5.49	0.637865	0.130219	0.66876	0.03	10440	302207	1300000	358	0.06	0.178608	0.704887	0.18954	0	0.0545494	0.000435	0.012639	0.012507	0.000296	23582	228.09	0	1	1	0.1107	0.18332	2.3582
320800	2014	322814	淮安市	0.02	5.59	0.658776	0.119867	0.67289	0.04	11487	297084	1400000	376	0.07	0.175799	0.714722	0.203302	0.01	0.0625136	0.000678	0.015383	0.015034	0.00118	25798	231.39	0	1	1	0.1524	0.20896	2.5798
320800	2015	322815	淮安市	0.04	5.62	0.679306	0.121386	0.68011	0.04	12072	290903	1500000	383	0.08	0.186686	0.683572	0.211886	0.02	0.0648391	0.001918	0.041593	0.041037	0.000518	28105	233.72	0	1	1	0.1719	0.23238	2.8105
320800	2016	322816	淮安市	0.04	5.62	0.755976	0.116135	0.69653	0.04	11899	307818	1600000	383	0.09	0.158619	0.652595	0.22123	0.04	0.0664969	0.001643	0.041123	0.042315	0.001048	30335	236.09	0	1	1	0.2174	0.26105	3.0335
320800	2017	322817	淮安市	0.08	5.62	0.837904	0.117824	0.70093	0.04	11949	323986	1700000	412	0.09	0.135875	0.50984	0.215423	0.04	0.0657224	0.001942	0.075999	0.045515	0.002985	32976	236.645	0	1	1	0.3215	0.293174	3.2976
320800	2018	322818	淮安市	0.03	5.62	0.917303	0.118213	0.71834	0.05	11935	351865	1900000	459	0.1	0.135167	0.50799	0.221993	0.08	0.0689994	0.002333	0.02559	0.017516	0.001059	35828	237.2	0	1	1	0.3802	0.329011	3.5828
320800	2019	322819	淮安市	0.01	5.62	0.997623	0.104854	0.75558	0.05	11939	356808	1900000	484	0.11	0.136696	0.48627	0.231474	0.03	0.0732839	0.006856	0.005331	0.005883	0.006303	38952	237.29	0	1	1	0.4148	0.365847	3.8952
320800	2020	322820	淮安市	0.05	5.62	1.15051	0.104992	0.89864	0.05	11938	381474	2100000	484	0.12	0.14118	0.464951	0.237868	0.01	0.0752679	0.026688	0.020944	0.020387	0.027	40318	238.1	0	1	1	0.4421	0.220436	4.0318
320800	2021	322821	淮安市	0	5.62	1.21262	0.105018	1.18181	0.05	11938	406141	2300000	485	0.13	0.134706	0.484612	0.242569	0.05	0.0803834	0.000436	0.000603	0.010241	0.000148	43953.6	238.91	0	1	1	0.4137	0.329395	4.39536
320800	2022	322822	淮安市	0	5.62	1.35953	0.105023	1.01055	0.06	11938	448866	2600000	505	0.14	0.139044	0.455115	0.245677	0	0.0826411	0.000396	0.000792	0.000947	0.0021	46041	237.77	0	1	1	0.3332	0.249286	4.6041
320800	2023	322823	淮安市	0.01	5.62	1.52232	0.105024	1.0122	0.06	11938	485962	2800000	521	0.15	0.14304	0.441358	0.254492	0	0.0875432	0.006692	0.00674	0.009097	0.004336	48498	240.2	0	1	1	0.334		4.8498
320900	2003	322903	盐城市	0	5.32	0.557471	0.023907	0.23513	0.1	6967	89771	886571	124	0.02	0.059632	0.598972	0.104944		0.0252357	9.8e-05	0.002029	0.002408	4e-06	8059	205.62	0	1	1	0.0105	0.04151	0.8059
320900	2004	322904	盐城市	0.02	5.33	0.504383	0.015389	0.27803	0.1	7187	182575	964062	141	0.03	0.0627	0.551149	0.112342	0	0.0280659	0.005431	0.01253	0.00531	2.5e-05	9361.53	208.42	0	1	1	0.0129	0.0465	0.936153
320900	2005	322905	盐城市	0.12	4.71	0.473871	0.016183	0.32569	0.1	7830	204631	1000000	176	0.03	0.07027	0.536627	0.119263	0.02	0.0282717	0.010671	0.108491	0.010758	8e-08	10580.4	209.52	0	1	1	0.0142	0.053	1.05804
320900	2006	322906	盐城市	0.01	4.74	0.45484	0.032522	0.37998	0.1	8114	226850	1100000	206	0.04	0.073144	0.568639	0.123412	0.12	0.031471	0.000332	0.009016	0.016445	5e-06	12052.5	211.5	0	1	1	0.0168	0.0611	1.20525
320900	2007	322907	盐城市	0.04	4.77	0.454999	0.081084	0.4621	0.1	9909	184024	1200000	267	0.05	0.085455	0.558571	0.12666	0.01	0.0319741	0.013724	0.027823	0.015307	0.000111	13857	214.12	0	1	1	0.0282	0.0703	1.3857
320900	2008	322908	盐城市	0	4.78	0.447254	0.094394	0.55955	0.1	10818	196745	1300000	305	0.05	0.095838	0.587685	0.130009	0.04	0.0357594	6.6e-05	0.000612	0.000594	0.00041	15862	216.11	0	1	1	0.0368	0.0806	1.5862
320900	2009	322909	盐城市	0.03	4.79	0.53915	0.104376	0.55668	0.1	11904	319413	1500000	270	0.06	0.107738	0.614083	0.134037	0	0.0364242	0.000154	0.028558	0.028448	5e-05	14891.3	216.36	0	1	1	0.0501	0.0962	1.48913
320900	2010	322910	盐城市	0.03	4.81	0.561738	0.130355	0.56715	0.1	14078	350260	1600000	237	0.06	0.125129	0.655549	0.152845	0.03	0.046825	0.000427	0.032616	0.031234	5.2e-06	16935	219.91	0	1	1	0.0728	0.1105	1.6935
320900	2011	322911	盐城市	0.05	4.84	0.562416	0.16878	0.55299	0.1	16068	366064	1700000	565	0.06	0.14694	0.660664	0.162198	0.03	0.0502498	0.004221	0.0478	0.051365	0.004391	19414.1	221.76	0	1	1	0.0846	0.1325	1.94141
320900	2012	322912	盐城市	0.03	4.85	0.587002	0.211103	0.54634	0.1	17501	480558	1900000	535	0.06	0.151755	0.660606	0.179313	0.05	0.0625358	0.001276	0.031463	0.026257	7.8e-05	21940.9	222.55	0	1	1	0.1039	0.1537	2.19409
320900	2013	322913	盐城市	0.01	4.85	0.627177	0.154983	0.54891	0.1	13620	469558	2100000	562	0.06	0.159867	0.660107	0.185629	0.03	0.0631627	0.002346	0.011466	0.012372	0.000301	23669	223.77	0	1	1	0.1349	0.1754	2.3669
320900	2014	322914	盐城市	0.05	4.89	0.669509	0.104732	0.5608	0.1	15017	467918	2200000	570	0.06	0.157264	0.693002	0.203378	0.01	0.0742618	0.004384	0.04877	0.052035	0.001659	25854	227.01	0	1	1	0.1814	0.2015	2.5854
320900	2015	322915	盐城市	0.06	4.89	0.722967	0.079519	0.57287	0.1	15693	453986	2400000	589	0.06	0.177166	0.639815	0.211956	0.05	0.0758007	0.002675	0.05242	0.053794	0.001322	28200.4	228.82	0	1	1	0.2774	0.2266	2.82004
320900	2016	322916	盐城市	0.04	4.91	0.808403	0.070669	0.69637	0.1	16399	477810	2600000	585	0.06	0.159597	0.568483	0.220002	0.06	0.078436	0.000673	0.040953	0.041078	0.000629	30496	230.86	0	1	1	0.4095	0.2574	3.0496
320900	2017	322917	盐城市	0.03	4.92	0.840561	0.078862	0.62357	0.1	17136	509118	2900000	631	0.06	0.147222	0.481128	0.217775	0.04	0.0770696	0.001428	0.030358	0.029428	0.001932	33115	232.28	0	1	1	0.703	0.2927	3.3115
320900	2018	322918	盐城市	0.04	4.93	0.890772	0.091313	0.64053	0.1	17906	553825	3200000	686	0.06	0.153101	0.453528	0.224236	0.03	0.0818505	0.010897	0.027709	0.029254	0.002499	35896	233.7	0	1	1	0.8125	0.3327	3.5896
320900	2019	322919	盐城市	0.04	4.95	1.02965	0.091314	0.67439	0.1	18710	564560	3300000	696	0.06	0.153897	0.436457	0.233452	0.04	0.085117	0.00234	0.039343	0.03841	0.003273	38816	235.67	0	1	1	0.7682	0.3704	3.8816
320900	2020	322920	盐城市	0.02	4.96	1.167	0.090539	0.72051	0.1	19550	603324	3700000	706	0.06	0.163548	0.410951	0.236639	0.04	0.0885887	0.002097	0.017744	0.016815	0.003026	40403	236.81	0	1	1	0.9406	0.2405	4.0403
320900	2021	322921	盐城市	0	4.97	1.21484	0.090005	0.74474	0.1	20427	642087	4100000	717	0.06	0.159161	0.428238	0.249924	0.02	0.0957378	0.000421	0.002143	0.015152	0.000116	43787.4	236.2	0	1	1	0.8573	0.267227	4.37874
320900	2022	322922	盐城市	0	4.97	1.35409	0.089635	1.02222	0.1	21343	662000	4400000	702	0.06	0.154507	0.414352	0.253454	0	0.0995633	0.000418	0.001083	0.008267	0.000491	45896	235.2	0	1	1	0.7951	0.257325	4.5896
320900	2023	322923	盐城市	0.04	4.98	1.55744	0.089379	0.14354	0.1	22300	804879	4800000	726	0.06	0.165887	0.393032	0.258935	0	0.103167	0.015331	0.020204	0.022786	0.013	48526	236.61	0	1	1	0.7808		4.8526
321000	2003	323003	扬州市	0	6.84	0.670359	0.048097	0.47426	0.03	5223	159914	1200000	100	0.03	0.062077	0.760414	0.126822		0.0255153	2.5e-05	8.4e-05	0.002453	0.000523	8705	225.02	0	1	1	0.0194	0.06855	0.8705
321000	2004	323004	扬州市	0	6.85	0.597228	0.081398	0.52962	0.03	5518	182810	1300000	126	0.04	0.062457	0.774751	0.131928	0	0.0285569	0.000468	1.7e-05	0.007038	0.000377	9851.05	225.46	0	1	1	0.0226	0.0905	0.985105
321000	2005	323005	扬州市	0.05	6.88	0.556747	0.052579	0.61712	0.03	5855	205058	1300000	162	0.04	0.067483	0.796335	0.136109	0	0.0308723	0.001464	0.046865	0.019063	0.00041	11378.8	223.33	0	1	1	0.041	0.1113	1.13788
321000	2006	323006	扬州市	0	6.91	0.542876	0.076099	0.69846	0.03	6407	217337	1400000	163	0.05	0.068753	0.833146	0.147442	0.05	0.0343717	7e-07	0.000245	0.023831	0.000662	12944.8	225.41	0	1	1	0.05	0.1316	1.29448
321000	2007	323007	扬州市	0.01	6.92	0.572282	0.087515	0.76119	0.03	7270	238193	1500000	198	0.07	0.073718	0.886051	0.152992	0	0.037844	0.000337	0.011215	0.013236	1e-06	15056.9	226.57	0	1	1	0.0596	0.152242	1.50569
321000	2008	323008	扬州市	0.07	6.93	0.565312	0.172003	0.78521	0.03	8057	270387	1500000	237	0.09	0.080378	0.828988	0.155507	0.01	0.0409757	0.018153	0.046393	0.055851	9.7e-05	15464.5	227	0	1	1	0.088	0.18442	1.54645
321000	2009	323009	扬州市	0.01	6.92	0.653281	0.226563	0.76028	0.03	8022	316504	1600000	347	0.11	0.085653	0.805495	0.164121	0.07	0.0447488	0.000468	0.009756	0.009962	0.00013	17331.7	227.24	0	1	1	0.1392	0.22655	1.73317
321000	2010	323010	扬州市	0.02	6.97	0.666549	0.257155	0.77541	0.03	9333	338461	1700000	409	0.12	0.090459	0.831934	0.178996	0.01	0.0532635	0.000317	0.016041	0.01624	5.1e-05	19228	229.38	0	1	1	0.1833	0.26472	1.9228
321000	2011	323011	扬州市	0.07	6.98	0.653167	0.210264	0.7778	0.03	11133	378326	1800000	456	0.13	0.100511	0.8249	0.188064	0.02	0.0585722	0.00125	0.065428	0.065333	0.003166	22474	230.7	0	1	1	0.2354	0.31667	2.2474
321000	2012	323012	扬州市	0.03	6.96	0.684064	0.213808	0.83844	0.03	12244	404235	1900000	491	0.15	0.097096	0.790017	0.198756	0.07	0.0649235	0.000277	0.026061	0.016109	0.021	25306	232.03	0	1	1	0.3077	0.35725	2.5306
321000	2013	323013	扬州市	0.03	6.98	0.720123	0.19588	0.81717	0.03	10528	426893	1900000	430	0.16	0.098179	0.812023	0.206719	0.03	0.0675041	0.000629	0.027194	0.026146	0.000498	27700	233.12	0	1	1	0.3464	0.396536	2.77
321000	2014	323014	扬州市	0.04	7	0.738909	0.138776	0.80955	0.04	11596	417571	2000000	422	0.17	0.099442	0.802746	0.218973	0.03	0.0756646	0.001078	0.037492	0.037831	0.000611	30322	235.73	0	1	1	0.3314	0.454588	3.0322
321000	2015	323015	扬州市	0.04	6.99	0.770697	0.084841	0.8155	0.04	11218	405147	2100000	441	0.19	0.110231	0.760536	0.226741	0.04	0.0789194	0.005591	0.036716	0.039475	0.000924	32946	236.87	0	1	1	0.4136	0.502721	3.2946
321000	2016	323016	扬州市	0.03	6.7	0.788454	0.120392	0.8045	0.04	11288	422884	2300000	437	0.2	0.107649	0.720922	0.237395	0.04	0.0837958	0.003609	0.028006	0.03015	0.00955	35659	238.31	0	1	1	0.4939	0.562202	3.5659
321000	2017	323017	扬州市	0.04	6.74	0.791277	0.120813	0.75619	0.04	11275	441921	2400000	463	0.21	0.100227	0.63072	0.24419	0.03	0.0882054	0.003194	0.0409	0.041109	0.001074	38828	239.66	0	1	1	0.7212	0.62906	3.8828
321000	2018	323018	扬州市	0.06	6.73	0.847121	0.122044	0.78957	0.05	11277	458482	2500000	508	0.22	0.103068	0.603553	0.255237	0.04	0.0957884	0.004648	0.059053	0.055715	0.017	41999	241.01	0	1	1	0.8986	0.703659	4.1999
321000	2019	323019	扬州市	0.03	6.74	0.918778	0.138756	0.86964	0.05	11277	469212	2600000	525	0.23	0.104607	0.537282	0.264438	0.06	0.0996049	0.007951	0.018096	0.019094	0.006953	45550	241.52	0	1	1	1.0354	0.773911	4.555
321000	2020	323020	扬州市	0.02	6.74	1.03832	0.146371	0.99193	0.05	11277	507802	2800000	524	0.24	0.110499	0.504671	0.274304	0.03	0.101435	0.007528	0.010672	0.015675	0.002525	47202	242.78	0	1	1	1.1334	0.383961	4.7202
321000	2021	323021	扬州市	0	6.74	1.06401	0.151089	1.07465	0.05	11277	546393	3000000	523	0.25	0.102274	0.502418	0.281153	0.02	0.108673	0.002756	0.002183	0.00747	0.000614	50947	241.62	0	1	1	0.9022	0.606037	5.0947
321000	2022	323022	扬州市	0.01	6.74	1.14225	0.153962	1.12722	0.06	11277	584076	3100000	547	0.26	0.098406	0.46554	0.285811	0	0.111409	0.006057	0.002486	0.001964	0.000767	53673	240.96	0	1	1	0.917	0.50653	5.3673
321000	2023	323023	扬州市	0.02	6.74	1.31465	0.155694	1.17036	0.06	11277	650010	3300000	561	0.26	0.095815	0.488683	0.294822	0.01	0.116566	0.010143	0.008892	0.012333	0.006702	56781	242.64	0	1	1	0.8574		5.6781
321100	2003	323103	镇江市	0	6.95	0.663641	0.080552	0.4372	0.09	4987	151512	1400000	86	0.04	0.057241	0.780169	0.145193		0.0305101	5.1e-05	0.002423	0.000661	6e-07	9451	231.19	0	1	1	0.0127	0.067	0.9451
321100	2004	323104	镇江市	0.01	6.95	0.626321	0.060601	0.50878	0.09	5426	167644	1400000	102	0.05	0.056487	0.813509	0.150554	0	0.0340017	0.0053	1e-05	0.001311	1.2e-05	10858.3	231.3	0	1	1	0.0178	0.0971	1.08583
321100	2005	323105	镇江市	0.01	6.96	0.643014	0.05959	0.64139	0.09	5692	150911	1500000	106	0.06	0.059861	0.903338	0.155877	0.01	0.035321	0.000791	0.010355	0.009208	3e-05	12394.2	229.53	0	1	1	0.0217	0.1167	1.23942
321100	2006	323106	镇江市	0.04	6.99	0.653957	0.073044	0.72913	0.09	5507	161794	1500000	147	0.07	0.063712	0.923735	0.167573	0.01	0.0388165	0.003772	0.038347	0.001919	0.0001	14290.7	230.3	0	1	1	0.0452	0.1381	1.42907
321100	2007	323107	镇江市	0.02	6.99	0.653873	0.106354	0.79252	0.09	6438	176584	1600000	167	0.09	0.067086	0.991405	0.173196	0.04	0.0425097	0.000107	0.015348	0.001951	0.000101	16774.6	231.59	0	1	1	0.06	0.159	1.67746
321100	2008	323108	镇江市	0.06	6.99	0.654042	0.120175	0.83473	0.09	7329	191989	1600000	186	0.1	0.068583	0.886988	0.173935	0.02	0.0448787	0.042168	0.017943	0.056111	1e-05	19000.9	231.85	0	1	1	0.0996	0.1904	1.90009
321100	2009	323109	镇江市	0.02	7.02	0.769488	0.144081	0.86637	0.09	9613	211643	1700000	231	0.12	0.072554	0.837235	0.180877	0.06	0.0488641	0.001321	0.01787	0.019118	0.00757	21040.9	231.85	0	1	1	0.1356	0.2242	2.10409
321100	2010	323110	镇江市	0.02	7.04	0.786531	0.161462	0.86513	0.09	10435	229564	1700000	278	0.14	0.080028	0.868193	0.19317	0.02	0.0556585	0.001099	0.020314	0.015612	1e-06	23224	234.42	0	1	1	0.1769	0.2607	2.3224
321100	2011	323111	镇江市	0.02	7.07	0.773291	0.180756	0.88013	0.09	12334	239882	1800000	321	0.16	0.087781	0.896505	0.206591	0.02	0.0620601	0.003541	0.018556	0.019372	0.000288	26636.9	235.23	0	1	1	0.2484	0.31	2.66369
321100	2012	323112	镇江市	0.02	7.05	0.788198	0.22141	0.82345	0.09	13599	245996	1900000	337	0.19	0.089433	0.915976	0.225687	0.02	0.0736767	0.000204	0.016015	0.043247	0.00119	30044.9	236.23	0	1	1	0.3975	0.3502	3.00449
321100	2013	323113	镇江市	0.01	7.06	0.807704	0.309678	0.83052	0.09	7828	305249	2000000	318	0.22	0.097779	0.889211	0.243808	0.02	0.0815833	0.001029	0.008203	0.007865	0.000773	32748	237.25	0	1	1	0.5746	0.3895	3.2748
321100	2014	323114	镇江市	0.07	7.09	0.823944	0.129508	0.84214	0.09	8431	299035	2100000	317	0.26	0.095881	0.890712	0.253554	0.01	0.0879395	0.025285	0.044408	0.068174	0.000816	35752	241.39	0	1	1	0.5288	0.4385	3.5752
321100	2015	323115	镇江市	0.03	7.08	0.851567	0.130516	0.8534	0.09	8468	297486	2200000	310	0.3	0.099567	0.868437	0.258916	0.07	0.0900377	0.005694	0.021087	0.026062	0.001386	38665.6	242.11	0	1	1	0.642	0.4803	3.86656
321100	2016	323116	镇江市	0.05	7.09	0.898409	0.135068	0.87481	0.09	8468	301897	2300000	306	0.35	0.094667	0.807324	0.268656	0.03	0.09543	0.002109	0.043803	0.045306	0.006412	41794	243.03	0	1	1	0.7799	0.5348	4.1794
321100	2017	323117	镇江市	0.02	7.1	0.963509	0.135267	0.8037	0.09	8468	313443	2400000	325	0.41	0.096409	0.735415	0.265349	0.05	0.0953606	0.001204	0.019486	0.018757	0.001662	45386	243.195	0	1	1	0.9744	0.5965	4.5386
321100	2018	323118	镇江市	0.03	7.1	1.09891	0.086774	0.8384	0.09	8468	330268	2600000	356	0.48	0.100842	0.738228	0.273316	0.02	0.101405	0.002252	0.027135	0.023488	0.008629	48903	243.36	0	1	1	0.8804	0.6547	4.8903
321100	2019	323119	镇江市	0.02	7.11	1.28049	0.065957	1.00135	0.09	8468	332298	2600000	371	0.56	0.112976	0.658123	0.274984	0.03	0.100822	0.001362	0.022871	0.021952	0.00228	52713	243.65	0	1	1	0.8897	0.7121	5.2713
321100	2020	323120	镇江市	0.03	7.11	1.44678	0.057638	0.93327	0.09	8468	357900	2700000	375	0.65	0.118222	0.624863	0.287598	0.02	0.102233	0.01247	0.02145	0.028922	0.004997	54572	244.74	0	1	1	0.9362	0.377293	5.4572
321100	2021	323121	镇江市	0.04	7.11	1.4609	0.053458	1.10044	0.09	8468	383501	2900000	379	0.76	0.113994	0.603349	0.297459	0.03	0.108758	0.032897	0.011213	0.001067	0.001443	59204	243.78	0	1	1	0.848	0.556356	5.9204
321100	2022	323122	镇江市	0	7.12	1.57884	0.051257	1.17068	0.09	8468	423762	3000000	388	0.89	0.106744	0.567586	0.30291	0.04	0.110138	0.001465	0.000808	0.000915	0.000409	61552	243.2	0	1	1	0.7287	0.235438	6.1552
321100	2023	323123	镇江市	0.02	7.12	1.7127	0.050067	1.23942	0.09	8468	454377	3100000	695	1	0.101434	0.600632	0.31468	0	0.115687	0.007123	0.007616	0.01022	0.004519	64602	245.01	0	1	1	0.6563	0.477741	6.4602
321200	2003	323203	泰州市	0.01	8.7	0.601187	0.030269	0.10371	0.11	4093	147098	2000000	94	0.03	0.070025	0.654108	0.123364		0.024366	0.004712	0.008421	0.002408	0.000672	8517	221.48	0	1	1	0.0143	0.03502	0.8517
321200	2004	323204	泰州市	0.01	8.68	0.563999	0.041472	0.13664	0.11	5374	414661	2000000	96	0.03	0.070174	0.688416	0.127591	0.01	0.0265162	0.006259	0.0008	0.00068	5e-06	9695.2	221.61	0	1	1	0.0174	0.0422	0.96952
321200	2005	323205	泰州市	0.02	8.66	0.543567	0.045647	0.20026	0.11	5558	164986	2000000	118	0.05	0.076176	0.748857	0.126371	0.01	0.0280597	0.005836	0.015885	0.023031	7.6e-05	11121.9	219.17	0	1	1	0.0199	0.0488	1.11219
321200	2006	323206	泰州市	0.02	8.69	0.544309	0.065815	0.25618	0.11	5844	192075	2100000	149	0.06	0.077639	0.78998	0.130109	0.02	0.0298182	0.004619	0.012366	0.003237	0.00252	12681.6	221.62	0	1	1	0.033	0.0567	1.26816
321200	2007	323207	泰州市	0.01	8.64	0.544133	0.075078	0.34481	0.11	7467	219663	2100000	196	0.08	0.085825	0.815855	0.137378	0.02	0.0332175	0.003325	0.00993	0.014637	6.8e-05	14940.4	223.63	0	1	1	0.0397	0.066054	1.49404
321200	2008	323208	泰州市	0.05	8.64	0.568633	0.104988	0.39796	0.11	9352	246936	2100000	230	0.1	0.08996	0.805809	0.143182	0.01	0.0361693	0.001406	0.043438	0.04424	0.004378	16165	225.33	0	1	1	0.0545	0.07861	1.6165
321200	2009	323209	泰州市	0	8.69	0.698633	0.105626	0.43819	0.11	9826	286081	2200000	301	0.11	0.104116	0.801627	0.151113	0.05	0.0395145	1.2e-05	0.002104	0.002116	0.022	18078.7	226.12	0	1	1	0.0832	0.093324	1.80787
321200	2010	323210	泰州市	0.05	8.72	0.712975	0.136254	0.47013	0.11	12365	305186	2200000	339	0.12	0.105298	0.791757	0.168516	0	0.047765	5.5e-07	0.050303	0.046605	0.000503	20255	229.22	0	1	1	0.098	0.10728	2.0255
321200	2011	323211	泰州市	0.07	8.76	0.712183	0.141726	0.47542	0.11	14682	329045	2300000	369	0.14	0.108157	0.832	0.177386	0.05	0.0509469	0.001655	0.072619	0.073659	0.007581	23597	230.54	0	1	1	0.1577	0.12847	2.3597
321200	2012	323212	泰州市	0.04	8.75	0.743234	0.145018	0.48509	0.11	16086	354452	2300000	418	0.15	0.111376	0.776418	0.190433	0.07	0.058228	0.00165	0.042338	0.006912	0.00352	26573.6	231.7	0	1	1	0.2818	0.1457	2.65736
321200	2013	323213	泰州市	0.02	8.77	0.779629	0.132259	0.49089	0.11	16392	379358	2400000	380	0.17	0.114341	0.730866	0.203786	0.04	0.0721266	0.001301	0.014615	0.015603	0.006042	28705	232.95	0	1	1	0.2439	0.164046	2.8705
321200	2014	323214	泰州市	0.04	8.79	0.816255	0.093945	0.49305	0.11	17255	364022	2500000	383	0.18	0.110123	0.748773	0.219069	0.02	0.0814275	0.003104	0.032923	0.035092	0.00035	31346	236.25	0	1	1	0.3178	0.184868	3.1346
321200	2015	323215	泰州市	0.07	8.78	0.875317	0.10655	0.56212	0.11	18128	349608	2500000	407	0.2	0.11657	0.736357	0.220419	0.04	0.0723455	0.002522	0.068007	0.070135	0.001612	34092	238.04	0	1	1	0.3813	0.203734	3.4092
321200	2016	323216	泰州市	0.07	8.78	0.891514	0.134448	0.59201	0.11	18934	370329	2600000	405	0.21	0.109448	0.715434	0.234794	0.07	0.0778542	0.002296	0.069183	0.070431	0.000585	36827.9	240.15	0	1	1	0.4918	0.228232	3.68279
321200	2017	323217	泰州市	0.02	8.78	0.879719	0.170242	0.61748	0.11	19674	399482	2700000	432	0.23	0.100218	0.723407	0.234282	0.07	0.0807318	0.001597	0.019246	0.019769	0.016	40059	240.255	0	1	1	0.7571	0.255832	4.0059
321200	2018	323218	泰州市	0.01	8.78	0.936645	0.150731	0.63413	0.11	20350	428378	2900000	471	0.24	0.104228	0.670887	0.247568	0.02	0.0880119	0.002378	0.008207	0.009526	0.001833	43452	240.36	0	1	1	0.7886	0.286839	4.3452
321200	2019	323219	泰州市	0.04	8.78	1.07768	0.146864	0.65793	0.11	20965	428538	3000000	490	0.26	0.115769	0.615357	0.250978	0.01	0.0911364	0.003192	0.035378	0.037029	0.001541	47216	238.42	0	1	1	0.745	0.315672	4.7216
321200	2020	323220	泰州市	0.02	8.78	1.20179	0.146736	0.68842	0.11	21523	464474	3200000	498	0.27	0.118113	0.597899	0.259516	0.04	0.0925034	0.005664	0.012883	0.012458	0.006089	49103	239.64	0	1	1	0.9056	0.126696	4.9103
321200	2021	323221	泰州市	0.01	8.77	1.22864	0.146632	0.82215	0.11	22027	500410	3400000	507	0.28	0.110855	0.629263	0.267458	0.02	0.101073	0.009587	0.004186	0.007441	9.7e-05	53818	240.07	0	1	1	0.7388	0.233601	5.3818
321200	2022	323222	泰州市	0	8.77	1.34006	0.146547	0.73612	0.11	22480	550639	3600000	522	0.3	0.109945	0.591941	0.273305	0.01	0.104745	0.000397	0.000818	0.001309	0.001392	56576	239.23	0	1	1	0.6472	0.168524	5.6576
321200	2023	323223	泰州市	0.03	8.77	1.51781	0.146479	0.77354	0.11	22888	592488	3800000	538	0.31	0.103598	0.630473	0.281618	0	0.108705	0.01732	0.008002	0.021074	0.004248	59604	240.35	0	1	1	0.6954		5.9604
321300	2003	323303	宿迁市	0	6.05	0.404435	0.00197	0.11111	0.04	1876	37020	424702	38	0	0.089552	0.394185	0.083588		0.0133163	0.003572	1.6e-05	0.002523	0.000325	5593	198.65	0	1	1	0.0014	0.01407	0.5593
321300	2004	323304	宿迁市	0	6.09	0.392755	0.001582	0.09425	0.04	1926	73942	469238	46	0	0.097457	0.338589	0.086367	0	0.0142912	1.1e-05	0.001322	0.026837	0.00015	6378.25	199.46	0	1	1	0.0014	0.0166	0.637825
321300	2005	323305	宿迁市	0.01	6.13	0.391714	0.003345	0.02267	0.04	1915	55640	518443	60	0.01	0.102958	0.35588	0.094096	0	0.0151663	0.000165	0.009413	0.00337	1.1e-06	7208.13	202.58	0	1	1	0.0021	0.0182	0.720813
321300	2006	323306	宿迁市	0.02	6.19	0.430493	0.004858	0.15992	0.04	2060	107083	572808	92	0.01	0.108328	0.407505	0.099874	0.01	0.0176361	0.000339	0.023769	0.012674	4.4e-05	8172.21	207	0	1	1	0.0028	0.0222	0.817221
321300	2007	323307	宿迁市	0	6.21	0.474418	0.007334	0.15389	0.04	3185	119178	632874	135	0.01	0.134565	0.451302	0.102768	0.02	0.0184004	0.000449	0.001666	4.8e-05	0.00311	9467.94	209	0	1	1	0.0028	0.028374	0.946794
321300	2008	323308	宿迁市	0.01	6.25	0.493219	0.009458	0.15751	0.04	3596	68257	699239	139	0.01	0.150547	0.47175	0.110495	0	0.0217201	0.005144	0.002754	0.007079	0.019	9884.84	211.59	0	1	1	0.0087	0.03709	0.988484
321300	2009	323309	宿迁市	0.16	6.32	0.563702	0.011163	0.20153	0.04	5635	154771	772563	209	0.02	0.157297	0.484931	0.117902	0.01	0.0233284	0.024195	0.135191	0.153304	0.000333	11149.3	214.07	0	1	1	0.0127	0.042774	1.11493
321300	2010	323310	宿迁市	0.18	6.39	0.587928	0.018071	0.15973	0.04	6450	181876	853576	297	0.02	0.158222	0.532032	0.140526	0.16	0.0314792	0.017176	0.162477	0.175105	0.00017	12757	218.81	0	1	1	0.0155	0.04904	1.2757
321300	2011	323311	宿迁市	0.02	6.49	0.575396	0.018971	0.17577	0.04	7115	194153	943085	347	0.02	0.1675	0.546815	0.149426	0.18	0.0334394	0.000159	0.017144	0.017083	0.02	14971.8	220.72	0	1	1	0.0299	0.06104	1.49718
321300	2012	323312	宿迁市	0.01	6.55	0.658898	0.045194	0.17128	0.04	7685	214616	1000000	382	0.02	0.178973	0.580486	0.156605	0.02	0.0392805	0.000834	0.006179	0.266044	0.000389	16991.1	222.1	0	1	1	0.0552	0.08048	1.69911
321300	2013	323313	宿迁市	0	6.71	0.751396	0.050895	0.17531	0.04	5497	298534	1200000	367	0.02	0.182364	0.594915	0.16135	0.01	0.039972	0.000349	0.00344	0.003392	0.000614	18480	223.66	0	1	1	0.0715	0.100202	1.848
321300	2014	323314	宿迁市	0.01	6.81	0.768151	0.06648	0.17616	0.04	5930	300007	1300000	376	0.03	0.178999	0.607939	0.177514	0	0.0566657	0.000337	0.005596	0.005536	0.000762	20396	225.14	0	1	1	0.089	0.11698	2.0396
321300	2015	323315	宿迁市	0.04	6.87	0.798002	0.029839	0.18242	0.04	5898	296878	1400000	383	0.03	0.190848	0.580783	0.179639	0.01	0.047764	0.014147	0.028384	0.041241	0.000355	22233.4	226.21	0	1	1	0.0933	0.13166	2.22334
321300	2016	323316	宿迁市	0.02	6.9	0.833804	0.044988	0.19852	0.04	5875	316848	1600000	372	0.03	0.180582	0.560756	0.188284	0.04	0.0501033	0.000379	0.020691	0.02044	0.000898	24086	227.12	0	1	1	0.1143	0.14911	2.4086
321300	2017	323317	宿迁市	0.01	6.92	0.851589	0.036354	0.20984	0.04	5857	340161	1700000	414	0.03	0.162439	0.472932	0.199104	0.02	0.0529412	0.000966	0.012894	0.012199	0.009509	26118	228.875	0	1	1	0.2157	0.169452	2.6118
321300	2018	323318	宿迁市	0.01	6.92	0.931978	0.037684	0.20843	0.04	5844	374002	1900000	465	0.03	0.15761	0.475617	0.206256	0.01	0.0564803	0.002056	0.012431	0.011987	0.000771	28281	230.63	0	1	1	0.3359	0.195076	2.8281
321300	2019	323319	宿迁市	0.04	6.92	0.995102	0.044556	0.23327	0.04	5834	384336	2100000	493	0.03	0.163195	0.420374	0.225068	0.01	0.0649407	0.001625	0.037455	0.038121	0.000958	30614	235.33	0	1	1	0.3162	0.216821	3.0614
321300	2020	323320	宿迁市	0.02	6.93	1.15694	0.049448	0.28389	0.04	5826	425218	2400000	497	0.03	0.1807	0.375219	0.232127	0.04	0.0672328	0.00208	0.013573	0.01325	0.002404	32015	236.19	0	1	1	0.4941	0.125113	3.2015
321300	2021	323321	宿迁市	0.02	6.93	1.19525	0.054722	0.30048	0.04	5821	466100	2600000	501	0.04	0.15722	0.458049	0.240942	0.02	0.0742867	0.001104	0.014562	0.005159	0.001368	35056.3	236.65	0	1	1	0.3722	0.180126	3.50563
321300	2022	323322	宿迁市	0	6.93	1.24918	0.060392	0.33381	0.04	5816	516610	2900000	511	0.04	0.151218	0.437075	0.244312	0.02	0.0771904	0.000656	0.001093	0.024185	0.00191	36756	235.94	0	1	1	0.3209	0.173813	3.6756
321300	2023	323323	宿迁市	0.01	6.93	1.36725	0.066472	0.34765	0.04	5813	544231	3100000	533	0.04	0.145938	0.470529	0.250026	0	0.0804322	0.005099	0.007338	0.008013	0.004424	38756	237.13	0	1	1	0.3392		3.8756
330100	2003	332103	杭州市	0	3.87	1.75586	0.10085	2.69798	0.05	16815	680846	3800000	410	0.17	0.077911	0.919276	0.205592		0.0737283	9.5e-06	0	0.004406	1e-06	12898	235.06	1	1	1	0.1307	0.2776	1.2898
330100	2004	332104	杭州市	0	3.93	1.90856	0.140982	2.92946	0.06	18895	785829	4000000	480	0.2	0.077785	1.00932	0.217015	0	0.0843056	0.00092	0	0.003581	0.000343	14565	234.94	1	1	1	0.1941	0.3016	1.4565
330100	2005	332105	杭州市	0.02	3.98	1.88446	0.171274	3.28524	0.07	19909	846700	4200000	619	0.26	0.080993	1.05086	0.229249	0	0.0858658	0	0.023284	0.000621	0.000483	16601	238.05	1	1	1	0.2855	0.3266	1.6601
330100	2006	332106	杭州市	0	4.01	1.88755	0.225536	3.49976	0.08	20925	964422	4400000	680	0.31	0.080047	1.09405	0.244576	0.02	0.0985923	0.000218	0.001835	0.003507	7e-05	19027	239.6	1	1	1	0.3148	0.3694	1.9027
330100	2007	332107	杭州市	0.02	4.05	1.98585	0.280181	3.6616	0.09	22569	1100000	4600000	810	0.36	0.081878	1.16652	0.252543	0	0.102551	0.003993	0.011878	0.006686	0.00041	21689	240.88	1	1	1	0.3846	0.4112	2.1689
330100	2008	332108	杭州市	0.01	4.08	2.04643	0.331154	3.79857	0.1	22550	1200000	4800000	867	0.43	0.087775	1.08503	0.265859	0.02	0.120473	0.000244	0.010236	0.009892	0.000252	23534	241.55	1	1	1	0.4958	0.4552	2.3534
330100	2009	332109	杭州市	0.13	4.12	2.57753	0.40137	3.94087	0.12	22372	1300000	5000000	1012	0.5	0.096392	1.06197	0.271671	0.01	0.119409	0.069218	0.063762	0.125241	0.001122	26171.2	244.57	1	1	1	0.7009	0.5094	2.61712
330100	2010	332110	杭州市	0.16	4.15	0.838936	0.435627	4.34811	0.14	25915	1300000	5300000	1062	0.59	0.103642	1.08881	0.291181	0.13	0.142911	0.04314	0.114984	0.157184	0.000362	29139	244.19	1	1	1	0.8589	0.6305	2.9139
330100	2011	332111	杭州市	0.28	4.19	2.33958	0.47223	4.46721	0.16	28831	1500000	5500000	1218	0.69	0.106497	1.05036	0.305986	0.16	0.150368	0.141837	0.136228	0.269382	0.001158	32434	244.88	1	1	1	1.1006	0.7181	3.2434
330100	2012	332112	杭州市	0.27	4.23	2.20659	0.496061	4.59181	0.18	30088	1600000	5800000	1439	0.81	0.100779	1.09374	0.328774	0.28	0.175019	0.236051	0.03563	0.087183	0.0001	35703.5	246.67	1	1	1	1.4753	0.8237	3.57035
330100	2013	332113	杭州市	0.18	4.26	2.20525	0.527633	4.7182	0.21	30734	1800000	6100000	1547	0.95	0.102563	1.10455	0.352221	0.27	0.183501	0.105673	0.078088	0.167557	2.7e-05	40925	248.75	1	1	1	1.5259	0.9409	4.0925
330100	2014	332114	杭州市	0.26	4.31	2.21115	0.63346	4.747	0.25	29335	1700000	6400000	1562	1.1	0.104406	1.06881	0.367781	0.18	0.203551	0.161011	0.101242	0.254362	0.000947	44632	251.27	1	1	1	1.552	1.0538	4.4632
330100	2015	332115	杭州市	0.42	4.36	2.22834	0.711253	4.75558	0.29	28832	1700000	6700000	1727	1.3	0.119946	1.02356	0.390772	0.26	0.214038	0.371998	0.052533	0.411517	0.000162	48316	254.37	1	1	1	1.9848	1.204	4.8316
330100	2016	332116	杭州市	0.3	4.4	2.25079	0.720915	4.27978	0.34	28585	1900000	7000000	1734	1.5	0.124124	0.99863	0.414699	0.42	0.23048	0.261494	0.036389	0.288333	0.002096	52185	257.2	1	1	1	2.3302	1.3696	5.2185
330100	2017	332117	杭州市	0.19	4.45	2.26714	0.661001	4.25769	0.4	28462	1900000	7400000	1724	1.8	0.122262	1.0172	0.440209	0.3	0.254052	0.120431	0.069511	0.174339	0.001235	56276	258.92	1	1	1	2.6414	1.58844	5.6276
330100	2018	332118	杭州市	0.23	4.49	2.6558	0.682658	4.31965	0.46	28402	2000000	8000000	1801	2.1	0.127105	1.06288	0.457049	0.19	0.274653	0.109568	0.122323	0.214764	0.000656	61172	260.64	1	1	1	3.4241	1.7983	6.1172
330100	2019	332119	杭州市	0.32	4.53	2.68246	0.612818	4.46683	0.53	28372	2000000	8200000	1817	2.5	0.127031	1.00672	0.481726	0.23	0.298099	0.205592	0.113445	0.28742	0.032	66068	263.05	1	1	1	4.1379	2.07	6.6068
330100	2020	332120	杭州市	0.23	4.58	3.05381	0.573749	4.65963	0.6	28357	2200000	8600000	1812	2.9	0.128502	1.01147	0.488893	0.32	0.30494	0.170032	0.063427	0.21058	0.023	68666	265	1	1	1	5.1407	1.7559	6.8666
330100	2021	332121	杭州市	0.01	4.62	3.07369	0.541707	5.8521	0.68	28350	2400000	9000000	1807	3.4	0.132091	0.997723	0.507829	0.23	0.334194	0.000824	0.006794	0.000257	0.000589	74700	265.01	1	1	1	5.2466	0.8934	7.47
330100	2022	332122	杭州市	0.03	4.67	3.29563	0.515219	5.0115	0.76	28346	2600000	9400000	1850	3.9	0.135556	0.964015	0.515997	0.01	0.346562	0.022297	0.009398	0.00946	0.000278	77043	265.35	1	1	1	4.8411	0.8096	7.7043
330100	2023	332123	杭州市	0.09	4.71	3.40545	0.493171	5.14304	0.85	28344	2700000	9900000	1881	4.6	0.131424	0.992635	0.538616	0.03	0.36644	0.04191	0.049322	0.065723	0.026	80587	267.29	1	1	1	4.8443		8.0587
330200	2003	332203	宁波市	0	5.86	1.1768	0.172727	0.80108	0.03	13797	539000	3000000	379	0.12	0.100878	0.773441	0.163667		0.0714439	5.8e-05	0.001309	3e-05	3.1e-06	14277	230.41	0	1	1	0.0441	0.1724	1.4277
330200	2004	332204	宁波市	0.03	5.9	1.15086	0.210332	0.96425	0.04	15826	625140	3100000	421	0.15	0.100068	0.702705	0.172157	0	0.0772339	0.024044	0.0037	0.001813	5e-07	15882	230.55	0	1	1	0.0546	0.201	1.5882
330200	2005	332205	宁波市	0	5.94	1.20841	0.231097	1.10548	0.04	17308	714500	3300000	467	0.21	0.108102	0.802115	0.189269	0.03	0.0818214	0.000173	0.003201	0.009999	3.8e-05	17408	233.43	0	1	1	0.0778	0.2352	1.7408
330200	2006	332206	宁波市	0	5.98	1.29677	0.243018	1.21263	0.05	20305	735865	3600000	515	0.26	0.101827	0.879339	0.216546	0	0.0900203	0.000213	0.003578	0.00315	0.008276	19674	234.21	0	1	1	0.1225	0.2685	1.9674
330200	2007	332207	宁波市	0	5.75	1.44339	0.250518	1.26094	0.05	22931	820154	3800000	758	0.34	0.108017	0.887025	0.229134	0	0.100511	0	6.8e-05	0.009115	0.000568	22307	234.91	0	1	1	0.1784	0.3074	2.2307
330200	2008	332208	宁波市	0.03	5.79	1.43047	0.253789	1.3044	0.06	25720	2100000	4000000	822	0.4	0.110848	0.888439	0.233729	0	0.10749	0.000506	0.028349	0.028577	3e-06	25304	235.12	0	1	1	0.2671	0.3465	2.5304
330200	2009	332209	宁波市	0.05	5.82	1.78225	0.220541	1.35098	0.07	29028	1800000	4300000	867	0.5	0.116896	0.855203	0.23757	0.03	0.109057	0.000429	0.048383	0.048138	0.002016	27368	235.96	0	1	1	0.3856	0.3962	2.7368
330200	2010	332210	宁波市	0.06	5.85	0.64152	0.232336	1.40818	0.08	31377	2200000	4600000	846	0.61	0.116356	0.883783	0.250852	0.05	0.121569	0.000494	0.055394	0.055577	6.2e-05	30166.4	234.89	0	1	1	0.4525	0.4624	3.01664
330200	2011	332211	宁波市	0.12	5.87	1.76208	0.280929	1.44424	0.09	32020	1100000	4900000	1029	0.75	0.123897	0.875893	0.26569	0.06	0.133217	0.010765	0.110551	0.120949	0.000149	34058.3	235.3	0	1	1	0.6692	0.51808	3.40583
330200	2012	332212	宁波市	0.09	5.89	1.7168	0.285252	1.45358	0.11	33286	1200000	5200000	1088	0.91	0.125861	0.875739	0.28217	0.12	0.148129	0.006871	0.085913	0.021603	0.000353	37901.8	237.41	0	1	1	1.0445	0.574832	3.79018
330200	2013	332213	宁波市	0.05	5.91	1.75249	0.327483	1.48954	0.13	36145	1200000	5500000	1228	1.1	0.131843	0.843508	0.305344	0.09	0.161698	0.019756	0.033959	0.049718	0.000122	41729	238.78	0	1	1	1.2197	0.62258	4.1729
330200	2014	332214	宁波市	0.07	5.95	1.78845	0.402514	1.50854	0.15	40406	1200000	5900000	1267	1.3	0.131514	0.859875	0.307883	0.05	0.171019	0.013474	0.060564	0.071989	0.001119	44155	239.43	0	1	1	1.1636	0.6973	4.4155
330200	2015	332215	宁波市	0.09	5.98	1.87002	0.423375	1.55767	0.17	43677	1200000	6200000	1257	1.6	0.156509	0.803431	0.315508	0.07	0.172153	0.030698	0.05779	0.08563	0.001156	47852	240.68	0	1	1	1.4422	0.792	4.7852
330200	2016	332216	宁波市	0.06	6	1.81969	0.451333	1.55144	0.21	47017	1200000	6700000	1210	1.9	0.148421	0.864481	0.327248	0.09	0.183715	0.015722	0.040149	0.049459	0.001647	51560	240.75	0	1	1	1.4884	0.919838	5.156
330200	2017	332217	宁波市	0.07	6.01	1.74001	0.402995	1.5611	0.24	50413	1200000	7100000	1219	2.3	0.143324	0.882804	0.341034	0.06	0.196102	0.012361	0.058131	0.060984	0.000722	55656	241.4	0	1	1	1.8018	1.09103	5.5656
330200	2018	332218	宁波市	0.1	6.03	1.79993	0.432017	1.49804	0.28	53852	1200000	7800000	1259	2.7	0.148351	0.865496	0.353766	0.07	0.211209	0.023561	0.081242	0.096173	0.00219	60134	242.05	0	1	1	2.017	1.24273	6.0134
330200	2019	332219	宁波市	0.09	6.05	1.81679	0.236341	1.56455	0.32	57324	1100000	8100000	1358	3.3	0.147509	0.830656	0.377879	0.1	0.234745	0.015608	0.072918	0.078819	0.009707	64886	245.37	0	1	1	1.9806	1.39467	6.4886
330200	2020	332220	宁波市	0.07	6.06	2.01886	0.189822	1.6831	0.37	60815	1200000	8600000	1366	3.9	0.140389	0.86726	0.387723	0.09	0.237116	0.009219	0.057854	0.0501	0.017	68008	247.65	0	1	1	2.1822	1.9561	6.8008
330200	2021	332221	宁波市	0	6.08	1.95363	0.158891	1.74118	0.41	64316	1300000	9200000	1375	4.6	0.133225	0.886199	0.406992	0.07	0.261941	0.000328	0.000855	0.002395	0.000495	73869	246.18	0	1	1	2.138	0.51511	7.3869
330200	2022	332222	宁波市	0.01	6.1	2.06172	0.137535	1.79313	0.46	67815	1500000	9800000	1385	5.3	0.139316	0.767996	0.421172	0	0.274679	0.005295	0.006265	0.002367	0.000761	76690	246.93	0	1	1	2.092	0.508	7.669
330200	2023	332223	宁波市	0.05	6.11	2.28885	0.122334	1.86501	0.52	71301	1700000	10000000	1411	6.3	0.135847	0.799007	0.439049	0.01	0.291662	0.010721	0.03872	0.038064	0.011	80000	248.51	0	1	1	2.0391	0.65795	8
330300	2003	332303	温州市	0	6.3	1.07053	0.011969	0.39868	0.11	8625	580351	1800000	342	0.06	0.060553	1.0633	0.160226		0.0389779	2.8e-05	0.003229	3.3e-05	6e-07	16035	232.41	0	1	1	0.0412	0.0769	1.6035
330300	2004	332304	温州市	0	6.33	1.09387	0.020916	0.4533	0.11	10728	625892	1900000	407	0.08	0.059395	1.02851	0.166417	0	0.0418334	0.001773	0.001813	0.000607	1.3e-05	17727	233	0	1	1	0.0478	0.1052	1.7727
330300	2005	332305	温州市	0	6.37	1.07187	0.035708	0.49947	0.11	15349	671844	2000000	448	0.1	0.058503	1.17369	0.174668	0	0.0445043	1e-06	0.000705	0.014635	1.2e-05	19805	236.55	0	1	1	0.0637	0.1401	1.9805
330300	2006	332306	温州市	0.01	6.42	1.20035	0.046273	0.56811	0.11	16044	781529	2100000	682	0.12	0.0782	0.896209	0.172274	0	0.0483278	0.000155	0.012812	0.003459	0.009816	21716	237.09	0	1	1	0.0935	0.1843	2.1716
330300	2007	332307	温州市	0.02	6.49	1.26044	0.061753	0.64037	0.11	17861	876575	2200000	745	0.15	0.081979	0.887234	0.178286	0.01	0.0529094	0.002909	0.014796	3.6e-05	5.9e-05	20922	238.46	0	1	1	0.097	0.2192	2.0922
330300	2008	332308	温州市	0.01	6.55	1.36332	0.026175	0.7117	0.11	18309	960137	2400000	771	0.18	0.086486	0.859199	0.183761	0.02	0.056462	0.000311	0.006712	0.006292	0.007332	22851	239.6	0	1	1	0.1331	0.2547	2.2851
330300	2009	332309	温州市	0.02	6.61	1.77525	0.023448	0.74239	0.11	10481	993362	2500000	859	0.22	0.099535	0.777724	0.187612	0.01	0.0588224	0.000397	0.021435	0.021786	0.002025	24466.8	240.64	0	1	1	0.1658	0.2931	2.44668
330300	2010	332310	温州市	0.04	6.68	1.88602	0.017574	0.74542	0.11	11672	1100000	2700000	977	0.26	0.106247	0.735231	0.204933	0.02	0.0682123	0.001121	0.036585	0.037421	6.3e-06	27250	240.17	0	1	1	0.221	0.3537	2.725
330300	2011	332311	温州市	0.05	6.77	1.87067	0.010215	0.75019	0.11	12263	1100000	2800000	952	0.32	0.108364	0.731189	0.212567	0.04	0.0723036	0.000254	0.054135	0.054103	0.00198	31749	241.2	0	1	1	0.3341	0.4123	3.1749
330300	2012	332312	温州市	0.02	6.74	1.864	0.039836	0.76547	0.11	11916	1200000	3000000	1110	0.39	0.105687	0.746911	0.219752	0.05	0.0775662	0.001157	0.021463	0.018	0.000102	34820.3	242.28	0	1	1	0.472	0.4887	3.48203
330300	2013	332313	温州市	0.01	6.85	1.77137	0.05015	0.79158	0.11	11421	1200000	3200000	1185	0.48	0.109384	0.739743	0.231286	0.02	0.0831203	0.002111	0.011918	0.013072	0.00024	37266	242.9	0	1	1	0.5603	0.5677	3.7266
330300	2014	332314	温州市	0.02	6.74	1.67873	0.053267	0.81612	0.11	11740	1200000	3300000	1113	0.58	0.113636	0.720939	0.247409	0.01	0.100862	0.001318	0.018499	0.018417	0.009632	40510	246.35	0	1	1	0.6763	0.6358	4.051
330300	2015	332315	温州市	0.02	6.71	1.62993	0.030123	0.8379	0.11	11751	1200000	3600000	1122	0.71	0.123304	0.707855	0.25761	0.02	0.0942822	0.000761	0.023323	0.023566	0.000319	44026	249.61	0	1	1	0.8817	0.7576	4.4026
330300	2016	332316	温州市	0.02	6.72	1.5704	0.02433	0.86276	0.11	11761	1200000	3800000	1115	0.86	0.130695	0.65973	0.267451	0.02	0.0990768	0.001602	0.016134	0.017151	0.001693	47785	252.43	0	1	1	1.1687	0.8824	4.7785
330300	2017	332317	温州市	0.05	6.74	1.58995	0.035822	0.8868	0.11	11770	1100000	4000000	1165	1.1	0.140737	0.611008	0.2756	0.02	0.104377	0.002144	0.04751	0.048419	0.0012	51866	253.545	0	1	1	1.2172	1.02371	5.1866
330300	2018	332318	温州市	0.04	6.75	1.66005	0.052307	0.8881	0.11	11778	1200000	4200000	1239	1.3	0.14554	0.62642	0.285825	0.05	0.11302	0.006057	0.036918	0.041142	0.003138	56097	254.66	0	1	1	1.2915	1.1861	5.6097
330300	2019	332319	温州市	0.06	6.76	1.74532	0.075842	1.04298	0.14	11785	1200000	4400000	1216	1.6	0.164112	0.534046	0.290073	0.04	0.121357	0.004136	0.056978	0.059652	0.001463	60957	251.86	0	1	1	1.1652	1.367	6.0957
330300	2020	332320	温州市	0.06	6.77	1.97429	0.087932	1.20734	0.15	11792	1300000	4800000	1221	1.9	0.149493	0.586059	0.296818	0.06	0.126104	0.034793	0.028632	0.058333	0.005092	63481	253.12	0	1	1	1.536	1.19391	6.3481
330300	2021	332321	温州市	0.01	6.78	2.07718	0.093641	1.27533	0.15	11798	1500000	5100000	1226	2.3	0.140648	0.616372	0.307065	0.06	0.136714	0.002005	0.00605	0.004962	0.001549	69678	252.55	0	1	1	1.3584	0.49566	6.9678
330300	2022	332322	温州市	0	6.79	2.24534	0.09618	1.35853	0.15	11804	1500000	5500000	1340	2.8	0.141686	0.504379	0.314794	0.01	0.141863	0.001765	0.001093	0.004197	0.000275	73326	252.48	0	1	1	1.1729	0.4686	7.3326
330300	2023	332323	温州市	0.02	6.8	2.38376	0.09728	1.3982	0.15	11809	1600000	5800000	1282	3.5	0.134686	0.529519	0.326909	0	0.150481	0.012393	0.008721	0.016158	0.004956	77973	253.57	0	1	1	1.2327		7.7973
330400	2003	332403	嘉兴市	0	8.5	0.883222	0.079768	0.18677	0.03	7344	246779	1900000	150	0.05	0.055053	0.872576	0.132067		0.0385607	0	0.003989	0.016353	0.000173	12954	223.78	0	1	1	0.0094	0.0905	1.2954
330400	2004	332404	嘉兴市	0	8.53	0.835136	0.102187	0.17665	0.03	7919	321713	2100000	212	0.06	0.056844	0.919201	0.141824	0	0.0428826	0	0.001813	0.000603	6.3e-05	14693	223.73	0	1	1	0.0121	0.1117	1.4693
330400	2005	332405	嘉兴市	0.01	8.54	0.828264	0.115666	0.21298	0.03	9456	381455	2200000	244	0.09	0.063338	0.909348	0.14862	0	0.0453511	0.001637	0.008683	0.028312	0.002372	16189	225.61	0	1	1	0.0298	0.1363	1.6189
330400	2006	332406	嘉兴市	0	8.57	0.850043	0.122178	0.2554	0.04	10084	448246	2400000	315	0.11	0.064121	0.944402	0.164554	0.01	0.0492237	0.00034	0.00332	0.004542	0.00031	17828	225.96	0	1	1	0.031	0.1595	1.7828
330400	2007	332407	嘉兴市	0.01	8.6	0.852536	0.166228	0.30173	0.04	10463	499296	2500000	334	0.13	0.067761	0.979636	0.174377	0	0.0560752	2.9e-05	0.010298	0.029319	1e-05	20128	226.85	0	1	1	0.0429	0.185	2.0128
330400	2008	332408	嘉兴市	0	8.64	0.883515	0.135975	0.36832	0.04	10670	562707	2700000	357	0.16	0.074875	0.933413	0.176874	0.01	0.0590665	4e-05	0.000376	6.9e-05	0.00067	22481	227.59	0	1	1	0.0735	0.214	2.2481
330400	2009	332409	嘉兴市	0.02	8.67	1.18802	0.13346	0.38932	0.05	10783	622905	2900000	425	0.19	0.084	0.879528	0.186071	0	0.0621156	0.002754	0.016546	0.019226	0.000171	24693	229.78	0	1	1	0.1011	0.2492	2.4693
330400	2010	332410	嘉兴市	0.03	8.73	1.19713	0.160994	0.52351	0.05	16004	664372	3100000	494	0.22	0.086542	0.888309	0.196388	0.02	0.0691935	0.000253	0.02755	0.027749	5.3e-05	27487	229.72	0	1	1	0.1386	0.307	2.7487
330400	2011	332411	嘉兴市	0.1	8.76	1.20009	0.172066	0.56821	0.06	16869	740943	3300000	514	0.26	0.089879	0.940933	0.207664	0.03	0.0756761	0.000612	0.101651	0.102045	0.001544	31520	230.89	0	1	1	0.1842	0.3536	3.152
330400	2012	332412	嘉兴市	0.02	8.8	1.18299	0.178159	0.60753	0.07	16876	789241	3500000	545	0.29	0.090191	0.988604	0.222279	0.1	0.0850828	0.000271	0.01824	0.029461	0.000207	35696	233.06	0	1	1	0.2598	0.4101	3.5696
330400	2013	332413	嘉兴市	0.01	8.84	1.22631	0.220676	0.63731	0.07	17267	832749	3700000	561	0.32	0.096377	0.930598	0.24162	0.02	0.0943537	0.002096	0.012403	0.013803	9.1e-05	38671	234.26	0	1	1	0.3715	0.466	3.8671
330400	2014	332414	嘉兴市	0.01	8.89	1.31037	0.249577	0.65722	0.08	18185	810134	4000000	615	0.36	0.099893	0.916885	0.24887	0.01	0.102629	0.004229	0.006852	0.009901	0.000456	42143	236.26	0	1	1	0.4156	0.5219	4.2143
330400	2015	332415	嘉兴市	0.03	8.91	1.34127	0.268427	0.52713	0.09	19803	779187	4200000	602	0.39	0.120567	0.826026	0.259517	0.01	0.102294	0.001461	0.027214	0.027353	0.003619	45499	238.49	0	1	1	0.6288	0.631001	4.5499
330400	2016	332416	嘉兴市	0.02	8.95	1.34259	0.26924	0.65441	0.11	21565	879175	4500000	608	0.42	0.114495	0.877297	0.270692	0.03	0.107884	0.001344	0.020294	0.02074	0.000369	48926	239.87	0	1	1	0.7375	0.789381	4.8926
330400	2017	332417	嘉兴市	0.05	8.98	1.36374	0.299452	0.69153	0.12	23484	845536	4800000	632	0.45	0.112932	0.897093	0.278094	0.02	0.116137	0.003209	0.047434	0.049921	0.000749	53057	240.14	0	1	1	0.9581	0.914329	5.3057
330400	2018	332418	嘉兴市	0.06	9.01	1.38972	0.31398	0.70711	0.14	25572	559827	5200000	720	0.48	0.120868	0.880593	0.290622	0.05	0.127494	0.00675	0.047886	0.053865	3.1e-05	57437	240.41	0	1	1	1.3526	1.0647	5.7437
330400	2019	332419	嘉兴市	0.05	9.04	1.49058	0.412541	0.72365	0.16	27847	578686	5400000	705	0.51	0.142809	0.737652	0.3025	0.06	0.138619	0.004515	0.041242	0.042845	0.002912	61940	240.66	0	1	1	1.1081	1.1971	6.194
330400	2020	332420	嘉兴市	0.05	9.07	1.81963	0.578267	0.76304	0.2	30323	618404	5800000	706	0.54	0.129253	0.840795	0.311599	0.05	0.141715	0.001743	0.042865	0.041323	0.003286	64124	242.58	0	1	1	1.3012	1.0104	6.4124
330400	2021	332421	嘉兴市	0.01	9.11	1.89877	0.794492	0.78999	0.23	33018	658123	6300000	706	0.56	0.124897	0.850171	0.327668	0.05	0.158261	0.004343	0.002258	0.001629	0.000171	69839	240.55	0	1	1	1.2563	0.32153	6.9839
330400	2022	332422	嘉兴市	0	9.13	2.09206	1.1	0.81043	0.28	35953	793322	6800000	726	0.59	0.122823	0.720636	0.338183	0.01	0.165257	0.001495	0.00347	0.001015	0.000136	72096	239.53	0	1	1	1.1383	0.3056	7.2096
330400	2023	332423	嘉兴市	0.03	9.16	2.31427	1.4	0.82515	0.33	39149	844083	7200000	782	0.61	0.117104	0.764243	0.353683	0	0.174591	0.013346	0.013231	0.019155	0.007422	75909	241.52	0	1	1	1.1147		7.5909
330500	2003	332503	湖州市	0	4.41	0.744678	0.053734	0.12051	0.01	10978	134526	621516	100	0.02	0.062093	0.829082	0.131695		0.0261895	0.000604	0.000468	0.069713	0.000524	12607	223.08	0	1	1	0.0046	0.070444	1.2607
330500	2004	332504	湖州市	0	4.42	0.678314	0.061121	0.14269	0.01	12152	161738	658173	133	0.03	0.061812	0.913787	0.133395	0	0.0281167	0	0.001019	0.000903	5e-05	13487	222.26	0	1	1	0.0059	0.085094	1.3487
330500	2005	332505	湖州市	0.02	4.43	0.704257	0.065072	0.16406	0.01	13811	177359	700118	150	0.04	0.068427	0.901254	0.152081	0	0.0310461	4.1e-05	0.01487	0.044797	0.008835	15375	224.61	0	1	1	0.0176	0.107838	1.5375
330500	2006	332506	湖州市	0	4.43	0.721084	0.075702	0.18795	0.01	15591	199103	748339	177	0.05	0.0735	0.890185	0.156136	0.02	0.0341679	0	0.00315	0.000264	0.000565	17503	224.58	0	1	1	0.0177	0.128827	1.7503
330500	2007	332507	湖州市	0	4.43	0.735303	0.084363	0.21096	0.02	16379	226506	804053	193	0.06	0.077148	0.896248	0.163488	0	0.0391349	0.000236	0.000124	0.001166	7.6e-05	19663	226.14	0	1	1	0.0276	0.16675	1.9663
330500	2008	332508	湖州市	0.02	4.44	0.749683	0.080206	0.23468	0.02	16604	243250	868774	202	0.07	0.083503	0.828675	0.166415	0	0.0424175	0.006475	0.016378	0.022082	0.000409	21604	225.66	0	1	1	0.0497	0.194843	2.1604
330500	2009	332509	湖州市	0.04	4.45	1.04437	0.081095	0.24409	0.02	16353	252537	944398	246	0.09	0.098482	0.737356	0.175084	0.02	0.0456742	0.00902	0.033374	0.042099	0.000173	23280.3	227.58	0	1	1	0.0753	0.232169	2.32803
330500	2010	332510	湖州市	0.08	4.47	1.1226	0.091905	0.24768	0.02	18108	260847	1000000	287	0.1	0.097655	0.765142	0.183421	0.04	0.0507226	0.006127	0.070203	0.07628	8.1e-05	25729	228.08	0	1	1	0.0851	0.285568	2.5729
330500	2011	332511	湖州市	0.04	4.49	1.12639	0.094038	0.25329	0.03	20103	283046	1100000	322	0.12	0.099821	0.804829	0.193632	0.08	0.0561273	0.000481	0.034475	0.03495	0.000153	29367.1	229.91	0	1	1	0.1484	0.351953	2.93671
330500	2012	332512	湖州市	0.03	4.49	1.11295	0.102599	0.26153	0.03	19467	312329	1300000	324	0.14	0.100647	0.827131	0.204451	0.04	0.0632037	0.001046	0.028796	0.042029	0.000542	32986.9	231	0	1	1	0.2209	0.41908	3.29869
330500	2013	332513	湖州市	0.04	4.51	1.18982	0.10586	0.26673	0.04	16628	315944	1400000	366	0.17	0.092897	0.923329	0.21559	0.03	0.0686968	0.001085	0.034597	0.035151	1.3e-05	35750	232.19	0	1	1	0.3243	0.490345	3.575
330500	2014	332514	湖州市	0.02	4.53	1.18863	0.098419	0.26988	0.04	13202	308693	1600000	383	0.19	0.114809	0.747394	0.225641	0.04	0.0774843	0.003591	0.016576	0.018508	0.002419	38959	235.62	0	1	1	0.4414	0.589647	3.8959
330500	2015	332515	湖州市	0.01	4.54	1.20418	0.094188	0.32199	0.05	11651	312966	1800000	450	0.22	0.131337	0.698879	0.239122	0.02	0.0797769	0.000794	0.011525	0.011395	0.000732	42238	238	0	1	1	0.485	0.700024	4.2238
330500	2016	332516	湖州市	0.03	4.54	1.19961	0.100131	0.26668	0.06	10563	326084	2100000	456	0.26	0.126344	0.731694	0.246547	0.01	0.0844775	0.000811	0.029219	0.027935	0.000866	45794	239.71	0	1	1	0.5761	0.875219	4.5794
330500	2017	332517	湖州市	0.02	4.54	1.31933	0.10532	0.26383	0.07	9780	360328	2400000	443	0.3	0.131261	0.730516	0.2595	0.03	0.0918974	0.002203	0.014162	0.015165	0.0031	49934	241.235	0	1	1	0.7334	1.05526	4.9934
330500	2018	332518	湖州市	0.03	4.54	1.42385	0.127143	0.26941	0.08	9206	364639	2700000	503	0.34	0.146206	0.722175	0.269483	0.02	0.100493	0.002881	0.027421	0.029646	0.004608	54393	242.76	0	1	1	0.8904	1.16294	5.4393
330500	2019	332519	湖州市	0.02	4.54	1.54339	0.189881	0.28834	0.09	8780	383080	3000000	463	0.39	0.149541	0.677005	0.284394	0.03	0.111501	0.005046	0.018501	0.020933	0.002614	59028	239.38	0	1	1	0.6206	1.31976	5.9028
330500	2020	332520	湖州市	0.02	4.54	1.85051	0.24202	0.3377	0.1	8459	426920	3200000	454	0.45	0.151335	0.694757	0.287737	0.02	0.113738	0.00197	0.016421	0.014415	0.003976	61743	240.65	0	1	1	0.8009	1.12106	6.1743
330500	2021	332521	湖州市	0	4.54	1.97148	0.287045	0.37405	0.11	8215	470759	3400000	445	0.51	0.143894	0.788415	0.305414	0.02	0.126264	0.000164	0.00019	0.004588	0.00036	67983	239.68	0	1	1	0.6072	0.36315	6.7983
330500	2022	332522	湖州市	0	4.54	2.28177	0.323636	0.39067	0.12	8028	520972	3600000	460	0.57	0.156343	0.643435	0.312686	0	0.131922	0.000683	0.000742	0.003489	0.009157	71044	239.55	0	1	1	0.6316	0.284	7.1044
330500	2023	332523	湖州市	0.02	4.54	2.62361	0.352127	0.41134	0.14	7885	552845	3800000	448	0.65	0.151176	0.676304	0.329211	0	0.140136	0.001907	0.015516	0.014539	0.002884	74400	241.8	0	1	1	0.6101		7.44
330600	2003	332603	绍兴市	0	5.25	0.905912	0.074271	0.19344	0.12	8032	259303	1800000	150	0.08	0.052378	0.884849	0.127651		0.0409393	0	0.002408	0.00845	0.000341	13152	224.66	0	1	1	0.0175	0.1028	1.3152
330600	2004	332604	绍兴市	0	5.27	0.89565	0.082344	0.25034	0.12	10307	132230	1900000	179	0.12	0.049096	0.78941	0.136484	0	0.0440041	3e-07	0.000603	0.000604	0.000465	15642	225.08	0	1	1	0.0207	0.1211	1.5642
330600	2005	332605	绍兴市	0.03	5.27	0.966693	0.090095	0.30702	0.12	9698	314395	2000000	244	0.15	0.055296	0.951196	0.140492	0	0.0463326	5.4e-05	0.02826	0.006687	1e-05	17516	225.83	0	1	1	0.0265	0.1503	1.7516
330600	2006	332606	绍兴市	0	5.28	1.03289	0.097188	0.38332	0.12	10275	334209	2100000	266	0.18	0.056918	0.990157	0.166232	0.03	0.0507807	0.001235	0.002363	0.083981	0.00235	19486	226.85	0	1	1	0.0445	0.1808	1.9486
330600	2007	332607	绍兴市	0.03	5.28	1.04951	0.110476	0.44103	0.12	11178	377519	2200000	354	0.22	0.057687	1.07345	0.173928	0	0.0561349	0.027327	0.004669	0.005416	0.0001	21971	227.62	0	1	1	0.0605	0.2192	2.1971
330600	2008	332608	绍兴市	0.03	5.29	1.10722	0.084031	0.50258	0.12	11481	417663	2300000	334	0.27	0.064821	0.99654	0.180962	0.03	0.0604157	0.002959	0.02874	0.031369	0.000354	26464	228.71	0	1	1	0.0766	0.2435	2.6464
330600	2009	332609	绍兴市	0.04	5.3	1.41587	0.081117	0.52898	0.12	8666	431476	2500000	379	0.33	0.071361	0.946291	0.19028	0.03	0.0643136	0.000753	0.04241	0.04279	2.2e-05	26874.1	231.23	0	1	1	0.1098	0.2851	2.68741
330600	2010	332610	绍兴市	0.06	5.3	0.696093	0.095327	0.53869	0.12	9054	455558	2600000	513	0.4	0.079403	0.870614	0.200616	0.04	0.0698817	0.000941	0.060633	0.060811	0.004827	30163.8	232.25	0	1	1	0.1439	0.3436	3.01638
330600	2011	332611	绍兴市	0.04	5.33	1.33946	0.080468	0.56455	0.12	9021	498467	2800000	588	0.48	0.076023	0.946242	0.216602	0.06	0.0779324	0.00134	0.041829	0.042586	0.00209	33273	233.6	0	1	1	0.1825	0.4128	3.3273
330600	2012	332612	绍兴市	0.04	5.34	1.35034	0.0954	0.59758	0.12	9547	538925	3000000	664	0.57	0.076274	0.953529	0.22988	0.04	0.0861167	0.003087	0.040944	0.060311	0.00175	36911.5	235.2	0	1	1	0.3	0.4866	3.69115
330600	2013	332613	绍兴市	0.04	5.33	1.37319	0.080782	0.77532	0.12	9986	571128	3200000	686	0.67	0.07867	0.939009	0.242035	0.04	0.0941389	0.009523	0.026849	0.036021	0.00012	39567	236.25	0	1	1	0.338	0.5614	3.9567
330600	2014	332614	绍兴市	0.04	5.35	1.36511	0.06713	0.80348	0.12	11583	557053	3400000	692	0.78	0.081213	0.915792	0.257118	0.04	0.113559	0.001728	0.034107	0.035224	0.002511	43167	238.01	0	1	1	0.4127	0.6287	4.3167
330600	2015	332615	绍兴市	0.02	5.35	1.33167	0.094152	0.83831	0.12	11786	519632	3600000	705	0.91	0.094361	0.861138	0.262943	0.04	0.106346	0.001827	0.019714	0.020155	0.000831	46747	239.65	0	1	1	0.814	0.7202	4.6747
330600	2016	332616	绍兴市	0.02	5.35	1.27608	0.080031	0.90277	0.12	11894	541104	3900000	783	1.1	0.095238	0.855743	0.27479	0.02	0.111492	0.005904	0.015712	0.019969	0.000864	50305	240.27	0	1	1	1.0592	0.8288	5.0305
330600	2017	332617	绍兴市	0.03	5.35	1.31474	0.128666	0.97345	0.12	11951	531404	4100000	883	1.2	0.092516	0.918118	0.277211	0.02	0.116879	0.006446	0.02091	0.026607	0.000437	54445	241.905	0	1	1	1.3447	0.954112	5.4445
330600	2018	332618	绍兴市	0.03	5.35	1.37871	0.135141	0.9927	0.13	11981	561948	4400000	730	1.4	0.102761	0.900642	0.286603	0.03	0.123844	0.004912	0.026859	0.029581	0.00139	59049	243.54	0	1	1	1.0571	1.0879	5.9049
330600	2019	332619	绍兴市	0.02	5.35	1.47509	0.065739	1.04232	0.15	11996	551901	4600000	666	1.6	0.110858	0.824457	0.298133	0.03	0.136958	0.001725	0.019238	0.019374	0.00159	63935	243.84	0	1	1	0.978	1.1473	6.3935
330600	2020	332620	绍兴市	0.03	5.35	1.68233	0.044354	1.16744	0.18	12005	607474	4900000	638	1.8	0.111175	0.81467	0.310929	0.02	0.134929	0.003693	0.026324	0.027338	0.002679	66694	246.51	0	1	1	1.2141	0.972054	6.6694
330600	2021	332621	绍兴市	0	5.35	1.71797	0.033528	1.27376	0.19	12009	663046	5100000	609	2	0.105151	0.845071	0.320222	0.03	0.145891	0.001593	0.00217	0.00254	0.000305	73101	244.81	0	1	1	1.0325	0.27571	7.3101
330600	2022	332622	绍兴市	0	5.35	1.87867	0.027479	1.32849	0.19	12011	711235	5400000	704	2.3	0.10949	0.671037	0.328847	0	0.15276	0.00454	0.000341	0.003145	0.001539	76199	243.43	0	1	1	0.7972	0.2557	7.6199
330600	2023	332623	绍兴市	0.01	5.35	2.10999	0.023853	1.36176	0.19	12012	759926	5600000	722	2.5	0.099941	0.743278	0.344184	0	0.161977	0.002289	0.004285	0.004744	0.00183	80392	245	0	1	1	0.7356		8.0392
330700	2003	332703	金华市	0	4.12	1.08245	0.02575	0.43683	0.01	9811	346982	1100000	197	0.04	0.067534	0.796709	0.125865		0.0309446	0.000115	0.002408	0.002453	0.000821	12445	228.97	0	1	1	0.016	0.08532	1.2445
330700	2004	332704	金华市	0	4.14	1.09501	0.042983	0.41418	0.01	11218	454060	1200000	240	0.05	0.069732	0.750894	0.128866	0	0.0331108	0	0.000933	0.001205	0.00015	13910	229.36	0	1	1	0.0267	0.1199	1.391
330700	2005	332705	金华市	0.08	4.16	1.11697	0.045775	0.47153	0.01	11503	570652	1300000	290	0.07	0.075916	0.842728	0.155853	0	0.0368896	0.057174	0.020913	0.008462	0.003456	15378	233.52	0	1	1	0.0438	0.1384	1.5378
330700	2006	332706	金华市	0.01	4.18	1.08893	0.051013	0.51871	0.01	13267	417253	1400000	336	0.09	0.075936	0.868682	0.166585	0.08	0.0402205	0.000926	0.004496	0.00569	0.000891	17806	234.1	0	1	1	0.0527	0.1611	1.7806
330700	2007	332707	金华市	0	4.2	1.1127	0.05061	0.60973	0.01	15441	479658	1500000	417	0.12	0.079247	0.8779	0.17464	0.01	0.045648	0.00016	0.00235	0.0062	0.003314	19855	234.27	0	1	1	0.0553	0.18559	1.9855
330700	2008	332708	金华市	0	4.22	1.12668	0.05132	0.69788	0.01	16132	520248	1600000	425	0.14	0.081801	0.870091	0.179715	0	0.0491859	4e-05	0.00207	5.8e-05	8.2e-05	21408	234.65	0	1	1	0.0676	0.20272	2.1408
330700	2009	332709	金华市	0.04	4.24	1.41343	0.040034	0.75429	0.02	7278	554009	1700000	528	0.16	0.093105	0.781783	0.186528	0	0.0518709	0	0.03644	0.036288	0.002554	22914.9	236.89	0	1	1	0.0884	0.235604	2.29149
330700	2010	332710	金华市	0.03	4.27	1.46749	0.035263	0.76733	0.02	11803	593348	1900000	701	0.17	0.100243	0.737174	0.195735	0.04	0.0573565	2e-05	0.03229	0.032189	0.02	26023	237.29	0	1	1	0.1138	0.288271	2.6023
330700	2011	332711	金华市	0.05	4.29	1.49665	0.023315	0.77404	0.02	12585	651815	2100000	707	0.19	0.095636	0.790235	0.210978	0.03	0.0651413	0.004645	0.045851	0.050175	0.00022	29699	238.08	0	1	1	0.2237	0.353136	2.9699
330700	2012	332712	金华市	0.06	4.3	1.56204	0.028314	0.78845	0.02	12913	706038	2200000	950	0.21	0.100323	0.790169	0.220245	0.05	0.0706145	0.008319	0.05259	0.035893	0.000226	33130	239.47	0	1	1	0.2504	0.410514	3.313
330700	2013	332713	金华市	0.03	4.33	1.70399	0.024905	0.81281	0.03	12363	736882	2400000	985	0.22	0.108913	0.752438	0.240584	0.06	0.0798155	0.0016	0.024922	0.024148	0.000178	36386	240.66	0	1	1	0.2372	0.483436	3.6386
330700	2014	332714	金华市	0.03	4.34	1.76023	0.02784	0.86725	0.03	7965	732874	2600000	918	0.23	0.109988	0.761956	0.255329	0.03	0.0952321	0.004327	0.028238	0.031749	0.00373	39807	243.37	0	1	1	0.217	0.589788	3.9807
330700	2015	332715	金华市	0.03	4.37	1.77572	0.027431	0.34976	0.04	8998	737681	2900000	921	0.25	0.136488	0.666886	0.263564	0.03	0.0925551	0.003661	0.025471	0.02752	3e-05	43193	245.17	0	1	1	0.2718	0.698967	4.3193
330700	2016	332716	金华市	0.02	4.39	1.67368	0.034329	0.34566	0.05	8884	771357	3100000	946	0.26	0.147183	0.623459	0.273868	0.03	0.0981628	0.003337	0.017695	0.019339	0.000514	46554	246.37	0	1	1	0.3809	0.863237	4.6554
330700	2017	332717	金华市	0.02	4.41	1.73609	0.043044	0.75378	0.06	8896	737437	3400000	1030	0.27	0.139449	0.666512	0.281063	0.02	0.102783	0.004762	0.019196	0.020858	0.0015	50653	248.09	0	1	1	0.5479	1.02994	5.0653
330700	2018	332718	金华市	0.04	4.42	1.7914	0.031854	0.7748	0.07	8894	782664	3700000	1373	0.28	0.139992	0.684011	0.293452	0.02	0.109806	0.016564	0.025228	0.038654	0.000574	54883	249.81	0	1	1	0.7196	1.2018	5.4883
330700	2019	332719	金华市	0.05	4.43	1.83754	0.021657	0.81338	0.08	8894	802129	3900000	951	0.29	0.145686	0.619122	0.311063	0.04	0.120854	0.006095	0.041276	0.044403	0.002969	59348	252.4	0	1	1	0.7109	1.3913	5.9348
330700	2020	332720	金华市	0.04	4.45	2.11507	0.015873	1.04648	0.1	8894	896371	4300000	967	0.29	0.149535	0.601711	0.312001	0.05	0.120815	0.004387	0.035002	0.03706	0.002329	61545	253.76	0	1	1	0.826	1.1812	6.1545
330700	2021	332721	金华市	0.01	4.46	2.15182	0.012186	1.05483	0.11	8894	990613	4700000	983	0.3	0.147789	0.622084	0.320093	0.04	0.131213	0.003363	0.002188	0.000125	0.002154	67374	252.15	0	1	1	0.7004	0.43266	6.7374
330700	2022	332722	金华市	0.01	4.46	2.44756	0.009732	1.06936	0.12	8894	1100000	5100000	1002	0.3	0.149298	0.589072	0.326203	0.01	0.136387	0.001916	0.003139	0.00041	3e-05	69626	251.32	0	1	1	0.5812	0.383	6.9626
330700	2023	332723	金华市	0.03	4.47	2.64363	0.008038	1.11244	0.14	8894	1100000	5500000	1047	0.31	0.141154	0.619694	0.347893	0.01	0.146809	0.014865	0.013813	0.014426	0.014	73639	254.42	0	1	1	0.6068		7.3639
330800	2003	332803	衢州市	0	2.77	1.08957	0.002069	0.0716	0.01	5002	114892	425170	47	0.01	0.115688	0.519164	0.115187		0.0207121	7.3e-07	0.004405	0.027328	5e-07	10079	217.39	0	1	1	0.002	0.03228	1.0079
330800	2004	332804	衢州市	0	2.78	1.03047	0.00208	0.08183	0.01	6857	143230	453870	61	0.01	0.118004	0.509964	0.12362	0	0.0235722	1e-06	0.000603	0.001827	0.00586	11477	217.59	0	1	1	0.0028	0.042	1.1477
330800	2005	332805	衢州市	0.01	2.78	0.949026	0.003042	0.09633	0.01	7648	153147	486146	77	0.02	0.113392	0.536404	0.13468	0	0.0255864	0.0002	0.006748	0.010504	2.3e-05	13006	222.78	0	1	1	0.0051	0.053	1.3006
330800	2006	332806	衢州市	0	2.79	0.918899	0.003985	0.09182	0.01	8743	177349	522569	95	0.02	0.112745	0.538607	0.141728	0.01	0.0271953	1e-06	0.000264	0.00717	0.00024	14541	223.27	0	1	1	0.0109	0.065	1.4541
330800	2007	332807	衢州市	0.01	2.8	0.849134	0.004056	0.09621	0.01	9382	227795	563824	129	0.02	0.115999	0.528829	0.144952	0	0.0300098	0.00072	0.005546	0.000293	0.02	16388	223.91	0	1	1	0.0124	0.087	1.6388
330800	2008	332808	衢州市	0.14	2.81	0.816646	0.005813	0.10211	0.01	9840	245644	610729	141	0.03	0.117114	0.506232	0.144927	0.01	0.0320239	0.105697	0.031611	0.111424	0.001371	18069	222.92	0	1	1	0.0174	0.1059	1.8069
330800	2009	332809	衢州市	0.01	2.83	1.00068	0.00638	0.10186	0.01	6657	243471	664275	153	0.04	0.152254	0.396795	0.152197	0.14	0.0334298	0.003472	0.009478	0.012927	5e-07	19539.1	227.17	0	1	1	0.0269	0.12719	1.95391
330800	2010	332810	衢州市	0.02	2.84	1.04334	0.006237	0.10213	0.01	9112	317713	725662	170	0.04	0.141746	0.438692	0.155376	0.01	0.0375332	0.000982	0.01495	0.015647	0.000137	21811	227.02	0	1	1	0.0299	0.16393	2.1811
330800	2011	332811	衢州市	0.02	2.86	1.01619	0.004541	0.10917	0.01	8561	357713	796351	199	0.05	0.136406	0.458961	0.169217	0.02	0.0431512	0	0.024366	0.024336	0.001871	24900	226.87	0	1	1	0.0376	0.20799	2.49
330800	2012	332812	衢州市	0.04	2.86	1.09476	0.005067	0.11687	0.01	8736	145000	878135	208	0.06	0.142858	0.456576	0.181127	0.02	0.0493726	0.000269	0.035624	0.012037	0.000111	26231.9	229.49	0	1	1	0.0632	0.25167	2.62319
330800	2013	332813	衢州市	0.02	2.87	1.17078	0.006616	0.12937	0.01	8584	161885	973225	201	0.07	0.156648	0.439572	0.185662	0.04	0.0489371	2.1e-05	0.017245	0.016971	0.000116	27981	230.67	0	1	1	0.0745	0.32779	2.7981
330800	2014	332814	衢州市	0	2.89	1.30434	0.007009	0.13664	0.01	9201	151148	1100000	280	0.09	0.172128	0.418484	0.202899	0.02	0.0633609	0.000486	0.003471	0.003607	0.000335	30583	234.06	0	1	1	0.101	0.36712	3.0583
330800	2015	332815	衢州市	0	2.89	1.38205	0.006006	0.13681	0.01	9684	183351	1200000	288	0.1	0.20126	0.407572	0.213521	0	0.0584224	0.000115	0.000345	0.000105	0.001107	33212	237.6	0	1	1	0.1325	0.43702	3.3212
330800	2016	332816	衢州市	0	2.9	1.32028	0.006109	0.13523	0.02	10185	167720	1400000	225	0.12	0.214195	0.382549	0.224017	0	0.0618898	3e-05	0.003166	0.002827	0.014	36188	239.79	0	1	1	0.1986	0.5336	3.6188
330800	2017	332817	衢州市	0.01	2.92	1.44372	0.007396	0.16022	0.02	10704	165726	1600000	238	0.14	0.225698	0.370371	0.228493	0	0.0649584	0.000251	0.008812	0.008626	0.000792	39577	241.385	0	1	1	0.2379	0.647911	3.9577
330800	2018	332818	衢州市	0.01	2.93	1.52328	0.007431	0.14413	0.02	11242	175824	1700000	253	0.16	0.242042	0.359879	0.239509	0.01	0.0702427	5.3e-05	0.012823	0.012845	0.007066	43126	242.98	0	1	1	0.1986	0.745386	4.3126
330800	2019	332819	衢州市	0.02	2.94	1.6231	0.007779	0.16409	0.03	11798	214039	1800000	245	0.18	0.285262	0.305398	0.253802	0.01	0.0769194	8.6e-05	0.020712	0.017027	0.003771	46933	246.57	0	1	1	0.232	0.7869	4.6933
330800	2020	332820	衢州市	0.01	2.95	1.84877	0.007985	0.16851	0.03	12373	220110	2000000	246	0.21	0.280446	0.306548	0.256122	0.02	0.0781244	0.000627	0.012419	0.01249	0.000556	49300	247.51	0	1	1	0.2886	0.5984	4.93
330800	2021	332821	衢州市	0	2.96	1.90026	0.008102	0.16846	0.04	12967	226180	2100000	248	0.24	0.276157	0.316426	0.261959	0.01	0.0846491	0.001395	0.00073	0.000477	0.000356	54577	246.34	0	1	1	0.2478	0.1437	5.4577
330800	2022	332822	衢州市	0	2.97	2.13001	0.008167	0.1544	0.05	13581	266194	2300000	270	0.27	0.283425	0.304915	0.270243	0	0.0897168	9e-05	0.000598	0.004383	0.000107	57465	246.07	0	1	1	0.2207	0.1209	5.7465
330800	2023	332823	衢州市	0	2.98	2.37313	0.008203	0.19526	0.05	14214	289407	2400000	282	0.3	0.285403	0.33671	0.284271	0	0.102222	0.000841	0.000515	0.001131	0.000225	60592	247.66	0	1	1	0.2422		6.0592
330900	2003	332903	舟山市	0	6.74	1.10367	0.001704	0.06146	0.01	3777	72649	451982	54	0.01	0.13408	0.492975	0.165256		0.027478	0	3e-05	0.002016	3.2e-05	12745	219.4	0	1	1	0.0027	0.063958	1.2745
330900	2004	332904	舟山市	0	6.73	1.10923	0.002251	0.10253	0.01	5430	98136	452403	51	0.01	0.13643	0.469248	0.168302	0	0.0294719	5e-07	0.001205	0.001813	0.001773	13747	219.9	0	1	1	0.0017	0.0825	1.3747
330900	2005	332905	舟山市	0.01	6.72	1.01619	0.00312	0.13481	0.01	6717	82419	452965	59	0.01	0.114001	0.570104	0.185585	0	0.0326373	1e-06	0.008461	0.00322	0.000308	15524	230.82	0	1	1	0.0032	0.0988	1.5524
330900	2006	332906	舟山市	0.09	6.71	1.11352	0.005003	0.17311	0.01	8306	98134	453712	74	0.02	0.121781	0.594251	0.190252	0.01	0.0351019	0.084956	0.000508	0.019242	0.000962	17525	232.41	0	1	1	0.0024	0.113619	1.7525
330900	2007	332907	舟山市	0.01	6.71	1.18606	0.007516	0.20809	0.01	9299	106141	454708	104	0.03	0.138411	0.620345	0.197413	0.09	0.0408151	2e-06	0.006201	5e-07	6.6e-05	19856	233.29	0	1	1	0.004	0.128507	1.9856
330900	2008	332908	舟山市	0.01	6.72	1.29614	0.015855	0.22695	0.01	10205	121058	456037	96	0.05	0.156611	0.562051	0.198523	0.01	0.0439681	8.4e-05	0.007464	0.007294	6.2e-05	22257	232.75	0	1	1	0.0077	0.149528	2.2257
330900	2009	332909	舟山市	0.05	6.72	1.59559	0.010595	0.22389	0.01	10943	122251	457809	108	0.07	0.154584	0.589546	0.205023	0.01	0.0467898	0.000597	0.049276	0.049705	2.5e-05	24082	234.14	0	1	1	0.0087	0.173058	2.4082
330900	2010	332910	舟山市	0.06	6.72	0.637574	0.006719	0.22327	0.01	14329	135819	460177	129	0.11	0.16301	0.581162	0.216384	0.05	0.0527568	0.000553	0.057363	0.05746	0.000627	26242	234.22	0	1	1	0.0188	0.211332	2.6242
330900	2011	332911	舟山市	0.02	6.74	1.50457	0.010788	0.22934	0.01	17885	143206	463345	153	0.16	0.191655	0.51643	0.229306	0.06	0.0602576	0.00128	0.022201	0.019548	2.6e-06	30496	234.14	0	1	1	0.035	0.243278	3.0496
330900	2012	332912	舟山市	0.02	6.68	1.45037	0.018339	0.22989	0.01	19985	151569	467592	154	0.22	0.181935	0.551224	0.241026	0.02	0.0674445	0.004129	0.011567	0.044541	0.000456	34223.8	234.64	0	1	1	0.0422	0.273997	3.42238
330900	2013	332913	舟山市	0.01	6.69	1.40127	0.02093	0.23301	0.01	21392	159517	473301	157	0.31	0.203928	0.487963	0.248576	0.02	0.0721673	0.002137	0.003739	0.005576	0.000332	37799	234.2	0	1	1	0.0606	0.303593	3.7799
330900	2014	332914	舟山市	0.02	6.7	1.39475	0.019962	0.22731	0.01	22283	143283	481002	163	0.44	0.185362	0.536798	0.260448	0.01	0.0789634	0.002915	0.012669	0.014822	0.000198	41466	237.23	0	1	1	0.1158	0.34	4.1466
330900	2015	332915	舟山市	0.01	6.67	1.33448	0.007792	0.23468	0.01	25227	136218	491438	168	0.6	0.219292	0.470357	0.271558	0.02	0.0824382	0.0054	0.006384	0.011622	0.000527	44845	237.54	0	1	1	0.1416	0.384398	4.4845
330900	2016	332916	舟山市	0.01	6.66	1.19563	0.021017	0.24521	0.01	28559	143706	505668	162	0.82	0.201855	0.480259	0.3075	0.01	0.0971462	0.003595	0.0067	0.00943	0.000546	48423	237.49	0	1	1	0.15	0.457669	4.8423
330900	2017	332917	舟山市	0.02	6.66	1.38852	0.040518	0.22059	0.01	32331	136142	525234	179	1.1	0.212009	0.48632	0.287552	0.01	0.0917673	0.001829	0.018977	0.019306	0.000202	52516	241.135	0	1	1	0.1639	0.547273	5.2516
330900	2018	332918	舟山市	0.03	6.66	1.52174	0.041762	0.23032	0.01	36599	140672	556700	171	1.5	0.23429	0.473352	0.310496	0.02	0.100612	0.006697	0.021727	0.023817	0.001067	56622	244.78	0	1	1	0.1464	0.629146	5.6622
330900	2019	332919	舟山市	0.02	6.66	1.76817	0.050093	0.24585	0.01	41429	146576	654955	174	2	0.235686	0.478907	0.307979	0.03	0.103255	0.005241	0.017593	0.021119	0.001715	61479	242.91	0	1	1	0.1572	0.7025	6.1479
330900	2020	332920	舟山市	0.03	6.66	1.78786	0.052667	0.25162	0.01	46896	162575	971262	178	2.6	0.206802	0.509137	0.311225	0.02	0.103439	0.007273	0.022597	0.028551	0.001319	63702	239.74	0	1	1	0.1174	0.5236	6.3702
330900	2021	332921	舟山市	0.01	6.66	1.88835	0.052271	0.27735	0.01	53082	178574	1300000	181	3.4	0.197248	0.537621	0.313024	0.03	0.112755	0.00262	0.003516	0.00033	0.000282	69103	236.09	0	1	1	0.1156	0.1241	6.9103
330900	2022	332922	舟山市	0.01	6.66	1.88892	0.052331	0.26182	0.01	60083	193027	1600000	187	4.4	0.181586	0.440753	0.320657	0.01	0.120583	0.002813	0.002331	0.00154	0.007478	71965	232.78	0	1	1	0.0977	0.1112	7.1965
330900	2023	332923	舟山市	0.02	6.66	2.00651	0.052322	0.26567	0.01	68005	201642	1900000	196	5.6	0.179205	0.513968	0.334937	0.01	0.130424	0.01739	0.005241	0.015883	0.006748	76435	233.69	0	1	1	0.0984		7.6435
331000	2003	333003	台州市	0	5.87	0.813129	0.021588	0.11768	0.06	7923	330091	1500000	225	0.04	0.069226	0.765024	0.11153		0.0283685	0	0.000254	0.003746	3e-05	13404	222.24	0	1	1	0.0238	0.106386	1.3404
331000	2004	333004	台州市	0	5.91	0.794765	0.030296	0.15371	0.06	8849	809829	1600000	283	0.05	0.067433	0.707153	0.119383	0	0.031902	0	0.002049	0.00241	5.6e-05	15870	224.08	0	1	1	0.0264	0.123761	1.587
331000	2005	333005	台州市	0.01	5.95	0.834459	0.03378	0.18069	0.06	10247	397886	1600000	361	0.07	0.070371	0.821131	0.132649	0	0.0343648	3.1e-06	0.010914	0.000603	0.000295	17132	230.02	0	1	1	0.0484	0.16075	1.7132
331000	2006	333006	台州市	0.01	6	0.88476	0.041354	0.21079	0.06	12153	444497	1700000	433	0.09	0.071072	0.827995	0.153559	0.01	0.0382201	0.000145	0.005692	3.9e-05	0.0003	18749	231.06	0	1	1	0.0606	0.18038	1.8749
331000	2007	333007	台州市	0	6.05	0.915902	0.03115	0.24307	0.06	14008	525875	1800000	518	0.12	0.073717	0.85761	0.159593	0.01	0.041991	0	0.000404	8.3e-05	0.000365	20626	231.96	0	1	1	0.067	0.217366	2.0626
331000	2008	333008	台州市	0.01	6.1	0.963267	0.02389	0.27254	0.06	14400	605875	1900000	554	0.13	0.078263	0.819528	0.167063	0	0.046668	1.9e-06	0.013427	0.013419	1e-06	22395	232.61	0	1	1	0.0986	0.259485	2.2395
331000	2009	333009	台州市	0.01	6.15	1.23407	0.018806	0.29164	0.07	15383	595634	2000000	567	0.16	0.086232	0.773065	0.171778	0.01	0.0482727	5.1e-05	0.012289	0.012265	9.6e-06	24061	234.2	0	1	1	0.1378	0.288722	2.4061
331000	2010	333010	台州市	0.04	6.2	1.25938	0.013206	0.29749	0.07	18155	619945	2100000	720	0.2	0.091804	0.740192	0.180393	0.01	0.0541138	0.000139	0.035431	0.035376	0.00251	26802	234.06	0	1	1	0.174	0.328566	2.6802
331000	2011	333011	台州市	0.04	6.24	1.26007	0.014301	0.30933	0.07	19685	637092	2300000	791	0.24	0.096402	0.753641	0.191371	0.04	0.0600282	0.000421	0.0363	0.036599	2.6e-06	30030	234.77	0	1	1	0.2215	0.396536	3.003
331000	2012	333012	台州市	0.05	6.28	1.29977	0.04752	0.31132	0.07	21245	716548	2400000	783	0.29	0.098901	0.765552	0.20195	0.04	0.0671723	0.000217	0.044491	0.018045	0.00058	33467	236.44	0	1	1	0.2552	0.446892	3.3467
331000	2013	333013	台州市	0.03	6.31	1.3764	0.040001	0.32018	0.07	22279	718147	2500000	745	0.36	0.104343	0.752923	0.209243	0.05	0.0708192	0.000287	0.033994	0.033782	0.000202	36480	237.39	0	1	1	0.2944	0.516554	3.648
331000	2014	333014	台州市	0.02	6.34	1.45016	0.027705	0.32631	0.07	20222	698860	2600000	759	0.44	0.109662	0.713952	0.223075	0.03	0.0788262	0.000708	0.022158	0.021919	0.000767	39763	239.65	0	1	1	0.3788	0.607885	3.9763
331000	2015	333015	台州市	0.01	6.34	1.52781	0.011635	0.33567	0.07	19743	674120	2800000	740	0.53	0.128652	0.651816	0.236476	0.02	0.0842943	0.000822	0.00693	0.006597	0.000163	43266	241.94	0	1	1	0.4766	0.741917	4.3266
331000	2016	333016	台州市	0.02	6.34	1.47715	0.033683	0.34205	0.07	19329	705566	2900000	771	0.65	0.131943	0.667348	0.247046	0.01	0.0891557	0.001251	0.018112	0.018498	0.000329	47162	242.46	0	1	1	0.5771	0.891149	4.7162
331000	2017	333017	台州市	0.01	6.34	1.45086	0.044332	0.34728	0.07	18972	678804	3100000	826	0.79	0.12832	0.678832	0.253865	0.02	0.0957069	0.000995	0.009234	0.009436	0.013	51374	242.91	0	1	1	0.6517	1.02756	5.1374
331000	2018	333018	台州市	0.07	6.34	1.49523	0.028893	0.35216	0.08	18661	711268	3300000	958	0.96	0.134112	0.659543	0.264589	0.01	0.103548	0.003681	0.063201	0.065492	0.00055	55705	243.36	0	1	1	0.7741	1.18217	5.5705
331000	2019	333019	台州市	0.03	6.34	1.65654	0.062272	0.37349	0.1	18392	743127	3300000	961	1.2	0.150045	0.569234	0.271927	0.07	0.111708	0.004529	0.027278	0.03029	0.001517	60351	242.44	0	1	1	0.6859	1.31557	6.0351
331000	2020	333020	台州市	0.01	6.34	1.86822	0.064886	0.39955	0.13	18157	802550	3600000	944	1.4	0.133031	0.573082	0.275584	0.03	0.111058	0.002472	0.0086	0.00929	0.001782	62598	244.12	0	1	1	0.8679	1.14138	6.2598
331000	2021	333021	台州市	0	6.34	2.00537	0.063179	0.42356	0.15	17952	861974	3900000	928	1.8	0.126997	0.619801	0.283944	0.01	0.119798	0.002128	0.000584	0.000108	0.000211	68053	244.55	0	1	1	0.7501	0.359955	6.8053
331000	2022	333022	台州市	0	6.34	2.26931	0.064281	0.44744	0.16	17773	936237	4100000	955	2.1	0.138211	0.527888	0.293435	0	0.125444	0.000253	0.001561	0.001181	7e-05	70737	244.39	0	1	1	0.6522	0.311394	7.0737
331000	2023	333023	台州市	0.01	6.34	2.5509	0.063564	0.78244	0.17	17617	983945	4400000	954	2.6	0.13405	0.590813	0.306479	0	0.133171	0.00245	0.007782	0.008022	0.002209	73879	246.18	0	1	1	0.6527		7.3879
331100	2003	333103	丽水市	0	1.44	1.04791	0.001245	0.12006	0	2788	88087	173660	65	0.01	0.161609	0.415278	0.143384		0.0198761	4e-07	1.5e-05	0.00023	3e-07	10800	219.4	0	1	1	0.0026	0.02426	1.08
331100	2004	333104	丽水市	0	1.45	0.975744	0.002051	0.15615	0	3008	95508	188485	91	0.01	0.146189	0.418696	0.144204	0	0.0221324	5e-06	0.002218	0.001205	5.6e-05	11892	221.01	0	1	1	0.0045	0.0318	1.1892
331100	2005	333105	丽水市	0.04	1.45	0.937515	0.001943	0.19093	0	2885	101614	205423	145	0.01	0.150053	0.435771	0.133925	0	0.020897	0.00255	0.038006	0.010305	0.000216	12846	225.52	0	1	1	0.0055	0.0486	1.2846
331100	2006	333106	丽水市	0.01	1.46	0.939254	0.001926	0.22028	0	3063	108875	224859	142	0.02	0.155603	0.451041	0.138896	0.04	0.0243051	8e-07	0.00717	0.004715	0.000127	13958	227.68	0	1	1	0.0051	0.0643	1.3958
331100	2007	333107	丽水市	0	1.47	0.943579	0.002232	0.33173	0	3497	126224	247258	200	0.02	0.163349	0.460864	0.151958	0.01	0.0274936	0	5e-07	0.00303	0.001457	15910	229.24	0	1	1	0.0099	0.08559	1.591
331100	2008	333108	丽水市	0.01	1.48	0.930491	0.008102	0.35732	0	3622	141209	273196	202	0.03	0.169624	0.421424	0.146007	0	0.029855	5e-07	0.009375	0.009376	4.9e-05	17710	228.55	0	1	1	0.0086	0.1195	1.771
331100	2009	333109	丽水市	1.2	1.49	1.23009	0.002913	0.34402	0	6894	157362	303378	216	0.04	0.206509	0.331539	0.151842	0.01	0.0285601	1.214	0.018472	1.209	2.6e-05	19018	229.74	0	1	1	0.0127	0.15396	1.9018
331100	2010	333110	丽水市	0.16	1.5	1.23845	0.003751	0.35584	0	7361	185906	338681	225	0.04	0.203838	0.332402	0.162136	1.2	0.0364094	0.13868	0.025222	0.162837	0.000932	21093	230.48	0	1	1	0.0241	0.20653	2.1093
331100	2011	333111	丽水市	0.01	1.45	1.20142	0.00443	0.36599	0	4702	191715	380199	255	0.04	0.193285	0.371797	0.188148	0.16	0.0408879	1.8e-05	0.012112	0.008059	9.7e-05	23391	230.47	0	1	1	0.0434	0.27377	2.3391
331100	2012	333112	丽水市	0.02	1.52	1.23145	0.010386	0.38114	0	4660	178876	429306	281	0.05	0.187831	0.384731	0.184806	0.01	0.0491941	3.7e-05	0.018086	0.044224	0.0001	26309.2	230.97	0	1	1	0.0556	0.35614	2.63092
331100	2013	333113	丽水市	0.01	1.52	1.30896	0.012784	0.3975	0.01	4742	189034	487736	296	0.05	0.19874	0.377218	0.186828	0.02	0.0456311	0.000787	0.007525	0.00754	0.004321	28005	231.14	0	1	1	0.079	0.454388	2.8005
331100	2014	333114	丽水市	0.02	1.54	1.33539	0.017838	0.39738	0.01	5248	181344	557699	289	0.05	0.206582	0.372606	0.208568	0.01	0.0585112	0.00162	0.016644	0.017145	1e-06	30413	234.09	0	1	1	0.0812	0.50891	3.0413
331100	2015	333115	丽水市	0	1.54	1.35214	0.021886	0.37614	0.01	5133	173029	642028	294	0.05	0.253175	0.338337	0.216441	0.02	0.0566593	0.000297	0.000445	0.000424	0.000345	32875	236.77	0	1	1	0.1268	0.62704	3.2875
331100	2016	333116	丽水市	0.01	1.54	1.27532	0.02213	0.36724	0.01	5188	184260	744381	305	0.05	0.282317	0.303118	0.227561	0	0.0615994	0.00023	0.007644	0.00736	0.000444	35968	238.3	0	1	1	0.1352	0.65731	3.5968
331100	2017	333117	丽水市	0.01	1.54	1.37664	0.021665	0.21046	0.02	5162	184359	869518	268	0.05	0.302689	0.298187	0.235426	0.01	0.0651382	0.000495	0.012912	0.013205	0.000943	38996	241.185	0	1	1	0.1886	0.678536	3.8996
331100	2018	333118	丽水市	0.02	1.54	1.37838	0.010691	0.21008	0.02	5174	189079	1000000	263	0.05	0.309765	0.300937	0.244942	0.01	0.0688662	0.008319	0.014332	0.022077	9.7e-05	42557	244.07	0	1	1	0.2655		4.2557
331100	2019	333119	丽水市	0.01	1.54	1.51174	0.012079	0.20952	0.02	5168	195304	1100000	264	0.05	0.356463	0.265585	0.257003	0.02	0.0739869	0.00109	0.009556	0.009994	0.000653	46437	246.69	0	1	1	0.2514	0.7795	4.6437
331100	2020	333120	丽水市	0.01	1.54	1.79462	0.011383	0.2192	0.03	5171	215944	1200000	270	0.05	0.342271	0.27292	0.260585	0.01	0.0756381	0.001025	0.011748	0.008834	0.003939	48532	249.32	0	1	1	0.3584	0.6586	4.8532
331100	2021	333121	丽水市	0	1.54	1.91678	0.011886	0.34993	0.03	5170	236583	1300000	275	0.05	0.319118	0.300473	0.267085	0.01	0.080631	0.000451	3.5e-05	0.000692	3e-05	53259	249.11	0	1	1	0.2435	0.2556	5.3259
331100	2022	333122	丽水市	0	1.54	2.15154	0.011518	0.41758	0.04	5170	281285	1400000	285	0.05	0.331568	0.281439	0.271901	0	0.085222	0.000114	0.001203	0.008346	7.1e-05	55784	247.58	0	1	1	0.2275	0.2294	5.5784
331100	2023	333123	丽水市	0.02	1.54	2.40113	0.011785	0.49865	0.04	5170	310048	1500000	301	0.05	0.332818	0.284639	0.282912	0	0.0913027	0.00744	0.007691	0.013209	0.001922	58583	249.61	0	1	1	0.2444		5.8583
340100	2003	342103	合肥市	0.03	6.09	2.07869	0.026048	1.52502	0.04	4641	242238	607027	120	0.03	0.095734	0.77259	0.136693		0.0279181	0.009634	0.021166	2.5e-05	1.8e-06	7784.05	232.25	1	1	1	0.0331	0.05515	0.778405
[truncated: 4,094 more rows]
